# Supplementary material for: Changes in neural progenitor lineage composition during astrocytic differentiation of human iPSCs
Source: eLife. 2025 Oct 28;13:RP96423. doi: 10.7554/eLife.96423 (PMC12563561; doi:10.7554/eLife.96423)
Supplement: Supplementary file 1. — Table A: Pairwise DEGs among the three astrocyte populations and the neuron population. Table B: GO enrichment of population-enriched DEGs. Table C: Representative enriched GO terms of DEGs for BFP+ and BFP- astrocytes. [file elife-96423-supp1.xlsx]

## Sheet: Description
Files and Abbreviations	Description
Table A	Pairwise differential expression analyses (DEGs) among the three astrocyte populations and the neuron population.
Table B	GO enrichment of population-enriched DEGs
Table C	Representative enriched GO terms of DEGs for BFP+ and BFP- astrocytes.
AS	None patterned astrocyte
AS-BP	BFP+ astrocyte
AS-BN	BFP- astrocyte
N	neurons

## Sheet: Table A
p_val	avg_log2FC	pct.1	pct.2	p_val_adj	gene	cluster
3.95064e-135	4.85572	0.985	0.562	6.90492e-131	COL6A1	AS-BN_vs_AS-BP
4.01672e-88	2.17294	1	0.991	7.02043e-84	ITGB1	AS-BN_vs_AS-BP
4.95436e-86	3.71913	0.985	0.805	8.65923e-82	TGFBI	AS-BN_vs_AS-BP
8.4617e-84	1.90831	1	1	1.47894e-79	MT-CO2	AS-BN_vs_AS-BP
3.0213e-83	5.61309	0.864	0.056	5.28062e-79	ODAPH	AS-BN_vs_AS-BP
5.7461e-83	3.19631	0.995	0.891	1.0043e-78	VCAN	AS-BN_vs_AS-BP
1.46835e-81	1.9345	1	0.999	2.56638e-77	MT-ND4L	AS-BN_vs_AS-BP
1.55056e-81	3.18704	0.985	0.741	2.71008e-77	RHOBTB3	AS-BN_vs_AS-BP
5.74378e-81	3.81152	0.808	0.033	1.0039e-76	PAX7	AS-BN_vs_AS-BP
2.64372e-78	5.83068	0.818	0.04	4.6207e-74	COL10A1	AS-BN_vs_AS-BP
3.66561e-75	3.97373	0.96	0.334	6.40676e-71	GXYLT2	AS-BN_vs_AS-BP
2.08353e-70	4.41665	0.924	0.28	3.64159e-66	INHBA	AS-BN_vs_AS-BP
1.18312e-69	4.32931	0.899	0.214	2.06785e-65	GREM1	AS-BN_vs_AS-BP
1.79793e-67	2.8205	0.904	0.179	3.14243e-63	COL6A2	AS-BN_vs_AS-BP
3.50389e-67	1.61506	1	0.993	6.12409e-63	MT-ATP8	AS-BN_vs_AS-BP
5.81995e-65	2.08312	1	0.991	1.01721e-60	MT-ND3	AS-BN_vs_AS-BP
7.31038e-65	3.48988	0.773	0.115	1.27771e-60	POU3F2	AS-BN_vs_AS-BP
1.74101e-64	2.62061	0.975	0.796	3.04294e-60	B4GALT1	AS-BN_vs_AS-BP
4.59426e-64	3.79127	0.803	0.083	8.02985e-60	KANK4	AS-BN_vs_AS-BP
6.70737e-63	3.26965	0.955	0.194	1.17231e-58	GABRE	AS-BN_vs_AS-BP
2.88377e-62	1.86069	1	1	5.04025e-58	PALLD	AS-BN_vs_AS-BP
4.70655e-59	3.31191	0.864	0.599	8.22611e-55	TNC	AS-BN_vs_AS-BP
4.74447e-59	1.73536	1	1	8.29239e-55	MT-ATP6	AS-BN_vs_AS-BP
1.02652e-57	2.7415	0.995	0.879	1.79415e-53	PMEPA1	AS-BN_vs_AS-BP
1.89892e-57	2.33436	0.975	0.414	3.31893e-53	DONSON	AS-BN_vs_AS-BP
2.79206e-57	3.96699	0.869	0.217	4.87996e-53	IL11	AS-BN_vs_AS-BP
3.60025e-57	2.82087	0.717	0.072	6.29252e-53	IRX3	AS-BN_vs_AS-BP
1.89066e-56	4.44386	0.783	0.114	3.30449e-52	ST6GAL2	AS-BN_vs_AS-BP
1.94753e-56	2.99774	0.975	0.389	3.4039e-52	ACVR2B	AS-BN_vs_AS-BP
1.02838e-55	4.25772	0.864	0.158	1.7974e-51	IGFL3	AS-BN_vs_AS-BP
1.22586e-54	2.21923	1	0.945	2.14257e-50	BASP1	AS-BN_vs_AS-BP
1.06113e-53	1.85245	1	0.993	1.85464e-49	OST4	AS-BN_vs_AS-BP
1.15395e-51	2.3414	0.965	0.821	2.01687e-47	SPOCK1	AS-BN_vs_AS-BP
4.42267e-51	3.39154	0.98	0.577	7.72994e-47	EDIL3	AS-BN_vs_AS-BP
9.26769e-51	1.41472	1	1	1.61981e-46	MT-ND4	AS-BN_vs_AS-BP
1.06056e-49	2.08358	1	0.975	1.85365e-45	SEC61G	AS-BN_vs_AS-BP
1.50621e-49	3.88806	0.818	0.152	2.63255e-45	KRT81	AS-BN_vs_AS-BP
1.07727e-48	1.80379	1	0.979	1.88286e-44	MMP2	AS-BN_vs_AS-BP
1.20064e-47	2.06538	0.889	0.521	2.09849e-43	ARSJ	AS-BN_vs_AS-BP
6.88181e-47	1.56456	1	1	1.2028e-42	SERF2	AS-BN_vs_AS-BP
1.30195e-46	1.9677	1	0.997	2.27554e-42	MYH9	AS-BN_vs_AS-BP
1.81812e-46	2.70586	0.889	0.466	3.17772e-42	ADAMTS16	AS-BN_vs_AS-BP
2.31554e-46	3.42437	1	0.988	4.0471e-42	FN1	AS-BN_vs_AS-BP
3.8868e-46	3.18078	0.848	0.241	6.79334e-42	SDC1	AS-BN_vs_AS-BP
7.64107e-44	3.87748	0.682	0.084	1.33551e-39	RARRES2	AS-BN_vs_AS-BP
4.94216e-43	1.65369	1	0.997	8.6379e-39	MT-ND6	AS-BN_vs_AS-BP
7.43495e-43	1.2179	1	1	1.29948e-38	MT-CO3	AS-BN_vs_AS-BP
1.34401e-42	3.01613	0.828	0.302	2.34907e-38	PAPSS2	AS-BN_vs_AS-BP
5.03099e-42	3.18623	0.854	0.373	8.79317e-38	WNT5A	AS-BN_vs_AS-BP
1.49685e-41	3.25716	0.975	0.858	2.61619e-37	COL8A1	AS-BN_vs_AS-BP
1.9695e-41	2.60206	0.838	0.232	3.4423e-37	L1CAM	AS-BN_vs_AS-BP
2.26107e-41	3.29666	0.652	0.08	3.9519e-37	COL8A2	AS-BN_vs_AS-BP
3.34551e-41	2.17067	0.98	0.657	5.84728e-37	PTK7	AS-BN_vs_AS-BP
4.79165e-41	1.97541	1	0.999	8.37485e-37	B2M	AS-BN_vs_AS-BP
5.7154e-41	2.77654	0.631	0.382	9.98937e-37	NEFL	AS-BN_vs_AS-BP
3.45354e-40	3.38595	0.561	0.068	6.0361e-36	CCDC3	AS-BN_vs_AS-BP
3.83623e-40	2.81897	0.803	0.357	6.70496e-36	DLC1	AS-BN_vs_AS-BP
2.34136e-39	2.87648	0.884	0.528	4.09223e-35	TNS1	AS-BN_vs_AS-BP
2.36005e-39	2.11178	0.551	0.092	4.12489e-35	POU3F3	AS-BN_vs_AS-BP
1.26833e-38	1.76352	0.96	0.902	2.21679e-34	HLA-B	AS-BN_vs_AS-BP
4.60442e-38	1.93759	0.909	0.882	8.04761e-34	PRPS1	AS-BN_vs_AS-BP
5.35322e-38	1.58284	1	1	9.35636e-34	MT-ND1	AS-BN_vs_AS-BP
2.16447e-37	2.47064	0.985	0.793	3.78306e-33	ADAM12	AS-BN_vs_AS-BP
2.50273e-37	3.14155	0.677	0.135	4.37426e-33	RFLNA	AS-BN_vs_AS-BP
1.52784e-36	1.58801	0.864	0.749	2.67036e-32	CELF2	AS-BN_vs_AS-BP
4.16862e-36	4.17894	0.808	0.204	7.28592e-32	POSTN	AS-BN_vs_AS-BP
1.59843e-35	2.34264	0.505	0.025	2.79373e-31	GALNT6	AS-BN_vs_AS-BP
1.98238e-35	2.27561	0.48	0.012	3.4648e-31	SCX	AS-BN_vs_AS-BP
7.54705e-35	1.70572	0.985	0.988	1.31907e-30	TMEM258	AS-BN_vs_AS-BP
5.89932e-34	2.40544	0.995	0.939	1.03108e-29	TIMP2	AS-BN_vs_AS-BP
7.87026e-34	2.292	0.813	0.444	1.37556e-29	GAS6	AS-BN_vs_AS-BP
7.90787e-34	2.62691	0.657	0.197	1.38214e-29	HS3ST3A1	AS-BN_vs_AS-BP
9.06834e-34	2.07145	1	0.999	1.58496e-29	COL1A1	AS-BN_vs_AS-BP
1.2809e-33	1.61583	1	1	2.23875e-29	ATP5F1E	AS-BN_vs_AS-BP
2.51211e-33	2.38074	0.864	0.538	4.39066e-29	NTN1	AS-BN_vs_AS-BP
2.74923e-33	2.1109	0.929	0.692	4.8051e-29	ITGA5	AS-BN_vs_AS-BP
4.53438e-33	0.957827	1	1	7.92519e-29	CAP1	AS-BN_vs_AS-BP
4.71869e-33	1.69258	0.934	0.885	8.24732e-29	ALDH1B1	AS-BN_vs_AS-BP
7.23664e-33	2.49193	0.808	0.504	1.26482e-28	LIF	AS-BN_vs_AS-BP
8.26103e-33	1.1776	1	1	1.44386e-28	MT-ND2	AS-BN_vs_AS-BP
1.02594e-32	2.32473	0.944	0.565	1.79314e-28	AEBP1	AS-BN_vs_AS-BP
1.09537e-32	2.24896	0.995	0.916	1.91448e-28	COL5A1	AS-BN_vs_AS-BP
1.48504e-32	1.0114	1	0.999	2.59555e-28	MT-ND5	AS-BN_vs_AS-BP
1.50445e-32	2.23386	0.914	0.709	2.62947e-28	NCOR2	AS-BN_vs_AS-BP
1.92994e-32	2.20426	0.606	0.146	3.37314e-28	OLFML2B	AS-BN_vs_AS-BP
2.85767e-32	2.54456	0.884	0.638	4.99464e-28	MCAM	AS-BN_vs_AS-BP
5.75421e-32	1.9026	0.909	0.599	1.00572e-27	FSTL3	AS-BN_vs_AS-BP
6.54663e-32	1.76433	0.914	0.864	1.14422e-27	FRMD6	AS-BN_vs_AS-BP
6.99127e-32	2.70716	0.561	0.044	1.22193e-27	APCDD1L	AS-BN_vs_AS-BP
1.28515e-31	1.67043	0.975	0.941	2.24619e-27	RBMS1	AS-BN_vs_AS-BP
3.60495e-31	1.90545	0.677	0.277	6.30074e-27	EFEMP2	AS-BN_vs_AS-BP
3.73743e-31	0.558417	0.98	0.988	6.53229e-27	TUBB2A	AS-BN_vs_AS-BP
3.88195e-31	1.9355	0.379	0.084	6.78488e-27	PAX3	AS-BN_vs_AS-BP
4.99277e-31	2.78101	0.768	0.275	8.72637e-27	ADAMTSL1	AS-BN_vs_AS-BP
5.76593e-31	1.91167	0.99	0.978	1.00777e-26	CKAP4	AS-BN_vs_AS-BP
9.30002e-31	1.87892	0.424	0.036	1.62546e-26	DPPA4	AS-BN_vs_AS-BP
1.75379e-30	2.82018	0.894	0.404	3.06527e-26	NEXN	AS-BN_vs_AS-BP
1.97468e-30	1.88925	0.919	0.76	3.45134e-26	SSBP3	AS-BN_vs_AS-BP
3.61425e-30	0.82661	1	1	6.31698e-26	MT-CO1	AS-BN_vs_AS-BP
4.12654e-30	2.73598	0.606	0.306	7.21237e-26	TSPAN13	AS-BN_vs_AS-BP
5.41315e-30	1.90484	0.939	0.879	9.4611e-26	S100A13	AS-BN_vs_AS-BP
1.02281e-29	2.23766	0.99	0.805	1.78767e-25	LOXL1	AS-BN_vs_AS-BP
1.46765e-29	1.28726	1	1	2.56515e-25	RPL37A	AS-BN_vs_AS-BP
7.39914e-29	1.11474	1	0.999	1.29322e-24	MT-CYB	AS-BN_vs_AS-BP
1.16695e-28	2.34516	0.747	0.436	2.0396e-24	DSE	AS-BN_vs_AS-BP
7.69942e-28	2.51537	0.611	0.25	1.3457e-23	TFAP2C	AS-BN_vs_AS-BP
9.0719e-28	1.34862	0.717	0.288	1.58559e-23	MMP14	AS-BN_vs_AS-BP
2.40211e-27	1.60794	0.793	0.484	4.19841e-23	CERCAM	AS-BN_vs_AS-BP
3.79296e-27	2.79323	0.374	0.021	6.62933e-23	RGCC	AS-BN_vs_AS-BP
4.51792e-27	2.9958	0.616	0.182	7.89642e-23	MYL9	AS-BN_vs_AS-BP
4.78869e-27	2.32929	0.818	0.383	8.36968e-23	MLXIP	AS-BN_vs_AS-BP
1.14021e-26	2.6058	0.49	0.146	1.99286e-22	KIT	AS-BN_vs_AS-BP
2.42029e-26	2.27287	0.975	0.575	4.23019e-22	S100A16	AS-BN_vs_AS-BP
5.02524e-26	1.74514	0.995	0.914	8.78311e-22	IGFBP5	AS-BN_vs_AS-BP
5.30496e-26	1.38419	1	0.999	9.27201e-22	RPS24	AS-BN_vs_AS-BP
1.40845e-25	1.45137	0.944	0.825	2.46169e-21	P3H4	AS-BN_vs_AS-BP
1.50969e-25	2.29841	0.869	0.599	2.63864e-21	BRI3	AS-BN_vs_AS-BP
2.53948e-25	2.21455	0.975	0.766	4.43851e-21	FILIP1L	AS-BN_vs_AS-BP
7.2426e-25	0.901834	1	1	1.26586e-20	VIM	AS-BN_vs_AS-BP
8.13079e-25	1.31781	1	1	1.4211e-20	COX7A2	AS-BN_vs_AS-BP
9.28702e-25	1.28259	1	0.999	1.62319e-20	RPS29	AS-BN_vs_AS-BP
1.10347e-24	1.99265	0.864	0.775	1.92864e-20	GLS	AS-BN_vs_AS-BP
1.513e-24	1.43064	0.99	0.988	2.64443e-20	CAPNS1	AS-BN_vs_AS-BP
1.73165e-24	2.67109	0.672	0.243	3.02658e-20	SFRP2	AS-BN_vs_AS-BP
2.42663e-24	3.35133	0.672	0.256	4.24126e-20	SCG2	AS-BN_vs_AS-BP
3.28854e-24	1.47859	0.98	0.933	5.74771e-20	PRKAR2A	AS-BN_vs_AS-BP
4.66978e-24	1.5278	0.833	0.735	8.16184e-20	PRICKLE1	AS-BN_vs_AS-BP
6.39676e-24	2.21312	0.429	0.08	1.11803e-19	LAMA4	AS-BN_vs_AS-BP
6.48648e-24	1.51052	0.525	0.21	1.13371e-19	EN1	AS-BN_vs_AS-BP
8.95429e-24	1.14591	0.949	0.923	1.56503e-19	HLA-C	AS-BN_vs_AS-BP
9.62122e-24	1.11457	0.899	0.913	1.6816e-19	SPCS3	AS-BN_vs_AS-BP
1.87268e-23	2.29612	0.525	0.178	3.27307e-19	VGLL3	AS-BN_vs_AS-BP
3.07286e-23	0.655087	1	1	5.37075e-19	FSTL1	AS-BN_vs_AS-BP
5.66855e-23	1.8845	0.944	0.861	9.9075e-19	PPP1R14B	AS-BN_vs_AS-BP
1.23064e-22	4.66965	0.813	0.219	2.15091e-18	COL1A2	AS-BN_vs_AS-BP
1.91679e-22	1.36151	1	0.999	3.35016e-18	NDUFA1	AS-BN_vs_AS-BP
2.05017e-22	1.52028	0.288	0.012	3.58329e-18	INHBB	AS-BN_vs_AS-BP
2.78234e-22	1.46505	0.995	0.991	4.86298e-18	ATP5MK	AS-BN_vs_AS-BP
4.25116e-22	1.15719	0.975	0.988	7.43018e-18	CAPN2	AS-BN_vs_AS-BP
5.86905e-22	2.16035	0.551	0.141	1.02579e-17	SRPX2	AS-BN_vs_AS-BP
6.66829e-22	1.26129	1	0.997	1.16548e-17	POMP	AS-BN_vs_AS-BP
7.13523e-22	2.358	0.798	0.417	1.2471e-17	DYSF	AS-BN_vs_AS-BP
7.92786e-22	1.04538	0.995	0.999	1.38563e-17	CCNI	AS-BN_vs_AS-BP
1.00557e-21	2.05446	0.717	0.219	1.75754e-17	SPOCD1	AS-BN_vs_AS-BP
1.04837e-21	2.20131	0.788	0.509	1.83235e-17	PLCB4	AS-BN_vs_AS-BP
2.8661e-21	2.09566	0.308	0.031	5.00937e-17	NETO1	AS-BN_vs_AS-BP
2.99959e-21	0.326425	0.995	0.993	5.24269e-17	SERPINH1	AS-BN_vs_AS-BP
3.69225e-21	1.39081	0.99	0.996	6.45331e-17	RPL36AL	AS-BN_vs_AS-BP
6.58144e-21	0.615574	0.99	0.988	1.1503e-16	HIF1A	AS-BN_vs_AS-BP
9.78379e-21	1.85559	0.323	0.021	1.71001e-16	IRX5	AS-BN_vs_AS-BP
1.02781e-20	2.53979	0.374	0.031	1.7964e-16	GALNT15	AS-BN_vs_AS-BP
1.03153e-20	1.95163	0.894	0.783	1.80291e-16	RPL22L1	AS-BN_vs_AS-BP
1.23434e-20	2.73491	0.394	0.037	2.15738e-16	BHLHE41	AS-BN_vs_AS-BP
1.28042e-20	2.00253	0.449	0.18	2.23792e-16	TNIK	AS-BN_vs_AS-BP
1.64637e-20	1.94235	0.818	0.737	2.87753e-16	GOPC	AS-BN_vs_AS-BP
1.80001e-20	1.20711	0.899	0.793	3.14605e-16	FUS	AS-BN_vs_AS-BP
1.83286e-20	1.05568	1	1	3.20348e-16	ANXA5	AS-BN_vs_AS-BP
2.7331e-20	2.11381	0.379	0.093	4.77691e-16	ANGPT1	AS-BN_vs_AS-BP
3.35713e-20	1.70082	0.722	0.572	5.8676e-16	PYGL	AS-BN_vs_AS-BP
3.81463e-20	2.36792	0.288	0.056	6.66722e-16	CNTN1	AS-BN_vs_AS-BP
4.70903e-20	2.13455	0.333	0.107	8.23044e-16	TRIM9	AS-BN_vs_AS-BP
5.72612e-20	1.81146	0.662	0.469	1.00081e-15	ACVR2A	AS-BN_vs_AS-BP
5.7916e-20	2.0221	0.96	0.753	1.01226e-15	MAP7D1	AS-BN_vs_AS-BP
6.39941e-20	2.48499	0.551	0.243	1.11849e-15	PCSK5	AS-BN_vs_AS-BP
7.50447e-20	1.48666	0.995	0.981	1.31163e-15	SEC61B	AS-BN_vs_AS-BP
9.66251e-20	1.83468	0.909	0.59	1.68881e-15	MRC2	AS-BN_vs_AS-BP
1.05194e-19	0.298086	0.545	0.149	1.83857e-15	BDH1	AS-BN_vs_AS-BP
1.33177e-19	2.4918	0.338	0.052	2.32767e-15	TRPC4	AS-BN_vs_AS-BP
1.38286e-19	1.63177	0.949	0.685	2.41697e-15	EHD2	AS-BN_vs_AS-BP
1.58605e-19	1.41567	0.995	0.994	2.7721e-15	RPL39	AS-BN_vs_AS-BP
2.39045e-19	1.73284	0.924	0.907	4.17803e-15	PLOD2	AS-BN_vs_AS-BP
2.9563e-19	1.36014	0.929	0.886	5.16701e-15	MEST	AS-BN_vs_AS-BP
5.10104e-19	1.30018	1	1	8.9156e-15	NDUFA4	AS-BN_vs_AS-BP
8.1099e-19	2.03877	1	0.945	1.41745e-14	COL4A2	AS-BN_vs_AS-BP
9.02852e-19	2.03007	0.788	0.581	1.578e-14	CMIP	AS-BN_vs_AS-BP
9.47056e-19	2.1789	0.702	0.244	1.65526e-14	SSC5D	AS-BN_vs_AS-BP
1.02768e-18	0.890325	0.975	0.979	1.79617e-14	TMEM263	AS-BN_vs_AS-BP
2.94893e-18	2.55848	0.788	0.379	5.15414e-14	MXRA5	AS-BN_vs_AS-BP
3.62821e-18	1.986	0.379	0.111	6.34139e-14	CYTL1	AS-BN_vs_AS-BP
4.38529e-18	1.4284	0.343	0.135	7.66462e-14	SLFN12	AS-BN_vs_AS-BP
4.63074e-18	2.32819	0.657	0.352	8.09361e-14	KIAA1217	AS-BN_vs_AS-BP
8.1748e-18	0.720541	0.995	0.993	1.42879e-13	HDLBP	AS-BN_vs_AS-BP
1.08623e-17	2.03752	0.955	0.642	1.89851e-13	NTM	AS-BN_vs_AS-BP
1.23047e-17	1.59849	0.864	0.793	2.15061e-13	CAV2	AS-BN_vs_AS-BP
1.51881e-17	2.21249	0.263	0.007	2.65458e-13	SPANXB1	AS-BN_vs_AS-BP
1.89574e-17	1.65394	0.434	0.104	3.31337e-13	APBA1	AS-BN_vs_AS-BP
1.95949e-17	1.96269	0.399	0.056	3.42479e-13	MELTF	AS-BN_vs_AS-BP
2.12203e-17	1.39931	0.354	0.03	3.70889e-13	AMZ1	AS-BN_vs_AS-BP
3.52964e-17	1.63352	0.995	0.967	6.1691e-13	PXDN	AS-BN_vs_AS-BP
3.88962e-17	1.44416	0.99	0.978	6.79828e-13	SEM1	AS-BN_vs_AS-BP
4.40286e-17	2.10301	0.672	0.348	7.69532e-13	PIEZO2	AS-BN_vs_AS-BP
5.72083e-17	1.71794	0.712	0.436	9.99886e-13	NET1	AS-BN_vs_AS-BP
5.85474e-17	1.85924	1	0.985	1.02329e-12	COL4A1	AS-BN_vs_AS-BP
6.40036e-17	0.463354	0.359	0.024	1.11866e-12	C10orf53	AS-BN_vs_AS-BP
6.48129e-17	0.871786	0.894	0.837	1.1328e-12	LMNA	AS-BN_vs_AS-BP
6.58179e-17	1.71362	0.732	0.549	1.15037e-12	GPC6	AS-BN_vs_AS-BP
6.67362e-17	1.43453	0.768	0.572	1.16642e-12	SIPA1L1	AS-BN_vs_AS-BP
7.40173e-17	1.37881	1	0.993	1.29367e-12	RTN4	AS-BN_vs_AS-BP
8.11867e-17	1.83167	0.874	0.734	1.41898e-12	AUTS2	AS-BN_vs_AS-BP
8.47074e-17	2.06747	0.298	0.018	1.48052e-12	SPANXC	AS-BN_vs_AS-BP
8.96437e-17	2.13546	0.525	0.197	1.56679e-12	CALB2	AS-BN_vs_AS-BP
1.04553e-16	1.60737	0.591	0.377	1.82738e-12	TSPAN18	AS-BN_vs_AS-BP
1.27628e-16	1.93593	0.773	0.509	2.23068e-12	CEMIP2	AS-BN_vs_AS-BP
1.30947e-16	2.31594	0.652	0.322	2.28869e-12	NRG1	AS-BN_vs_AS-BP
1.47164e-16	1.26883	0.646	0.519	2.57213e-12	TBC1D10A	AS-BN_vs_AS-BP
1.49642e-16	1.07728	1	1	2.61545e-12	RPL34	AS-BN_vs_AS-BP
1.59477e-16	1.72773	0.717	0.416	2.78733e-12	MYO9B	AS-BN_vs_AS-BP
1.69077e-16	0.252961	0.54	0.899	2.95513e-12	NFU1	AS-BN_vs_AS-BP
2.09835e-16	2.20691	0.692	0.359	3.66749e-12	CRABP2	AS-BN_vs_AS-BP
3.98987e-16	1.29373	0.929	0.874	6.9735e-12	FKBP14	AS-BN_vs_AS-BP
5.09427e-16	1.1777	1	1	8.90376e-12	RPL35A	AS-BN_vs_AS-BP
5.38598e-16	1.2899	0.98	0.988	9.41361e-12	CAV1	AS-BN_vs_AS-BP
5.977e-16	2.20327	0.515	0.152	1.04466e-11	GALNT5	AS-BN_vs_AS-BP
6.00233e-16	2.1946	0.697	0.417	1.04909e-11	SSPN	AS-BN_vs_AS-BP
6.31749e-16	0.988192	0.985	0.994	1.10417e-11	SUB1	AS-BN_vs_AS-BP
8.14174e-16	1.65361	0.939	0.916	1.42301e-11	PPME1	AS-BN_vs_AS-BP
1.00677e-15	1.6485	0.899	0.787	1.75964e-11	TRIO	AS-BN_vs_AS-BP
1.03417e-15	1.69064	0.869	0.809	1.80752e-11	ZNF281	AS-BN_vs_AS-BP
1.20022e-15	0.557097	0.929	0.914	2.09775e-11	FSCN1	AS-BN_vs_AS-BP
1.54441e-15	1.29372	0.949	0.938	2.69932e-11	TCF4	AS-BN_vs_AS-BP
1.62503e-15	2.42818	0.652	0.203	2.84022e-11	ADAMTS6	AS-BN_vs_AS-BP
1.66975e-15	1.11649	1	1	2.91839e-11	RPL38	AS-BN_vs_AS-BP
2.13226e-15	2.05953	0.742	0.536	3.72676e-11	PBX3	AS-BN_vs_AS-BP
2.69051e-15	1.07586	0.919	0.956	4.70247e-11	SACS	AS-BN_vs_AS-BP
3.29552e-15	1.30166	0.995	0.982	5.75991e-11	TMA7	AS-BN_vs_AS-BP
3.87482e-15	1.79245	0.97	0.907	6.77241e-11	PLAU	AS-BN_vs_AS-BP
3.89673e-15	2.25437	0.717	0.438	6.8107e-11	TANC2	AS-BN_vs_AS-BP
4.56403e-15	1.36534	0.808	0.661	7.97701e-11	ARFGAP1	AS-BN_vs_AS-BP
5.20394e-15	1.42837	0.924	0.936	9.09544e-11	SPATS2L	AS-BN_vs_AS-BP
5.76798e-15	1.49369	0.818	0.618	1.00813e-10	PLEKHO1	AS-BN_vs_AS-BP
5.92021e-15	2.46695	0.298	0.055	1.03473e-10	ADAMTS5	AS-BN_vs_AS-BP
6.265e-15	1.48641	0.313	0.033	1.095e-10	EXTL1	AS-BN_vs_AS-BP
7.28356e-15	1.43147	0.369	0.098	1.27302e-10	SLC38A3	AS-BN_vs_AS-BP
7.32484e-15	1.01869	0.318	0.105	1.28024e-10	PACSIN3	AS-BN_vs_AS-BP
8.6422e-15	1.39161	0.995	0.988	1.51048e-10	SNRPG	AS-BN_vs_AS-BP
1.03283e-14	1.63287	0.283	0.075	1.80518e-10	GREB1L	AS-BN_vs_AS-BP
1.11478e-14	1.92928	0.803	0.583	1.94841e-10	MICAL2	AS-BN_vs_AS-BP
1.14967e-14	1.396	0.48	0.322	2.0094e-10	HIVEP3	AS-BN_vs_AS-BP
1.21227e-14	1.42696	0.929	0.91	2.1188e-10	NDUFB1	AS-BN_vs_AS-BP
1.30607e-14	1.15093	0.379	0.207	2.28275e-10	NME3	AS-BN_vs_AS-BP
1.65228e-14	1.7374	1	0.994	2.88786e-10	LGALS1	AS-BN_vs_AS-BP
1.87089e-14	2.13317	0.379	0.133	3.26994e-10	VASH2	AS-BN_vs_AS-BP
2.05376e-14	1.74641	0.515	0.364	3.58956e-10	C12orf75	AS-BN_vs_AS-BP
2.30542e-14	1.68641	0.763	0.725	4.02941e-10	ARL4A	AS-BN_vs_AS-BP
2.54106e-14	1.22344	0.253	0.059	4.44127e-10	SALL4	AS-BN_vs_AS-BP
3.05069e-14	1.318	0.818	0.871	5.332e-10	RBIS	AS-BN_vs_AS-BP
3.35676e-14	0.255654	0.631	0.938	5.86694e-10	TXNDC9	AS-BN_vs_AS-BP
3.50306e-14	1.17562	0.667	0.42	6.12264e-10	FLNC	AS-BN_vs_AS-BP
3.93143e-14	0.805421	0.869	0.778	6.87136e-10	TES	AS-BN_vs_AS-BP
4.12769e-14	1.762	0.51	0.209	7.21437e-10	CHCHD10	AS-BN_vs_AS-BP
4.14546e-14	1.26941	1	0.996	7.24544e-10	RPS27L	AS-BN_vs_AS-BP
5.61559e-14	1.32852	0.939	0.951	9.81492e-10	PAWR	AS-BN_vs_AS-BP
7.16103e-14	1.02628	1	0.996	1.2516e-09	RPS15A	AS-BN_vs_AS-BP
7.31208e-14	1.69068	0.722	0.62	1.27801e-09	FRMD4A	AS-BN_vs_AS-BP
7.36376e-14	1.40148	0.823	0.8	1.28704e-09	PFDN4	AS-BN_vs_AS-BP
7.59118e-14	1.39959	0.995	0.987	1.32679e-09	ATP5ME	AS-BN_vs_AS-BP
8.87088e-14	1.89882	0.303	0.04	1.55045e-09	HSD17B6	AS-BN_vs_AS-BP
9.65329e-14	1.2673	0.929	0.809	1.6872e-09	IGF1R	AS-BN_vs_AS-BP
1.12081e-13	0.756439	0.909	0.926	1.95894e-09	YKT6	AS-BN_vs_AS-BP
1.26988e-13	0.533181	0.879	0.933	2.21949e-09	TCF12	AS-BN_vs_AS-BP
1.45565e-13	1.65959	0.369	0.083	2.54418e-09	ITGB3	AS-BN_vs_AS-BP
2.28185e-13	1.38071	0.995	0.988	3.98821e-09	RPS26	AS-BN_vs_AS-BP
2.61574e-13	1.07773	1	1	4.57179e-09	TPT1	AS-BN_vs_AS-BP
2.73218e-13	1.42577	0.727	0.706	4.77531e-09	CPE	AS-BN_vs_AS-BP
2.81221e-13	1.30595	0.904	0.74	4.91518e-09	LRP1	AS-BN_vs_AS-BP
2.8248e-13	1.56383	0.965	0.944	4.93718e-09	PGRMC2	AS-BN_vs_AS-BP
3.65905e-13	1.53626	0.944	0.901	6.39528e-09	HNRNPD	AS-BN_vs_AS-BP
3.85062e-13	0.604689	0.359	0.678	6.73012e-09	MED31	AS-BN_vs_AS-BP
4.97721e-13	0.481963	0.389	0.787	8.69916e-09	TMEM60	AS-BN_vs_AS-BP
5.34858e-13	0.953081	0.939	0.951	9.34824e-09	UGP2	AS-BN_vs_AS-BP
5.61692e-13	0.268591	0.429	0.802	9.81725e-09	HAUS1	AS-BN_vs_AS-BP
5.87138e-13	1.06767	0.944	0.888	1.0262e-08	CREB3L1	AS-BN_vs_AS-BP
6.2205e-13	1.87366	0.657	0.464	1.08722e-08	PSD3	AS-BN_vs_AS-BP
6.70791e-13	0.519016	1	1	1.17241e-08	CALU	AS-BN_vs_AS-BP
7.59602e-13	1.56245	0.96	0.926	1.32763e-08	ADAM19	AS-BN_vs_AS-BP
7.79948e-13	1.13253	0.874	0.839	1.36319e-08	FKBP9	AS-BN_vs_AS-BP
8.2335e-13	1.07422	0.99	0.99	1.43905e-08	CAVIN1	AS-BN_vs_AS-BP
8.43082e-13	1.41955	0.98	0.954	1.47354e-08	PDGFC	AS-BN_vs_AS-BP
9.42574e-13	1.20463	0.788	0.643	1.64743e-08	TNFRSF19	AS-BN_vs_AS-BP
1.02122e-12	0.742337	1	0.993	1.78489e-08	NUCKS1	AS-BN_vs_AS-BP
1.63039e-12	0.909008	0.449	0.228	2.8496e-08	SLC12A4	AS-BN_vs_AS-BP
1.75696e-12	1.09038	1	1	3.07081e-08	RPS27A	AS-BN_vs_AS-BP
2.0311e-12	1.19347	0.348	0.402	3.54995e-08	STMN2	AS-BN_vs_AS-BP
2.25587e-12	1.21446	0.318	0.065	3.94281e-08	TCF7	AS-BN_vs_AS-BP
3.60148e-12	1.39331	0.995	0.966	6.29466e-08	ATOX1	AS-BN_vs_AS-BP
3.9712e-12	1.15828	0.313	0.098	6.94086e-08	MEIS2	AS-BN_vs_AS-BP
4.11257e-12	1.51052	0.763	0.604	7.18795e-08	NCS1	AS-BN_vs_AS-BP
4.22776e-12	1.2956	0.323	0.068	7.38928e-08	BAIAP2L1	AS-BN_vs_AS-BP
4.28246e-12	1.68077	0.667	0.357	7.48488e-08	TEAD3	AS-BN_vs_AS-BP
4.32835e-12	0.645242	0.985	0.991	7.56509e-08	YWHAG	AS-BN_vs_AS-BP
4.75238e-12	1.44314	0.854	0.842	8.30621e-08	MN1	AS-BN_vs_AS-BP
4.75645e-12	1.57995	0.869	0.62	8.31332e-08	RRBP1	AS-BN_vs_AS-BP
6.2943e-12	1.65438	0.414	0.108	1.10012e-07	ZNF469	AS-BN_vs_AS-BP
6.3088e-12	1.10796	1	1	1.10265e-07	RPS27	AS-BN_vs_AS-BP
7.17078e-12	0.748139	0.914	0.898	1.25331e-07	SLC2A1	AS-BN_vs_AS-BP
1.16035e-11	1.63724	0.778	0.72	2.02806e-07	PGM2L1	AS-BN_vs_AS-BP
1.18641e-11	1.51022	0.97	0.969	2.0736e-07	ITGAV	AS-BN_vs_AS-BP
1.38534e-11	0.791238	0.813	0.859	2.4213e-07	IDH2	AS-BN_vs_AS-BP
1.43128e-11	1.03529	0.606	0.657	2.50159e-07	NOL4L	AS-BN_vs_AS-BP
1.52309e-11	1.19744	1	0.997	2.66205e-07	RPL37	AS-BN_vs_AS-BP
1.63408e-11	1.11899	0.949	0.978	2.85604e-07	SLIRP	AS-BN_vs_AS-BP
1.70397e-11	0.762783	0.808	0.821	2.97819e-07	PTBP3	AS-BN_vs_AS-BP
1.88654e-11	0.518486	0.551	0.831	3.29729e-07	NDUFAF4	AS-BN_vs_AS-BP
1.98245e-11	0.792018	0.995	0.999	3.46493e-07	HSP90B1	AS-BN_vs_AS-BP
2.15839e-11	0.40239	0.955	0.947	3.77244e-07	EIF4G1	AS-BN_vs_AS-BP
2.27102e-11	1.49803	0.586	0.374	3.96928e-07	MEF2D	AS-BN_vs_AS-BP
2.29583e-11	0.804119	1	0.988	4.01264e-07	TLN1	AS-BN_vs_AS-BP
2.38775e-11	1.90681	0.268	0.044	4.1733e-07	OPCML	AS-BN_vs_AS-BP
2.48033e-11	2.14435	0.707	0.53	4.33513e-07	ELN	AS-BN_vs_AS-BP
2.94757e-11	0.868133	0.96	0.976	5.15176e-07	NDUFC2	AS-BN_vs_AS-BP
3.00952e-11	1.81431	0.99	0.945	5.26003e-07	GNG11	AS-BN_vs_AS-BP
3.46442e-11	2.89357	0.914	0.436	6.05512e-07	ACTG2	AS-BN_vs_AS-BP
3.74784e-11	0.985286	0.576	0.725	6.55048e-07	MAGOHB	AS-BN_vs_AS-BP
4.92524e-11	1.81781	0.657	0.377	8.60834e-07	FIBCD1	AS-BN_vs_AS-BP
4.95951e-11	1.08119	0.732	0.811	8.66823e-07	NT5E	AS-BN_vs_AS-BP
4.99356e-11	0.256382	0.803	0.984	8.72775e-07	SBDS	AS-BN_vs_AS-BP
5.491e-11	1.12289	1	0.999	9.59717e-07	TXN	AS-BN_vs_AS-BP
5.74814e-11	1.54627	0.626	0.302	1.00466e-06	ZNF703	AS-BN_vs_AS-BP
5.75349e-11	1.31132	0.889	0.914	1.0056e-06	FAM120A	AS-BN_vs_AS-BP
6.33256e-11	0.545554	0.813	0.891	1.1068e-06	DBN1	AS-BN_vs_AS-BP
6.56514e-11	1.06036	1	0.994	1.14746e-06	RPL28	AS-BN_vs_AS-BP
6.68801e-11	1.24706	0.687	0.377	1.16893e-06	RUNX1T1	AS-BN_vs_AS-BP
9.15698e-11	1.0144	0.949	0.97	1.60046e-06	SRSF11	AS-BN_vs_AS-BP
1.06595e-10	1.36334	0.803	0.743	1.86306e-06	MINDY2	AS-BN_vs_AS-BP
1.16662e-10	1.03017	0.828	0.899	2.03902e-06	HNRNPA0	AS-BN_vs_AS-BP
1.16939e-10	1.50668	0.616	0.296	2.04386e-06	P3H3	AS-BN_vs_AS-BP
1.43058e-10	1.23206	0.98	0.985	2.50036e-06	ROMO1	AS-BN_vs_AS-BP
1.43895e-10	1.45321	0.359	0.151	2.51499e-06	ZNF697	AS-BN_vs_AS-BP
1.65048e-10	0.994301	0.864	0.842	2.88471e-06	P3H1	AS-BN_vs_AS-BP
1.70103e-10	1.45344	0.581	0.343	2.97307e-06	KCNMA1	AS-BN_vs_AS-BP
1.73408e-10	1.2798	0.929	0.951	3.03083e-06	MANF	AS-BN_vs_AS-BP
1.93724e-10	1.77247	0.667	0.41	3.3859e-06	WNT5B	AS-BN_vs_AS-BP
2.02273e-10	1.38363	0.424	0.111	3.53532e-06	SMTN	AS-BN_vs_AS-BP
2.24666e-10	1.00057	0.97	0.988	3.92672e-06	TMEM167A	AS-BN_vs_AS-BP
2.28117e-10	1.04317	0.369	0.111	3.98704e-06	PTGDS	AS-BN_vs_AS-BP
2.62015e-10	2.10548	0.763	0.487	4.57951e-06	LUM	AS-BN_vs_AS-BP
2.65261e-10	1.12929	0.97	0.985	4.63624e-06	MRPL33	AS-BN_vs_AS-BP
2.687e-10	1.15612	0.323	0.142	4.69634e-06	LPAR1	AS-BN_vs_AS-BP
2.71679e-10	0.70445	0.899	0.799	4.7484e-06	PLOD1	AS-BN_vs_AS-BP
2.83508e-10	1.32617	0.409	0.195	4.95516e-06	OLFML3	AS-BN_vs_AS-BP
3.04269e-10	1.12701	1	0.994	5.31801e-06	MARCKS	AS-BN_vs_AS-BP
3.23557e-10	1.35105	0.737	0.746	5.65512e-06	LIMCH1	AS-BN_vs_AS-BP
3.95678e-10	1.53469	0.859	0.646	6.91566e-06	VASP	AS-BN_vs_AS-BP
4.02184e-10	0.297776	0.586	0.891	7.02937e-06	IFT43	AS-BN_vs_AS-BP
4.0697e-10	0.794914	0.753	0.84	7.11302e-06	HNRNPL	AS-BN_vs_AS-BP
4.39255e-10	1.58994	0.439	0.146	7.6773e-06	COL27A1	AS-BN_vs_AS-BP
4.53357e-10	1.63423	0.444	0.185	7.92378e-06	NBL1	AS-BN_vs_AS-BP
4.54706e-10	1.28353	0.737	0.744	7.94735e-06	BTG1	AS-BN_vs_AS-BP
4.80732e-10	0.601994	0.439	0.719	8.40224e-06	SS18L2	AS-BN_vs_AS-BP
4.87806e-10	1.13054	0.657	0.314	8.52587e-06	NDUFA13	AS-BN_vs_AS-BP
5.15209e-10	1.07678	0.631	0.577	9.00483e-06	PDLIM4	AS-BN_vs_AS-BP
5.64759e-10	1.0468	0.641	0.669	9.87086e-06	BCAR3	AS-BN_vs_AS-BP
6.01227e-10	0.506157	0.737	0.732	1.05082e-05	SCRN1	AS-BN_vs_AS-BP
6.0677e-10	0.593782	0.561	0.834	1.06051e-05	COMMD1	AS-BN_vs_AS-BP
7.15556e-10	1.23134	0.778	0.871	1.25065e-05	GNAQ	AS-BN_vs_AS-BP
8.01063e-10	1.33164	0.253	0.102	1.4001e-05	COLEC12	AS-BN_vs_AS-BP
8.08847e-10	0.330328	0.49	0.714	1.4137e-05	ISG15	AS-BN_vs_AS-BP
8.2912e-10	0.53929	0.722	0.602	1.44914e-05	KATNAL1	AS-BN_vs_AS-BP
8.79994e-10	1.08423	0.98	0.996	1.53805e-05	RBX1	AS-BN_vs_AS-BP
8.82127e-10	1.006	0.636	0.778	1.54178e-05	TFDP2	AS-BN_vs_AS-BP
9.86183e-10	1.57212	0.843	0.71	1.72365e-05	SRF	AS-BN_vs_AS-BP
1.00087e-09	1.07934	0.737	0.784	1.74933e-05	JUND	AS-BN_vs_AS-BP
1.20135e-09	0.677987	0.626	0.859	2.09972e-05	GSTM3	AS-BN_vs_AS-BP
1.24329e-09	0.953326	0.434	0.229	2.17303e-05	VAV2	AS-BN_vs_AS-BP
1.2949e-09	1.47765	0.5	0.38	2.26323e-05	CEP85L	AS-BN_vs_AS-BP
1.36449e-09	1.49064	0.99	0.857	2.38486e-05	PTMS	AS-BN_vs_AS-BP
1.39946e-09	1.92471	0.677	0.433	2.44598e-05	CDR2	AS-BN_vs_AS-BP
1.43156e-09	1.24089	0.606	0.355	2.50208e-05	IL32	AS-BN_vs_AS-BP
1.4558e-09	1.11878	0.848	0.771	2.54445e-05	HLA-A	AS-BN_vs_AS-BP
1.4866e-09	1.13553	0.955	0.947	2.59828e-05	SF1	AS-BN_vs_AS-BP
1.50547e-09	0.936042	0.747	0.723	2.63125e-05	GLIS3	AS-BN_vs_AS-BP
1.57473e-09	0.440413	0.545	0.546	2.75232e-05	DAPK3	AS-BN_vs_AS-BP
1.59803e-09	1.5844	0.333	0.092	2.79304e-05	SPHK1	AS-BN_vs_AS-BP
1.7722e-09	1.00242	0.662	0.561	3.09744e-05	BOP1	AS-BN_vs_AS-BP
2.4201e-09	1.49691	0.258	0.068	4.22985e-05	CD274	AS-BN_vs_AS-BP
2.46758e-09	1.41805	0.616	0.473	4.31284e-05	NBEA	AS-BN_vs_AS-BP
2.60974e-09	1.16393	0.965	0.985	4.5613e-05	ENY2	AS-BN_vs_AS-BP
2.69893e-09	0.462486	0.566	0.836	4.71719e-05	COA6	AS-BN_vs_AS-BP
2.71427e-09	1.31027	0.838	0.623	4.74401e-05	PLEC	AS-BN_vs_AS-BP
2.74523e-09	0.992224	0.414	0.466	4.79811e-05	IRS1	AS-BN_vs_AS-BP
3.22886e-09	0.431694	0.646	0.885	5.6434e-05	PTRHD1	AS-BN_vs_AS-BP
3.23696e-09	1.27225	0.258	0.034	5.65757e-05	SEMA7A	AS-BN_vs_AS-BP
3.76481e-09	0.785986	1	0.96	6.58013e-05	MSN	AS-BN_vs_AS-BP
3.95548e-09	1.12072	0.783	0.888	6.91338e-05	TAF1D	AS-BN_vs_AS-BP
4.13734e-09	0.767487	0.965	0.99	7.23125e-05	KTN1	AS-BN_vs_AS-BP
4.41105e-09	1.58947	0.616	0.429	7.70964e-05	MT1X	AS-BN_vs_AS-BP
5.32202e-09	1.52674	0.47	0.287	9.30183e-05	RAB27A	AS-BN_vs_AS-BP
5.51826e-09	0.959657	0.985	0.991	9.64481e-05	CCDC80	AS-BN_vs_AS-BP
5.79109e-09	1.00841	1	1	0.000101217	RPS13	AS-BN_vs_AS-BP
5.8943e-09	0.724055	0.909	0.936	0.000103021	DLG1	AS-BN_vs_AS-BP
7.29886e-09	1.48684	0.283	0.061	0.00012757	POPDC3	AS-BN_vs_AS-BP
7.30571e-09	0.612177	1	1	0.000127689	TTC3	AS-BN_vs_AS-BP
7.64585e-09	0.975854	0.773	0.886	0.000133634	YWHAH	AS-BN_vs_AS-BP
7.76171e-09	1.0789	0.763	0.744	0.000135659	ORAI2	AS-BN_vs_AS-BP
7.80903e-09	0.527118	0.561	0.814	0.000136486	GLRX2	AS-BN_vs_AS-BP
8.06704e-09	1.49376	0.687	0.385	0.000140996	ALYREF	AS-BN_vs_AS-BP
8.40458e-09	1.82738	0.404	0.096	0.000146895	LRRC15	AS-BN_vs_AS-BP
8.47516e-09	1.32773	0.914	0.824	0.000148129	IFI27L2	AS-BN_vs_AS-BP
8.69593e-09	0.603113	0.722	0.91	0.000151987	HMGN3	AS-BN_vs_AS-BP
8.82804e-09	1.59028	0.758	0.759	0.000154296	SMYD3	AS-BN_vs_AS-BP
9.14723e-09	2.02007	0.273	0.178	0.000159875	F3	AS-BN_vs_AS-BP
9.15677e-09	2.27805	0.263	0.074	0.000160042	NPPB	AS-BN_vs_AS-BP
9.27504e-09	1.12275	0.985	0.988	0.000162109	UQCRB	AS-BN_vs_AS-BP
9.54078e-09	0.978698	0.247	0.314	0.000166754	LRRN3	AS-BN_vs_AS-BP
1.06896e-08	1.51363	0.333	0.068	0.000186833	UAP1L1	AS-BN_vs_AS-BP
1.07186e-08	0.510357	0.763	0.928	0.00018734	CHCHD1	AS-BN_vs_AS-BP
1.16928e-08	1.07075	0.328	0.175	0.000204366	MNT	AS-BN_vs_AS-BP
1.17734e-08	1.27102	0.424	0.331	0.000205776	ZC3HAV1	AS-BN_vs_AS-BP
1.26969e-08	0.891734	0.737	0.572	0.000221916	BMP1	AS-BN_vs_AS-BP
1.27325e-08	1.74851	0.288	0.107	0.000222539	ADAMTS1	AS-BN_vs_AS-BP
1.28782e-08	0.827513	0.732	0.747	0.000225085	LRRC8A	AS-BN_vs_AS-BP
1.29028e-08	1.12829	0.318	0.112	0.000225515	THBS2	AS-BN_vs_AS-BP
1.29033e-08	1.02603	0.985	0.994	0.000225524	UQCR10	AS-BN_vs_AS-BP
1.32092e-08	0.841825	0.98	0.988	0.000230871	ACLY	AS-BN_vs_AS-BP
1.42625e-08	1.25772	0.505	0.441	0.00024928	ADGRL2	AS-BN_vs_AS-BP
1.46115e-08	0.547015	0.98	0.997	0.00025538	KIF5B	AS-BN_vs_AS-BP
1.58015e-08	1.37796	0.843	0.694	0.000276178	TENM3	AS-BN_vs_AS-BP
1.67922e-08	1.28871	0.985	0.987	0.000293494	SNRPE	AS-BN_vs_AS-BP
1.74398e-08	2.26108	0.449	0.176	0.000304813	TRIB1	AS-BN_vs_AS-BP
1.74899e-08	1.13254	0.99	0.978	0.000305688	NDUFB4	AS-BN_vs_AS-BP
1.9009e-08	1.68599	0.636	0.425	0.000332239	METRNL	AS-BN_vs_AS-BP
1.91349e-08	1.16274	0.848	0.737	0.000334439	MYOF	AS-BN_vs_AS-BP
2.03222e-08	0.267572	0.247	0.615	0.000355192	LYSET	AS-BN_vs_AS-BP
2.23077e-08	1.18289	0.253	0.062	0.000389895	POU2F2	AS-BN_vs_AS-BP
2.27234e-08	0.943302	0.48	0.604	0.000397159	SMAD1	AS-BN_vs_AS-BP
2.33533e-08	1.2687	0.97	0.991	0.000408169	NDUFB2	AS-BN_vs_AS-BP
2.40581e-08	1.05034	0.929	0.92	0.000420488	PTPN14	AS-BN_vs_AS-BP
2.46417e-08	1.02547	1	1	0.000430687	RPL41	AS-BN_vs_AS-BP
2.55173e-08	0.988173	1	0.996	0.000445992	COX7B	AS-BN_vs_AS-BP
2.78212e-08	0.810678	0.874	0.861	0.00048626	CHPF	AS-BN_vs_AS-BP
2.84502e-08	1.12977	0.879	0.905	0.000497253	YY1	AS-BN_vs_AS-BP
2.84714e-08	0.860128	0.561	0.501	0.000497622	IGF2BP1	AS-BN_vs_AS-BP
2.96235e-08	1.22588	0.773	0.72	0.000517759	CCND3	AS-BN_vs_AS-BP
2.99493e-08	0.617031	0.359	0.278	0.000523454	RANBP17	AS-BN_vs_AS-BP
3.05655e-08	0.936955	0.753	0.855	0.000534223	ROCK1	AS-BN_vs_AS-BP
3.15884e-08	1.78874	0.662	0.393	0.000552102	GASK1B	AS-BN_vs_AS-BP
3.16613e-08	1.00819	0.652	0.716	0.000553376	RAB32	AS-BN_vs_AS-BP
3.35165e-08	0.738479	0.702	0.861	0.000585802	CMTM3	AS-BN_vs_AS-BP
3.38174e-08	1.47839	0.803	0.429	0.00059106	PDE4D	AS-BN_vs_AS-BP
3.91715e-08	1.00589	1	1	0.000684639	TPM4	AS-BN_vs_AS-BP
3.94744e-08	1.22167	0.955	0.96	0.000689933	SNRPB2	AS-BN_vs_AS-BP
4.01214e-08	1.28099	0.939	0.901	0.000701243	SELENOM	AS-BN_vs_AS-BP
4.41211e-08	0.883884	1	1	0.000771149	PPIA	AS-BN_vs_AS-BP
4.54288e-08	0.608537	0.869	0.899	0.000794004	FKBP10	AS-BN_vs_AS-BP
4.56804e-08	0.448334	0.419	0.704	0.000798402	TPRKB	AS-BN_vs_AS-BP
4.85612e-08	1.51602	0.384	0.185	0.000848753	IRX2	AS-BN_vs_AS-BP
4.9469e-08	1.18945	0.303	0.2	0.00086462	PRTG	AS-BN_vs_AS-BP
5.30231e-08	0.459776	0.687	0.917	0.000926738	ORMDL2	AS-BN_vs_AS-BP
5.79101e-08	0.357278	0.773	0.954	0.00101215	MAPK1	AS-BN_vs_AS-BP
6.25723e-08	1.35809	0.535	0.365	0.00109364	SERPINF1	AS-BN_vs_AS-BP
6.28302e-08	1.11891	0.374	0.487	0.00109815	RBM27	AS-BN_vs_AS-BP
6.49088e-08	1.63085	0.333	0.24	0.00113448	VSTM4	AS-BN_vs_AS-BP
6.63412e-08	1.05587	0.288	0.231	0.00115951	GUCY1A2	AS-BN_vs_AS-BP
6.99465e-08	0.603757	0.742	0.796	0.00122253	AMPD2	AS-BN_vs_AS-BP
7.24071e-08	0.332928	0.515	0.854	0.00126553	BOD1	AS-BN_vs_AS-BP
7.37673e-08	0.298605	0.561	0.855	0.0012893	PTRH2	AS-BN_vs_AS-BP
8.2169e-08	0.894536	0.995	0.99	0.00143615	RPL26	AS-BN_vs_AS-BP
8.22133e-08	1.69531	0.884	0.902	0.00143692	COL5A2	AS-BN_vs_AS-BP
8.54518e-08	1.02713	0.939	0.978	0.00149353	SF3B6	AS-BN_vs_AS-BP
8.61869e-08	1.58545	0.596	0.398	0.00150637	MOXD1	AS-BN_vs_AS-BP
1.02198e-07	1.41501	0.253	0.09	0.00178622	PCDH19	AS-BN_vs_AS-BP
1.09016e-07	1.03235	0.278	0.339	0.00190538	ARPC1B	AS-BN_vs_AS-BP
1.11727e-07	1.21361	0.758	0.775	0.00195276	OXSR1	AS-BN_vs_AS-BP
1.1386e-07	1.17914	1	0.988	0.00199004	COX6C	AS-BN_vs_AS-BP
1.22468e-07	0.667483	0.859	0.938	0.0021405	LMAN1	AS-BN_vs_AS-BP
1.23932e-07	1.02356	0.783	0.772	0.00216608	BZW2	AS-BN_vs_AS-BP
1.2692e-07	1.58607	0.268	0.096	0.0022183	COL15A1	AS-BN_vs_AS-BP
1.27191e-07	0.277022	0.449	0.794	0.00222305	FAM104B	AS-BN_vs_AS-BP
1.2774e-07	0.25984	0.641	0.898	0.00223264	COMMD3	AS-BN_vs_AS-BP
1.29058e-07	1.32549	0.939	0.913	0.00225567	SFPQ	AS-BN_vs_AS-BP
1.31047e-07	1.58997	0.298	0.105	0.00229044	CD109	AS-BN_vs_AS-BP
1.36041e-07	0.594649	0.601	0.873	0.00237773	WASHC3	AS-BN_vs_AS-BP
1.45006e-07	1.38138	0.722	0.568	0.00253441	PHLDA3	AS-BN_vs_AS-BP
1.45617e-07	2.06729	0.505	0.293	0.0025451	RASGRF2	AS-BN_vs_AS-BP
1.46767e-07	0.591759	0.854	0.893	0.0025652	MT2A	AS-BN_vs_AS-BP
1.51252e-07	1.05878	0.677	0.685	0.00264358	UCK2	AS-BN_vs_AS-BP
1.57997e-07	1.48955	0.374	0.182	0.00276147	PCDH17	AS-BN_vs_AS-BP
1.62031e-07	0.634503	0.389	0.317	0.00283197	GYPC	AS-BN_vs_AS-BP
1.6427e-07	0.639597	0.515	0.626	0.00287111	LRRC58	AS-BN_vs_AS-BP
1.64779e-07	0.767212	0.889	0.92	0.00288001	INSIG1	AS-BN_vs_AS-BP
1.67679e-07	0.893683	0.727	0.533	0.00293069	LAMB2	AS-BN_vs_AS-BP
1.88748e-07	0.476153	0.646	0.91	0.00329894	AK6	AS-BN_vs_AS-BP
1.92271e-07	0.980326	0.965	0.987	0.0033605	ATP5PD	AS-BN_vs_AS-BP
1.99086e-07	0.331531	0.47	0.79	0.00347962	RANBP9	AS-BN_vs_AS-BP
1.99246e-07	0.580078	0.278	0.558	0.00348242	ADO	AS-BN_vs_AS-BP
2.02103e-07	0.319647	0.606	0.888	0.00353236	POLR2H	AS-BN_vs_AS-BP
2.10506e-07	1.49509	0.253	0.104	0.00367923	ENPP1	AS-BN_vs_AS-BP
2.22335e-07	1.14276	0.803	0.874	0.00388597	ACBD3	AS-BN_vs_AS-BP
2.38916e-07	0.970871	1	1	0.00417578	RPL31	AS-BN_vs_AS-BP
2.39988e-07	0.670335	0.419	0.661	0.00419451	MAP2K1	AS-BN_vs_AS-BP
2.4302e-07	1.35404	0.576	0.456	0.0042475	MMP16	AS-BN_vs_AS-BP
2.459e-07	1.06684	0.919	0.966	0.00429784	PET100	AS-BN_vs_AS-BP
2.48547e-07	1.47749	0.389	0.115	0.0043441	MYRF	AS-BN_vs_AS-BP
2.54995e-07	0.92112	1	1	0.00445679	RPL21	AS-BN_vs_AS-BP
2.55126e-07	0.807261	0.838	0.935	0.0044591	KPNA4	AS-BN_vs_AS-BP
2.73921e-07	1.32198	0.444	0.274	0.00478759	CHST14	AS-BN_vs_AS-BP
2.82244e-07	0.903409	0.379	0.462	0.00493306	LGALS3	AS-BN_vs_AS-BP
2.82986e-07	0.97077	0.652	0.432	0.00494603	SNRNP70	AS-BN_vs_AS-BP
3.06694e-07	0.61883	0.904	0.882	0.0053604	MYO1C	AS-BN_vs_AS-BP
3.2082e-07	0.783132	0.273	0.423	0.00560729	STRN	AS-BN_vs_AS-BP
3.23159e-07	0.423818	0.778	0.777	0.00564818	ANKRD52	AS-BN_vs_AS-BP
3.31273e-07	1.09672	0.631	0.5	0.00578999	LDB1	AS-BN_vs_AS-BP
3.42405e-07	0.459988	0.515	0.754	0.00598456	HACD2	AS-BN_vs_AS-BP
3.6437e-07	0.964187	0.455	0.259	0.00636847	ZBTB7A	AS-BN_vs_AS-BP
4.33526e-07	0.902382	0.626	0.678	0.00757717	JADE1	AS-BN_vs_AS-BP
4.60693e-07	0.84579	0.808	0.891	0.00805199	DEK	AS-BN_vs_AS-BP
4.67529e-07	0.328032	0.596	0.892	0.00817147	EMG1	AS-BN_vs_AS-BP
4.72465e-07	0.363871	0.823	0.973	0.00825775	VPS29	AS-BN_vs_AS-BP
4.90888e-07	0.575172	0.485	0.717	0.00857974	MCUR1	AS-BN_vs_AS-BP
4.95768e-07	1.05285	0.273	0.145	0.00866503	PLXNA2	AS-BN_vs_AS-BP
5.34619e-07	1.34203	0.308	0.148	0.00934407	AQP1	AS-BN_vs_AS-BP
5.42726e-07	0.331347	0.879	0.981	0.00948577	MRPL20	AS-BN_vs_AS-BP
5.46105e-07	0.304654	0.495	0.825	0.00954483	TBPL1	AS-BN_vs_AS-BP
5.63288e-07	0.803654	0.672	0.689	0.00984514	JUN	AS-BN_vs_AS-BP
5.71786e-07	0.854313	0.263	0.254	0.00999367	PSRC1	AS-BN_vs_AS-BP
5.71905e-07	1.37853	0.379	0.256	0.00999575	C2CD2	AS-BN_vs_AS-BP
5.88622e-07	0.581653	0.924	0.96	0.0102879	WASF2	AS-BN_vs_AS-BP
6.03465e-07	1.71772	0.439	0.312	0.0105474	IGSF3	AS-BN_vs_AS-BP
6.27186e-07	1.02236	1	0.999	0.010962	RPLP2	AS-BN_vs_AS-BP
6.57553e-07	1.27684	0.374	0.254	0.0114927	RXRA	AS-BN_vs_AS-BP
7.80403e-07	1.50172	0.5	0.186	0.0136399	JPH2	AS-BN_vs_AS-BP
8.35168e-07	0.9325	0.995	0.993	0.0145971	SON	AS-BN_vs_AS-BP
8.87389e-07	1.04846	0.965	0.945	0.0155098	CDC42EP3	AS-BN_vs_AS-BP
8.97924e-07	0.851774	0.253	0.182	0.0156939	NEFM	AS-BN_vs_AS-BP
9.03734e-07	0.791714	0.778	0.893	0.0157955	SLC7A1	AS-BN_vs_AS-BP
9.1273e-07	1.23765	0.97	0.97	0.0159527	MTDH	AS-BN_vs_AS-BP
9.34948e-07	0.271939	0.894	0.981	0.016341	ARL3	AS-BN_vs_AS-BP
9.46412e-07	0.687895	0.778	0.922	0.0165414	SRSF2	AS-BN_vs_AS-BP
9.61854e-07	1.30997	0.46	0.379	0.0168113	PORCN	AS-BN_vs_AS-BP
9.90587e-07	1.04716	0.682	0.737	0.0173135	IKBIP	AS-BN_vs_AS-BP
1.02451e-06	1.21578	0.424	0.38	0.0179065	HHAT	AS-BN_vs_AS-BP
1.04315e-06	0.345979	0.646	0.879	0.0182321	POLE4	AS-BN_vs_AS-BP
1.04776e-06	0.529874	0.374	0.559	0.0183128	SHB	AS-BN_vs_AS-BP
1.09751e-06	1.45354	0.5	0.283	0.0191822	NHERF2	AS-BN_vs_AS-BP
1.10511e-06	0.893923	0.313	0.234	0.0193151	TLCD2	AS-BN_vs_AS-BP
1.13059e-06	1.21894	0.5	0.405	0.0197605	SMC4	AS-BN_vs_AS-BP
1.17991e-06	0.257148	0.758	0.953	0.0206225	POLR1D	AS-BN_vs_AS-BP
1.24223e-06	1.12532	0.914	0.815	0.0217117	GOLGA2	AS-BN_vs_AS-BP
1.24923e-06	1.87306	0.894	0.632	0.021834	HES1	AS-BN_vs_AS-BP
1.29754e-06	1.25733	1	0.988	0.0226785	RPS21	AS-BN_vs_AS-BP
1.32862e-06	0.677001	0.626	0.82	0.0232216	TMEM141	AS-BN_vs_AS-BP
1.33919e-06	0.543102	0.763	0.751	0.0234063	MAVS	AS-BN_vs_AS-BP
1.34349e-06	0.881124	0.586	0.689	0.0234816	RNPEP	AS-BN_vs_AS-BP
1.37389e-06	0.511338	0.874	0.929	0.0240129	KCTD10	AS-BN_vs_AS-BP
1.41462e-06	0.948642	0.848	0.854	0.0247247	CCDC50	AS-BN_vs_AS-BP
1.43152e-06	1.32951	0.556	0.444	0.0250201	MAFG	AS-BN_vs_AS-BP
1.45723e-06	1.45767	0.273	0.145	0.0254695	E2F7	AS-BN_vs_AS-BP
1.47008e-06	1.27901	0.732	0.608	0.025694	ZFHX4	AS-BN_vs_AS-BP
1.50768e-06	0.854308	0.843	0.874	0.0263513	HNRNPUL1	AS-BN_vs_AS-BP
1.51598e-06	0.400426	0.803	0.962	0.0264963	CAND1	AS-BN_vs_AS-BP
1.52286e-06	1.00797	0.556	0.572	0.0266166	GAP43	AS-BN_vs_AS-BP
1.53368e-06	0.517275	0.581	0.818	0.0268056	MRPS18C	AS-BN_vs_AS-BP
1.53515e-06	0.339841	0.712	0.929	0.0268313	POP5	AS-BN_vs_AS-BP
1.54686e-06	1.05374	0.677	0.609	0.0270361	NRP1	AS-BN_vs_AS-BP
1.60422e-06	0.367715	0.586	0.845	0.0280385	KRT10	AS-BN_vs_AS-BP
1.63997e-06	0.894449	0.333	0.198	0.0286635	EFHD2	AS-BN_vs_AS-BP
1.67796e-06	1.02635	1	0.997	0.0293274	COX7C	AS-BN_vs_AS-BP
1.70808e-06	1.03093	0.763	0.729	0.0298538	MBOAT2	AS-BN_vs_AS-BP
1.72091e-06	0.289512	0.838	0.966	0.030078	POLR2I	AS-BN_vs_AS-BP
1.78347e-06	0.862181	0.369	0.291	0.0311715	CMTM7	AS-BN_vs_AS-BP
1.80178e-06	0.368217	0.525	0.834	0.0314916	CMAS	AS-BN_vs_AS-BP
1.82091e-06	0.3706	0.268	0.611	0.0318258	C3orf14	AS-BN_vs_AS-BP
1.86494e-06	1.10353	0.707	0.636	0.0325954	AFDN	AS-BN_vs_AS-BP
1.87814e-06	1.10839	1	1	0.0328262	NDUFS5	AS-BN_vs_AS-BP
1.8867e-06	1.42104	0.495	0.442	0.0329757	EVL	AS-BN_vs_AS-BP
1.88694e-06	1.35253	0.848	0.812	0.0329799	PPP1R18	AS-BN_vs_AS-BP
1.89082e-06	0.560551	0.909	0.984	0.0330478	PON2	AS-BN_vs_AS-BP
1.90637e-06	0.258874	0.535	0.815	0.0333196	MTIF3	AS-BN_vs_AS-BP
1.94489e-06	0.954977	0.995	0.999	0.0339928	UQCRQ	AS-BN_vs_AS-BP
1.96829e-06	1.32691	0.303	0.271	0.0344017	RORA	AS-BN_vs_AS-BP
2.03409e-06	0.887849	0.258	0.112	0.0355519	SPON2	AS-BN_vs_AS-BP
2.05895e-06	1.115	0.667	0.507	0.0359863	MVP	AS-BN_vs_AS-BP
2.2576e-06	0.260807	0.449	0.714	0.0394583	PIP4P1	AS-BN_vs_AS-BP
2.26204e-06	1.2788	0.369	0.24	0.0395359	TAFA5	AS-BN_vs_AS-BP
2.28442e-06	0.409006	0.985	0.99	0.039927	FNDC3B	AS-BN_vs_AS-BP
2.29559e-06	1.41885	0.975	0.928	0.0401222	NT5DC2	AS-BN_vs_AS-BP
2.30674e-06	0.786299	0.687	0.861	0.0403173	CTDNEP1	AS-BN_vs_AS-BP
2.32094e-06	0.27478	0.566	0.828	0.0405655	AAMDC	AS-BN_vs_AS-BP
2.43601e-06	0.621505	0.682	0.893	0.0425766	FAM229B	AS-BN_vs_AS-BP
2.49041e-06	1.12469	0.712	0.818	0.0435274	FKBP7	AS-BN_vs_AS-BP
2.55585e-06	0.645269	0.682	0.809	0.0446712	SREBF2	AS-BN_vs_AS-BP
2.56869e-06	1.28818	0.591	0.561	0.0448955	BAZ1A	AS-BN_vs_AS-BP
2.61699e-06	1.66835	0.793	0.524	0.0457397	MARVELD1	AS-BN_vs_AS-BP
2.66042e-06	0.770828	0.485	0.652	0.0464989	CCNK	AS-BN_vs_AS-BP
2.66137e-06	0.701407	0.803	0.797	0.0465155	TSPAN14	AS-BN_vs_AS-BP
2.75629e-06	1.53996	0.5	0.417	0.0481744	CHMP4B	AS-BN_vs_AS-BP
2.94058e-06	1.38213	0.611	0.497	0.0513954	CELSR1	AS-BN_vs_AS-BP
2.97794e-06	0.47069	0.848	0.969	0.0520484	DPY30	AS-BN_vs_AS-BP
3.06933e-06	0.996603	0.889	0.892	0.0536457	LRP10	AS-BN_vs_AS-BP
3.17736e-06	0.895936	0.783	0.824	0.0555338	TGFBR1	AS-BN_vs_AS-BP
3.21657e-06	0.947826	0.899	0.959	0.0562193	LSM3	AS-BN_vs_AS-BP
3.24252e-06	0.580613	0.621	0.703	0.0566728	SERTAD2	AS-BN_vs_AS-BP
3.34907e-06	0.882524	0.949	0.967	0.0585351	TENM2	AS-BN_vs_AS-BP
3.37091e-06	1.06031	0.328	0.112	0.0589167	HSPG2	AS-BN_vs_AS-BP
3.38286e-06	0.990512	0.859	0.849	0.0591255	MYO1B	AS-BN_vs_AS-BP
3.43216e-06	1.14252	0.672	0.756	0.0599874	COX17	AS-BN_vs_AS-BP
3.50167e-06	0.939125	0.419	0.277	0.0612022	NCKAP5L	AS-BN_vs_AS-BP
3.50747e-06	1.25733	0.394	0.225	0.0613035	INAFM1	AS-BN_vs_AS-BP
3.51358e-06	0.47921	0.455	0.669	0.0614104	ANKRD13A	AS-BN_vs_AS-BP
3.52215e-06	0.841266	0.303	0.08	0.0615602	SCARF2	AS-BN_vs_AS-BP
3.59319e-06	0.976648	0.672	0.676	0.0628018	VHL	AS-BN_vs_AS-BP
3.6484e-06	1.21411	0.505	0.599	0.0637667	RPA3	AS-BN_vs_AS-BP
3.67074e-06	0.651065	0.742	0.885	0.0641572	YTHDC1	AS-BN_vs_AS-BP
3.67681e-06	1.28248	0.394	0.334	0.0642633	KLF13	AS-BN_vs_AS-BP
3.71026e-06	1.16544	0.53	0.58	0.064848	TAOK3	AS-BN_vs_AS-BP
3.73081e-06	1.18066	0.566	0.528	0.0652071	IQSEC1	AS-BN_vs_AS-BP
3.75446e-06	0.284622	0.591	0.857	0.0656205	PPP3CB	AS-BN_vs_AS-BP
3.78927e-06	0.801076	0.869	0.923	0.0662288	UBE3A	AS-BN_vs_AS-BP
3.91771e-06	0.38137	0.793	0.954	0.0684738	CMC2	AS-BN_vs_AS-BP
3.92025e-06	1.63596	0.419	0.241	0.0685181	SERTAD4	AS-BN_vs_AS-BP
3.9749e-06	1.30815	0.54	0.402	0.0694734	ROBO1	AS-BN_vs_AS-BP
4.11997e-06	1.13175	0.54	0.57	0.0720089	SNX7	AS-BN_vs_AS-BP
4.18258e-06	1.55281	0.404	0.183	0.0731031	ADAMTS14	AS-BN_vs_AS-BP
4.23189e-06	0.964755	0.848	0.898	0.0739649	PFDN2	AS-BN_vs_AS-BP
4.27571e-06	0.689237	0.53	0.493	0.0747309	LIMK1	AS-BN_vs_AS-BP
4.47698e-06	0.263138	0.803	0.941	0.0782486	RAD23B	AS-BN_vs_AS-BP
4.48643e-06	0.395166	0.535	0.751	0.0784137	ABRACL	AS-BN_vs_AS-BP
4.55844e-06	0.497439	0.318	0.231	0.0796724	HOMER3	AS-BN_vs_AS-BP
4.56172e-06	1.03897	0.96	0.951	0.0797297	ZFAND5	AS-BN_vs_AS-BP
4.65074e-06	1.14449	0.308	0.123	0.0812856	ENG	AS-BN_vs_AS-BP
4.78488e-06	0.352275	0.313	0.531	0.0836301	S100A2	AS-BN_vs_AS-BP
4.81611e-06	1.88805	0.571	0.286	0.084176	FMNL3	AS-BN_vs_AS-BP
4.95728e-06	0.356134	0.505	0.802	0.0866434	DCAF8	AS-BN_vs_AS-BP
4.97845e-06	0.772958	0.995	0.99	0.0870133	UQCR11	AS-BN_vs_AS-BP
5.06045e-06	0.645869	0.449	0.379	0.0884465	SF3A2	AS-BN_vs_AS-BP
5.07429e-06	0.744897	0.596	0.808	0.0886885	ARMCX2	AS-BN_vs_AS-BP
5.11538e-06	1.41318	0.838	0.824	0.0894066	C5orf46	AS-BN_vs_AS-BP
5.15208e-06	1.22974	0.253	0.071	0.0900481	CLMP	AS-BN_vs_AS-BP
5.17231e-06	1.11481	0.268	0.336	0.0904017	RNF103	AS-BN_vs_AS-BP
5.2212e-06	0.857776	0.763	0.817	0.0912561	PHF23	AS-BN_vs_AS-BP
5.23555e-06	1.06309	0.5	0.599	0.091507	GLRX5	AS-BN_vs_AS-BP
5.25879e-06	0.968143	0.48	0.441	0.0919132	RAB11FIP5	AS-BN_vs_AS-BP
5.29319e-06	1.83257	0.798	0.512	0.0925143	IFFO2	AS-BN_vs_AS-BP
5.40532e-06	0.860177	0.268	0.241	0.0944742	ADD2	AS-BN_vs_AS-BP
5.42033e-06	0.430846	0.894	0.973	0.0947364	NDUFS4	AS-BN_vs_AS-BP
5.42102e-06	0.795726	0.864	0.944	0.0947486	TERF2IP	AS-BN_vs_AS-BP
5.52121e-06	0.711861	0.303	0.504	0.0964997	ACYP1	AS-BN_vs_AS-BP
5.55312e-06	1.73943	0.333	0.204	0.0970574	KCNMB4	AS-BN_vs_AS-BP
5.6914e-06	0.78527	1	1	0.0994743	RPL23A	AS-BN_vs_AS-BP
5.70592e-06	1.13863	0.551	0.476	0.099728	PDGFA	AS-BN_vs_AS-BP
5.80783e-06	0.696044	1	1	0.101509	RPS2	AS-BN_vs_AS-BP
6.05946e-06	0.684738	0.808	0.926	0.105907	RANBP2	AS-BN_vs_AS-BP
6.24107e-06	0.987846	0.682	0.66	0.109081	UBXN2A	AS-BN_vs_AS-BP
6.34259e-06	1.39347	0.646	0.605	0.110856	NOTCH3	AS-BN_vs_AS-BP
6.45207e-06	0.506934	0.773	0.922	0.112769	THOC7	AS-BN_vs_AS-BP
6.60841e-06	0.549286	0.793	0.809	0.115502	GTF2F1	AS-BN_vs_AS-BP
6.7974e-06	0.39885	0.793	0.905	0.118805	LASP1	AS-BN_vs_AS-BP
6.82896e-06	1.16106	1	0.996	0.119357	TOMM7	AS-BN_vs_AS-BP
6.99187e-06	1.0658	0.566	0.531	0.122204	NIBAN2	AS-BN_vs_AS-BP
7.13812e-06	1.41523	0.495	0.286	0.12476	ITPRIPL2	AS-BN_vs_AS-BP
7.14731e-06	0.339089	0.818	0.96	0.124921	LAMTOR2	AS-BN_vs_AS-BP
7.29759e-06	0.586342	0.949	0.99	0.127547	RAB2A	AS-BN_vs_AS-BP
7.62302e-06	1.44431	0.939	0.895	0.133235	LAMP1	AS-BN_vs_AS-BP
7.77712e-06	1.3286	0.788	0.654	0.135928	GPC1	AS-BN_vs_AS-BP
7.90426e-06	0.92816	0.303	0.139	0.138151	ADGRB2	AS-BN_vs_AS-BP
7.94794e-06	0.690125	0.687	0.75	0.138914	TSKU	AS-BN_vs_AS-BP
8.01976e-06	1.40751	0.475	0.411	0.140169	THUMPD2	AS-BN_vs_AS-BP
8.02819e-06	0.781252	0.545	0.571	0.140317	GYS1	AS-BN_vs_AS-BP
8.13452e-06	0.976383	0.879	0.895	0.142175	FBLIM1	AS-BN_vs_AS-BP
8.18853e-06	1.80296	0.273	0.127	0.143119	EDNRA	AS-BN_vs_AS-BP
8.48994e-06	0.590591	0.667	0.889	0.148387	PNISR	AS-BN_vs_AS-BP
8.58524e-06	1.17325	0.444	0.33	0.150053	ST8SIA2	AS-BN_vs_AS-BP
8.69262e-06	1.23292	0.869	0.796	0.15193	TMEM256	AS-BN_vs_AS-BP
8.84733e-06	1.54464	0.338	0.167	0.154634	PDE4B	AS-BN_vs_AS-BP
9.17683e-06	0.802302	0.747	0.854	0.160393	MAP3K13	AS-BN_vs_AS-BP
9.48833e-06	0.485662	1	1	0.165837	RPL9	AS-BN_vs_AS-BP
9.65505e-06	0.666889	0.247	0.536	0.168751	BMI1	AS-BN_vs_AS-BP
9.79949e-06	0.955987	0.965	0.988	0.171275	COL11A1	AS-BN_vs_AS-BP
9.80842e-06	0.55158	0.278	0.21	0.171432	FKBP5	AS-BN_vs_AS-BP
9.81017e-06	0.832971	0.288	0.115	0.171462	STARD10	AS-BN_vs_AS-BP
9.82835e-06	0.305236	0.652	0.8	0.17178	FTSJ1	AS-BN_vs_AS-BP
9.99527e-06	0.689415	0.677	0.692	0.174697	WWC2	AS-BN_vs_AS-BP
1.02364e-05	0.837311	0.798	0.888	0.178911	YBX3	AS-BN_vs_AS-BP
1.02919e-05	0.274803	0.571	0.806	0.179882	ALKBH5	AS-BN_vs_AS-BP
1.03062e-05	0.811133	0.606	0.731	0.180133	PNRC1	AS-BN_vs_AS-BP
1.07771e-05	0.611438	0.268	0.345	0.188363	SLC25A28	AS-BN_vs_AS-BP
1.08524e-05	0.686902	0.859	0.928	0.189677	SMARCC1	AS-BN_vs_AS-BP
1.08855e-05	0.747982	0.323	0.309	0.190256	DSEL	AS-BN_vs_AS-BP
1.11558e-05	0.886948	0.288	0.209	0.194981	CDON	AS-BN_vs_AS-BP
1.11767e-05	0.719464	0.753	0.703	0.195347	TFE3	AS-BN_vs_AS-BP
1.11808e-05	1.03845	0.626	0.675	0.195419	BAG3	AS-BN_vs_AS-BP
1.14823e-05	0.726067	0.818	0.849	0.200688	GOLIM4	AS-BN_vs_AS-BP
1.17204e-05	1.15309	0.354	0.271	0.204849	MAST4	AS-BN_vs_AS-BP
1.19139e-05	0.958351	0.455	0.348	0.208232	LZTR1	AS-BN_vs_AS-BP
1.20132e-05	1.14602	0.328	0.274	0.209966	CYTH1	AS-BN_vs_AS-BP
1.24575e-05	1.24622	0.985	0.982	0.217732	COMMD6	AS-BN_vs_AS-BP
1.24807e-05	1.68016	0.424	0.367	0.218138	DACT1	AS-BN_vs_AS-BP
1.27473e-05	0.954223	0.753	0.825	0.222797	TRIM2	AS-BN_vs_AS-BP
1.28209e-05	0.767859	0.439	0.672	0.224084	LRRC47	AS-BN_vs_AS-BP
1.28774e-05	0.978243	0.914	0.864	0.225071	MLEC	AS-BN_vs_AS-BP
1.35953e-05	0.427147	0.616	0.83	0.237619	SUCO	AS-BN_vs_AS-BP
1.36508e-05	0.858112	0.97	0.973	0.238588	CBX3	AS-BN_vs_AS-BP
1.39262e-05	0.717582	0.737	0.818	0.243402	ACIN1	AS-BN_vs_AS-BP
1.43666e-05	0.853588	0.465	0.462	0.2511	UBTD1	AS-BN_vs_AS-BP
1.46316e-05	0.76542	0.899	0.873	0.255731	COPG1	AS-BN_vs_AS-BP
1.46528e-05	0.32318	0.712	0.882	0.256101	KCMF1	AS-BN_vs_AS-BP
1.50464e-05	1.18201	0.409	0.256	0.262982	JUNB	AS-BN_vs_AS-BP
1.50534e-05	0.408626	0.818	0.848	0.263103	PTK2	AS-BN_vs_AS-BP
1.52183e-05	0.525209	0.803	0.871	0.265986	KDM5A	AS-BN_vs_AS-BP
1.53564e-05	1.13877	0.556	0.624	0.2684	HACD1	AS-BN_vs_AS-BP
1.53671e-05	0.891902	0.394	0.336	0.268587	BIN1	AS-BN_vs_AS-BP
1.53882e-05	0.313217	0.626	0.889	0.268956	PSMG1	AS-BN_vs_AS-BP
1.58956e-05	1.20789	0.646	0.42	0.277824	ECM1	AS-BN_vs_AS-BP
1.5985e-05	0.73602	0.894	0.964	0.279386	DMAC1	AS-BN_vs_AS-BP
1.60504e-05	0.989788	1	1	0.280529	RPLP1	AS-BN_vs_AS-BP
1.60786e-05	0.321732	0.909	0.97	0.281021	C19orf53	AS-BN_vs_AS-BP
1.61201e-05	1.70752	0.939	0.759	0.281746	NES	AS-BN_vs_AS-BP
1.62859e-05	1.20499	0.278	0.143	0.284645	KIAA1549L	AS-BN_vs_AS-BP
1.63954e-05	2.05314	0.843	0.507	0.286558	TPM2	AS-BN_vs_AS-BP
1.69647e-05	0.672041	0.949	0.97	0.296509	SEC62	AS-BN_vs_AS-BP
1.70779e-05	1.04697	0.919	0.956	0.298488	NAA38	AS-BN_vs_AS-BP
1.7198e-05	0.770124	0.465	0.67	0.300587	CMC1	AS-BN_vs_AS-BP
1.72163e-05	0.576167	0.934	0.988	0.300906	NDUFA6	AS-BN_vs_AS-BP
1.72802e-05	0.862718	0.894	0.948	0.302023	KHDRBS1	AS-BN_vs_AS-BP
1.73385e-05	0.346847	0.662	0.713	0.303042	PLXNB2	AS-BN_vs_AS-BP
1.76992e-05	0.690919	0.384	0.584	0.309346	OTUD7B	AS-BN_vs_AS-BP
1.77984e-05	0.288256	0.717	0.876	0.31108	TUBGCP2	AS-BN_vs_AS-BP
1.78811e-05	0.969389	0.742	0.849	0.312526	PIN4	AS-BN_vs_AS-BP
1.79815e-05	0.779141	0.828	0.895	0.31428	ARGLU1	AS-BN_vs_AS-BP
1.79899e-05	1.20854	0.313	0.25	0.314428	MDFIC	AS-BN_vs_AS-BP
1.83941e-05	0.882386	0.697	0.777	0.321492	SMURF2	AS-BN_vs_AS-BP
1.84242e-05	0.715464	0.505	0.698	0.322018	TMBIM4	AS-BN_vs_AS-BP
1.85966e-05	0.869515	0.298	0.291	0.325031	INA	AS-BN_vs_AS-BP
1.86872e-05	1.21338	0.581	0.633	0.326615	PURB	AS-BN_vs_AS-BP
1.87313e-05	0.571382	0.141	0.259	0.327386	S100A4	AS-BN_vs_AS-BP
1.95695e-05	0.746645	0.48	0.411	0.342035	FHIP2B	AS-BN_vs_AS-BP
1.96211e-05	0.371493	0.697	0.883	0.342937	STRN3	AS-BN_vs_AS-BP
1.96769e-05	1.04759	0.646	0.768	0.343913	HDGFL3	AS-BN_vs_AS-BP
2.00792e-05	1.12828	0.646	0.45	0.350944	PLXNA3	AS-BN_vs_AS-BP
2.00799e-05	1.19483	0.525	0.345	0.350956	NFATC4	AS-BN_vs_AS-BP
2.01091e-05	0.72202	0.727	0.712	0.351467	FARP1	AS-BN_vs_AS-BP
2.02987e-05	0.709913	0.646	0.749	0.354781	RECK	AS-BN_vs_AS-BP
2.03131e-05	0.271837	0.414	0.679	0.355032	RNF220	AS-BN_vs_AS-BP
2.03198e-05	0.93974	0.909	0.93	0.35515	FOSL2	AS-BN_vs_AS-BP
2.03199e-05	1.1362	0.747	0.598	0.355152	RERE	AS-BN_vs_AS-BP
2.03997e-05	0.598162	0.798	0.904	0.356546	FOXN3	AS-BN_vs_AS-BP
2.04596e-05	0.557266	0.53	0.651	0.357592	ARHGAP17	AS-BN_vs_AS-BP
2.06384e-05	0.729842	0.914	0.985	0.360718	SNRPD1	AS-BN_vs_AS-BP
2.10804e-05	1.13864	0.737	0.831	0.368443	IRS2	AS-BN_vs_AS-BP
2.11919e-05	0.825702	0.278	0.367	0.370392	BLOC1S4	AS-BN_vs_AS-BP
2.13981e-05	0.685205	0.49	0.614	0.373996	SH3BGRL2	AS-BN_vs_AS-BP
2.19072e-05	1.06664	0.535	0.564	0.382894	FAM133B	AS-BN_vs_AS-BP
2.20341e-05	0.957442	0.409	0.391	0.385111	VASN	AS-BN_vs_AS-BP
2.29138e-05	0.536664	0.414	0.574	0.400487	CDKN1B	AS-BN_vs_AS-BP
2.34688e-05	1.00105	0.47	0.361	0.410187	AHDC1	AS-BN_vs_AS-BP
2.36498e-05	1.44503	0.47	0.287	0.413351	PLEKHA2	AS-BN_vs_AS-BP
2.3698e-05	0.854547	0.273	0.114	0.414193	SNAI1	AS-BN_vs_AS-BP
2.3864e-05	0.640333	0.798	0.892	0.417095	HOOK3	AS-BN_vs_AS-BP
2.42769e-05	0.254226	0.914	0.991	0.424312	ARPC4	AS-BN_vs_AS-BP
2.43794e-05	1.60357	0.702	0.581	0.426103	MTCL1	AS-BN_vs_AS-BP
2.45704e-05	0.252734	0.631	0.842	0.429442	PRPF31	AS-BN_vs_AS-BP
2.49031e-05	0.461707	0.808	0.957	0.435256	TIMM10	AS-BN_vs_AS-BP
2.57918e-05	0.963313	0.581	0.72	0.450789	AGFG1	AS-BN_vs_AS-BP
2.65466e-05	1.04953	0.313	0.362	0.463982	SASH1	AS-BN_vs_AS-BP
2.67521e-05	0.525949	0.389	0.404	0.467573	C1QTNF6	AS-BN_vs_AS-BP
2.70583e-05	0.453578	0.641	0.799	0.472925	EPHB2	AS-BN_vs_AS-BP
2.71637e-05	0.892026	0.687	0.815	0.474767	GLRX	AS-BN_vs_AS-BP
2.77327e-05	0.760658	0.884	0.97	0.484713	GTF2A2	AS-BN_vs_AS-BP
2.84752e-05	0.834749	0.889	0.953	0.497689	GTF2H5	AS-BN_vs_AS-BP
2.84826e-05	0.686873	0.939	0.982	0.497818	EIF5B	AS-BN_vs_AS-BP
2.92154e-05	1.08782	0.884	0.936	0.510627	SNRPF	AS-BN_vs_AS-BP
3.04473e-05	0.756405	0.722	0.848	0.532157	RAB13	AS-BN_vs_AS-BP
3.1751e-05	0.822608	0.379	0.456	0.554944	C6orf120	AS-BN_vs_AS-BP
3.35937e-05	0.830169	0.692	0.753	0.587151	PPFIBP1	AS-BN_vs_AS-BP
3.38078e-05	0.788196	0.732	0.78	0.590893	CDIPT	AS-BN_vs_AS-BP
3.46747e-05	0.564781	0.692	0.865	0.606045	SMIM26	AS-BN_vs_AS-BP
3.47979e-05	0.909774	0.687	0.811	0.608197	LSM5	AS-BN_vs_AS-BP
3.4914e-05	1.09016	0.98	0.97	0.610226	TBCA	AS-BN_vs_AS-BP
3.49203e-05	0.255639	1	1	0.610337	GSTP1	AS-BN_vs_AS-BP
3.51487e-05	1.22718	0.338	0.26	0.614329	ITGA4	AS-BN_vs_AS-BP
3.5813e-05	0.429555	0.379	0.336	0.62594	PAK4	AS-BN_vs_AS-BP
3.5956e-05	1.22189	0.561	0.447	0.62844	RING1	AS-BN_vs_AS-BP
3.62815e-05	1.03045	0.465	0.519	0.634128	IGFBPL1	AS-BN_vs_AS-BP
3.64053e-05	0.359066	0.424	0.673	0.636292	FAM3C	AS-BN_vs_AS-BP
3.7171e-05	0.491693	0.293	0.089	0.649675	ASPN	AS-BN_vs_AS-BP
3.76761e-05	0.707276	0.258	0.423	0.658503	DOK5	AS-BN_vs_AS-BP
3.78001e-05	0.484889	0.874	0.957	0.660669	PSMA1	AS-BN_vs_AS-BP
3.8092e-05	0.828642	0.424	0.339	0.665773	PIK3CD	AS-BN_vs_AS-BP
3.81385e-05	1.19243	0.5	0.374	0.666585	CCDC8	AS-BN_vs_AS-BP
3.88075e-05	0.272545	0.889	0.959	0.678277	GNG5	AS-BN_vs_AS-BP
3.9947e-05	0.270204	0.258	0.543	0.698193	PABIR1	AS-BN_vs_AS-BP
3.9957e-05	0.626463	0.258	0.317	0.698369	B3GNT5	AS-BN_vs_AS-BP
4.08585e-05	0.348076	0.955	0.997	0.714126	RCN1	AS-BN_vs_AS-BP
4.1212e-05	0.399793	0.343	0.572	0.720303	TRAPPC2B	AS-BN_vs_AS-BP
4.44141e-05	1.23162	0.535	0.476	0.77627	SNTB2	AS-BN_vs_AS-BP
4.51279e-05	0.642371	0.747	0.898	0.788746	PPIC	AS-BN_vs_AS-BP
4.51413e-05	0.554098	0.737	0.746	0.788979	AKT2	AS-BN_vs_AS-BP
4.59828e-05	0.755831	0.444	0.333	0.803687	PSMB8	AS-BN_vs_AS-BP
4.65992e-05	0.425318	0.646	0.805	0.814461	TANC1	AS-BN_vs_AS-BP
4.69964e-05	0.374658	0.152	0.293	0.821403	ANKH	AS-BN_vs_AS-BP
4.80897e-05	0.956767	0.455	0.555	0.840511	TET3	AS-BN_vs_AS-BP
4.93356e-05	0.988762	0.49	0.488	0.862287	RASAL2	AS-BN_vs_AS-BP
4.93378e-05	0.714233	0.621	0.765	0.862327	PRKCI	AS-BN_vs_AS-BP
4.96946e-05	0.639495	0.47	0.485	0.868563	ZNF217	AS-BN_vs_AS-BP
4.99086e-05	1.14944	0.525	0.439	0.872302	RPS6KA3	AS-BN_vs_AS-BP
5.11174e-05	1.29889	0.54	0.62	0.893429	FNDC1	AS-BN_vs_AS-BP
5.13493e-05	1.24506	0.455	0.345	0.897484	LAYN	AS-BN_vs_AS-BP
5.1794e-05	0.285736	0.303	0.595	0.905256	TPRG1L	AS-BN_vs_AS-BP
5.24942e-05	1.34286	0.354	0.229	0.917494	CBX4	AS-BN_vs_AS-BP
5.61575e-05	0.279157	0.399	0.661	0.981521	LAGE3	AS-BN_vs_AS-BP
5.62657e-05	0.973307	0.707	0.617	0.983411	KHSRP	AS-BN_vs_AS-BP
5.63069e-05	2.02425	0.318	0.108	0.984131	KRT17	AS-BN_vs_AS-BP
5.65134e-05	1.16	0.929	0.925	0.987741	THBS1	AS-BN_vs_AS-BP
5.6813e-05	0.622941	0.263	0.454	0.992978	R3HCC1L	AS-BN_vs_AS-BP
5.69247e-05	0.991632	0.692	0.72	0.994931	BOD1L1	AS-BN_vs_AS-BP
5.82976e-05	1.09284	0.52	0.497	1	CDR2L	AS-BN_vs_AS-BP
5.88974e-05	1.02036	0.995	0.994	1	H4C3	AS-BN_vs_AS-BP
5.91342e-05	0.625491	0.424	0.525	1	HLCS	AS-BN_vs_AS-BP
5.91958e-05	0.336979	0.601	0.814	1	CKS2	AS-BN_vs_AS-BP
5.9889e-05	0.314768	0.879	0.963	1	HIGD2A	AS-BN_vs_AS-BP
6.20146e-05	1.22576	0.535	0.475	1	AHI1	AS-BN_vs_AS-BP
6.20703e-05	0.633194	0.828	0.929	1	CAMTA1	AS-BN_vs_AS-BP
6.35729e-05	0.284308	0.717	0.895	1	BBX	AS-BN_vs_AS-BP
6.36645e-05	1.38142	0.742	0.583	1	ATXN1	AS-BN_vs_AS-BP
6.44873e-05	0.357727	0.227	0.481	1	TSR3	AS-BN_vs_AS-BP
6.54829e-05	0.773693	0.879	0.922	1	JTB	AS-BN_vs_AS-BP
6.66536e-05	0.661363	0.707	0.877	1	MRPL40	AS-BN_vs_AS-BP
6.79736e-05	0.434862	0.753	0.833	1	LCOR	AS-BN_vs_AS-BP
6.83577e-05	1.34704	0.864	0.76	1	KDELR3	AS-BN_vs_AS-BP
6.9335e-05	0.25952	0.657	0.672	1	PMM2	AS-BN_vs_AS-BP
7.70318e-05	0.359614	0.919	0.967	1	WSB2	AS-BN_vs_AS-BP
7.76942e-05	0.938694	1	0.996	1	OSTC	AS-BN_vs_AS-BP
7.92061e-05	0.387972	0.884	0.969	1	KDM5B	AS-BN_vs_AS-BP
7.93423e-05	1.07858	0.551	0.386	1	SKI	AS-BN_vs_AS-BP
7.94598e-05	0.618894	0.551	0.743	1	ACOT13	AS-BN_vs_AS-BP
8.06715e-05	0.541832	0.616	0.716	1	PLOD3	AS-BN_vs_AS-BP
8.12922e-05	0.35926	0.899	0.978	1	RBM39	AS-BN_vs_AS-BP
8.13197e-05	1.05048	0.692	0.601	1	MYO1E	AS-BN_vs_AS-BP
8.1509e-05	0.995037	0.288	0.13	1	HMCN2	AS-BN_vs_AS-BP
8.15362e-05	0.550612	0.843	0.92	1	BRD4	AS-BN_vs_AS-BP
8.24963e-05	1.08389	0.449	0.433	1	FIGN	AS-BN_vs_AS-BP
8.30738e-05	0.952548	0.995	0.997	1	RPS7	AS-BN_vs_AS-BP
8.31339e-05	0.580753	0.333	0.43	1	ITSN2	AS-BN_vs_AS-BP
8.57755e-05	0.801991	0.97	0.969	1	SH3BGRL	AS-BN_vs_AS-BP
8.70815e-05	0.95797	0.732	0.743	1	MED13L	AS-BN_vs_AS-BP
8.74075e-05	0.318084	0.904	0.966	1	SEC22B	AS-BN_vs_AS-BP
8.83809e-05	0.97861	0.52	0.467	1	SOGA1	AS-BN_vs_AS-BP
8.89511e-05	0.271734	0.904	0.984	1	TMEM208	AS-BN_vs_AS-BP
8.93141e-05	0.329644	0.338	0.621	1	ESCO1	AS-BN_vs_AS-BP
9.08969e-05	0.351887	0.268	0.296	1	NSG1	AS-BN_vs_AS-BP
9.18884e-05	0.375477	0.434	0.72	1	BBIP1	AS-BN_vs_AS-BP
9.36958e-05	1.1757	0.818	0.737	1	FHL2	AS-BN_vs_AS-BP
9.37001e-05	0.540479	0.96	0.988	1	HMGN1	AS-BN_vs_AS-BP
9.43502e-05	0.331198	0.318	0.642	1	APIP	AS-BN_vs_AS-BP
9.63223e-05	0.737651	0.975	0.991	1	HNRNPU	AS-BN_vs_AS-BP
9.69004e-05	1.2118	0.293	0.129	1	NLRC5	AS-BN_vs_AS-BP
9.72977e-05	1.74708	0.333	0.16	1	TGM2	AS-BN_vs_AS-BP
9.92231e-05	0.475701	0.419	0.672	1	ARMC10	AS-BN_vs_AS-BP
0.00010049	0.630948	0.697	0.809	1	WIPF2	AS-BN_vs_AS-BP
0.000103664	1.00903	0.343	0.286	1	RGS10	AS-BN_vs_AS-BP
0.000103689	0.453154	0.965	0.988	1	NDUFAB1	AS-BN_vs_AS-BP
0.000104432	0.928952	1	1	1	RPL27	AS-BN_vs_AS-BP
0.000106228	0.351535	0.227	0.509	1	FDX1	AS-BN_vs_AS-BP
0.000107234	1.17481	0.551	0.469	1	VWA1	AS-BN_vs_AS-BP
0.000107673	0.554956	0.51	0.475	1	PWWP3A	AS-BN_vs_AS-BP
0.000107796	1.14528	0.53	0.32	1	SPEG	AS-BN_vs_AS-BP
0.000108608	0.594352	0.146	0.34	1	MEMO1	AS-BN_vs_AS-BP
0.00010896	0.451089	0.884	0.976	1	METAP2	AS-BN_vs_AS-BP
0.000110285	0.252721	0.843	0.976	1	ZC3H15	AS-BN_vs_AS-BP
0.000110699	0.593086	0.646	0.672	1	CANT1	AS-BN_vs_AS-BP
0.000116582	1.26918	0.48	0.428	1	NEDD4L	AS-BN_vs_AS-BP
0.000116589	0.834381	0.848	0.913	1	TDG	AS-BN_vs_AS-BP
0.000119094	0.840341	0.429	0.66	1	PIGP	AS-BN_vs_AS-BP
0.00011931	0.455452	0.5	0.528	1	THBS3	AS-BN_vs_AS-BP
0.000122826	1.05664	1	0.991	1	UBL5	AS-BN_vs_AS-BP
0.000123633	0.325651	0.49	0.719	1	FBN2	AS-BN_vs_AS-BP
0.000124664	1.54858	0.677	0.491	1	DACT3	AS-BN_vs_AS-BP
0.000125385	0.505673	0.535	0.775	1	RWDD4	AS-BN_vs_AS-BP
0.000128083	1.51175	0.54	0.428	1	STK17B	AS-BN_vs_AS-BP
0.000130596	0.626231	0.177	0.291	1	ORAI3	AS-BN_vs_AS-BP
0.000131149	0.772283	0.778	0.914	1	UXT	AS-BN_vs_AS-BP
0.000131219	1.07115	0.303	0.274	1	NALF1	AS-BN_vs_AS-BP
0.000131386	0.907029	0.949	0.97	1	HSPE1	AS-BN_vs_AS-BP
0.000134519	0.995409	0.995	0.988	1	ATP5MG	AS-BN_vs_AS-BP
0.00013515	0.27607	0.788	0.966	1	UBE2E3	AS-BN_vs_AS-BP
0.000137348	0.377083	0.687	0.857	1	CRIPT	AS-BN_vs_AS-BP
0.000139947	1.07939	0.455	0.454	1	KLHL21	AS-BN_vs_AS-BP
0.000141608	0.973997	0.586	0.759	1	CIR1	AS-BN_vs_AS-BP
0.000142915	0.476988	0.606	0.848	1	DESI2	AS-BN_vs_AS-BP
0.000145822	0.28197	0.677	0.886	1	CAMLG	AS-BN_vs_AS-BP
0.00014645	0.964319	0.899	0.908	1	C12orf57	AS-BN_vs_AS-BP
0.000148046	0.696673	0.232	0.433	1	FAM76B	AS-BN_vs_AS-BP
0.000150252	1.5282	0.404	0.342	1	TGFBR2	AS-BN_vs_AS-BP
0.000150854	0.886989	0.909	0.899	1	GALNT2	AS-BN_vs_AS-BP
0.000150857	0.96129	0.611	0.704	1	BOLA3	AS-BN_vs_AS-BP
0.000152117	1.14306	0.359	0.3	1	POGLUT3	AS-BN_vs_AS-BP
0.000152576	1.1578	0.949	0.929	1	SRM	AS-BN_vs_AS-BP
0.000153147	0.560025	0.753	0.898	1	RPL26L1	AS-BN_vs_AS-BP
0.0001537	0.648037	0.652	0.834	1	IFT25	AS-BN_vs_AS-BP
0.00015549	0.562033	0.662	0.786	1	TMF1	AS-BN_vs_AS-BP
0.000155646	1.10434	0.596	0.565	1	PTGFRN	AS-BN_vs_AS-BP
0.000157792	0.378577	0.697	0.889	1	PLPP5	AS-BN_vs_AS-BP
0.000158584	1.07083	0.359	0.346	1	RALGPS2	AS-BN_vs_AS-BP
0.000158955	1.12745	0.288	0.191	1	TBC1D4	AS-BN_vs_AS-BP
0.000163835	0.847021	0.914	0.948	1	DDX21	AS-BN_vs_AS-BP
0.000164901	0.568337	0.515	0.561	1	SDF4	AS-BN_vs_AS-BP
0.000165798	0.574921	0.727	0.496	1	CSKMT	AS-BN_vs_AS-BP
0.000167477	0.709721	0.631	0.68	1	EFR3A	AS-BN_vs_AS-BP
0.000167656	1.10133	0.298	0.132	1	CACNA1C	AS-BN_vs_AS-BP
0.000169284	0.283758	1	1	1	RPS4X	AS-BN_vs_AS-BP
0.000173895	0.447572	0.854	0.901	1	TACC1	AS-BN_vs_AS-BP
0.00017686	1.19146	0.763	0.623	1	TMEM214	AS-BN_vs_AS-BP
0.000177846	0.415641	0.803	0.935	1	ZRANB2	AS-BN_vs_AS-BP
0.000180833	0.769845	0.318	0.201	1	RPS6KA4	AS-BN_vs_AS-BP
0.000182334	1.0699	0.424	0.246	1	GAS2L1	AS-BN_vs_AS-BP
0.000184683	1.46904	0.333	0.148	1	SCARA3	AS-BN_vs_AS-BP
0.000185083	0.504607	0.919	0.956	1	WSB1	AS-BN_vs_AS-BP
0.000186445	0.254295	0.843	0.962	1	MRPL57	AS-BN_vs_AS-BP
0.000187528	0.999391	0.535	0.522	1	UBE2S	AS-BN_vs_AS-BP
0.000187614	1.44253	0.505	0.428	1	RASSF8	AS-BN_vs_AS-BP
0.000189096	0.710175	0.742	0.87	1	KDM1A	AS-BN_vs_AS-BP
0.000193596	0.802842	0.904	0.963	1	PDCD5	AS-BN_vs_AS-BP
0.000195357	0.747513	0.697	0.867	1	TMEM126A	AS-BN_vs_AS-BP
0.000195403	1.18949	0.561	0.487	1	GLI3	AS-BN_vs_AS-BP
0.000198545	0.769562	0.859	0.905	1	ZNF827	AS-BN_vs_AS-BP
0.000199641	0.466245	0.899	0.984	1	FKBP3	AS-BN_vs_AS-BP
0.000203858	1.34506	0.268	0.126	1	F8A1	AS-BN_vs_AS-BP
0.000206207	0.395659	0.288	0.55	1	ANKRD39	AS-BN_vs_AS-BP
0.000209555	0.434434	0.429	0.626	1	PGM1	AS-BN_vs_AS-BP
0.000209701	0.998056	0.354	0.161	1	PLEKHG5	AS-BN_vs_AS-BP
0.0002122	0.251013	0.515	0.768	1	H2BC12	AS-BN_vs_AS-BP
0.000212522	1.08114	0.667	0.601	1	BCAR1	AS-BN_vs_AS-BP
0.000214863	0.705558	0.848	0.899	1	FAM98A	AS-BN_vs_AS-BP
0.000216147	0.852969	0.596	0.608	1	IFI16	AS-BN_vs_AS-BP
0.000217268	0.336654	0.626	0.839	1	DR1	AS-BN_vs_AS-BP
0.000221897	0.583867	0.904	0.966	1	H3-3A	AS-BN_vs_AS-BP
0.000224978	0.573864	0.611	0.635	1	SMG5	AS-BN_vs_AS-BP
0.000229379	1.18195	0.596	0.661	1	YAP1	AS-BN_vs_AS-BP
0.000230103	0.875964	0.657	0.703	1	RBBP6	AS-BN_vs_AS-BP
0.000232673	1.1725	0.434	0.38	1	H2AX	AS-BN_vs_AS-BP
0.000234654	0.394265	0.985	0.997	1	SELENOW	AS-BN_vs_AS-BP
0.00023709	0.623004	0.636	0.803	1	CD2AP	AS-BN_vs_AS-BP
0.000243498	1.1824	0.54	0.565	1	NETO2	AS-BN_vs_AS-BP
0.000243985	0.326405	0.944	0.996	1	DYNLT1	AS-BN_vs_AS-BP
0.000248384	1.21415	0.874	0.857	1	IRF2BP2	AS-BN_vs_AS-BP
0.00025256	0.621662	0.273	0.42	1	FLRT2	AS-BN_vs_AS-BP
0.000253892	0.688527	0.914	0.966	1	USP9X	AS-BN_vs_AS-BP
0.000255072	0.583026	0.798	0.935	1	MRPS14	AS-BN_vs_AS-BP
0.00025629	0.807898	0.914	0.962	1	NDUFA2	AS-BN_vs_AS-BP
0.000257356	0.520396	0.586	0.717	1	DYNLT3	AS-BN_vs_AS-BP
0.000260083	0.751454	0.313	0.346	1	LSM14B	AS-BN_vs_AS-BP
0.000261349	0.443896	0.98	0.99	1	PLS3	AS-BN_vs_AS-BP
0.00026176	0.758513	0.939	0.979	1	PCBP2	AS-BN_vs_AS-BP
0.000268086	0.502898	0.894	0.957	1	GOLGB1	AS-BN_vs_AS-BP
0.000269575	0.451692	0.207	0.322	1	SMO	AS-BN_vs_AS-BP
0.000285657	0.627017	0.192	0.253	1	UBE2C	AS-BN_vs_AS-BP
0.000286112	0.569743	0.434	0.651	1	HSCB	AS-BN_vs_AS-BP
0.00029119	0.34169	0.237	0.528	1	SIAH1	AS-BN_vs_AS-BP
0.000294174	0.256414	0.389	0.402	1	FBXL18	AS-BN_vs_AS-BP
0.000311794	0.633972	0.884	0.96	1	VKORC1	AS-BN_vs_AS-BP
0.000314531	0.478421	0.434	0.595	1	PLEKHA5	AS-BN_vs_AS-BP
0.000325654	0.910441	0.672	0.586	1	ARHGAP31	AS-BN_vs_AS-BP
0.000327668	0.567148	0.737	0.843	1	KLC1	AS-BN_vs_AS-BP
0.00032798	0.313226	1	1	1	RPS19	AS-BN_vs_AS-BP
0.000331049	0.898505	0.773	0.859	1	MFSD1	AS-BN_vs_AS-BP
0.000333117	1.13536	0.429	0.302	1	SLC2A4RG	AS-BN_vs_AS-BP
0.000335345	0.584167	0.52	0.556	1	SRGAP1	AS-BN_vs_AS-BP
0.000337863	0.895381	0.379	0.376	1	AGRN	AS-BN_vs_AS-BP
0.000338302	0.340088	0.97	0.996	1	PSMB4	AS-BN_vs_AS-BP
0.000340454	0.5183	0.692	0.76	1	SLC26A2	AS-BN_vs_AS-BP
0.000341529	0.741483	0.53	0.453	1	ZNF618	AS-BN_vs_AS-BP
0.000344728	0.810533	0.97	0.969	1	FAM114A1	AS-BN_vs_AS-BP
0.000345084	0.455481	0.328	0.426	1	TRMT2A	AS-BN_vs_AS-BP
0.000356791	0.488215	0.556	0.726	1	TRIP6	AS-BN_vs_AS-BP
0.000358503	0.448543	0.328	0.429	1	FST	AS-BN_vs_AS-BP
0.000361156	0.835003	0.253	0.22	1	PTPRN2	AS-BN_vs_AS-BP
0.000362846	0.610433	0.505	0.66	1	ZCCHC24	AS-BN_vs_AS-BP
0.000367031	1.1794	0.682	0.649	1	GATAD1	AS-BN_vs_AS-BP
0.000369468	0.906364	0.747	0.763	1	MMP24OS	AS-BN_vs_AS-BP
0.000369621	0.459976	0.944	0.982	1	NDUFA12	AS-BN_vs_AS-BP
0.000373684	0.808921	0.47	0.438	1	OLFML2A	AS-BN_vs_AS-BP
0.000376627	0.914983	0.606	0.586	1	FXR2	AS-BN_vs_AS-BP
0.000377248	0.548031	0.242	0.391	1	PCDH7	AS-BN_vs_AS-BP
0.000382559	0.541149	0.914	0.967	1	ELOC	AS-BN_vs_AS-BP
0.000395905	0.711755	0.515	0.466	1	EGR1	AS-BN_vs_AS-BP
0.000397879	0.994121	0.662	0.775	1	RHOQ	AS-BN_vs_AS-BP
0.000400647	0.406515	0.606	0.842	1	RETREG2	AS-BN_vs_AS-BP
0.000404738	0.76545	0.217	0.274	1	SPATA18	AS-BN_vs_AS-BP
0.000414969	0.741809	0.288	0.145	1	SEZ6L2	AS-BN_vs_AS-BP
0.000416519	0.555615	0.732	0.883	1	CAMSAP2	AS-BN_vs_AS-BP
0.000419378	0.305418	0.253	0.422	1	FBXO33	AS-BN_vs_AS-BP
0.000420166	0.282313	0.773	0.88	1	USP7	AS-BN_vs_AS-BP
0.000424021	0.966962	0.859	0.84	1	SULF2	AS-BN_vs_AS-BP
0.000430371	0.473354	0.369	0.63	1	LSM6	AS-BN_vs_AS-BP
0.000436037	0.394893	0.778	0.876	1	TTYH3	AS-BN_vs_AS-BP
0.000437782	0.457191	0.838	0.951	1	MRPL17	AS-BN_vs_AS-BP
0.000437849	1.01739	0.808	0.774	1	ABL1	AS-BN_vs_AS-BP
0.000439475	0.332046	0.97	0.981	1	APP	AS-BN_vs_AS-BP
0.00044315	0.848259	0.818	0.898	1	TMEM165	AS-BN_vs_AS-BP
0.000443415	0.488229	0.556	0.507	1	PPRC1	AS-BN_vs_AS-BP
0.000464052	1.51683	0.394	0.336	1	TFPI2	AS-BN_vs_AS-BP
0.000464067	0.532283	0.874	0.945	1	PTEN	AS-BN_vs_AS-BP
0.000465699	1.53462	0.414	0.364	1	SIPA1L2	AS-BN_vs_AS-BP
0.000468417	0.669767	0.838	0.904	1	PPP3CA	AS-BN_vs_AS-BP
0.000469489	0.968395	0.298	0.25	1	SLC2A10	AS-BN_vs_AS-BP
0.000470463	0.404033	0.359	0.547	1	CREB5	AS-BN_vs_AS-BP
0.00047501	0.344452	0.298	0.447	1	ACVR1	AS-BN_vs_AS-BP
0.000477377	0.825265	0.419	0.385	1	PAK1	AS-BN_vs_AS-BP
0.000483407	0.978249	0.429	0.522	1	PKD2	AS-BN_vs_AS-BP
0.000484011	0.769976	0.753	0.833	1	CREBBP	AS-BN_vs_AS-BP
0.000492212	1.05499	0.414	0.327	1	SH3BP2	AS-BN_vs_AS-BP
0.000492418	0.531254	0.323	0.549	1	MFSD14B	AS-BN_vs_AS-BP
0.000495031	0.261495	0.571	0.82	1	BORCS7	AS-BN_vs_AS-BP
0.000496674	0.738367	0.616	0.587	1	CHD3	AS-BN_vs_AS-BP
0.00050419	0.718135	0.717	0.762	1	CLTB	AS-BN_vs_AS-BP
0.000509353	0.589508	0.742	0.834	1	ZNF532	AS-BN_vs_AS-BP
0.000509381	0.82713	0.338	0.376	1	BTBD6	AS-BN_vs_AS-BP
0.000510151	0.250166	0.253	0.422	1	TP53I13	AS-BN_vs_AS-BP
0.000511721	0.309835	0.838	0.951	1	GRB2	AS-BN_vs_AS-BP
0.000520779	0.295166	0.667	0.867	1	ZMYND11	AS-BN_vs_AS-BP
0.000523446	2.42307	0.343	0.093	1	ACTC1	AS-BN_vs_AS-BP
0.000525862	0.415343	0.303	0.445	1	ADARB1	AS-BN_vs_AS-BP
0.000529142	0.490857	0.601	0.612	1	U2AF2	AS-BN_vs_AS-BP
0.000535452	1.38924	0.419	0.253	1	DGAT1	AS-BN_vs_AS-BP
0.000542098	0.857344	0.399	0.331	1	ANKRD36C	AS-BN_vs_AS-BP
0.000546749	0.711264	0.864	0.879	1	GLG1	AS-BN_vs_AS-BP
0.000549758	0.875144	0.46	0.555	1	CCDC14	AS-BN_vs_AS-BP
0.000554385	1.30377	0.394	0.306	1	FNDC4	AS-BN_vs_AS-BP
0.000567532	0.48669	0.884	0.962	1	POLR2F	AS-BN_vs_AS-BP
0.000571494	0.254865	0.859	0.95	1	TRIM44	AS-BN_vs_AS-BP
0.000571707	0.593179	0.232	0.297	1	ZFTA	AS-BN_vs_AS-BP
0.00058087	1.20528	0.566	0.422	1	RABL6	AS-BN_vs_AS-BP
0.00058091	0.904337	0.399	0.352	1	PCSK7	AS-BN_vs_AS-BP
0.00058357	0.323764	0.783	0.938	1	GTF2F2	AS-BN_vs_AS-BP
0.000585264	0.266056	0.409	0.663	1	TENT4B	AS-BN_vs_AS-BP
0.00059187	0.851161	0.369	0.3	1	SLC1A3	AS-BN_vs_AS-BP
0.000592363	1.05615	0.338	0.132	1	KCNK6	AS-BN_vs_AS-BP
0.000603061	0.806665	0.586	0.538	1	CDC42BPB	AS-BN_vs_AS-BP
0.000608131	0.833849	0.515	0.675	1	SUZ12	AS-BN_vs_AS-BP
0.00060971	1.2324	0.429	0.283	1	TTN	AS-BN_vs_AS-BP
0.000610686	0.289307	0.944	0.981	1	NDUFB7	AS-BN_vs_AS-BP
0.000626352	0.943844	0.278	0.149	1	MAPK8IP3	AS-BN_vs_AS-BP
0.000627439	0.740613	0.566	0.695	1	CDK12	AS-BN_vs_AS-BP
0.00063226	1.0643	0.556	0.604	1	ATF7	AS-BN_vs_AS-BP
0.000634065	0.992264	0.727	0.775	1	MTLN	AS-BN_vs_AS-BP
0.000639273	0.530431	0.46	0.648	1	NCOA6	AS-BN_vs_AS-BP
0.000641593	0.616892	0.727	0.805	1	BOK	AS-BN_vs_AS-BP
0.000645642	0.540875	0.525	0.726	1	ESF1	AS-BN_vs_AS-BP
0.000648283	0.801591	0.449	0.633	1	IMMP1L	AS-BN_vs_AS-BP
0.000649742	0.88419	1	1	1	GNAS	AS-BN_vs_AS-BP
0.000650928	1.02419	0.379	0.456	1	NPHP3	AS-BN_vs_AS-BP
0.000656016	0.493623	0.298	0.43	1	SIRPA	AS-BN_vs_AS-BP
0.000656408	0.840045	0.702	0.818	1	NOTCH2	AS-BN_vs_AS-BP
0.000665587	0.852847	0.808	0.864	1	HNRNPAB	AS-BN_vs_AS-BP
0.000675094	0.866284	0.939	0.966	1	RWDD1	AS-BN_vs_AS-BP
0.000678302	0.749581	0.687	0.707	1	SPDL1	AS-BN_vs_AS-BP
0.000702871	0.585928	0.48	0.683	1	DNAJC21	AS-BN_vs_AS-BP
0.000713125	0.261269	0.803	0.942	1	ATG12	AS-BN_vs_AS-BP
0.000715304	0.786893	0.571	0.574	1	RAB3B	AS-BN_vs_AS-BP
0.000722859	0.831466	0.96	0.984	1	MGST3	AS-BN_vs_AS-BP
0.000725736	1.06461	0.293	0.214	1	EFS	AS-BN_vs_AS-BP
0.000726068	0.493744	0.318	0.428	1	N4BP2	AS-BN_vs_AS-BP
0.000735235	0.319109	0.217	0.428	1	REPS1	AS-BN_vs_AS-BP
0.000737449	0.914883	0.813	0.876	1	GOLGA4	AS-BN_vs_AS-BP
0.000739018	0.269719	0.803	0.923	1	NDUFAF8	AS-BN_vs_AS-BP
0.000742929	0.536177	0.869	0.966	1	ERLEC1	AS-BN_vs_AS-BP
0.000750236	0.562047	0.571	0.722	1	DENND5A	AS-BN_vs_AS-BP
0.000753486	0.831133	0.909	0.959	1	NSA2	AS-BN_vs_AS-BP
0.000761773	0.394996	0.217	0.382	1	EEF1AKMT1	AS-BN_vs_AS-BP
0.000763954	0.598187	0.364	0.528	1	DNAH14	AS-BN_vs_AS-BP
0.000766948	0.864893	0.571	0.612	1	TMA16	AS-BN_vs_AS-BP
0.000768991	1.05524	0.253	0.2	1	GMIP	AS-BN_vs_AS-BP
0.000784256	0.445333	0.859	0.932	1	HSPH1	AS-BN_vs_AS-BP
0.000805507	0.300713	0.596	0.598	1	SP100	AS-BN_vs_AS-BP
0.000811152	0.376924	0.99	0.994	1	ATP6V0B	AS-BN_vs_AS-BP
0.000815995	0.81163	0.823	0.854	1	EFNB2	AS-BN_vs_AS-BP
0.000817954	0.603354	0.263	0.476	1	SLC41A2	AS-BN_vs_AS-BP
0.000820727	0.766975	0.641	0.686	1	CSNK1E	AS-BN_vs_AS-BP
0.000823961	0.48133	0.874	0.889	1	NFE2L1	AS-BN_vs_AS-BP
0.00082398	0.667585	0.97	0.973	1	DPYSL3	AS-BN_vs_AS-BP
0.000825521	1.11332	0.939	0.925	1	NUAK1	AS-BN_vs_AS-BP
0.000831286	0.513082	0.333	0.547	1	TRAPPC8	AS-BN_vs_AS-BP
0.000838994	0.882027	0.313	0.306	1	ARHGEF18	AS-BN_vs_AS-BP
0.000839983	0.670319	0.869	0.93	1	MICOS10	AS-BN_vs_AS-BP
0.000844129	0.466978	0.424	0.632	1	MITD1	AS-BN_vs_AS-BP
0.000845536	0.279737	0.273	0.559	1	ULBP3	AS-BN_vs_AS-BP
0.000853399	1.24709	0.778	0.754	1	BPNT2	AS-BN_vs_AS-BP
0.000863128	0.511317	0.803	0.944	1	EAPP	AS-BN_vs_AS-BP
0.000865349	0.363835	0.874	0.942	1	MTMR2	AS-BN_vs_AS-BP
0.000865685	1.0227	0.379	0.494	1	GXYLT1	AS-BN_vs_AS-BP
0.000879593	0.671275	0.429	0.626	1	C1GALT1	AS-BN_vs_AS-BP
0.000885802	0.974826	0.449	0.464	1	KCTD15	AS-BN_vs_AS-BP
0.000890617	0.422753	0.753	0.905	1	LRRFIP1	AS-BN_vs_AS-BP
0.000915299	0.722935	0.51	0.578	1	SLC4A7	AS-BN_vs_AS-BP
0.000920256	0.978949	0.364	0.383	1	CLK2	AS-BN_vs_AS-BP
0.000931101	1.27241	0.616	0.697	1	EXOSC9	AS-BN_vs_AS-BP
0.000931454	0.525431	0.773	0.907	1	PPP4R2	AS-BN_vs_AS-BP
0.000936183	0.433075	0.515	0.691	1	RNF19A	AS-BN_vs_AS-BP
0.000962275	0.535649	0.753	0.904	1	CDC16	AS-BN_vs_AS-BP
0.000963553	0.321187	0.98	0.996	1	SSR2	AS-BN_vs_AS-BP
0.000969759	1.13554	0.641	0.556	1	MIDN	AS-BN_vs_AS-BP
0.000976677	0.445214	0.232	0.364	1	SLC7A6	AS-BN_vs_AS-BP
0.000993943	1.04259	0.49	0.414	1	AGAP3	AS-BN_vs_AS-BP
0.000998018	0.811544	0.798	0.799	1	RRAS	AS-BN_vs_AS-BP
0.00100065	0.965457	0.333	0.237	1	CIB2	AS-BN_vs_AS-BP
0.00100323	0.461275	0.596	0.787	1	MTMR9	AS-BN_vs_AS-BP
0.00101561	0.831786	0.384	0.479	1	RYBP	AS-BN_vs_AS-BP
0.00102076	0.996535	0.909	0.923	1	EMP3	AS-BN_vs_AS-BP
0.00103246	0.922832	0.333	0.398	1	SMAD7	AS-BN_vs_AS-BP
0.00104272	0.626024	0.944	0.985	1	LAMTOR5	AS-BN_vs_AS-BP
0.00104346	0.631296	0.707	0.762	1	USP9Y	AS-BN_vs_AS-BP
0.00105216	0.576419	0.333	0.374	1	CELSR2	AS-BN_vs_AS-BP
0.00105465	0.372774	0.808	0.864	1	CHD8	AS-BN_vs_AS-BP
0.0010754	0.419387	0.545	0.694	1	DSG2	AS-BN_vs_AS-BP
0.00110382	0.981485	0.682	0.737	1	ZSWIM6	AS-BN_vs_AS-BP
0.00111078	1.01139	0.258	0.302	1	SETD1B	AS-BN_vs_AS-BP
0.00112563	1.02879	0.768	0.7	1	ANKLE2	AS-BN_vs_AS-BP
0.00113762	0.98965	0.874	0.907	1	OSBPL8	AS-BN_vs_AS-BP
0.00114047	0.405205	0.283	0.374	1	SORCS2	AS-BN_vs_AS-BP
0.00114221	0.549869	0.263	0.241	1	CNTROB	AS-BN_vs_AS-BP
0.0011747	0.659712	0.909	0.922	1	TAF13	AS-BN_vs_AS-BP
0.00117925	0.858394	0.561	0.601	1	E2F3	AS-BN_vs_AS-BP
0.00120696	1.18767	0.687	0.543	1	FURIN	AS-BN_vs_AS-BP
0.0012114	0.588424	1	1	1	RPL7	AS-BN_vs_AS-BP
0.00121923	1.39273	0.343	0.293	1	SUGCT	AS-BN_vs_AS-BP
0.00121981	0.552529	0.571	0.636	1	BACH1	AS-BN_vs_AS-BP
0.00122889	0.397389	0.803	0.928	1	CIB1	AS-BN_vs_AS-BP
0.00123017	1.1724	0.758	0.704	1	KIF3C	AS-BN_vs_AS-BP
0.0012463	0.67209	0.717	0.777	1	LDLR	AS-BN_vs_AS-BP
0.00124944	1.13595	0.298	0.291	1	DRAM1	AS-BN_vs_AS-BP
0.00125392	0.425149	0.652	0.697	1	NFIC	AS-BN_vs_AS-BP
0.00127061	0.868806	0.333	0.333	1	VANGL2	AS-BN_vs_AS-BP
0.00127869	1.17324	0.586	0.367	1	INF2	AS-BN_vs_AS-BP
0.0012857	0.315149	0.944	0.997	1	DNAJC8	AS-BN_vs_AS-BP
0.00129152	0.324314	0.394	0.624	1	VCPIP1	AS-BN_vs_AS-BP
0.00129908	0.483084	0.783	0.862	1	AP3D1	AS-BN_vs_AS-BP
0.00130533	0.469591	0.859	0.963	1	TXNL4A	AS-BN_vs_AS-BP
0.00130999	0.746696	0.268	0.299	1	ZBTB8A	AS-BN_vs_AS-BP
0.00133091	0.798839	0.298	0.246	1	OSBPL5	AS-BN_vs_AS-BP
0.00134403	0.353986	0.667	0.859	1	SKA2	AS-BN_vs_AS-BP
0.00136122	0.342551	0.768	0.91	1	RSRC2	AS-BN_vs_AS-BP
0.00136196	0.470771	0.227	0.374	1	RBM24	AS-BN_vs_AS-BP
0.00137019	0.520951	0.268	0.377	1	EPHA4	AS-BN_vs_AS-BP
0.00137125	0.799115	0.298	0.192	1	PLCB3	AS-BN_vs_AS-BP
0.00137554	1.3403	0.364	0.195	1	RYR3	AS-BN_vs_AS-BP
0.00138184	0.480437	0.737	0.855	1	DYNLRB1	AS-BN_vs_AS-BP
0.00138679	0.307209	0.899	0.962	1	SETD5	AS-BN_vs_AS-BP
0.00140129	0.542507	0.318	0.447	1	CLIP4	AS-BN_vs_AS-BP
0.00140681	0.399494	0.424	0.651	1	BTAF1	AS-BN_vs_AS-BP
0.00140982	0.460467	0.717	0.822	1	SENP6	AS-BN_vs_AS-BP
0.0014129	0.78465	0.869	0.905	1	PEG10	AS-BN_vs_AS-BP
0.00141417	0.410845	0.646	0.775	1	SEC16A	AS-BN_vs_AS-BP
0.0014149	0.26759	0.944	0.987	1	SERP1	AS-BN_vs_AS-BP
0.0014167	0.333593	0.778	0.857	1	RALY	AS-BN_vs_AS-BP
0.00142284	0.649196	0.444	0.561	1	RUSC1	AS-BN_vs_AS-BP
0.00143008	0.900533	1	1	1	SNRPD2	AS-BN_vs_AS-BP
0.00143515	1.27846	0.712	0.678	1	LATS2	AS-BN_vs_AS-BP
0.00144081	0.620957	0.551	0.652	1	HGSNAT	AS-BN_vs_AS-BP
0.00145259	0.409206	0.808	0.907	1	BLOC1S6	AS-BN_vs_AS-BP
0.00146405	0.560426	0.333	0.459	1	SLC35D1	AS-BN_vs_AS-BP
0.0014671	0.600407	0.611	0.747	1	DPM3	AS-BN_vs_AS-BP
0.00149213	0.596335	0.283	0.235	1	ATAD3A	AS-BN_vs_AS-BP
0.00149359	0.449173	0.495	0.714	1	MIX23	AS-BN_vs_AS-BP
0.0015039	0.432593	0.53	0.595	1	ACADVL	AS-BN_vs_AS-BP
0.00152124	0.373222	0.672	0.849	1	HAPSTR1	AS-BN_vs_AS-BP
0.00152969	0.927725	0.672	0.719	1	NAT14	AS-BN_vs_AS-BP
0.00154407	0.713307	0.798	0.898	1	SYNCRIP	AS-BN_vs_AS-BP
0.00154481	1.03614	0.641	0.543	1	SOX12	AS-BN_vs_AS-BP
0.00154555	0.339941	0.328	0.632	1	AGGF1	AS-BN_vs_AS-BP
0.00157188	0.309687	0.742	0.905	1	BNC2	AS-BN_vs_AS-BP
0.00159246	0.337261	0.212	0.417	1	DNAAF10	AS-BN_vs_AS-BP
0.00159628	0.614561	0.359	0.416	1	PTBP2	AS-BN_vs_AS-BP
0.0015998	0.626179	0.313	0.457	1	PIGX	AS-BN_vs_AS-BP
0.00160112	0.307962	0.581	0.811	1	KRAS	AS-BN_vs_AS-BP
0.0016072	0.312721	0.702	0.899	1	OSTM1	AS-BN_vs_AS-BP
0.00166817	0.356902	0.47	0.663	1	RNF145	AS-BN_vs_AS-BP
0.00170017	0.334369	1	1	1	RPS18	AS-BN_vs_AS-BP
0.00170122	0.367446	0.419	0.646	1	DYRK2	AS-BN_vs_AS-BP
0.00170393	1.06104	0.869	0.848	1	LAMB1	AS-BN_vs_AS-BP
0.00171304	1.05046	0.626	0.732	1	CCNY	AS-BN_vs_AS-BP
0.001716	0.335312	0.636	0.842	1	SREK1IP1	AS-BN_vs_AS-BP
0.00172868	0.514937	0.631	0.834	1	ZBTB8OS	AS-BN_vs_AS-BP
0.00173689	0.641273	0.621	0.749	1	MAP3K2	AS-BN_vs_AS-BP
0.00174303	0.343721	0.389	0.55	1	MAPK9	AS-BN_vs_AS-BP
0.00177616	0.680037	0.399	0.339	1	EPHB4	AS-BN_vs_AS-BP
0.00180368	1.16728	0.566	0.496	1	WIZ	AS-BN_vs_AS-BP
0.00180719	1.03067	0.328	0.212	1	TLNRD1	AS-BN_vs_AS-BP
0.00183858	0.66186	0.232	0.29	1	GOLGA8B	AS-BN_vs_AS-BP
0.0018537	0.564889	0.495	0.609	1	ZNF652	AS-BN_vs_AS-BP
0.00186892	0.634022	0.273	0.425	1	CASD1	AS-BN_vs_AS-BP
0.00190917	1.19438	0.258	0.164	1	CNNM2	AS-BN_vs_AS-BP
0.00191885	0.361996	0.53	0.803	1	PHF5A	AS-BN_vs_AS-BP
0.00192154	1.03162	0.384	0.459	1	SOWAHC	AS-BN_vs_AS-BP
0.00195156	0.567802	0.561	0.678	1	TET2	AS-BN_vs_AS-BP
0.00195915	0.310834	0.525	0.712	1	AKT1	AS-BN_vs_AS-BP
0.00195936	0.836085	0.884	0.913	1	TRIR	AS-BN_vs_AS-BP
0.0019605	0.747081	0.747	0.763	1	MAPKAPK2	AS-BN_vs_AS-BP
0.00196281	0.856697	0.323	0.243	1	NOM1	AS-BN_vs_AS-BP
0.00197193	0.978725	0.318	0.247	1	ARID3A	AS-BN_vs_AS-BP
0.00197349	0.542443	0.682	0.842	1	SYF2	AS-BN_vs_AS-BP
0.00197733	0.344482	0.419	0.513	1	TP53INP2	AS-BN_vs_AS-BP
0.00198943	0.280952	0.187	0.288	1	SLC27A1	AS-BN_vs_AS-BP
0.00201039	0.687176	0.237	0.284	1	ZNRF1	AS-BN_vs_AS-BP
0.00202205	1.09573	0.874	0.854	1	ITGB5	AS-BN_vs_AS-BP
0.00205672	0.357577	0.631	0.843	1	MPHOSPH6	AS-BN_vs_AS-BP
0.00207906	0.643835	0.242	0.382	1	THAP11	AS-BN_vs_AS-BP
0.00208418	0.286737	0.909	0.982	1	SOX11	AS-BN_vs_AS-BP
0.00208585	0.498802	0.884	0.966	1	PAFAH1B1	AS-BN_vs_AS-BP
0.00210178	0.900835	1	0.993	1	UBA52	AS-BN_vs_AS-BP
0.00214927	0.520782	0.864	0.962	1	POLR2K	AS-BN_vs_AS-BP
0.00215701	0.371062	0.879	0.973	1	DGUOK	AS-BN_vs_AS-BP
0.00216559	0.576278	0.687	0.828	1	FBL	AS-BN_vs_AS-BP
0.00216624	0.740183	0.318	0.322	1	TXNIP	AS-BN_vs_AS-BP
0.00219027	0.98451	0.621	0.609	1	LNPEP	AS-BN_vs_AS-BP
0.0022198	0.470969	0.414	0.646	1	POLB	AS-BN_vs_AS-BP
0.0022395	0.373155	0.48	0.652	1	TRIM24	AS-BN_vs_AS-BP
0.00224338	0.273022	0.586	0.796	1	SOAT1	AS-BN_vs_AS-BP
0.00224556	0.980085	0.389	0.485	1	FAM107B	AS-BN_vs_AS-BP
0.00227209	0.417237	0.212	0.336	1	GTF2IRD1	AS-BN_vs_AS-BP
0.00228474	0.320972	0.939	0.991	1	ATP5PO	AS-BN_vs_AS-BP
0.00232982	0.35146	0.616	0.811	1	PLPPR2	AS-BN_vs_AS-BP
0.00233069	0.431421	0.793	0.93	1	GSPT1	AS-BN_vs_AS-BP
0.00233253	0.567808	0.566	0.783	1	UCHL3	AS-BN_vs_AS-BP
0.00234864	0.486595	0.212	0.26	1	MIER2	AS-BN_vs_AS-BP
0.00239766	0.980465	0.566	0.561	1	DYNLL2	AS-BN_vs_AS-BP
0.00241714	0.764123	0.409	0.525	1	TRIM26	AS-BN_vs_AS-BP
0.00242334	0.42033	0.253	0.439	1	ATG2B	AS-BN_vs_AS-BP
0.00242494	0.306284	0.581	0.713	1	STRN4	AS-BN_vs_AS-BP
0.00245821	0.712921	0.843	0.865	1	GOLGA3	AS-BN_vs_AS-BP
0.00245896	0.910117	0.444	0.395	1	CYP1B1	AS-BN_vs_AS-BP
0.00245951	0.648179	0.419	0.586	1	PANK2	AS-BN_vs_AS-BP
0.00247307	0.59678	0.914	0.973	1	RNF181	AS-BN_vs_AS-BP
0.00251068	0.856102	0.631	0.713	1	SLAIN2	AS-BN_vs_AS-BP
0.0025135	0.875659	0.253	0.216	1	PTGR3	AS-BN_vs_AS-BP
0.00252842	0.765478	0.217	0.263	1	CCDC71L	AS-BN_vs_AS-BP
0.00255758	0.569729	0.343	0.272	1	BCORL1	AS-BN_vs_AS-BP
0.00258228	0.71145	0.283	0.232	1	VDR	AS-BN_vs_AS-BP
0.00258587	0.393198	0.566	0.756	1	C19orf12	AS-BN_vs_AS-BP
0.00259139	0.530675	0.561	0.478	1	IRAK1	AS-BN_vs_AS-BP
0.00260532	0.994802	0.677	0.713	1	SH3PXD2B	AS-BN_vs_AS-BP
0.0026119	0.275343	0.753	0.923	1	FEZ2	AS-BN_vs_AS-BP
0.0026558	0.836108	0.348	0.259	1	ATAD3B	AS-BN_vs_AS-BP
0.00267529	0.778734	0.535	0.482	1	CHEK1	AS-BN_vs_AS-BP
0.00267819	0.930599	0.308	0.167	1	PLEKHG3	AS-BN_vs_AS-BP
0.00268197	0.685189	0.535	0.558	1	C14orf132	AS-BN_vs_AS-BP
0.00269387	0.296868	0.717	0.722	1	GBF1	AS-BN_vs_AS-BP
0.00270182	0.650076	0.626	0.756	1	RAB21	AS-BN_vs_AS-BP
0.00271979	0.492043	0.581	0.76	1	RNASEH1	AS-BN_vs_AS-BP
0.00273988	0.33231	0.54	0.751	1	TCAF1	AS-BN_vs_AS-BP
0.00277593	0.550058	0.47	0.608	1	POM121C	AS-BN_vs_AS-BP
0.00279269	0.967739	0.955	0.982	1	MRPL52	AS-BN_vs_AS-BP
0.00279928	0.777224	0.899	0.932	1	NDUFA3	AS-BN_vs_AS-BP
0.00280276	0.538004	0.5	0.689	1	PARL	AS-BN_vs_AS-BP
0.00280416	0.983147	0.424	0.453	1	HOMER1	AS-BN_vs_AS-BP
0.00283942	0.366905	0.232	0.392	1	RUNDC1	AS-BN_vs_AS-BP
0.00284137	0.864223	0.495	0.533	1	REPIN1	AS-BN_vs_AS-BP
0.00288666	0.702769	0.556	0.669	1	ANKRD50	AS-BN_vs_AS-BP
0.0028929	0.436031	0.778	0.852	1	TULP4	AS-BN_vs_AS-BP
0.00292538	0.549802	0.823	0.941	1	DDX18	AS-BN_vs_AS-BP
0.0029406	0.332593	0.348	0.456	1	PTTG1	AS-BN_vs_AS-BP
0.00296121	0.453112	0.354	0.575	1	RNF149	AS-BN_vs_AS-BP
0.00296982	0.910725	0.359	0.383	1	ZHX3	AS-BN_vs_AS-BP
0.00297152	0.680019	0.899	0.954	1	TUG1	AS-BN_vs_AS-BP
0.00297244	0.938178	0.333	0.368	1	PWWP2A	AS-BN_vs_AS-BP
0.00307186	0.54457	0.96	0.969	1	GNAI2	AS-BN_vs_AS-BP
0.00309543	0.731216	0.621	0.623	1	PRKACA	AS-BN_vs_AS-BP
0.00311394	0.252128	0.707	0.893	1	RALA	AS-BN_vs_AS-BP
0.00311401	1.03891	0.288	0.306	1	SCML1	AS-BN_vs_AS-BP
0.0031209	0.673373	0.843	0.895	1	SEC24D	AS-BN_vs_AS-BP
0.00313045	0.515746	0.369	0.485	1	PLAT	AS-BN_vs_AS-BP
0.00314609	0.883264	0.515	0.444	1	KDM4B	AS-BN_vs_AS-BP
0.0031948	0.27324	0.444	0.703	1	SOCS4	AS-BN_vs_AS-BP
0.00321628	0.444858	0.303	0.456	1	CHPT1	AS-BN_vs_AS-BP
0.00323016	1.09986	0.975	0.988	1	NDUFB3	AS-BN_vs_AS-BP
0.00323019	1.40632	0.414	0.371	1	FZD7	AS-BN_vs_AS-BP
0.003233	0.438782	0.924	0.982	1	UQCC2	AS-BN_vs_AS-BP
0.00324673	0.574398	0.525	0.538	1	SFSWAP	AS-BN_vs_AS-BP
0.00326235	0.720942	0.399	0.549	1	PDPR	AS-BN_vs_AS-BP
0.00329128	0.772386	1	1	1	RPL32	AS-BN_vs_AS-BP
0.00329444	0.390835	0.636	0.744	1	GIPC1	AS-BN_vs_AS-BP
0.00331841	0.517203	0.924	0.96	1	GLIPR1	AS-BN_vs_AS-BP
0.00332414	1.07056	0.258	0.185	1	IQGAP2	AS-BN_vs_AS-BP
0.00332824	0.334187	0.263	0.485	1	AMOT	AS-BN_vs_AS-BP
0.00333573	0.870613	0.283	0.38	1	FNIP2	AS-BN_vs_AS-BP
0.00337284	0.509489	0.444	0.639	1	DTWD1	AS-BN_vs_AS-BP
0.00338773	0.653502	0.535	0.676	1	YAF2	AS-BN_vs_AS-BP
0.00340957	0.628764	0.369	0.339	1	ATXN7	AS-BN_vs_AS-BP
0.00341411	0.48882	0.556	0.732	1	UPF3A	AS-BN_vs_AS-BP
0.00344	0.281342	0.318	0.54	1	OXLD1	AS-BN_vs_AS-BP
0.00347652	0.268311	0.475	0.549	1	CHST15	AS-BN_vs_AS-BP
0.00347767	0.934121	0.712	0.717	1	RBPMS	AS-BN_vs_AS-BP
0.00348595	0.675007	0.899	0.964	1	NDUFB6	AS-BN_vs_AS-BP
0.00349227	0.693252	0.253	0.226	1	MAP2K7	AS-BN_vs_AS-BP
0.00349264	0.363067	0.879	0.962	1	TAOK1	AS-BN_vs_AS-BP
0.00362397	0.329147	0.975	0.997	1	SUMO2	AS-BN_vs_AS-BP
0.00362609	0.772075	0.439	0.571	1	SPPL3	AS-BN_vs_AS-BP
0.0036552	0.480296	0.146	0.283	1	AADAT	AS-BN_vs_AS-BP
0.00365904	0.496135	0.616	0.79	1	RFC1	AS-BN_vs_AS-BP
0.00371476	0.360523	0.737	0.92	1	ADNP	AS-BN_vs_AS-BP
0.0037168	0.863634	0.429	0.43	1	ARHGEF17	AS-BN_vs_AS-BP
0.00377906	1.16579	0.995	0.99	1	CDK2AP1	AS-BN_vs_AS-BP
0.00384146	0.460693	0.293	0.246	1	ZDHHC8	AS-BN_vs_AS-BP
0.00389553	0.418302	0.712	0.796	1	DUSP1	AS-BN_vs_AS-BP
0.00393772	0.493783	0.465	0.652	1	CHD7	AS-BN_vs_AS-BP
0.00396463	0.436023	0.727	0.876	1	RUNX2	AS-BN_vs_AS-BP
0.00399174	0.625675	0.985	0.999	1	PSMB2	AS-BN_vs_AS-BP
0.00405783	0.515821	0.369	0.433	1	KALRN	AS-BN_vs_AS-BP
0.00407277	0.591993	0.465	0.57	1	MBD3	AS-BN_vs_AS-BP
0.00408243	0.77497	0.465	0.497	1	LARP1B	AS-BN_vs_AS-BP
0.00411815	0.283762	0.727	0.913	1	LLPH	AS-BN_vs_AS-BP
0.00416318	0.494924	0.167	0.266	1	STS	AS-BN_vs_AS-BP
0.00418649	0.612449	0.833	0.956	1	COX14	AS-BN_vs_AS-BP
0.0041983	0.838799	0.364	0.312	1	DGKH	AS-BN_vs_AS-BP
0.00420936	0.373292	0.606	0.806	1	SF3A1	AS-BN_vs_AS-BP
0.00422306	0.492336	0.727	0.834	1	BLOC1S1	AS-BN_vs_AS-BP
0.0042812	0.378785	0.47	0.689	1	CBFB	AS-BN_vs_AS-BP
0.00430746	0.798237	0.283	0.188	1	ANLN	AS-BN_vs_AS-BP
0.00433347	0.458834	0.222	0.288	1	ZNF236	AS-BN_vs_AS-BP
0.00435004	0.405716	0.247	0.288	1	CLMN	AS-BN_vs_AS-BP
0.00443745	1.30186	0.449	0.294	1	GBP1	AS-BN_vs_AS-BP
0.00444123	0.756511	0.914	0.963	1	GSTO1	AS-BN_vs_AS-BP
0.00444149	0.886618	0.394	0.3	1	CENPB	AS-BN_vs_AS-BP
0.00444821	0.511783	0.545	0.657	1	PKNOX2	AS-BN_vs_AS-BP
0.00450442	0.544697	0.338	0.55	1	RAB11FIP2	AS-BN_vs_AS-BP
0.00451164	0.335844	0.672	0.842	1	BAZ2B	AS-BN_vs_AS-BP
0.00454806	0.838957	0.298	0.503	1	JAZF1	AS-BN_vs_AS-BP
0.00456127	0.511474	0.348	0.577	1	LYSMD1	AS-BN_vs_AS-BP
0.00457024	0.587714	0.384	0.549	1	FARP2	AS-BN_vs_AS-BP
0.00458621	0.732799	0.303	0.463	1	FAM98B	AS-BN_vs_AS-BP
0.00459852	0.733403	0.394	0.256	1	BCL9L	AS-BN_vs_AS-BP
0.00466238	0.975799	0.985	0.985	1	PTP4A2	AS-BN_vs_AS-BP
0.00466271	0.418365	0.646	0.624	1	FASN	AS-BN_vs_AS-BP
0.00467649	0.351459	0.722	0.908	1	GSK3B	AS-BN_vs_AS-BP
0.00469056	0.721196	0.566	0.7	1	LPGAT1	AS-BN_vs_AS-BP
0.00469328	0.900785	0.434	0.504	1	BACE1	AS-BN_vs_AS-BP
0.00473914	0.91864	0.48	0.589	1	DHX33	AS-BN_vs_AS-BP
0.00477393	0.270071	0.192	0.445	1	SUPT3H	AS-BN_vs_AS-BP
0.00482811	0.98914	0.444	0.32	1	SGSM2	AS-BN_vs_AS-BP
0.00486011	0.508336	0.854	0.945	1	SELENOS	AS-BN_vs_AS-BP
0.00487631	0.476302	0.985	0.996	1	MRPL14	AS-BN_vs_AS-BP
0.00496747	0.341148	0.313	0.419	1	HECTD3	AS-BN_vs_AS-BP
0.00499164	1.24656	0.298	0.176	1	MEGF6	AS-BN_vs_AS-BP
0.0049989	0.260968	0.283	0.336	1	ARHGDIB	AS-BN_vs_AS-BP
0.00512696	0.542499	0.919	0.951	1	LSM7	AS-BN_vs_AS-BP
0.00512992	0.393753	0.525	0.712	1	SP1	AS-BN_vs_AS-BP
0.00517267	0.417644	0.667	0.855	1	PTAR1	AS-BN_vs_AS-BP
0.00525503	0.305132	0.54	0.707	1	TCF3	AS-BN_vs_AS-BP
0.00526979	0.585707	0.833	0.922	1	SRP19	AS-BN_vs_AS-BP
0.00527723	0.984175	0.298	0.214	1	BAHD1	AS-BN_vs_AS-BP
0.00528556	0.415567	0.672	0.849	1	LSM8	AS-BN_vs_AS-BP
0.0052876	0.672976	0.227	0.25	1	ITPKB	AS-BN_vs_AS-BP
0.00530836	0.754599	0.545	0.661	1	NBEAL1	AS-BN_vs_AS-BP
0.00541213	0.534339	0.535	0.697	1	AIDA	AS-BN_vs_AS-BP
0.00541332	0.711894	0.611	0.787	1	PTPN12	AS-BN_vs_AS-BP
0.0055364	0.709547	0.742	0.876	1	PPP2R5E	AS-BN_vs_AS-BP
0.00558895	0.406438	0.439	0.686	1	SLMAP	AS-BN_vs_AS-BP
0.0056177	1.35607	0.283	0.164	1	COL6A3	AS-BN_vs_AS-BP
0.00567179	0.851996	0.495	0.469	1	SYDE1	AS-BN_vs_AS-BP
0.00569616	0.503955	1	0.997	1	RPS16	AS-BN_vs_AS-BP
0.00571995	0.542949	0.505	0.636	1	PTPRK	AS-BN_vs_AS-BP
0.00572672	0.556426	0.182	0.26	1	EFHD1	AS-BN_vs_AS-BP
0.00581057	0.397973	0.404	0.686	1	NKAP	AS-BN_vs_AS-BP
0.00581141	0.436898	0.515	0.654	1	ROGDI	AS-BN_vs_AS-BP
0.00592959	0.349297	0.515	0.692	1	PPP3R1	AS-BN_vs_AS-BP
0.00599908	0.887848	0.434	0.327	1	PRR11	AS-BN_vs_AS-BP
0.00600633	0.357956	0.97	0.987	1	CHCHD2	AS-BN_vs_AS-BP
0.00614157	0.596777	0.485	0.673	1	ARL5B	AS-BN_vs_AS-BP
0.00618364	0.68154	0.576	0.663	1	FNBP4	AS-BN_vs_AS-BP
0.00618878	0.850045	0.424	0.417	1	B3GALT6	AS-BN_vs_AS-BP
0.00627379	0.668433	0.788	0.8	1	SUPT5H	AS-BN_vs_AS-BP
0.00627712	0.700817	0.379	0.383	1	RNPEPL1	AS-BN_vs_AS-BP
0.00630124	0.321002	0.308	0.559	1	TSTD3	AS-BN_vs_AS-BP
0.00636414	0.944336	0.298	0.164	1	CELSR3	AS-BN_vs_AS-BP
0.00637182	0.589986	0.343	0.445	1	TFCP2	AS-BN_vs_AS-BP
0.00641646	1.04117	0.227	0.315	1	XRCC4	AS-BN_vs_AS-BP
0.00646825	0.584769	0.485	0.672	1	CNOT11	AS-BN_vs_AS-BP
0.00649761	0.358084	0.813	0.944	1	RSF1	AS-BN_vs_AS-BP
0.006571	0.412491	0.48	0.747	1	GTF2A1	AS-BN_vs_AS-BP
0.00657939	1.19518	0.591	0.516	1	FAM89B	AS-BN_vs_AS-BP
0.00658106	0.81272	0.419	0.552	1	IER5	AS-BN_vs_AS-BP
0.00660803	0.70763	0.692	0.799	1	PEDS1	AS-BN_vs_AS-BP
0.0066159	0.402504	0.591	0.784	1	FRG1	AS-BN_vs_AS-BP
0.00663452	1.17984	0.97	0.932	1	HDGF	AS-BN_vs_AS-BP
0.00665428	0.747652	0.848	0.895	1	ATP2A2	AS-BN_vs_AS-BP
0.00666153	0.52809	1	0.997	1	DAD1	AS-BN_vs_AS-BP
0.00666878	0.696862	0.909	0.911	1	AKAP9	AS-BN_vs_AS-BP
0.0066699	0.276122	0.566	0.8	1	AKT3	AS-BN_vs_AS-BP
0.00669007	0.864958	0.273	0.129	1	SLC16A3	AS-BN_vs_AS-BP
0.00673251	0.804532	0.556	0.655	1	CLOCK	AS-BN_vs_AS-BP
0.00674647	1.08741	0.99	0.954	1	LAMC1	AS-BN_vs_AS-BP
0.00682717	0.265292	0.5	0.754	1	RRAS2	AS-BN_vs_AS-BP
0.00685091	0.601681	0.525	0.538	1	ANK3	AS-BN_vs_AS-BP
0.00688476	0.364403	0.434	0.649	1	ITPRID2	AS-BN_vs_AS-BP
0.00689165	0.795677	0.995	1	1	POLR2L	AS-BN_vs_AS-BP
0.00695331	0.760698	0.737	0.788	1	POMK	AS-BN_vs_AS-BP
0.00695573	0.925174	0.338	0.21	1	H2AC20	AS-BN_vs_AS-BP
0.00701251	0.28165	0.975	1	1	SNU13	AS-BN_vs_AS-BP
0.00719509	0.780079	0.455	0.623	1	RRAGC	AS-BN_vs_AS-BP
0.00723086	0.414519	0.949	0.988	1	ANAPC11	AS-BN_vs_AS-BP
0.00724211	1.22102	0.556	0.448	1	DCBLD1	AS-BN_vs_AS-BP
0.00725516	0.805523	0.475	0.556	1	NR2F6	AS-BN_vs_AS-BP
0.00728919	0.571912	0.894	0.947	1	MICOS13	AS-BN_vs_AS-BP
0.00735105	0.628662	0.692	0.852	1	MRPS36	AS-BN_vs_AS-BP
0.00735192	0.448605	0.374	0.587	1	TERF2	AS-BN_vs_AS-BP
0.00737303	0.940845	0.419	0.305	1	ANKS1A	AS-BN_vs_AS-BP
0.007518	1.14542	0.384	0.277	1	COPZ2	AS-BN_vs_AS-BP
0.00757481	0.542063	0.864	0.936	1	EIF3J	AS-BN_vs_AS-BP
0.00760507	0.477157	0.646	0.802	1	ARID1B	AS-BN_vs_AS-BP
0.0077377	0.960619	0.995	0.997	1	COX6B1	AS-BN_vs_AS-BP
0.00776089	0.600271	0.288	0.354	1	ZNF432	AS-BN_vs_AS-BP
0.00785164	0.964825	0.894	0.951	1	MCTS1	AS-BN_vs_AS-BP
0.00785367	1.00952	0.283	0.286	1	NEGR1	AS-BN_vs_AS-BP
0.00794935	0.337003	0.192	0.305	1	OLFM1	AS-BN_vs_AS-BP
0.00801643	0.556841	0.328	0.32	1	MAPK12	AS-BN_vs_AS-BP
0.00806478	0.360749	0.343	0.586	1	BRPF3	AS-BN_vs_AS-BP
0.00813207	0.6169	0.621	0.78	1	RNASEH2C	AS-BN_vs_AS-BP
0.00813298	0.640748	0.333	0.42	1	SLC25A16	AS-BN_vs_AS-BP
0.00814288	0.354112	0.611	0.784	1	MZT2A	AS-BN_vs_AS-BP
0.00820219	0.649598	0.924	0.973	1	C1orf122	AS-BN_vs_AS-BP
0.00822754	0.933332	0.828	0.774	1	UBE2M	AS-BN_vs_AS-BP
0.00824575	0.285932	0.626	0.834	1	WAPL	AS-BN_vs_AS-BP
0.0083337	0.31745	0.869	0.922	1	TNRC6B	AS-BN_vs_AS-BP
0.00835784	0.524752	0.374	0.5	1	DPY19L1	AS-BN_vs_AS-BP
0.00839674	0.301738	0.253	0.479	1	TMEM243	AS-BN_vs_AS-BP
0.00846225	0.391758	0.52	0.72	1	CEP290	AS-BN_vs_AS-BP
0.0084892	0.540823	0.783	0.857	1	ELK3	AS-BN_vs_AS-BP
0.00866547	0.564797	0.949	0.988	1	PDLIM5	AS-BN_vs_AS-BP
0.00883191	0.714436	0.641	0.787	1	RRP36	AS-BN_vs_AS-BP
0.00885707	0.306079	0.692	0.833	1	PDXDC1	AS-BN_vs_AS-BP
0.00894035	1.13582	0.288	0.272	1	TMSB15A	AS-BN_vs_AS-BP
0.00895405	0.83396	0.692	0.738	1	PHC2	AS-BN_vs_AS-BP
0.00900773	0.685646	0.222	0.333	1	TSHZ3	AS-BN_vs_AS-BP
0.00901431	0.690226	0.449	0.401	1	UBN1	AS-BN_vs_AS-BP
0.00909365	0.891718	0.97	0.973	1	FERMT2	AS-BN_vs_AS-BP
0.00922672	0.805269	0.46	0.398	1	USF2	AS-BN_vs_AS-BP
0.0093192	0.695685	0.318	0.388	1	CERS6	AS-BN_vs_AS-BP
0.00932588	0.612442	0.576	0.772	1	RAB22A	AS-BN_vs_AS-BP
0.00933375	0.428814	0.217	0.343	1	USP31	AS-BN_vs_AS-BP
0.00948702	0.696505	0.626	0.689	1	CYLD	AS-BN_vs_AS-BP
0.00960694	0.494922	0.455	0.549	1	HEXIM1	AS-BN_vs_AS-BP
0.00963563	0.540806	0.237	0.334	1	DUSP7	AS-BN_vs_AS-BP
0.00965046	0.648337	0.833	0.871	1	SELENON	AS-BN_vs_AS-BP
0.00968713	0.393522	0.187	0.385	1	PIGV	AS-BN_vs_AS-BP
0.00969076	0.89882	0.722	0.83	1	PHF20L1	AS-BN_vs_AS-BP
0.0097369	0.802656	0.313	0.438	1	CENPC	AS-BN_vs_AS-BP
0.00976531	0.300795	0.384	0.568	1	SYT1	AS-BN_vs_AS-BP
0.00988123	0.811937	0.556	0.627	1	ZFC3H1	AS-BN_vs_AS-BP
0.0100207	0.503821	0.384	0.561	1	GMNN	AS-BN_vs_AS-BP
0.0100502	0.54944	0.424	0.334	1	SLC22A17	AS-BN_vs_AS-BP
0.0100539	0.607091	0.419	0.435	1	PEX26	AS-BN_vs_AS-BP
0.0100554	0.420239	0.374	0.513	1	VPS37B	AS-BN_vs_AS-BP
0.0100668	0.685464	0.98	0.999	1	PRDX6	AS-BN_vs_AS-BP
0.0103048	0.730854	0.47	0.321	1	DNM1	AS-BN_vs_AS-BP
0.0103486	0.776499	0.571	0.528	1	TLE3	AS-BN_vs_AS-BP
0.0103772	0.600288	0.485	0.652	1	PPP2R3A	AS-BN_vs_AS-BP
0.0104165	0.68011	1	1	1	SSR4	AS-BN_vs_AS-BP
0.0104246	0.471154	0.53	0.638	1	PXN	AS-BN_vs_AS-BP
0.0104439	0.816018	0.843	0.925	1	ITGAE	AS-BN_vs_AS-BP
0.0105157	0.300781	0.707	0.908	1	ERGIC2	AS-BN_vs_AS-BP
0.0105501	0.822238	0.303	0.217	1	RPL39L	AS-BN_vs_AS-BP
0.0106175	0.273562	0.601	0.781	1	CYP20A1	AS-BN_vs_AS-BP
0.0106361	0.691365	0.364	0.507	1	THAP12	AS-BN_vs_AS-BP
0.0106525	1.21333	0.419	0.324	1	P4HA3	AS-BN_vs_AS-BP
0.010674	0.791741	0.49	0.675	1	CETN3	AS-BN_vs_AS-BP
0.0106782	0.825262	0.727	0.8	1	NDUFAF2	AS-BN_vs_AS-BP
0.010779	0.697816	0.313	0.359	1	TTBK2	AS-BN_vs_AS-BP
0.0108062	0.289633	0.379	0.331	1	ARHGEF1	AS-BN_vs_AS-BP
0.0108139	0.252322	0.333	0.556	1	NLK	AS-BN_vs_AS-BP
0.0108251	0.399513	0.581	0.769	1	MPHOSPH8	AS-BN_vs_AS-BP
0.0108277	0.643908	0.51	0.646	1	PDE4DIP	AS-BN_vs_AS-BP
0.0108498	0.349551	0.364	0.583	1	ZDHHC2	AS-BN_vs_AS-BP
0.0108625	0.835648	0.5	0.55	1	DENND5B	AS-BN_vs_AS-BP
0.0108669	0.904106	0.399	0.331	1	INTS1	AS-BN_vs_AS-BP
0.0108683	0.387688	0.753	0.874	1	BIRC6	AS-BN_vs_AS-BP
0.0110801	0.258936	0.747	0.922	1	PANK3	AS-BN_vs_AS-BP
0.0111024	0.580641	0.571	0.639	1	AGO3	AS-BN_vs_AS-BP
0.0112639	1.03683	0.687	0.723	1	BICC1	AS-BN_vs_AS-BP
0.0113737	0.508949	0.217	0.354	1	MMAA	AS-BN_vs_AS-BP
0.0113763	0.410398	0.646	0.828	1	NSRP1	AS-BN_vs_AS-BP
0.0114068	1.0257	0.727	0.669	1	MXD4	AS-BN_vs_AS-BP
0.0114551	0.557028	0.313	0.463	1	NAP1L5	AS-BN_vs_AS-BP
0.011498	1.1739	0.99	0.979	1	COPS9	AS-BN_vs_AS-BP
0.0118797	0.438654	0.308	0.42	1	PIK3CB	AS-BN_vs_AS-BP
0.0120097	0.754186	0.682	0.791	1	EML4	AS-BN_vs_AS-BP
0.0120411	0.950727	0.571	0.564	1	PCNX1	AS-BN_vs_AS-BP
0.0120766	0.718527	0.561	0.544	1	POFUT2	AS-BN_vs_AS-BP
0.0121346	0.280712	0.753	0.868	1	MRPL41	AS-BN_vs_AS-BP
0.0122677	0.474211	0.939	0.987	1	PPP1R12A	AS-BN_vs_AS-BP
0.0123208	0.769671	0.338	0.268	1	DGKZ	AS-BN_vs_AS-BP
0.012346	0.73871	0.646	0.609	1	SPG7	AS-BN_vs_AS-BP
0.0123673	0.425662	0.879	0.96	1	WAC	AS-BN_vs_AS-BP
0.0124292	0.462779	0.854	0.905	1	SMARCA4	AS-BN_vs_AS-BP
0.0124556	0.64889	0.374	0.451	1	SMIM27	AS-BN_vs_AS-BP
0.0125319	0.404028	0.727	0.865	1	MAN1A2	AS-BN_vs_AS-BP
0.0126531	0.85728	0.732	0.79	1	AMOTL1	AS-BN_vs_AS-BP
0.0126636	0.470536	0.601	0.753	1	INTU	AS-BN_vs_AS-BP
0.0127968	0.777662	0.273	0.265	1	TMEM54	AS-BN_vs_AS-BP
0.0128086	0.931145	0.434	0.457	1	PTPN21	AS-BN_vs_AS-BP
0.0128272	0.744212	0.227	0.291	1	ITPR1	AS-BN_vs_AS-BP
0.0128411	0.260217	0.303	0.351	1	MEN1	AS-BN_vs_AS-BP
0.0134319	0.779493	0.419	0.51	1	TMEM65	AS-BN_vs_AS-BP
0.0134822	0.509783	0.591	0.75	1	SPATS2	AS-BN_vs_AS-BP
0.0134909	0.63772	0.293	0.169	1	PGGHG	AS-BN_vs_AS-BP
0.0135674	0.406256	0.429	0.655	1	POLR1H	AS-BN_vs_AS-BP
0.0136827	0.386013	0.753	0.896	1	EIF1AX	AS-BN_vs_AS-BP
0.0136972	0.615798	0.702	0.846	1	URI1	AS-BN_vs_AS-BP
0.013708	0.436961	0.394	0.578	1	AHR	AS-BN_vs_AS-BP
0.0138486	0.298606	0.96	0.993	1	SF3B1	AS-BN_vs_AS-BP
0.0138947	0.635324	0.46	0.45	1	PTPN23	AS-BN_vs_AS-BP
0.0140305	0.52165	0.672	0.754	1	ERC1	AS-BN_vs_AS-BP
0.0140757	0.435006	1	1	1	RPL27A	AS-BN_vs_AS-BP
0.014104	0.781901	0.273	0.244	1	LYST	AS-BN_vs_AS-BP
0.014344	0.291786	0.586	0.79	1	ELAVL1	AS-BN_vs_AS-BP
0.0144612	0.810541	0.364	0.331	1	PHF1	AS-BN_vs_AS-BP
0.0144717	0.981184	0.707	0.741	1	CEP350	AS-BN_vs_AS-BP
0.0144798	0.663191	0.631	0.763	1	TNKS2	AS-BN_vs_AS-BP
0.0146005	0.453204	0.328	0.405	1	PPARA	AS-BN_vs_AS-BP
0.0146555	0.757802	0.389	0.41	1	EPG5	AS-BN_vs_AS-BP
0.0146823	0.357715	0.303	0.581	1	RXYLT1	AS-BN_vs_AS-BP
0.0148276	0.495556	0.646	0.712	1	CAPN1	AS-BN_vs_AS-BP
0.0150838	0.287085	0.51	0.74	1	ELMOD2	AS-BN_vs_AS-BP
0.0151142	1.06466	0.894	0.902	1	RHOB	AS-BN_vs_AS-BP
0.0152747	0.32896	0.52	0.694	1	POGZ	AS-BN_vs_AS-BP
0.0154606	0.827522	0.54	0.611	1	CSNK1G1	AS-BN_vs_AS-BP
0.0154683	0.905709	0.298	0.339	1	ZCCHC3	AS-BN_vs_AS-BP
0.0155547	0.533067	0.879	0.967	1	NBDY	AS-BN_vs_AS-BP
0.0155633	0.460917	0.242	0.336	1	DENND1B	AS-BN_vs_AS-BP
0.015628	0.944316	0.995	0.991	1	ATP5MJ	AS-BN_vs_AS-BP
0.0157034	0.440053	0.571	0.74	1	TBC1D20	AS-BN_vs_AS-BP
0.0158494	0.610901	0.207	0.29	1	CDC42	AS-BN_vs_AS-BP
0.015896	0.936218	0.253	0.203	1	TIMM29	AS-BN_vs_AS-BP
0.0159226	0.580477	0.485	0.68	1	PCGF3	AS-BN_vs_AS-BP
0.015932	1.20327	0.995	0.984	1	RAC1	AS-BN_vs_AS-BP
0.0160405	0.770023	0.641	0.76	1	SNX18	AS-BN_vs_AS-BP
0.0162379	0.92962	0.697	0.595	1	MEIS3	AS-BN_vs_AS-BP
0.0162937	0.380861	0.803	0.898	1	C4orf48	AS-BN_vs_AS-BP
0.0163212	0.888317	0.803	0.788	1	PSME4	AS-BN_vs_AS-BP
0.0163446	0.553643	0.975	0.984	1	TIMM8B	AS-BN_vs_AS-BP
0.0164044	0.313264	0.808	0.956	1	CFL2	AS-BN_vs_AS-BP
0.0165104	0.367296	1	0.999	1	PPP1CB	AS-BN_vs_AS-BP
0.0165433	0.46472	0.672	0.657	1	FCF1	AS-BN_vs_AS-BP
0.0166295	0.511221	0.581	0.717	1	TRIM56	AS-BN_vs_AS-BP
0.016654	0.463633	0.576	0.685	1	ARHGAP35	AS-BN_vs_AS-BP
0.0166767	0.271557	0.783	0.879	1	CELF1	AS-BN_vs_AS-BP
0.016885	0.626265	0.424	0.507	1	TRIM8	AS-BN_vs_AS-BP
0.0170304	0.441248	0.268	0.496	1	NSMCE3	AS-BN_vs_AS-BP
0.0173315	0.286745	0.177	0.26	1	FKBP1B	AS-BN_vs_AS-BP
0.0175345	0.376744	0.364	0.543	1	ZKSCAN8	AS-BN_vs_AS-BP
0.0175528	0.331845	0.783	0.907	1	EIF2AK4	AS-BN_vs_AS-BP
0.0176183	0.299959	0.49	0.624	1	EHMT1	AS-BN_vs_AS-BP
0.0176448	0.273567	0.182	0.376	1	CYP2U1	AS-BN_vs_AS-BP
0.0177395	0.792388	0.49	0.428	1	DIAPH1	AS-BN_vs_AS-BP
0.0179144	0.70675	0.965	0.991	1	ATP5PF	AS-BN_vs_AS-BP
0.0179907	0.47547	0.737	0.842	1	COLGALT1	AS-BN_vs_AS-BP
0.0179971	0.258794	0.955	0.99	1	STMP1	AS-BN_vs_AS-BP
0.0181008	0.745144	0.429	0.457	1	DCLK2	AS-BN_vs_AS-BP
0.018127	0.61584	0.253	0.206	1	SPINDOC	AS-BN_vs_AS-BP
0.0182822	0.498303	0.778	0.833	1	AAK1	AS-BN_vs_AS-BP
0.0183646	0.286999	0.424	0.695	1	SUCLG2	AS-BN_vs_AS-BP
0.0185058	0.264091	0.303	0.24	1	A2M	AS-BN_vs_AS-BP
0.0185942	0.436339	0.455	0.673	1	ARID2	AS-BN_vs_AS-BP
0.0186208	0.252906	0.576	0.701	1	TOB2	AS-BN_vs_AS-BP
0.0186814	0.343707	0.167	0.376	1	KTI12	AS-BN_vs_AS-BP
0.0187167	0.581105	0.359	0.45	1	VPS54	AS-BN_vs_AS-BP
0.0189356	0.63752	0.965	0.991	1	TRMT112	AS-BN_vs_AS-BP
0.0190121	0.461516	1	0.999	1	ATP5MC3	AS-BN_vs_AS-BP
0.0191722	0.398146	0.364	0.638	1	USP1	AS-BN_vs_AS-BP
0.0192244	1.18804	0.283	0.191	1	STXBP5	AS-BN_vs_AS-BP
0.0192342	0.268282	0.626	0.762	1	ZFHX3	AS-BN_vs_AS-BP
0.0193016	0.451844	0.581	0.686	1	MECP2	AS-BN_vs_AS-BP
0.0194644	0.600401	0.242	0.315	1	CDKL5	AS-BN_vs_AS-BP
0.0194806	0.325736	0.288	0.404	1	SIAH2	AS-BN_vs_AS-BP
0.019918	0.31144	0.424	0.536	1	ZNF621	AS-BN_vs_AS-BP
0.0200009	0.61544	0.551	0.561	1	CAD	AS-BN_vs_AS-BP
0.0200435	0.641786	0.283	0.169	1	JCAD	AS-BN_vs_AS-BP
0.0200455	0.317631	0.283	0.488	1	ARSK	AS-BN_vs_AS-BP
0.0200838	0.492676	0.348	0.575	1	PPM1B	AS-BN_vs_AS-BP
0.020121	0.532681	0.313	0.499	1	VPS13A	AS-BN_vs_AS-BP
0.0201481	0.334357	0.924	0.945	1	CXXC5	AS-BN_vs_AS-BP
0.0203699	0.784398	0.914	0.886	1	LOXL2	AS-BN_vs_AS-BP
0.0203865	0.557815	0.98	0.973	1	ZYX	AS-BN_vs_AS-BP
0.0203944	1.02521	0.596	0.425	1	ULK1	AS-BN_vs_AS-BP
0.0205142	0.92907	0.737	0.704	1	SPECC1	AS-BN_vs_AS-BP
0.02053	0.505814	0.753	0.864	1	MED13	AS-BN_vs_AS-BP
0.0205803	0.712134	0.444	0.385	1	PIP5K1C	AS-BN_vs_AS-BP
0.0205839	0.521539	0.53	0.578	1	CHPF2	AS-BN_vs_AS-BP
0.0206859	0.440818	0.742	0.88	1	TMEM245	AS-BN_vs_AS-BP
0.0207778	0.39639	0.207	0.306	1	NOL3	AS-BN_vs_AS-BP
0.0210179	0.672803	0.424	0.391	1	NUMBL	AS-BN_vs_AS-BP
0.0211103	0.309612	0.167	0.309	1	MTMR1	AS-BN_vs_AS-BP
0.0211165	0.546738	0.561	0.645	1	GRB10	AS-BN_vs_AS-BP
0.0215072	0.734476	0.778	0.703	1	SH3GL1	AS-BN_vs_AS-BP
0.0217221	0.445488	0.833	0.925	1	SHROOM3	AS-BN_vs_AS-BP
0.0217665	0.264778	0.157	0.321	1	MT1F	AS-BN_vs_AS-BP
0.0221046	0.469735	0.167	0.25	1	KLF9	AS-BN_vs_AS-BP
0.0221299	0.39138	0.51	0.709	1	CRELD2	AS-BN_vs_AS-BP
0.0223963	0.704373	0.354	0.393	1	ZNF444	AS-BN_vs_AS-BP
0.0225631	0.651453	0.576	0.649	1	R3HDM4	AS-BN_vs_AS-BP
0.0225823	0.412241	0.298	0.478	1	ATP7A	AS-BN_vs_AS-BP
0.0227443	0.258175	0.303	0.476	1	SMAP2	AS-BN_vs_AS-BP
0.0230216	0.871791	1	0.996	1	NEDD8	AS-BN_vs_AS-BP
0.0230643	0.284499	0.409	0.544	1	KIAA0930	AS-BN_vs_AS-BP
0.0231042	0.283608	0.187	0.284	1	ADAMTS10	AS-BN_vs_AS-BP
0.0232114	0.504359	0.611	0.822	1	CHMP2B	AS-BN_vs_AS-BP
0.0232185	0.928189	0.551	0.357	1	CNN1	AS-BN_vs_AS-BP
0.0232333	0.46357	0.313	0.436	1	OXTR	AS-BN_vs_AS-BP
0.0232877	0.520328	0.758	0.854	1	ARHGAP21	AS-BN_vs_AS-BP
0.0236049	0.985539	0.5	0.34	1	SAMD1	AS-BN_vs_AS-BP
0.02368	0.322201	0.303	0.456	1	PKNOX1	AS-BN_vs_AS-BP
0.0237088	0.391787	0.54	0.615	1	POLR1A	AS-BN_vs_AS-BP
0.0238411	0.98426	0.293	0.321	1	MGST2	AS-BN_vs_AS-BP
0.0239389	0.367325	0.369	0.518	1	CCS	AS-BN_vs_AS-BP
0.0239669	0.261769	0.414	0.547	1	EHMT2	AS-BN_vs_AS-BP
0.0239725	0.292664	0.217	0.321	1	ZNF611	AS-BN_vs_AS-BP
0.0239886	0.825988	0.677	0.657	1	DNM2	AS-BN_vs_AS-BP
0.0240309	0.763597	0.414	0.463	1	ARHGAP23	AS-BN_vs_AS-BP
0.0241287	0.633471	0.283	0.204	1	PDE4A	AS-BN_vs_AS-BP
0.0242339	0.650955	0.288	0.37	1	CDK19	AS-BN_vs_AS-BP
0.0244439	0.658252	0.318	0.349	1	ANKRD36	AS-BN_vs_AS-BP
0.0246745	0.403329	0.864	0.942	1	KMT2E	AS-BN_vs_AS-BP
0.0247074	0.934288	0.571	0.515	1	NENF	AS-BN_vs_AS-BP
0.0247954	0.801634	0.556	0.652	1	HEBP2	AS-BN_vs_AS-BP
0.0248582	0.403948	0.308	0.488	1	KCTD3	AS-BN_vs_AS-BP
0.0249008	0.671791	0.97	0.996	1	NDUFB11	AS-BN_vs_AS-BP
0.0249042	0.751029	0.253	0.259	1	AKAP17A	AS-BN_vs_AS-BP
0.0251623	0.366347	0.389	0.49	1	KIAA2013	AS-BN_vs_AS-BP
0.0251678	0.496162	0.212	0.315	1	SLC36A1	AS-BN_vs_AS-BP
0.0253972	0.419106	0.98	0.991	1	LDHB	AS-BN_vs_AS-BP
0.0254293	0.84051	0.384	0.37	1	HPCAL1	AS-BN_vs_AS-BP
0.0254835	0.354247	0.96	0.982	1	NME4	AS-BN_vs_AS-BP
0.0256148	0.351662	0.202	0.32	1	SRGAP3	AS-BN_vs_AS-BP
0.0256818	0.501868	0.47	0.614	1	LRP12	AS-BN_vs_AS-BP
0.0257585	0.336901	0.263	0.428	1	C21orf91	AS-BN_vs_AS-BP
0.0258971	0.281777	0.657	0.831	1	TEX261	AS-BN_vs_AS-BP
0.0259011	0.379349	0.692	0.772	1	ZEB2	AS-BN_vs_AS-BP
0.0265477	0.973906	0.323	0.132	1	HIC1	AS-BN_vs_AS-BP
0.0265643	0.752128	0.687	0.765	1	SLC35E1	AS-BN_vs_AS-BP
0.0267689	0.322759	0.374	0.531	1	DVL2	AS-BN_vs_AS-BP
0.026882	0.297634	0.465	0.663	1	C2orf49	AS-BN_vs_AS-BP
0.0271302	0.443499	0.687	0.78	1	FAM222B	AS-BN_vs_AS-BP
0.0272134	0.513773	0.591	0.768	1	TOMM70	AS-BN_vs_AS-BP
0.027215	0.666225	0.288	0.392	1	LHFPL2	AS-BN_vs_AS-BP
0.0273303	0.314816	0.379	0.479	1	MID1IP1	AS-BN_vs_AS-BP
0.027511	0.251464	0.551	0.729	1	TASOR2	AS-BN_vs_AS-BP
0.0276442	0.392589	0.606	0.734	1	ZNF292	AS-BN_vs_AS-BP
0.027708	0.631852	0.207	0.257	1	HS6ST2	AS-BN_vs_AS-BP
0.0277449	0.46674	0.505	0.608	1	GTF3C1	AS-BN_vs_AS-BP
0.0277704	0.739335	0.823	0.896	1	LUC7L3	AS-BN_vs_AS-BP
0.0277854	0.276871	0.384	0.571	1	PTPN9	AS-BN_vs_AS-BP
0.0279348	0.259318	0.429	0.479	1	PIAS4	AS-BN_vs_AS-BP
0.0279972	0.409429	0.404	0.445	1	SURF6	AS-BN_vs_AS-BP
0.0279986	0.829995	0.495	0.506	1	DIAPH3	AS-BN_vs_AS-BP
0.0282805	0.45656	0.545	0.701	1	HRAS	AS-BN_vs_AS-BP
0.0283472	0.450862	0.303	0.422	1	DYNC2I1	AS-BN_vs_AS-BP
0.0289396	0.367541	0.5	0.675	1	RALGAPB	AS-BN_vs_AS-BP
0.0291038	0.428742	0.98	0.991	1	DDX17	AS-BN_vs_AS-BP
0.0292574	0.601321	0.949	0.985	1	SH3GLB1	AS-BN_vs_AS-BP
0.0294667	0.416905	0.389	0.627	1	SPRED1	AS-BN_vs_AS-BP
0.0294845	0.625173	0.561	0.709	1	TMEM45A	AS-BN_vs_AS-BP
0.0294874	0.667375	0.318	0.396	1	ARHGEF11	AS-BN_vs_AS-BP
0.0295221	0.882195	0.278	0.312	1	LIPG	AS-BN_vs_AS-BP
0.0296784	0.271852	0.828	0.879	1	POLR2A	AS-BN_vs_AS-BP
0.0297048	0.91251	0.687	0.685	1	MICALL1	AS-BN_vs_AS-BP
0.0298104	0.331672	0.318	0.287	1	ATP8B2	AS-BN_vs_AS-BP
0.0298174	0.355308	0.369	0.481	1	TP53I11	AS-BN_vs_AS-BP
0.0298928	0.893885	0.47	0.522	1	ENTREP3	AS-BN_vs_AS-BP
0.0300369	0.414388	1	1	1	ATP5MC2	AS-BN_vs_AS-BP
0.0300458	0.26814	0.939	0.982	1	DYNC1I2	AS-BN_vs_AS-BP
0.0302111	0.533421	0.636	0.714	1	MPRIP	AS-BN_vs_AS-BP
0.0304346	0.364726	0.444	0.661	1	R3HDM2	AS-BN_vs_AS-BP
0.0305968	0.674307	0.955	0.984	1	TXNDC17	AS-BN_vs_AS-BP
0.030689	0.754031	0.48	0.365	1	DMWD	AS-BN_vs_AS-BP
0.0308036	0.337432	0.747	0.892	1	P4HA1	AS-BN_vs_AS-BP
0.0308645	0.792569	0.258	0.351	1	FOXJ2	AS-BN_vs_AS-BP
0.0308766	0.53897	0.288	0.388	1	CHST12	AS-BN_vs_AS-BP
0.0308808	0.892588	0.444	0.518	1	FUOM	AS-BN_vs_AS-BP
0.0309677	1.07038	0.318	0.327	1	PDZRN3	AS-BN_vs_AS-BP
0.031052	0.332972	0.217	0.358	1	SGMS2	AS-BN_vs_AS-BP
0.0312398	0.917247	0.99	0.991	1	ATP5MC1	AS-BN_vs_AS-BP
0.0313648	0.484761	0.379	0.47	1	CWF19L2	AS-BN_vs_AS-BP
0.0314638	0.356942	0.717	0.732	1	PRRC2A	AS-BN_vs_AS-BP
0.0316843	0.31902	0.717	0.799	1	NUP62	AS-BN_vs_AS-BP
0.0317243	0.428472	0.667	0.83	1	GOLGA5	AS-BN_vs_AS-BP
0.0318486	0.576242	0.258	0.364	1	ZNF746	AS-BN_vs_AS-BP
0.0320415	0.683322	0.308	0.283	1	SFXN5	AS-BN_vs_AS-BP
0.0320705	0.619196	0.359	0.29	1	PCNX3	AS-BN_vs_AS-BP
0.0321562	0.609752	0.601	0.728	1	ZNF362	AS-BN_vs_AS-BP
0.0323093	0.984613	0.732	0.768	1	CHSY1	AS-BN_vs_AS-BP
0.0328673	0.308538	0.379	0.592	1	UBAC1	AS-BN_vs_AS-BP
0.0331826	0.548979	0.434	0.411	1	HOMER2	AS-BN_vs_AS-BP
0.0331884	0.259192	0.242	0.349	1	PHLPP1	AS-BN_vs_AS-BP
0.033289	1.12717	0.273	0.217	1	MEX3B	AS-BN_vs_AS-BP
0.0333869	0.537093	0.606	0.691	1	FOXO3	AS-BN_vs_AS-BP
0.0337589	0.482025	0.515	0.584	1	SIN3B	AS-BN_vs_AS-BP
0.0339818	0.619114	0.389	0.553	1	NAA30	AS-BN_vs_AS-BP
0.0339966	0.62359	0.51	0.642	1	MOB1B	AS-BN_vs_AS-BP
0.0340236	0.452967	0.323	0.371	1	GAK	AS-BN_vs_AS-BP
0.0342278	0.655654	0.995	0.997	1	SSR3	AS-BN_vs_AS-BP
0.034261	0.713943	0.268	0.293	1	GABPB2	AS-BN_vs_AS-BP
0.0346204	0.535721	0.343	0.287	1	MEF2C	AS-BN_vs_AS-BP
0.0347315	0.574914	0.293	0.263	1	TIAM2	AS-BN_vs_AS-BP
0.0348621	0.407472	0.404	0.475	1	ZNF609	AS-BN_vs_AS-BP
0.0349202	0.573529	0.495	0.667	1	DNAL1	AS-BN_vs_AS-BP
0.0351141	0.51356	0.763	0.902	1	SIVA1	AS-BN_vs_AS-BP
0.0351229	0.514313	0.485	0.473	1	CTIF	AS-BN_vs_AS-BP
0.0351811	0.576293	0.212	0.303	1	NUDT19	AS-BN_vs_AS-BP
0.0354535	0.854485	0.308	0.364	1	PAQR3	AS-BN_vs_AS-BP
0.0355487	1.01342	0.283	0.337	1	RDH10	AS-BN_vs_AS-BP
0.0360605	0.610514	0.697	0.726	1	GCN1	AS-BN_vs_AS-BP
0.0360832	0.372377	0.788	0.873	1	ANKIB1	AS-BN_vs_AS-BP
0.0361827	0.356398	0.596	0.72	1	ARFGEF1	AS-BN_vs_AS-BP
0.0362397	0.505167	0.288	0.333	1	GPR176	AS-BN_vs_AS-BP
0.0364161	0.558968	0.52	0.676	1	CCDC59	AS-BN_vs_AS-BP
0.0365657	0.34302	0.924	0.928	1	HUWE1	AS-BN_vs_AS-BP
0.0366511	0.625107	0.884	0.877	1	GNB2	AS-BN_vs_AS-BP
0.0368057	0.520805	0.48	0.561	1	SVIL	AS-BN_vs_AS-BP
0.0368999	0.694281	0.545	0.649	1	KANSL1	AS-BN_vs_AS-BP
0.0371847	0.309699	0.657	0.808	1	CEBPZ	AS-BN_vs_AS-BP
0.0373006	0.759879	0.429	0.484	1	IGDCC4	AS-BN_vs_AS-BP
0.0373024	0.330801	0.318	0.439	1	PBXIP1	AS-BN_vs_AS-BP
0.0373032	0.634111	0.495	0.633	1	MEX3C	AS-BN_vs_AS-BP
0.0376089	0.271711	0.525	0.738	1	ATOSB	AS-BN_vs_AS-BP
0.0377241	0.333068	0.52	0.698	1	ARMH4	AS-BN_vs_AS-BP
0.0377373	0.907468	0.773	0.852	1	ARID1A	AS-BN_vs_AS-BP
0.0378116	0.729963	0.601	0.567	1	MGAT4B	AS-BN_vs_AS-BP
0.0378547	0.572654	0.389	0.435	1	BCAS4	AS-BN_vs_AS-BP
0.0380154	1.03042	0.439	0.337	1	HNRNPUL2	AS-BN_vs_AS-BP
0.0382903	0.649121	0.475	0.626	1	TPST1	AS-BN_vs_AS-BP
0.038389	0.524069	0.561	0.683	1	PRKD3	AS-BN_vs_AS-BP
0.0388484	0.678758	0.409	0.504	1	RBM33	AS-BN_vs_AS-BP
0.0389093	0.66457	0.409	0.479	1	TPD52L1	AS-BN_vs_AS-BP
0.0390451	0.397651	0.131	0.253	1	ZNF175	AS-BN_vs_AS-BP
0.0391823	0.487689	0.551	0.661	1	CTSC	AS-BN_vs_AS-BP
0.039259	0.781338	0.328	0.305	1	MFSD4B	AS-BN_vs_AS-BP
0.0396688	0.429139	0.859	0.92	1	ZMAT3	AS-BN_vs_AS-BP
0.0398115	0.685116	0.732	0.783	1	TNRC6A	AS-BN_vs_AS-BP
0.0398128	0.317686	0.348	0.53	1	OTUD4	AS-BN_vs_AS-BP
0.0398183	0.672738	0.54	0.469	1	ST3GAL2	AS-BN_vs_AS-BP
0.0399576	0.32291	0.939	0.988	1	RAB31	AS-BN_vs_AS-BP
0.0400015	0.39495	0.253	0.451	1	BMT2	AS-BN_vs_AS-BP
0.0401554	0.379287	0.172	0.318	1	MED17	AS-BN_vs_AS-BP
0.0406574	0.495206	0.53	0.62	1	INTS6	AS-BN_vs_AS-BP
0.0407157	0.808562	0.247	0.269	1	NCALD	AS-BN_vs_AS-BP
0.0410169	0.763243	0.258	0.207	1	MIGA2	AS-BN_vs_AS-BP
0.0414765	0.28285	0.551	0.762	1	LARP7	AS-BN_vs_AS-BP
0.0418142	0.548481	0.545	0.768	1	SRSF8	AS-BN_vs_AS-BP
0.0420666	0.76629	0.434	0.536	1	KCTD9	AS-BN_vs_AS-BP
0.0422035	0.278033	0.692	0.808	1	PTPN1	AS-BN_vs_AS-BP
0.0424852	0.462525	0.955	0.964	1	RBFOX2	AS-BN_vs_AS-BP
0.0425756	0.292682	0.919	0.959	1	TUBB6	AS-BN_vs_AS-BP
0.043163	0.472292	0.545	0.646	1	NFAT5	AS-BN_vs_AS-BP
0.0434165	0.561069	0.328	0.343	1	SNX14	AS-BN_vs_AS-BP
0.0434373	0.592486	0.298	0.386	1	DEDD2	AS-BN_vs_AS-BP
0.0434665	0.829245	0.707	0.756	1	ZFP91	AS-BN_vs_AS-BP
0.0434799	0.273612	0.258	0.478	1	CNST	AS-BN_vs_AS-BP
0.043598	0.872328	0.384	0.357	1	RNASEH2B	AS-BN_vs_AS-BP
0.0438294	0.395825	0.429	0.652	1	PDPK1	AS-BN_vs_AS-BP
0.0439173	0.406428	0.53	0.574	1	SLC52A2	AS-BN_vs_AS-BP
0.0440081	1.05747	0.909	0.933	1	MXRA7	AS-BN_vs_AS-BP
0.0440799	0.265927	0.384	0.571	1	SLC35C1	AS-BN_vs_AS-BP
0.0441028	0.258753	0.707	0.812	1	CD276	AS-BN_vs_AS-BP
0.0441163	0.265694	0.566	0.67	1	ASXL1	AS-BN_vs_AS-BP
0.0441302	0.386103	0.677	0.722	1	EMC1	AS-BN_vs_AS-BP
0.0443932	0.498371	0.99	0.999	1	CALM1	AS-BN_vs_AS-BP
0.0444799	0.393273	0.813	0.92	1	STT3B	AS-BN_vs_AS-BP
0.0444807	0.571291	0.278	0.451	1	IPO4	AS-BN_vs_AS-BP
0.0447494	0.659038	0.965	0.994	1	MRPS21	AS-BN_vs_AS-BP
0.0449167	0.345197	0.288	0.521	1	FAM220A	AS-BN_vs_AS-BP
0.0452899	0.804712	1	1	1	RPS8	AS-BN_vs_AS-BP
0.0453307	0.268542	0.399	0.587	1	MCPH1	AS-BN_vs_AS-BP
0.0467583	0.265641	0.995	1	1	HMGB1	AS-BN_vs_AS-BP
0.0473862	0.941917	0.601	0.712	1	UBE2Q1	AS-BN_vs_AS-BP
0.0476462	0.403479	0.54	0.713	1	PITPNA	AS-BN_vs_AS-BP
0.0479712	0.653045	0.379	0.466	1	CACHD1	AS-BN_vs_AS-BP
0.0482251	0.299679	0.419	0.623	1	FAM20B	AS-BN_vs_AS-BP
0.0483574	0.537814	0.636	0.781	1	DZIP1	AS-BN_vs_AS-BP
0.0488566	0.933124	0.581	0.673	1	ERO1A	AS-BN_vs_AS-BP
0.0491375	0.328196	0.328	0.478	1	NCK2	AS-BN_vs_AS-BP
0.0492396	0.48572	0.697	0.824	1	CCDC88A	AS-BN_vs_AS-BP
0.0492922	0.334922	0.263	0.342	1	H6PD	AS-BN_vs_AS-BP
0.0496618	0.34913	0.354	0.481	1	SLC44A1	AS-BN_vs_AS-BP
0.0497192	0.988586	0.48	0.395	1	PLP2	AS-BN_vs_AS-BP
0.0501775	0.343258	0.848	0.938	1	BPTF	AS-BN_vs_AS-BP
0.0502111	0.734568	0.621	0.666	1	TMEM181	AS-BN_vs_AS-BP
0.0504757	0.355928	0.278	0.506	1	UBE2T	AS-BN_vs_AS-BP
0.0512577	1.15067	0.52	0.45	1	KIF26B	AS-BN_vs_AS-BP
0.0513062	1.12562	0.379	0.362	1	UBN2	AS-BN_vs_AS-BP
0.0515118	0.577741	0.793	0.861	1	MBNL1	AS-BN_vs_AS-BP
0.0515435	0.549933	0.47	0.54	1	TEX2	AS-BN_vs_AS-BP
0.0517744	0.521089	0.793	0.84	1	NF1	AS-BN_vs_AS-BP
0.0518319	0.345672	0.439	0.649	1	ZC3H4	AS-BN_vs_AS-BP
0.0524197	0.560475	0.394	0.501	1	B3GLCT	AS-BN_vs_AS-BP
0.0528116	0.964947	0.828	0.859	1	DVL3	AS-BN_vs_AS-BP
0.0528119	0.466438	0.283	0.41	1	ZNF48	AS-BN_vs_AS-BP
0.052928	0.410145	0.657	0.783	1	MYCBP2	AS-BN_vs_AS-BP
0.053385	0.338651	0.232	0.398	1	ING1	AS-BN_vs_AS-BP
0.0534102	0.547501	0.354	0.493	1	ZBTB21	AS-BN_vs_AS-BP
0.0535085	0.534723	0.404	0.388	1	PCNT	AS-BN_vs_AS-BP
0.0536479	0.698388	0.838	0.839	1	TRIM28	AS-BN_vs_AS-BP
0.0536699	0.567152	0.525	0.639	1	VEGFB	AS-BN_vs_AS-BP
0.053685	0.315397	0.384	0.617	1	PALS2	AS-BN_vs_AS-BP
0.0539633	0.849435	0.611	0.648	1	OSBP	AS-BN_vs_AS-BP
0.0541482	0.893237	0.419	0.33	1	KMT2D	AS-BN_vs_AS-BP
0.0544354	0.855731	0.601	0.574	1	PALM	AS-BN_vs_AS-BP
0.054849	0.620141	0.222	0.266	1	CDC6	AS-BN_vs_AS-BP
0.0548541	0.541935	0.803	0.891	1	PALM2AKAP2	AS-BN_vs_AS-BP
0.0552811	0.311324	0.348	0.609	1	ERRFI1	AS-BN_vs_AS-BP
0.0553872	0.61062	0.636	0.763	1	PHIP	AS-BN_vs_AS-BP
0.0557751	0.920558	0.439	0.192	1	COL3A1	AS-BN_vs_AS-BP
0.0560967	0.39524	0.576	0.743	1	SP3	AS-BN_vs_AS-BP
0.0566108	0.567581	0.247	0.337	1	RGP1	AS-BN_vs_AS-BP
0.0566114	0.434178	0.404	0.63	1	BIVM	AS-BN_vs_AS-BP
0.056778	0.63642	0.606	0.683	1	TMEM39A	AS-BN_vs_AS-BP
0.057239	0.744304	0.667	0.749	1	DIP2B	AS-BN_vs_AS-BP
0.0573149	0.373971	0.495	0.651	1	CASK	AS-BN_vs_AS-BP
0.0584621	0.28076	0.566	0.612	1	ANO4	AS-BN_vs_AS-BP
0.0587484	0.413979	0.273	0.393	1	CCNQ	AS-BN_vs_AS-BP
0.0588644	0.592588	0.828	0.926	1	UBE2R2	AS-BN_vs_AS-BP
0.0590314	0.270502	0.343	0.547	1	STX4	AS-BN_vs_AS-BP
0.0591758	0.612109	0.682	0.763	1	UBR5	AS-BN_vs_AS-BP
0.0592112	0.286078	0.707	0.861	1	TCERG1	AS-BN_vs_AS-BP
0.0592495	0.526599	0.394	0.275	1	PPP1R9B	AS-BN_vs_AS-BP
0.0592522	1.3459	0.525	0.38	1	TBC1D10B	AS-BN_vs_AS-BP
0.0594437	0.286285	0.182	0.331	1	FAM89A	AS-BN_vs_AS-BP
0.0594746	0.33131	0.717	0.84	1	RBM12	AS-BN_vs_AS-BP
0.059782	0.693099	0.717	0.772	1	ZMIZ1	AS-BN_vs_AS-BP
0.0598476	0.324541	0.914	0.979	1	PWP1	AS-BN_vs_AS-BP
0.0599344	0.374221	0.354	0.291	1	CIC	AS-BN_vs_AS-BP
0.0601227	0.613902	0.333	0.442	1	SH2B3	AS-BN_vs_AS-BP
0.0601461	0.738668	0.237	0.328	1	CSNK2A2	AS-BN_vs_AS-BP
0.0602835	0.409167	0.803	0.926	1	CDC42BPA	AS-BN_vs_AS-BP
0.0605866	0.260237	0.101	0.25	1	IRAK1BP1	AS-BN_vs_AS-BP
0.0606395	0.597174	0.288	0.192	1	TNRC18	AS-BN_vs_AS-BP
0.061003	0.387812	0.803	0.905	1	KIF1B	AS-BN_vs_AS-BP
0.0612014	0.507322	0.364	0.441	1	ZNF264	AS-BN_vs_AS-BP
0.0613175	0.764911	0.328	0.423	1	ROR1	AS-BN_vs_AS-BP
0.0616047	0.280971	0.313	0.291	1	SH3GLB2	AS-BN_vs_AS-BP
0.0616967	0.53248	0.268	0.383	1	SNX29	AS-BN_vs_AS-BP
0.0618286	0.374389	0.379	0.54	1	ZNF507	AS-BN_vs_AS-BP
0.0619315	0.310329	0.167	0.256	1	POLDIP3	AS-BN_vs_AS-BP
0.0620797	0.639048	0.444	0.516	1	NRIP1	AS-BN_vs_AS-BP
0.0622729	0.384485	0.455	0.589	1	KCTD5	AS-BN_vs_AS-BP
0.0622732	0.254578	0.753	0.882	1	RNF187	AS-BN_vs_AS-BP
0.0624466	0.382589	0.444	0.609	1	CPLANE1	AS-BN_vs_AS-BP
0.0630719	0.30198	0.939	0.957	1	ENC1	AS-BN_vs_AS-BP
0.063666	0.529014	0.258	0.365	1	AGAP1	AS-BN_vs_AS-BP
0.063813	0.943842	0.293	0.223	1	MOSMO	AS-BN_vs_AS-BP
0.06395	0.873762	0.768	0.851	1	WDR26	AS-BN_vs_AS-BP
0.0640035	0.277403	0.475	0.71	1	FAM199X	AS-BN_vs_AS-BP
0.0642481	0.340351	0.737	0.865	1	RAB3GAP2	AS-BN_vs_AS-BP
0.0643641	0.893988	0.217	0.314	1	BRI3BP	AS-BN_vs_AS-BP
0.0644989	0.27018	0.621	0.774	1	DIP2C	AS-BN_vs_AS-BP
0.0646885	0.559889	0.712	0.84	1	SNF8	AS-BN_vs_AS-BP
0.0647965	0.269474	0.237	0.333	1	PHF13	AS-BN_vs_AS-BP
0.0652398	0.324035	0.242	0.382	1	TMEM168	AS-BN_vs_AS-BP
0.0653694	0.470863	0.788	0.861	1	CRTAP	AS-BN_vs_AS-BP
0.0658468	0.623464	0.556	0.607	1	LPCAT2	AS-BN_vs_AS-BP
0.0660745	0.38698	0.899	0.954	1	ARL4C	AS-BN_vs_AS-BP
0.066629	0.721942	0.657	0.757	1	YTHDF1	AS-BN_vs_AS-BP
0.0666791	0.259283	0.424	0.639	1	BAG1	AS-BN_vs_AS-BP
0.066793	0.411541	0.444	0.614	1	KIF13A	AS-BN_vs_AS-BP
0.0668345	0.873113	0.712	0.658	1	FHL3	AS-BN_vs_AS-BP
0.0672965	0.675242	0.323	0.435	1	ILDR2	AS-BN_vs_AS-BP
0.0673113	0.828062	1	1	1	RPL35	AS-BN_vs_AS-BP
0.067343	0.352741	0.384	0.494	1	CSNK1G2	AS-BN_vs_AS-BP
0.0682109	0.436786	0.46	0.67	1	NUS1	AS-BN_vs_AS-BP
0.0683379	0.449987	0.273	0.235	1	SIRT7	AS-BN_vs_AS-BP
0.0684075	0.465986	0.576	0.719	1	MYO9A	AS-BN_vs_AS-BP
0.0684756	0.436015	1	1	1	HSP90AA1	AS-BN_vs_AS-BP
0.068554	0.343937	0.399	0.651	1	DNTTIP1	AS-BN_vs_AS-BP
0.0688067	0.288831	0.49	0.645	1	TGFBRAP1	AS-BN_vs_AS-BP
0.0689566	0.430161	0.409	0.54	1	ARSA	AS-BN_vs_AS-BP
0.0692427	0.276807	0.232	0.305	1	TMEM250	AS-BN_vs_AS-BP
0.0694214	0.925743	0.985	0.969	1	S100A11	AS-BN_vs_AS-BP
0.0695366	0.259867	0.343	0.308	1	SCAF1	AS-BN_vs_AS-BP
0.0696282	0.535471	0.384	0.42	1	B4GALNT1	AS-BN_vs_AS-BP
0.0703057	0.442044	0.732	0.893	1	NUCB2	AS-BN_vs_AS-BP
0.0703708	0.316618	0.162	0.265	1	RNF19B	AS-BN_vs_AS-BP
0.0710703	0.438958	0.323	0.293	1	TECPR1	AS-BN_vs_AS-BP
0.0712416	0.71086	0.874	0.836	1	TIMP1	AS-BN_vs_AS-BP
0.071927	0.342364	0.318	0.506	1	PRKRIP1	AS-BN_vs_AS-BP
0.0719345	0.425694	0.394	0.499	1	HS3ST3B1	AS-BN_vs_AS-BP
0.0720815	0.404646	0.162	0.308	1	PABIR2	AS-BN_vs_AS-BP
0.0721152	0.439196	0.288	0.404	1	ANTKMT	AS-BN_vs_AS-BP
0.0725951	0.469088	0.227	0.286	1	MORC2	AS-BN_vs_AS-BP
0.0728186	0.903534	0.449	0.357	1	PGP	AS-BN_vs_AS-BP
0.0729517	0.34322	0.525	0.615	1	ITPR2	AS-BN_vs_AS-BP
0.0729712	0.876508	0.995	0.999	1	RPL24	AS-BN_vs_AS-BP
0.0740878	0.328866	0.247	0.362	1	ABCA1	AS-BN_vs_AS-BP
0.0743886	0.607888	0.288	0.274	1	NAB2	AS-BN_vs_AS-BP
0.0745614	0.664096	0.606	0.605	1	ZNF358	AS-BN_vs_AS-BP
0.0745904	0.971117	0.434	0.51	1	DIPK1A	AS-BN_vs_AS-BP
0.0750342	0.38339	0.47	0.577	1	NHERF1	AS-BN_vs_AS-BP
0.0750678	0.39658	0.742	0.879	1	MAP4K5	AS-BN_vs_AS-BP
0.0752408	0.501766	0.258	0.47	1	ANAPC10	AS-BN_vs_AS-BP
0.0752812	0.262213	0.414	0.663	1	BBS7	AS-BN_vs_AS-BP
0.0753744	0.857488	0.293	0.253	1	PTPRE	AS-BN_vs_AS-BP
0.0755046	0.814774	0.253	0.186	1	TBC1D2B	AS-BN_vs_AS-BP
0.0759653	0.366204	0.288	0.509	1	CWC25	AS-BN_vs_AS-BP
0.0761762	0.581716	0.323	0.393	1	AK1	AS-BN_vs_AS-BP
0.0762878	0.254453	0.601	0.683	1	EP400	AS-BN_vs_AS-BP
0.0773759	0.46579	0.854	0.876	1	LDHA	AS-BN_vs_AS-BP
0.07783	0.42082	0.298	0.386	1	NT5DC1	AS-BN_vs_AS-BP
0.0780313	1.08496	0.747	0.76	1	ADAMTS12	AS-BN_vs_AS-BP
0.0786893	0.968739	0.697	0.725	1	UQCC5	AS-BN_vs_AS-BP
0.0790572	0.579699	0.323	0.322	1	TSPYL2	AS-BN_vs_AS-BP
0.0793995	0.374242	0.672	0.808	1	EXT2	AS-BN_vs_AS-BP
0.0796633	1.09463	0.51	0.484	1	KIAA1522	AS-BN_vs_AS-BP
0.0802874	0.257856	0.702	0.827	1	PRKACB	AS-BN_vs_AS-BP
0.080316	0.361796	0.5	0.632	1	NEK7	AS-BN_vs_AS-BP
0.0803821	0.696265	0.576	0.703	1	COPRS	AS-BN_vs_AS-BP
0.0814713	0.273983	0.232	0.299	1	DHX34	AS-BN_vs_AS-BP
0.0837761	1.43412	0.667	0.357	1	RUNX1	AS-BN_vs_AS-BP
0.0838246	0.425893	0.682	0.788	1	ATM	AS-BN_vs_AS-BP
0.0839558	0.81087	1	1	1	NAP1L1	AS-BN_vs_AS-BP
0.0843063	0.778063	0.894	0.842	1	RBP1	AS-BN_vs_AS-BP
0.0843702	0.432886	0.237	0.376	1	ARMH3	AS-BN_vs_AS-BP
0.0846749	0.500111	0.348	0.485	1	TBC1D9	AS-BN_vs_AS-BP
0.0857279	0.474956	0.985	0.999	1	CYCS	AS-BN_vs_AS-BP
0.0865278	0.398227	0.197	0.318	1	H2AJ	AS-BN_vs_AS-BP
0.0866388	0.609063	0.379	0.396	1	MAST2	AS-BN_vs_AS-BP
0.0868687	0.260052	0.207	0.287	1	ZFYVE19	AS-BN_vs_AS-BP
0.0878778	0.456097	0.404	0.618	1	GTF2E2	AS-BN_vs_AS-BP
0.0888863	0.386491	0.399	0.59	1	RBMX2	AS-BN_vs_AS-BP
0.0894034	0.422625	0.884	0.967	1	LAPTM4B	AS-BN_vs_AS-BP
0.0897359	0.953642	0.515	0.45	1	CARD10	AS-BN_vs_AS-BP
0.0898341	0.501119	0.778	0.849	1	KMT2C	AS-BN_vs_AS-BP
0.090286	0.39004	0.242	0.331	1	LRIG3	AS-BN_vs_AS-BP
0.0904907	0.450924	0.667	0.834	1	PNN	AS-BN_vs_AS-BP
0.0905734	0.350139	0.434	0.618	1	SELENOI	AS-BN_vs_AS-BP
0.0911032	0.298491	0.384	0.488	1	SNX8	AS-BN_vs_AS-BP
0.0918153	0.340957	0.823	0.922	1	MCL1	AS-BN_vs_AS-BP
0.092481	0.518613	0.359	0.364	1	MED12	AS-BN_vs_AS-BP
0.0930361	0.452841	0.399	0.432	1	LARGE1	AS-BN_vs_AS-BP
0.0936945	0.528507	0.323	0.463	1	HSPA1B	AS-BN_vs_AS-BP
0.0937451	0.484375	0.247	0.25	1	TIMELESS	AS-BN_vs_AS-BP
0.0948134	0.256635	0.919	0.97	1	TNPO1	AS-BN_vs_AS-BP
0.0949485	0.260489	0.157	0.29	1	ZC3H12C	AS-BN_vs_AS-BP
0.0950497	0.335954	0.697	0.855	1	BDP1	AS-BN_vs_AS-BP
0.0973139	0.669145	0.934	0.97	1	NDUFC1	AS-BN_vs_AS-BP
0.0975998	0.591952	0.616	0.737	1	MIB1	AS-BN_vs_AS-BP
0.0977771	0.465423	0.389	0.528	1	CDYL	AS-BN_vs_AS-BP
0.097869	0.609972	0.53	0.565	1	BAP1	AS-BN_vs_AS-BP
0.0978975	0.721039	0.52	0.561	1	SVIP	AS-BN_vs_AS-BP
0.098023	0.296434	0.535	0.652	1	CAMK1D	AS-BN_vs_AS-BP
0.0986334	0.642954	0.672	0.691	1	AFAP1	AS-BN_vs_AS-BP
0.0988679	0.511631	0.419	0.442	1	CISD3	AS-BN_vs_AS-BP
0.100521	0.378823	0.298	0.38	1	NR1D2	AS-BN_vs_AS-BP
0.100802	0.750271	0.556	0.512	1	ETS1	AS-BN_vs_AS-BP
0.101912	0.730392	0.414	0.513	1	GPCPD1	AS-BN_vs_AS-BP
0.102071	0.474367	0.697	0.817	1	CNPY2	AS-BN_vs_AS-BP
0.102534	0.267408	0.697	0.836	1	ARL14EP	AS-BN_vs_AS-BP
0.102621	0.594618	0.232	0.334	1	DNAJC25	AS-BN_vs_AS-BP
0.102979	0.369139	0.641	0.84	1	ARID4B	AS-BN_vs_AS-BP
0.104122	0.486693	0.404	0.469	1	PGAP6	AS-BN_vs_AS-BP
0.104135	1.1282	0.278	0.155	1	LCP1	AS-BN_vs_AS-BP
0.104196	0.674198	0.288	0.41	1	MCEE	AS-BN_vs_AS-BP
0.104363	0.621093	0.343	0.413	1	ITPK1	AS-BN_vs_AS-BP
0.104445	0.391173	0.758	0.843	1	ASCC3	AS-BN_vs_AS-BP
0.10482	0.426036	0.551	0.706	1	NR3C1	AS-BN_vs_AS-BP
0.105316	0.696229	0.51	0.592	1	RPGRIP1L	AS-BN_vs_AS-BP
0.105394	0.341524	0.263	0.324	1	NELFB	AS-BN_vs_AS-BP
0.10543	0.364668	0.944	0.972	1	TM9SF3	AS-BN_vs_AS-BP
0.105548	0.50345	0.409	0.549	1	ZCCHC9	AS-BN_vs_AS-BP
0.106353	0.388977	0.167	0.28	1	PHLPP2	AS-BN_vs_AS-BP
0.106435	0.392667	0.207	0.358	1	TPBG	AS-BN_vs_AS-BP
0.106889	0.571685	0.465	0.599	1	SAMD4A	AS-BN_vs_AS-BP
0.107151	0.327334	0.318	0.558	1	HAUS2	AS-BN_vs_AS-BP
0.107827	0.314857	0.859	0.926	1	KLF6	AS-BN_vs_AS-BP
0.108057	0.281893	0.641	0.754	1	KIF1C	AS-BN_vs_AS-BP
0.108148	0.534169	0.778	0.889	1	PRPF4B	AS-BN_vs_AS-BP
0.108658	0.630691	0.505	0.609	1	EHBP1	AS-BN_vs_AS-BP
0.109685	0.860988	0.636	0.694	1	RYK	AS-BN_vs_AS-BP
0.109983	0.453882	0.742	0.842	1	REST	AS-BN_vs_AS-BP
0.110505	0.332401	0.606	0.769	1	ARPC5L	AS-BN_vs_AS-BP
0.11051	0.764429	0.268	0.228	1	SCRIB	AS-BN_vs_AS-BP
0.111078	0.602034	0.687	0.821	1	ARIH1	AS-BN_vs_AS-BP
0.111094	0.608757	0.429	0.462	1	C2CD3	AS-BN_vs_AS-BP
0.11227	0.628516	0.621	0.731	1	CCDC186	AS-BN_vs_AS-BP
0.112542	0.426703	1	1	1	RPL6	AS-BN_vs_AS-BP
0.112885	0.273561	0.687	0.818	1	DIS3	AS-BN_vs_AS-BP
0.113588	0.389735	0.303	0.496	1	CCNYL1	AS-BN_vs_AS-BP
0.113716	0.637871	0.207	0.257	1	MIS18BP1	AS-BN_vs_AS-BP
0.113803	0.400769	0.495	0.669	1	DYRK1A	AS-BN_vs_AS-BP
0.114246	0.684066	0.778	0.854	1	NKTR	AS-BN_vs_AS-BP
0.114378	0.483731	0.354	0.559	1	DHRS4L2	AS-BN_vs_AS-BP
0.114543	0.659156	0.379	0.398	1	TMEM87B	AS-BN_vs_AS-BP
0.115145	0.624423	0.778	0.82	1	PTPRF	AS-BN_vs_AS-BP
0.115327	0.342229	0.606	0.735	1	CDKN1C	AS-BN_vs_AS-BP
0.115415	0.336204	0.682	0.791	1	EPM2AIP1	AS-BN_vs_AS-BP
0.116012	0.646088	0.99	0.996	1	GNB1	AS-BN_vs_AS-BP
0.11659	0.644219	0.273	0.373	1	BEND7	AS-BN_vs_AS-BP
0.119494	0.403239	0.283	0.448	1	USP12	AS-BN_vs_AS-BP
0.120645	0.782365	0.439	0.552	1	C15orf61	AS-BN_vs_AS-BP
0.121116	0.35473	0.687	0.842	1	XIAP	AS-BN_vs_AS-BP
0.121167	1.05536	0.924	0.864	1	CREB3L2	AS-BN_vs_AS-BP
0.12145	0.558364	0.348	0.519	1	ZNF800	AS-BN_vs_AS-BP
0.121724	0.508861	0.899	0.953	1	BMPR2	AS-BN_vs_AS-BP
0.122125	0.605112	0.985	0.994	1	ATP5IF1	AS-BN_vs_AS-BP
0.122502	0.833418	0.348	0.299	1	MOGS	AS-BN_vs_AS-BP
0.123088	0.387772	0.985	0.997	1	UBE2H	AS-BN_vs_AS-BP
0.123282	0.863838	1	1	1	MYL6	AS-BN_vs_AS-BP
0.124403	0.667003	0.99	0.999	1	COX6A1	AS-BN_vs_AS-BP
0.125023	0.573033	0.414	0.399	1	CASTOR2	AS-BN_vs_AS-BP
0.127208	0.653994	0.571	0.617	1	NOMO1	AS-BN_vs_AS-BP
0.127541	0.981781	0.399	0.296	1	RGS2	AS-BN_vs_AS-BP
0.127804	0.286213	0.348	0.605	1	SDCCAG8	AS-BN_vs_AS-BP
0.127816	0.363352	0.303	0.475	1	ANKRD28	AS-BN_vs_AS-BP
0.128662	0.535521	0.202	0.281	1	KLHL2	AS-BN_vs_AS-BP
[truncated: 44,741 more rows]

## Sheet: Table B
ONTOLOGY	ID	Description	GeneRatio	BgRatio	pvalue	p.adjust	qvalue	geneID	Count	Cluster
CC	GO:0005925	focal adhesion	25/100	420/16917	1.61383e-18	2.4019e-15	1.82648e-15	MYH9/CAV2/PLAU/PDLIM1/GJA1/CD44/CAV1/TES/TLN1/FBLIM1/ACTN1/PALLD/VCL/LIMA1/PDLIM7/PARVA/CAP1/LIMS1/CDC42EP1/ACTN4/TGFB1I1/FLNA/MSN/ZYX/CAPN2	25	Astrocyte
CC	GO:0030055	cell-substrate junction	25/100	429/16917	2.67771e-18	2.4019e-15	1.82648e-15	MYH9/CAV2/PLAU/PDLIM1/GJA1/CD44/CAV1/TES/TLN1/FBLIM1/ACTN1/PALLD/VCL/LIMA1/PDLIM7/PARVA/CAP1/LIMS1/CDC42EP1/ACTN4/TGFB1I1/FLNA/MSN/ZYX/CAPN2	25	Astrocyte
CC	GO:0032432	actin filament bundle	11/100	76/16917	7.30234e-13	4.3668e-10	3.32064e-10	MYH9/PDLIM1/PLS3/FBLIM1/ACTN1/PALLD/LIMA1/PDLIM2/PDLIM7/FLNA/ZYX	11	Astrocyte
BP	GO:0031589	cell-substrate adhesion	18/100	345/16917	1.60921e-12	7.21729e-10	5.48824e-10	SPOCK1/COL1A1/PLAU/THBS1/AXL/PDPN/CD44/TLN1/ACTN1/VCL/CCN2/SERPINE1/CCN1/PARVA/LIMS1/ACTN4/FLNA/ZYX	18	Astrocyte
CC	GO:0015629	actin cytoskeleton	20/100	479/16917	4.88909e-12	1.75421e-09	1.33395e-09	ARSJ/MYH9/PDLIM1/AXL/PLS3/FBLIM1/CALD1/ACTN1/PALLD/VCL/LIMA1/PDLIM2/PDLIM7/WDR1/PARVA/CAP1/ACTN4/FLNA/ZYX/CAPN2	20	Astrocyte
BP	GO:0001525	angiogenesis	20/100	495/16917	8.87702e-12	2.65423e-09	2.01835e-09	TGFBI/MMP2/MYH9/ADAM12/COL4A1/THBS1/RHOJ/EDN1/TNFRSF12A/CAV1/CALD1/CCN2/SERPINE1/TGFB2/CCN1/PARVA/FLNA/ELK3/LOXL2/ANXA3	20	Astrocyte
BP	GO:0042060	wound healing	18/100	415/16917	3.48357e-11	8.9279e-09	6.78904e-09	MYH9/COL1A1/PLAU/THBS1/AXL/PDPN/EDN1/TNFRSF12A/CD44/CAV1/TLN1/RHOC/VCL/SERPINE1/TGFB2/CCN1/FLNA/ELK3	18	Astrocyte
MF	GO:0003779	actin binding	18/100	425/16917	5.14852e-11	1.15456e-08	8.77958e-09	MYH9/PDLIM1/TAGLN/PLS3/TLN1/CALD1/ACTN1/PALLD/VCL/LIMA1/PDLIM2/PDLIM7/WDR1/PARVA/CAP1/ACTN4/FLNA/MSN	18	Astrocyte
CC	GO:0001725	stress fiber	9/100	68/16917	2.2557e-10	4.04672e-08	3.07725e-08	MYH9/PDLIM1/FBLIM1/ACTN1/PALLD/LIMA1/PDLIM2/PDLIM7/ZYX	9	Astrocyte
CC	GO:0097517	contractile actin filament bundle	9/100	68/16917	2.2557e-10	4.04672e-08	3.07725e-08	MYH9/PDLIM1/FBLIM1/ACTN1/PALLD/LIMA1/PDLIM2/PDLIM7/ZYX	9	Astrocyte
BP	GO:0070482	response to oxygen levels	15/100	306/16917	3.27754e-10	5.34536e-08	4.06477e-08	MMP2/COL1A1/PLAU/LMNA/THBS1/PDLIM1/PDPN/EDN1/CAV1/CHCHD2/CCN2/TGFB2/ACTN4/LOXL2/CAPN2	15	Astrocyte
CC	GO:0042641	actomyosin	9/100	75/16917	5.55674e-10	8.30732e-08	6.31713e-08	MYH9/PDLIM1/FBLIM1/ACTN1/PALLD/LIMA1/PDLIM2/PDLIM7/ZYX	9	Astrocyte
BP	GO:0071560	cellular response to transforming growth factor beta stimulus	13/100	250/16917	2.66881e-09	3.68296e-07	2.80063e-07	PMEPA1/COL1A1/CAV2/THBS1/CDKN2B/EDN1/CAV1/TGFB2/LIMS1/USP9Y/TGFB1I1/ANKRD1/ZYX	13	Astrocyte
BP	GO:0071559	response to transforming growth factor beta	13/100	256/16917	3.55576e-09	4.55645e-07	3.46486e-07	PMEPA1/COL1A1/CAV2/THBS1/CDKN2B/EDN1/CAV1/TGFB2/LIMS1/USP9Y/TGFB1I1/ANKRD1/ZYX	13	Astrocyte
BP	GO:0010810	regulation of cell-substrate adhesion	12/100	210/16917	3.94049e-09	4.71282e-07	3.58377e-07	SPOCK1/COL1A1/PLAU/THBS1/PDPN/TLN1/VCL/SERPINE1/CCN1/LIMS1/ACTN4/FLNA	12	Astrocyte
CC	GO:0030016	myofibril	12/100	226/16917	9.00745e-09	1.00996e-06	7.68004e-07	MMP2/PDLIM1/CALD1/ACTN1/PALLD/VCL/PDLIM2/PDLIM7/PARVA/ACTN4/FLNA/ANKRD1	12	Astrocyte
CC	GO:0030864	cortical actin cytoskeleton	8/100	72/16917	9.83366e-09	1.03774e-06	7.89128e-07	MYH9/CALD1/ACTN1/PDLIM2/WDR1/CAP1/ACTN4/CAPN2	8	Astrocyte
BP	GO:0036293	response to decreased oxygen levels	13/100	282/16917	1.13542e-08	1.13164e-06	8.6053e-07	MMP2/PLAU/LMNA/THBS1/PDLIM1/EDN1/CAV1/CHCHD2/CCN2/TGFB2/ACTN4/LOXL2/CAPN2	13	Astrocyte
CC	GO:0043292	contractile fiber	12/100	236/16917	1.46142e-08	1.37989e-06	1.04931e-06	MMP2/PDLIM1/CALD1/ACTN1/PALLD/VCL/PDLIM2/PDLIM7/PARVA/ACTN4/FLNA/ANKRD1	12	Astrocyte
BP	GO:0002009	morphogenesis of an epithelium	16/100	487/16917	2.53192e-08	2.27114e-06	1.72704e-06	MMP2/PRICKLE1/COL4A1/GJA1/PDPN/EDN1/CD44/RHOC/VCL/WDR1/TGFB2/CCN1/LUZP1/TGFB1I1/FLNA/MSN	16	Astrocyte
BP	GO:0001666	response to hypoxia	12/100	269/16917	6.20593e-08	5.1046e-06	3.88168e-06	MMP2/PLAU/LMNA/THBS1/PDLIM1/EDN1/CAV1/CHCHD2/TGFB2/ACTN4/LOXL2/CAPN2	12	Astrocyte
BP	GO:0007596	blood coagulation	11/100	217/16917	6.25982e-08	5.1046e-06	3.88168e-06	MYH9/PLAU/THBS1/AXL/PDPN/EDN1/CAV1/TLN1/VCL/SERPINE1/FLNA	11	Astrocyte
BP	GO:0050817	coagulation	11/100	219/16917	6.87403e-08	5.36174e-06	4.07723e-06	MYH9/PLAU/THBS1/AXL/PDPN/EDN1/CAV1/TLN1/VCL/SERPINE1/FLNA	11	Astrocyte
BP	GO:0007599	hemostasis	11/100	223/16917	8.26543e-08	6.17841e-06	4.69824e-06	MYH9/PLAU/THBS1/AXL/PDPN/EDN1/CAV1/TLN1/VCL/SERPINE1/FLNA	11	Astrocyte
CC	GO:0031674	I band	9/100	139/16917	1.32855e-07	9.53371e-06	7.24971e-06	PDLIM1/ACTN1/PALLD/PDLIM2/PDLIM7/PARVA/ACTN4/FLNA/ANKRD1	9	Astrocyte
CC	GO:0030863	cortical cytoskeleton	8/100	102/16917	1.55801e-07	1.07503e-05	8.17482e-06	MYH9/CALD1/ACTN1/PDLIM2/WDR1/CAP1/ACTN4/CAPN2	8	Astrocyte
CC	GO:0005911	cell-cell junction	15/100	488/16917	1.71605e-07	1.14022e-05	8.67057e-06	MYH9/FRMD6/PDLIM1/GJA1/TLN1/ACTN1/VCL/PDLIM2/PDLIM7/WDR1/LIMS1/CDC42EP1/FLNA/MSN/ZYX	15	Astrocyte
BP	GO:0030198	extracellular matrix organization	12/100	298/16917	1.88794e-07	1.20963e-05	9.19838e-06	TGFBI/MMP2/COL1A1/PRICKLE1/CAV2/COL4A1/PDPN/CAV1/CCN2/TGFB2/CCN1/LOXL2	12	Astrocyte
BP	GO:0043062	extracellular structure organization	12/100	299/16917	1.95736e-07	1.21087e-05	9.20778e-06	TGFBI/MMP2/COL1A1/PRICKLE1/CAV2/COL4A1/PDPN/CAV1/CCN2/TGFB2/CCN1/LOXL2	12	Astrocyte
BP	GO:0045229	external encapsulating structure organization	12/100	300/16917	2.02906e-07	1.21338e-05	9.22688e-06	TGFBI/MMP2/COL1A1/PRICKLE1/CAV2/COL4A1/PDPN/CAV1/CCN2/TGFB2/CCN1/LOXL2	12	Astrocyte
BP	GO:0043200	response to amino acid	8/100	111/16917	3.00309e-07	1.6917e-05	1.28642e-05	MMP2/COL1A1/COL4A1/NQO1/EDN1/CCN2/SH3BP4/CAPN2	8	Astrocyte
BP	GO:0051017	actin filament bundle assembly	9/100	153/16917	3.01753e-07	1.6917e-05	1.28642e-05	PDLIM1/PLS3/CALD1/ACTN1/RHOC/LIMA1/CCN2/FLNA/ZYX	9	Astrocyte
BP	GO:0061572	actin filament bundle organization	9/100	156/16917	3.55847e-07	1.93451e-05	1.47106e-05	PDLIM1/PLS3/CALD1/ACTN1/RHOC/LIMA1/CCN2/FLNA/ZYX	9	Astrocyte
CC	GO:0062023	collagen-containing extracellular matrix	13/100	383/16917	4.01809e-07	2.06203e-05	1.56803e-05	TGFBI/MMP2/COL1A1/COL4A1/LGALS1/THBS1/CCN2/SDC2/SERPINE1/TGFB2/CCN1/TGFB1I1/LOXL2	13	Astrocyte
CC	GO:0030017	sarcomere	10/100	207/16917	4.02291e-07	2.06203e-05	1.56803e-05	MMP2/PDLIM1/ACTN1/PALLD/PDLIM2/PDLIM7/PARVA/ACTN4/FLNA/ANKRD1	10	Astrocyte
BP	GO:0030048	actin filament-based movement	8/100	124/16917	7.03105e-07	3.41185e-05	2.59447e-05	MYH9/FRMD6/GJA1/PDPN/CAV1/PARVA/ACTN4/FLNA	8	Astrocyte
BP	GO:0007163	establishment or maintenance of cell polarity	10/100	220/16917	7.03671e-07	3.41185e-05	2.59447e-05	MYH9/PRICKLE1/LMNA/PDLIM1/RHOJ/GJA1/WDR1/PARVA/CAP1/MSN	10	Astrocyte
BP	GO:0043065	positive regulation of apoptotic process	14/100	473/16917	7.2269e-07	3.41186e-05	2.59448e-05	MMP2/LGALS1/THBS1/NQO1/TNFRSF12A/CAV1/GADD45B/PHLDA2/IGFBP3/TGFB2/CCN1/ANKRD1/BOK/CAPN2	14	Astrocyte
BP	GO:0001101	response to acid chemical	8/100	126/16917	7.94378e-07	3.56498e-05	2.71092e-05	MMP2/COL1A1/COL4A1/NQO1/EDN1/CCN2/SH3BP4/CAPN2	8	Astrocyte
BP	GO:0050878	regulation of body fluid levels	12/100	341/16917	7.94868e-07	3.56498e-05	2.71092e-05	MYH9/PRICKLE1/PLAU/THBS1/AXL/PDPN/EDN1/CAV1/TLN1/VCL/SERPINE1/FLNA	12	Astrocyte
CC	GO:0030018	Z disc	8/100	127/16917	8.43687e-07	3.69164e-05	2.80723e-05	PDLIM1/ACTN1/PALLD/PDLIM2/PDLIM7/PARVA/ACTN4/FLNA	8	Astrocyte
BP	GO:0007160	cell-matrix adhesion	10/100	229/16917	1.01412e-06	4.2633e-05	3.24194e-05	PLAU/THBS1/CD44/TLN1/ACTN1/VCL/CCN2/SERPINE1/LIMS1/ZYX	10	Astrocyte
BP	GO:0043068	positive regulation of programmed cell death	14/100	487/16917	1.02186e-06	4.2633e-05	3.24194e-05	MMP2/LGALS1/THBS1/NQO1/TNFRSF12A/CAV1/GADD45B/PHLDA2/IGFBP3/TGFB2/CCN1/ANKRD1/BOK/CAPN2	14	Astrocyte
BP	GO:0007178	transmembrane receptor protein serine/threonine kinase signaling pathway	12/100	352/16917	1.10983e-06	4.52509e-05	3.44101e-05	PMEPA1/CAV2/THBS1/CDKN2B/CAV1/RUNX2/FSTL1/TGFB2/CCN1/USP9Y/TGFB1I1/ZYX	12	Astrocyte
BP	GO:0008360	regulation of cell shape	8/100	133/16917	1.19796e-06	4.77587e-05	3.63171e-05	MYH9/RHOJ/PDPN/FBLIM1/WDR1/PARVA/CDC42EP1/MSN	8	Astrocyte
BP	GO:0030335	positive regulation of cell migration	14/100	496/16917	1.26868e-06	4.94784e-05	3.76249e-05	MMP2/COL1A1/PLAU/THBS1/RHOJ/PDPN/EDN1/CAV1/RHOC/SERPINE1/TGFB2/CCN1/ACTN4/ANXA3	14	Astrocyte
CC	GO:0005938	cell cortex	11/100	296/16917	1.39082e-06	5.26233e-05	4.00163e-05	MYH9/CAV1/CALD1/ACTN1/CCN2/PDLIM2/WDR1/CAP1/ACTN4/FLNA/CAPN2	11	Astrocyte
CC	GO:0005912	adherens junction	9/100	184/16917	1.42309e-06	5.26233e-05	4.00163e-05	MYH9/PDLIM1/TLN1/VCL/PDLIM2/PDLIM7/CDC42EP1/MSN/ZYX	9	Astrocyte
CC	GO:0005788	endoplasmic reticulum lumen	11/100	297/16917	1.43732e-06	5.26233e-05	4.00163e-05	ARSJ/COL1A1/COL4A1/LGALS1/THBS1/EDN1/PRSS23/IGFBP3/FSTL1/SDC2/CCN1	11	Astrocyte
BP	GO:0007179	transforming growth factor beta receptor signaling pathway	9/100	198/16917	2.60931e-06	9.36222e-05	7.11931e-05	PMEPA1/CAV2/THBS1/CDKN2B/CAV1/TGFB2/USP9Y/TGFB1I1/ZYX	9	Astrocyte
BP	GO:0045216	cell-cell junction organization	9/100	202/16917	3.07522e-06	0.000108175	8.22598e-05	GJA1/CAV1/TLN1/RHOC/VCL/WDR1/TGFB2/LIMS1/FLNA	9	Astrocyte
BP	GO:0001501	skeletal system development	13/100	485/16917	5.51374e-06	0.000190224	0.000144652	TGFBI/MMP2/COL1A1/GJA1/EDN1/CD44/PLS3/RUNX2/CCN2/TGFB2/CCN1/FLNA/LOXL2	13	Astrocyte
BP	GO:0055001	muscle cell development	8/100	176/16917	9.64847e-06	0.000322156	0.000244977	PRICKLE1/CAV2/LMNA/EDN1/ACTN1/WDR1/ACTN4/ANKRD1	8	Astrocyte
MF	GO:0019838	growth factor binding	7/100	126/16917	9.697e-06	0.000322156	0.000244977	COL1A1/S100A13/COL4A1/THBS1/IGFBP3/CCN2/CCN1	7	Astrocyte
BP	GO:0042692	muscle cell differentiation	11/100	366/16917	1.06002e-05	0.00034576	0.000262926	MYH9/ADAM12/PRICKLE1/CAV2/LMNA/EDN1/ACTN1/WDR1/ACTN4/ANKRD1/CAPN2	11	Astrocyte
BP	GO:0022604	regulation of cell morphogenesis	9/100	237/16917	1.12301e-05	0.000359766	0.000273576	MYH9/RHOJ/PDPN/CD44/FBLIM1/WDR1/PARVA/CDC42EP1/MSN	9	Astrocyte
BP	GO:0010718	positive regulation of epithelial to mesenchymal transition	5/100	51/16917	1.23562e-05	0.000388894	0.000295727	COL1A1/PDPN/TGFB2/TGFB1I1/LOXL2	5	Astrocyte
BP	GO:0051216	cartilage development	8/100	187/16917	1.50024e-05	0.000464041	0.00035287	TGFBI/COL1A1/EDN1/CD44/RUNX2/CCN2/CCN1/LOXL2	8	Astrocyte
BP	GO:0043903	regulation of biological process involved in symbiotic interaction	5/100	54/16917	1.64034e-05	0.000498774	0.000379283	LGALS1/CAV1/IFITM3/IFITM2/TRIM22	5	Astrocyte
BP	GO:0031032	actomyosin structure organization	8/100	192/16917	1.81583e-05	0.000542934	0.000412863	MYH9/PDLIM1/EDN1/RHOC/CCN2/WDR1/ANKRD1/ZYX	8	Astrocyte
BP	GO:0046718	viral entry into host cell	7/100	141/16917	2.01944e-05	0.000593913	0.000451629	CAV2/LGALS1/AXL/CAV1/IFITM3/IFITM2/TRIM22	7	Astrocyte
BP	GO:0002011	morphogenesis of an epithelial sheet	5/100	57/16917	2.14156e-05	0.000609833	0.000463735	PDPN/CD44/RHOC/CCN1/FLNA	5	Astrocyte
BP	GO:0010812	negative regulation of cell-substrate adhesion	5/100	57/16917	2.14156e-05	0.000609833	0.000463735	SPOCK1/COL1A1/THBS1/SERPINE1/ACTN4	5	Astrocyte
BP	GO:0070252	actin-mediated cell contraction	6/100	97/16917	2.34746e-05	0.000648612	0.000493224	FRMD6/GJA1/PDPN/CAV1/PARVA/FLNA	6	Astrocyte
MF	GO:0051015	actin filament binding	8/100	199/16917	2.35004e-05	0.000648612	0.000493224	MYH9/PLS3/TLN1/ACTN1/LIMA1/WDR1/ACTN4/FLNA	8	Astrocyte
BP	GO:0090092	regulation of transmembrane receptor protein serine/threonine kinase signaling pathway	9/100	261/16917	2.41561e-05	0.000656578	0.000499281	PMEPA1/CAV2/THBS1/CDKN2B/CAV1/FSTL1/TGFB2/CCN1/TGFB1I1	9	Astrocyte
MF	GO:0045296	cadherin binding	10/100	329/16917	2.48366e-05	0.000656578	0.000499281	MYH9/PDLIM1/TES/TLN1/CALD1/VCL/LIMA1/PARVA/CDC42EP1/FLNA	10	Astrocyte
BP	GO:0034446	substrate adhesion-dependent cell spreading	6/100	98/16917	2.4887e-05	0.000656578	0.000499281	AXL/PDPN/PARVA/LIMS1/ACTN4/FLNA	6	Astrocyte
MF	GO:0005178	integrin binding	7/100	148/16917	2.76107e-05	0.000707624	0.000538098	TGFBI/MYH9/THBS1/TLN1/ACTN1/CCN2/ACTN4	7	Astrocyte
BP	GO:0044409	entry into host	7/100	148/16917	2.76107e-05	0.000707624	0.000538098	CAV2/LGALS1/AXL/CAV1/IFITM3/IFITM2/TRIM22	7	Astrocyte
BP	GO:0001667	ameboidal-type cell migration	11/100	408/16917	2.89996e-05	0.00073275	0.000557205	MYH9/THBS1/PDLIM1/RHOJ/GJA1/EDN1/FSTL1/TGFB2/CAP1/LOXL2/ANXA3	11	Astrocyte
BP	GO:0051146	striated muscle cell differentiation	9/100	268/16917	2.97385e-05	0.000740985	0.000563467	MYH9/ADAM12/PRICKLE1/CAV2/LMNA/EDN1/WDR1/ANKRD1/CAPN2	9	Astrocyte
CC	GO:0005884	actin filament	6/100	102/16917	3.1237e-05	0.000757286	0.000575862	PDLIM1/PLS3/ACTN1/PALLD/PDLIM2/PDLIM7	6	Astrocyte
BP	GO:0150115	cell-substrate junction organization	6/100	102/16917	3.1237e-05	0.000757286	0.000575862	PRICKLE1/THBS1/TLN1/ACTN1/VCL/LIMS1	6	Astrocyte
BP	GO:0001837	epithelial to mesenchymal transition	7/100	153/16917	3.41767e-05	0.000817507	0.000621657	COL1A1/PDPN/EDN1/TGFB2/TGFB1I1/FLNA/LOXL2	7	Astrocyte
CC	GO:0031093	platelet alpha granule lumen	5/100	63/16917	3.49568e-05	0.000825165	0.00062748	THBS1/ACTN1/SERPINE1/TGFB2/ACTN4	5	Astrocyte
BP	GO:1903034	regulation of response to wounding	7/100	158/16917	4.19762e-05	0.000977991	0.000743693	PLAU/THBS1/EDN1/TNFRSF12A/CAV1/SERPINE1/FLNA	7	Astrocyte
BP	GO:0007229	integrin-mediated signaling pathway	6/100	111/16917	5.03273e-05	0.00115753	0.000880218	MYH9/TLN1/CCN2/LIMS1/FLNA/ZYX	6	Astrocyte
BP	GO:0090287	regulation of cellular response to growth factor stimulus	9/100	292/16917	5.79247e-05	0.00129237	0.000982755	PMEPA1/CAV2/THBS1/CDKN2B/CAV1/RUNX2/FSTL1/CCN1/TGFB1I1	9	Astrocyte
BP	GO:0030193	regulation of blood coagulation	5/100	70/16917	5.82578e-05	0.00129237	0.000982755	PLAU/THBS1/EDN1/CAV1/SERPINE1	5	Astrocyte
BP	GO:0032970	regulation of actin filament-based process	10/100	364/16917	5.83511e-05	0.00129237	0.000982755	MYH9/FRMD6/PDPN/EDN1/CAV1/RHOC/LIMA1/CCN2/WDR1/FLNA	10	Astrocyte
BP	GO:0042542	response to hydrogen peroxide	6/100	115/16917	6.13641e-05	0.00134253	0.0010209	MMP2/COL1A1/NQO1/AXL/EDN1/CAPN2	6	Astrocyte
BP	GO:0070527	platelet aggregation	5/100	71/16917	6.23796e-05	0.0013483	0.00102529	MYH9/PDPN/TLN1/VCL/FLNA	5	Astrocyte
BP	GO:0071230	cellular response to amino acid stimulus	5/100	72/16917	6.67229e-05	0.00139677	0.00106214	MMP2/COL1A1/COL4A1/SH3BP4/CAPN2	5	Astrocyte
BP	GO:1900046	regulation of hemostasis	5/100	72/16917	6.67229e-05	0.00139677	0.00106214	PLAU/THBS1/EDN1/CAV1/SERPINE1	5	Astrocyte
BP	GO:0001952	regulation of cell-matrix adhesion	6/100	117/16917	6.75645e-05	0.00139677	0.00106214	PLAU/THBS1/TLN1/VCL/SERPINE1/LIMS1	6	Astrocyte
BP	GO:0019058	viral life cycle	9/100	298/16917	6.77361e-05	0.00139677	0.00106214	CAV2/LGALS1/AXL/CAV1/IFITM3/IFITM2/APOBEC3C/TRIM22/ZBED1	9	Astrocyte
BP	GO:0044000	movement in host	7/100	172/16917	7.19021e-05	0.00146582	0.00111465	CAV2/LGALS1/AXL/CAV1/IFITM3/IFITM2/TRIM22	7	Astrocyte
BP	GO:0050818	regulation of coagulation	5/100	74/16917	7.61062e-05	0.0015341	0.00116657	PLAU/THBS1/EDN1/CAV1/SERPINE1	5	Astrocyte
CC	GO:0001726	ruffle	7/100	181/16917	9.90242e-05	0.00197388	0.001501	MYH9/PDPN/TLN1/ACTN1/PALLD/LIMA1/PDLIM7	7	Astrocyte
BP	GO:0071229	cellular response to acid chemical	5/100	80/16917	0.000110445	0.00214519	0.00163127	MMP2/COL1A1/COL4A1/SH3BP4/CAPN2	5	Astrocyte
BP	GO:0030168	platelet activation	6/100	128/16917	0.000111206	0.00214519	0.00163127	MYH9/AXL/PDPN/TLN1/VCL/FLNA	6	Astrocyte
BP	GO:0061041	regulation of wound healing	6/100	128/16917	0.000111206	0.00214519	0.00163127	PLAU/THBS1/EDN1/TNFRSF12A/CAV1/SERPINE1	6	Astrocyte
BP	GO:1903900	regulation of viral life cycle	6/100	129/16917	0.000116078	0.00220112	0.0016738	LGALS1/AXL/IFITM3/IFITM2/APOBEC3C/TRIM22	6	Astrocyte
BP	GO:0048545	response to steroid hormone	9/100	320/16917	0.000116559	0.00220112	0.0016738	PMEPA1/COL1A1/THBS1/EDN1/CAV1/CCN2/TGFB2/ANXA3/KDM5D	9	Astrocyte
BP	GO:0061448	connective tissue development	8/100	256/16917	0.000138185	0.00258233	0.00196368	TGFBI/COL1A1/EDN1/CD44/RUNX2/CCN2/CCN1/LOXL2	8	Astrocyte
BP	GO:0051701	biological process involved in interaction with host	7/100	192/16917	0.000142936	0.00261865	0.0019913	CAV2/LGALS1/AXL/CAV1/IFITM3/IFITM2/TRIM22	7	Astrocyte
BP	GO:0017015	regulation of transforming growth factor beta receptor signaling pathway	6/100	134/16917	0.000143048	0.00261865	0.0019913	PMEPA1/CAV2/THBS1/CDKN2B/CAV1/TGFB1I1	6	Astrocyte
BP	GO:0048041	focal adhesion assembly	5/100	85/16917	0.000147226	0.00266792	0.00202877	THBS1/TLN1/ACTN1/VCL/LIMS1	5	Astrocyte
BP	GO:1903844	regulation of cellular response to transforming growth factor beta stimulus	6/100	136/16917	0.000155132	0.00276361	0.00210153	PMEPA1/CAV2/THBS1/CDKN2B/CAV1/TGFB1I1	6	Astrocyte
CC	GO:0031091	platelet alpha granule	5/100	86/16917	0.000155588	0.00276361	0.00210153	THBS1/ACTN1/SERPINE1/TGFB2/ACTN4	5	Astrocyte
BP	GO:0033002	muscle cell proliferation	7/100	197/16917	0.00016754	0.00294674	0.00224078	MMP2/CAV2/THBS1/GJA1/EDN1/IGFBP3/TGFB2	7	Astrocyte
BP	GO:0007015	actin filament organization	10/100	422/16917	0.000196416	0.00342108	0.00260149	PDLIM1/PLS3/CALD1/ACTN1/RHOC/LIMA1/CCN2/WDR1/FLNA/ZYX	10	Astrocyte
BP	GO:0030195	negative regulation of blood coagulation	4/100	50/16917	0.000214863	0.00370638	0.00281844	PLAU/THBS1/EDN1/SERPINE1	4	Astrocyte
BP	GO:0007043	cell-cell junction assembly	6/100	145/16917	0.000219889	0.00375695	0.0028569	GJA1/CAV1/TLN1/RHOC/VCL/WDR1	6	Astrocyte
BP	GO:0010717	regulation of epithelial to mesenchymal transition	5/100	93/16917	0.000224738	0.00380359	0.00289236	COL1A1/PDPN/TGFB2/TGFB1I1/LOXL2	5	Astrocyte
BP	GO:0043542	endothelial cell migration	7/100	207/16917	0.000227047	0.00380676	0.00289477	MYH9/THBS1/RHOJ/EDN1/FSTL1/LOXL2/ANXA3	7	Astrocyte
BP	GO:1900047	negative regulation of hemostasis	4/100	51/16917	0.000232097	0.00385539	0.00293176	PLAU/THBS1/EDN1/SERPINE1	4	Astrocyte
BP	GO:0034109	homotypic cell-cell adhesion	5/100	94/16917	0.000236262	0.00388856	0.00295698	MYH9/PDPN/TLN1/VCL/FLNA	5	Astrocyte
BP	GO:0007044	cell-substrate junction assembly	5/100	95/16917	0.000248229	0.00404547	0.00307629	THBS1/TLN1/ACTN1/VCL/LIMS1	5	Astrocyte
MF	GO:0050840	extracellular matrix binding	4/100	52/16917	0.000250305	0.00404547	0.00307629	TGFBI/LGALS1/THBS1/CCN1	4	Astrocyte
BP	GO:0050819	negative regulation of coagulation	4/100	53/16917	0.000269517	0.00430784	0.00327581	PLAU/THBS1/EDN1/SERPINE1	4	Astrocyte
BP	GO:0044403	biological process involved in symbiotic interaction	8/100	283/16917	0.000273426	0.00430784	0.00327581	CAV2/LGALS1/AXL/CAV1/IFITM3/IFITM2/TRIM22/ZBED1	8	Astrocyte
BP	GO:0050792	regulation of viral process	6/100	151/16917	0.000273742	0.00430784	0.00327581	LGALS1/AXL/IFITM3/IFITM2/APOBEC3C/TRIM22	6	Astrocyte
BP	GO:0097191	extrinsic apoptotic signaling pathway	7/100	214/16917	0.000278052	0.00433761	0.00329845	LMNA/THBS1/TNFRSF12A/CAV1/SERPINE1/TGFB2/BOK	7	Astrocyte
BP	GO:0007568	aging	6/100	152/16917	0.000283645	0.00438672	0.00333579	MMP2/NQO1/CDKN2B/EDN1/CCN2/LOXL2	6	Astrocyte
BP	GO:0044344	cellular response to fibroblast growth factor stimulus	5/100	99/16917	0.00030077	0.0046118	0.00350695	COL1A1/THBS1/CD44/RUNX2/CCN2	5	Astrocyte
BP	GO:0060485	mesenchyme development	8/100	288/16917	0.000307588	0.00467638	0.00355605	COL1A1/PRICKLE1/PDPN/EDN1/TGFB2/TGFB1I1/FLNA/LOXL2	8	Astrocyte
BP	GO:0010631	epithelial cell migration	8/100	289/16917	0.000314822	0.00474614	0.0036091	MYH9/THBS1/RHOJ/EDN1/FSTL1/TGFB2/LOXL2/ANXA3	8	Astrocyte
BP	GO:0090132	epithelium migration	8/100	292/16917	0.000337364	0.00504359	0.00383529	MYH9/THBS1/RHOJ/EDN1/FSTL1/TGFB2/LOXL2/ANXA3	8	Astrocyte
BP	GO:0090130	tissue migration	8/100	297/16917	0.000377854	0.00560223	0.0042601	MYH9/THBS1/RHOJ/EDN1/FSTL1/TGFB2/LOXL2/ANXA3	8	Astrocyte
BP	GO:0071774	response to fibroblast growth factor	5/100	105/16917	0.000394884	0.00580674	0.00441561	COL1A1/THBS1/CD44/RUNX2/CCN2	5	Astrocyte
BP	GO:1900024	regulation of substrate adhesion-dependent cell spreading	4/100	59/16917	0.0004077	0.00594645	0.00452185	PDPN/LIMS1/ACTN4/FLNA	4	Astrocyte
MF	GO:0001786	phosphatidylserine binding	4/100	61/16917	0.000463274	0.00666288	0.00506665	THBS1/AXL/TLN1/SYTL2	4	Astrocyte
BP	GO:0048762	mesenchymal cell differentiation	7/100	233/16917	0.000464248	0.00666288	0.00506665	COL1A1/PDPN/EDN1/TGFB2/TGFB1I1/FLNA/LOXL2	7	Astrocyte
BP	GO:0051893	regulation of focal adhesion assembly	4/100	63/16917	0.000524047	0.00734485	0.00558524	THBS1/TLN1/VCL/LIMS1	4	Astrocyte
BP	GO:0070613	regulation of protein processing	4/100	63/16917	0.000524047	0.00734485	0.00558524	MYH9/PLAU/THBS1/SERPINE1	4	Astrocyte
BP	GO:0090109	regulation of cell-substrate junction assembly	4/100	63/16917	0.000524047	0.00734485	0.00558524	THBS1/TLN1/VCL/LIMS1	4	Astrocyte
BP	GO:0090100	positive regulation of transmembrane receptor protein serine/threonine kinase signaling pathway	5/100	112/16917	0.00053106	0.00738543	0.0056161	THBS1/CDKN2B/TGFB2/CCN1/TGFB1I1	5	Astrocyte
BP	GO:1903522	regulation of blood circulation	7/100	240/16917	0.000553797	0.00764239	0.0058115	MMP2/GJA1/EDN1/CAV1/CCN2/TGFB2/FLNA	7	Astrocyte
BP	GO:0016032	viral process	9/100	399/16917	0.000592166	0.00810951	0.00616671	CAV2/LGALS1/AXL/CAV1/IFITM3/IFITM2/APOBEC3C/TRIM22/ZBED1	9	Astrocyte
BP	GO:0003007	heart morphogenesis	7/100	244/16917	0.000610833	0.00830178	0.00631292	PRICKLE1/EDN1/TGFB2/CCN1/PARVA/FLNA/ANKRD1	7	Astrocyte
BP	GO:0061035	regulation of cartilage development	4/100	67/16917	0.000662268	0.00886648	0.00674233	RUNX2/CCN2/CCN1/LOXL2	4	Astrocyte
BP	GO:1903317	regulation of protein maturation	4/100	67/16917	0.000662268	0.00886648	0.00674233	MYH9/PLAU/THBS1/SERPINE1	4	Astrocyte
BP	GO:0043123	positive regulation of I-kappaB kinase/NF-kappaB signaling	6/100	179/16917	0.000676013	0.00898346	0.00683129	S100A13/LGALS1/GJA1/RHOC/FLNA/TRIM22	6	Astrocyte
BP	GO:0019221	cytokine-mediated signaling pathway	9/100	408/16917	0.000694335	0.00915909	0.00696484	AXL/EDN1/CD44/CAV1/IFITM3/IFITM2/LIMS1/ACTN4/IL13RA1	9	Astrocyte
BP	GO:0150116	regulation of cell-substrate junction organization	4/100	68/16917	0.000700494	0.00917289	0.00697534	THBS1/TLN1/VCL/LIMS1	4	Astrocyte
BP	GO:0000302	response to reactive oxygen species	6/100	183/16917	0.000758828	0.00986477	0.00750146	MMP2/COL1A1/NQO1/AXL/EDN1/CAPN2	6	Astrocyte
BP	GO:1903036	positive regulation of response to wounding	4/100	70/16917	0.00078159	0.0100876	0.00767089	PLAU/THBS1/SERPINE1/FLNA	4	Astrocyte
CC	GO:0031252	cell leading edge	9/100	418/16917	0.000824339	0.0105633	0.00803266	MYH9/PDPN/CD44/TLN1/ACTN1/PALLD/LIMA1/PDLIM7/PARVA	9	Astrocyte
BP	GO:0042476	odontogenesis	5/100	124/16917	0.000842977	0.0107255	0.00815601	COL1A1/EDN1/RUNX2/SERPINE1/TGFB2	5	Astrocyte
BP	GO:0050900	leukocyte migration	8/100	337/16917	0.000865952	0.0108276	0.00823362	MMP2/MYH9/THBS1/EDN1/SERPINE1/WDR1/TGFB2/MSN	8	Astrocyte
BP	GO:0014909	smooth muscle cell migration	4/100	72/16917	0.000869105	0.0108276	0.00823362	PLAU/IGFBP3/SERPINE1/PARVA	4	Astrocyte
BP	GO:0061045	negative regulation of wound healing	4/100	72/16917	0.000869105	0.0108276	0.00823362	PLAU/THBS1/EDN1/SERPINE1	4	Astrocyte
BP	GO:0034329	cell junction assembly	9/100	423/16917	0.000896424	0.0110285	0.0083864	THBS1/GJA1/CAV1/TLN1/ACTN1/RHOC/VCL/WDR1/LIMS1	9	Astrocyte
BP	GO:1901654	response to ketone	6/100	189/16917	0.000897526	0.0110285	0.0083864	THBS1/NQO1/EDN1/CAV1/TGFB2/MSN	6	Astrocyte
BP	GO:0003151	outflow tract morphogenesis	4/100	74/16917	0.000963312	0.0117563	0.00893986	PRICKLE1/EDN1/TGFB2/PARVA	4	Astrocyte
MF	GO:0046332	SMAD binding	4/100	75/16917	0.00101301	0.0122793	0.00933756	PMEPA1/USP9Y/TGFB1I1/ANKRD1	4	Astrocyte
BP	GO:0008016	regulation of heart contraction	6/100	194/16917	0.00102739	0.01237	0.00940655	GJA1/EDN1/CAV1/CCN2/TGFB2/FLNA	6	Astrocyte
MF	GO:0003713	transcription coactivator activity	7/100	268/16917	0.00105853	0.01266	0.00962705	PDLIM1/ACTN1/ACTN4/TGFB1I1/ANKRD1/TRIM22/ZBED1	7	Astrocyte
BP	GO:0050680	negative regulation of epithelial cell proliferation	5/100	132/16917	0.00111593	0.0132581	0.0100819	CAV2/THBS1/CDKN2B/CAV1/TGFB2	5	Astrocyte
BP	GO:2001233	regulation of apoptotic signaling pathway	8/100	352/16917	0.00114545	0.0135193	0.0102805	LMNA/THBS1/TNFRSF12A/CD44/CAV1/SERPINE1/IER3/BOK	8	Astrocyte
BP	GO:0007249	I-kappaB kinase/NF-kappaB signaling	7/100	272/16917	0.00115332	0.0135232	0.0102835	S100A13/LGALS1/GJA1/EDN1/RHOC/FLNA/TRIM22	7	Astrocyte
BP	GO:0097529	myeloid leukocyte migration	6/100	199/16917	0.00117125	0.0136443	0.0103755	MMP2/THBS1/EDN1/SERPINE1/WDR1/TGFB2	6	Astrocyte
BP	GO:0071356	cellular response to tumor necrosis factor	6/100	200/16917	0.00120179	0.0138362	0.0105215	COL1A1/THBS1/EDN1/LIMS1/ACTN4/ANKRD1	6	Astrocyte
BP	GO:0007162	negative regulation of cell adhesion	7/100	274/16917	0.00120315	0.0138362	0.0105215	TGFBI/SPOCK1/MMP2/COL1A1/THBS1/SERPINE1/ACTN4	7	Astrocyte
BP	GO:0048660	regulation of smooth muscle cell proliferation	5/100	136/16917	0.00127467	0.0145654	0.0110759	MMP2/THBS1/GJA1/EDN1/IGFBP3	5	Astrocyte
BP	GO:0052547	regulation of peptidase activity	8/100	359/16917	0.00129847	0.0147434	0.0112113	SPOCK1/THBS1/CD44/CAV1/CCN2/SERPINE1/CCN1/BOK	8	Astrocyte
BP	GO:0048661	positive regulation of smooth muscle cell proliferation	4/100	81/16917	0.00134969	0.0152285	0.0115802	MMP2/THBS1/GJA1/EDN1	4	Astrocyte
MF	GO:0072341	modified amino acid binding	4/100	82/16917	0.00141253	0.015838	0.0120437	THBS1/AXL/TLN1/SYTL2	4	Astrocyte
BP	GO:0009612	response to mechanical stimulus	6/100	207/16917	0.00143299	0.0159676	0.0121422	MMP2/COL1A1/THBS1/EDN1/ANKRD1/CAPN2	6	Astrocyte
BP	GO:0048659	smooth muscle cell proliferation	5/100	140/16917	0.00144953	0.0160523	0.0122066	MMP2/THBS1/GJA1/EDN1/IGFBP3	5	Astrocyte
BP	GO:0072593	reactive oxygen species metabolic process	6/100	210/16917	0.00154187	0.01697	0.0129045	THBS1/NQO1/EDN1/CCN2/CCN1/IER3	6	Astrocyte
BP	GO:0014812	muscle cell migration	4/100	85/16917	0.00161329	0.0176479	0.01342	PLAU/IGFBP3/SERPINE1/PARVA	4	Astrocyte
BP	GO:0010634	positive regulation of epithelial cell migration	5/100	145/16917	0.00169225	0.0183994	0.0139914	THBS1/RHOJ/EDN1/TGFB2/ANXA3	5	Astrocyte
BP	GO:2001234	negative regulation of apoptotic signaling pathway	6/100	215/16917	0.00173722	0.0187441	0.0142535	LMNA/THBS1/CD44/SERPINE1/IER3/BOK	6	Astrocyte
BP	GO:1903035	negative regulation of response to wounding	4/100	87/16917	0.00175766	0.0187441	0.0142535	PLAU/THBS1/EDN1/SERPINE1	4	Astrocyte
CC	GO:0034774	secretory granule lumen	7/100	293/16917	0.00176575	0.0187441	0.0142535	THBS1/ACTN1/VCL/SERPINE1/TGFB2/CAP1/ACTN4	7	Astrocyte
BP	GO:0052548	regulation of endopeptidase activity	7/100	293/16917	0.00176575	0.0187441	0.0142535	SPOCK1/THBS1/CD44/CCN2/SERPINE1/CCN1/BOK	7	Astrocyte
BP	GO:0048738	cardiac muscle tissue development	6/100	216/16917	0.00177845	0.0187679	0.0142717	PRICKLE1/LMNA/GJA1/EDN1/TGFB2/ANKRD1	6	Astrocyte
BP	GO:2001236	regulation of extrinsic apoptotic signaling pathway	5/100	148/16917	0.0018515	0.0194245	0.0147709	LMNA/THBS1/TNFRSF12A/CAV1/SERPINE1	5	Astrocyte
CC	GO:0060205	cytoplasmic vesicle lumen	7/100	296/16917	0.00187068	0.0195116	0.0148372	THBS1/ACTN1/VCL/SERPINE1/TGFB2/CAP1/ACTN4	7	Astrocyte
BP	GO:0001503	ossification	8/100	382/16917	0.00191943	0.0199044	0.0151359	MMP2/COL1A1/PRICKLE1/RUNX2/IGFBP3/CCN2/PDLIM7/CCN1	8	Astrocyte
CC	GO:0031983	vesicle lumen	7/100	298/16917	0.00194328	0.019999	0.0152078	THBS1/ACTN1/VCL/SERPINE1/TGFB2/CAP1/ACTN4	7	Astrocyte
BP	GO:0034612	response to tumor necrosis factor	6/100	220/16917	0.00195085	0.019999	0.0152078	COL1A1/THBS1/EDN1/LIMS1/ACTN4/ANKRD1	6	Astrocyte
BP	GO:0030512	negative regulation of transforming growth factor beta receptor signaling pathway	4/100	91/16917	0.00207286	0.021129	0.0160671	PMEPA1/CAV2/CAV1/TGFB1I1	4	Astrocyte
BP	GO:0060537	muscle tissue development	8/100	388/16917	0.00211487	0.0214354	0.0163001	PRICKLE1/CAV2/LMNA/GJA1/EDN1/CAV1/TGFB2/ANKRD1	8	Astrocyte
BP	GO:0030509	BMP signaling pathway	5/100	153/16917	0.00214093	0.0215777	0.0164083	RUNX2/FSTL1/TGFB2/CCN1/USP9Y	5	Astrocyte
BP	GO:0048771	tissue remodeling	5/100	155/16917	0.00226548	0.0227054	0.0172659	MMP2/AXL/GJA1/CAV1/FLNA	5	Astrocyte
CC	GO:0098862	cluster of actin-based cell projections	5/100	156/16917	0.0023297	0.0231273	0.0175867	MYH9/ACTN1/RHOC/LIMA1/FLNA	5	Astrocyte
BP	GO:0060047	heart contraction	6/100	228/16917	0.00233336	0.0231273	0.0175867	GJA1/EDN1/CAV1/CCN2/TGFB2/FLNA	6	Astrocyte
MF	GO:0005201	extracellular matrix structural constituent	5/100	159/16917	0.00253031	0.0248887	0.0189261	TGFBI/COL1A1/COL4A1/THBS1/CCN1	5	Astrocyte
BP	GO:0014706	striated muscle tissue development	6/100	232/16917	0.00254459	0.0248887	0.0189261	PRICKLE1/LMNA/GJA1/EDN1/TGFB2/ANKRD1	6	Astrocyte
BP	GO:0009410	response to xenobiotic stimulus	8/100	400/16917	0.00255269	0.0248887	0.0189261	MMP2/COL1A1/PRICKLE1/THBS1/NQO1/EDN1/TGFB2/ANKRD1	8	Astrocyte
BP	GO:0032963	collagen metabolic process	4/100	97/16917	0.00261583	0.0252301	0.0191857	MMP2/COL1A1/CCN2/TRAM2	4	Astrocyte
BP	GO:0060840	artery development	4/100	97/16917	0.00261583	0.0252301	0.0191857	PRICKLE1/EDN1/TGFB2/LUZP1	4	Astrocyte
BP	GO:0006979	response to oxidative stress	8/100	402/16917	0.00263211	0.0252514	0.0192019	MMP2/COL1A1/PDLIM1/NQO1/AXL/EDN1/CHCHD2/CAPN2	8	Astrocyte
BP	GO:0003012	muscle system process	8/100	403/16917	0.00267254	0.0255028	0.0193931	LMNA/GJA1/EDN1/CAV1/LMCD1/CALD1/CCN2/FLNA	8	Astrocyte
BP	GO:0071772	response to BMP	5/100	162/16917	0.0027432	0.0259016	0.0196963	RUNX2/FSTL1/TGFB2/CCN1/USP9Y	5	Astrocyte
BP	GO:0071773	cellular response to BMP stimulus	5/100	162/16917	0.0027432	0.0259016	0.0196963	RUNX2/FSTL1/TGFB2/CCN1/USP9Y	5	Astrocyte
BP	GO:0003015	heart process	6/100	239/16917	0.00294849	0.02755	0.0209498	GJA1/EDN1/CAV1/CCN2/TGFB2/FLNA	6	Astrocyte
BP	GO:0043122	regulation of I-kappaB kinase/NF-kappaB signaling	6/100	239/16917	0.00294849	0.02755	0.0209498	S100A13/LGALS1/GJA1/RHOC/FLNA/TRIM22	6	Astrocyte
BP	GO:0050673	epithelial cell proliferation	8/100	410/16917	0.00296936	0.0276012	0.0209888	CAV2/THBS1/CDKN2B/CAV1/RUNX2/IGFBP3/TGFB2/LOXL2	8	Astrocyte
BP	GO:0010595	positive regulation of endothelial cell migration	4/100	102/16917	0.00313712	0.0285685	0.0217243	THBS1/RHOJ/EDN1/ANXA3	4	Astrocyte
BP	GO:0030038	contractile actin filament bundle assembly	4/100	102/16917	0.00313712	0.0285685	0.0217243	PDLIM1/RHOC/CCN2/ZYX	4	Astrocyte
BP	GO:0043149	stress fiber assembly	4/100	102/16917	0.00313712	0.0285685	0.0217243	PDLIM1/RHOC/CCN2/ZYX	4	Astrocyte
BP	GO:0045446	endothelial cell differentiation	4/100	102/16917	0.00313712	0.0285685	0.0217243	PDPN/VCL/FSTL1/MSN	4	Astrocyte
BP	GO:0003279	cardiac septum development	4/100	103/16917	0.00324928	0.0292925	0.0222749	TGFB2/CCN1/PARVA/LUZP1	4	Astrocyte
CC	GO:0005903	brush border	4/100	103/16917	0.00324928	0.0292925	0.0222749	MYH9/ACTN1/LIMA1/FLNA	4	Astrocyte
MF	GO:0005200	structural constituent of cytoskeleton	4/100	104/16917	0.00336413	0.0301763	0.0229469	LMNA/TLN1/TUBB6/MSN	4	Astrocyte
BP	GO:0010823	negative regulation of mitochondrion organization	3/100	51/16917	0.00339795	0.0301779	0.0229481	LMNA/IER3/BOK	3	Astrocyte
MF	GO:0098632	cell-cell adhesion mediator activity	3/100	51/16917	0.00339795	0.0301779	0.0229481	PDLIM1/PALLD/CDC42EP1	3	Astrocyte
BP	GO:0010611	regulation of cardiac muscle hypertrophy	3/100	52/16917	0.00359067	0.0314227	0.0238948	LMNA/EDN1/LMCD1	3	Astrocyte
BP	GO:0045071	negative regulation of viral genome replication	3/100	52/16917	0.00359067	0.0314227	0.0238948	IFITM3/IFITM2/APOBEC3C	3	Astrocyte
BP	GO:0060324	face development	3/100	52/16917	0.00359067	0.0314227	0.0238948	MMP2/COL1A1/PRICKLE1	3	Astrocyte
BP	GO:0002062	chondrocyte differentiation	4/100	107/16917	0.00372525	0.0324422	0.02467	TGFBI/RUNX2/CCN2/LOXL2	4	Astrocyte
BP	GO:0060326	cell chemotaxis	6/100	251/16917	0.00375025	0.0325021	0.0247156	MMP2/THBS1/EDN1/SERPINE1/TGFB2/PARVA	6	Astrocyte
CC	GO:0032154	cleavage furrow	3/100	53/16917	0.00378994	0.0326882	0.0248571	MYH9/RHOC/LIMA1	3	Astrocyte
BP	GO:0000768	syncytium formation by plasma membrane fusion	3/100	55/16917	0.00420841	0.0357815	0.0272093	MYH9/ADAM12/CAPN2	3	Astrocyte
BP	GO:0014743	regulation of muscle hypertrophy	3/100	55/16917	0.00420841	0.0357815	0.0272093	LMNA/EDN1/LMCD1	3	Astrocyte
BP	GO:0140253	cell-cell fusion	3/100	55/16917	0.00420841	0.0357815	0.0272093	MYH9/ADAM12/CAPN2	3	Astrocyte
BP	GO:0014902	myotube differentiation	4/100	112/16917	0.00438409	0.0370993	0.0282114	MYH9/ADAM12/CAV2/CAPN2	4	Astrocyte
BP	GO:0032355	response to estradiol	4/100	113/16917	0.00452468	0.0380964	0.0289696	MMP2/COL1A1/NQO1/CCN2	4	Astrocyte
BP	GO:0043410	positive regulation of MAPK cascade	8/100	440/16917	0.00454439	0.0380964	0.0289696	CAV2/THBS1/EDN1/CD44/GADD45B/IGFBP3/CCN2/TGFB2	8	Astrocyte
BP	GO:0022612	gland morphogenesis	4/100	115/16917	0.00481491	0.0401765	0.0305514	MMP2/CAV1/TGFB2/MSN	4	Astrocyte
BP	GO:0006949	syncytium formation	3/100	59/16917	0.00512688	0.0418074	0.0317915	MYH9/ADAM12/CAPN2	3	Astrocyte
BP	GO:0019229	regulation of vasoconstriction	3/100	59/16917	0.00512688	0.0418074	0.0317915	MMP2/EDN1/CAV1	3	Astrocyte
BP	GO:0051480	regulation of cytosolic calcium ion concentration	3/100	59/16917	0.00512688	0.0418074	0.0317915	CAV2/CAV1/BOK	3	Astrocyte
BP	GO:0086065	cell communication involved in cardiac conduction	3/100	59/16917	0.00512688	0.0418074	0.0317915	GJA1/CAV1/FLNA	3	Astrocyte
BP	GO:0090303	positive regulation of wound healing	3/100	59/16917	0.00512688	0.0418074	0.0317915	PLAU/THBS1/SERPINE1	3	Astrocyte
BP	GO:0043281	regulation of cysteine-type endopeptidase activity involved in apoptotic process	5/100	188/16917	0.00516586	0.0419347	0.0318883	THBS1/CD44/CCN2/CCN1/BOK	5	Astrocyte
BP	GO:0045785	positive regulation of cell adhesion	8/100	450/16917	0.00519195	0.0419566	0.031905	LGALS1/PDPN/CD44/CAV1/TGFB2/CCN1/LIMS1/FLNA	8	Astrocyte
BP	GO:0045765	regulation of angiogenesis	6/100	269/16917	0.00524276	0.0421772	0.0320728	ADAM12/THBS1/RHOJ/SERPINE1/TGFB2/ANXA3	6	Astrocyte
BP	GO:0031638	zymogen activation	3/100	60/16917	0.00537383	0.0428473	0.0325824	PLAU/THBS1/SERPINE1	3	Astrocyte
BP	GO:1904705	regulation of vascular associated smooth muscle cell proliferation	3/100	60/16917	0.00537383	0.0428473	0.0325824	MMP2/GJA1/EDN1	3	Astrocyte
BP	GO:0034341	response to type II interferon	4/100	119/16917	0.00543242	0.0431228	0.0327919	EDN1/IFITM3/IFITM2/ZYX	4	Astrocyte
BP	GO:0003158	endothelium development	4/100	120/16917	0.00559467	0.0440887	0.0335263	PDPN/VCL/FSTL1/MSN	4	Astrocyte
BP	GO:1901342	regulation of vasculature development	6/100	273/16917	0.00562635	0.0440887	0.0335263	ADAM12/THBS1/RHOJ/SERPINE1/TGFB2/ANXA3	6	Astrocyte
BP	GO:0006360	transcription by RNA polymerase I	3/100	61/16917	0.00562782	0.0440887	0.0335263	CAVIN1/POLR2L/FLNA	3	Astrocyte
BP	GO:0002040	sprouting angiogenesis	4/100	121/16917	0.00576014	0.0447346	0.0340175	THBS1/RHOJ/PARVA/LOXL2	4	Astrocyte
BP	GO:0043467	regulation of generation of precursor metabolites and energy	4/100	121/16917	0.00576014	0.0447346	0.0340175	PHLDA2/CHCHD2/IER3/SLC2A6	4	Astrocyte
BP	GO:0030199	collagen fibril organization	3/100	62/16917	0.00588891	0.0451483	0.0343321	COL1A1/TGFB2/LOXL2	3	Astrocyte
MF	GO:0098631	cell adhesion mediator activity	3/100	62/16917	0.00588891	0.0451483	0.0343321	PDLIM1/PALLD/CDC42EP1	3	Astrocyte
BP	GO:1990874	vascular associated smooth muscle cell proliferation	3/100	62/16917	0.00588891	0.0451483	0.0343321	MMP2/GJA1/EDN1	3	Astrocyte
BP	GO:0019079	viral genome replication	4/100	122/16917	0.00592885	0.0452611	0.0344179	IFITM3/IFITM2/APOBEC3C/ZBED1	4	Astrocyte
MF	GO:0044325	transmembrane transporter binding	4/100	123/16917	0.00610082	0.0463766	0.0352661	CAV1/ACTN1/ACTN4/FLNA	4	Astrocyte
BP	GO:1901224	positive regulation of NIK/NF-kappaB signaling	3/100	63/16917	0.00615716	0.0466073	0.0354416	EDN1/LIMS1/ACTN4	3	Astrocyte
BP	GO:0030595	leukocyte chemotaxis	5/100	197/16917	0.00627709	0.0473156	0.0359801	MMP2/THBS1/EDN1/SERPINE1/TGFB2	5	Astrocyte
BP	GO:0002064	epithelial cell development	5/100	198/16917	0.00641014	0.0480484	0.0365374	FRMD6/PALLD/VCL/MSN/FOSL2	5	Astrocyte
BP	GO:0016049	cell growth	8/100	467/16917	0.00645274	0.0480484	0.0365374	SPOCK1/PRICKLE1/GJA1/EDN1/VCL/IGFBP3/TGFB2/SH3BP4	8	Astrocyte
BP	GO:0097530	granulocyte migration	4/100	125/16917	0.00645466	0.0480484	0.0365374	THBS1/EDN1/WDR1/TGFB2	4	Astrocyte
MF	GO:0005518	collagen binding	3/100	65/16917	0.00671529	0.0495771	0.0376999	TGFBI/THBS1/CD44	3	Astrocyte
BP	GO:0014910	regulation of smooth muscle cell migration	3/100	65/16917	0.00671529	0.0495771	0.0376999	PLAU/IGFBP3/SERPINE1	3	Astrocyte
BP	GO:0051346	negative regulation of hydrolase activity	6/100	285/16917	0.00690062	0.0507365	0.0385815	SPOCK1/THBS1/CD44/SERPINE1/TGFB2/SH3BP4	6	Astrocyte
BP	GO:0006809	nitric oxide biosynthetic process	3/100	66/16917	0.00700528	0.0511259	0.0388776	NQO1/EDN1/CAV1	3	Astrocyte
BP	GO:2001235	positive regulation of apoptotic signaling pathway	4/100	128/16917	0.00701058	0.0511259	0.0388776	THBS1/TNFRSF12A/CAV1/BOK	4	Astrocyte
BP	GO:0060048	cardiac muscle contraction	4/100	129/16917	0.00720269	0.0519876	0.0395329	GJA1/CAV1/CCN2/FLNA	4	Astrocyte
BP	GO:0008015	blood circulation	8/100	476/16917	0.00720814	0.0519876	0.0395329	MMP2/GJA1/EDN1/CAV1/CCN2/TGFB2/IER3/FLNA	8	Astrocyte
BP	GO:1901888	regulation of cell junction assembly	5/100	204/16917	0.00725038	0.0519876	0.0395329	THBS1/CAV1/TLN1/VCL/LIMS1	5	Astrocyte
BP	GO:0030239	myofibril assembly	3/100	67/16917	0.00730261	0.0519876	0.0395329	EDN1/WDR1/ANKRD1	3	Astrocyte
BP	GO:0043297	apical junction assembly	3/100	67/16917	0.00730261	0.0519876	0.0395329	RHOC/VCL/WDR1	3	Astrocyte
BP	GO:0045669	positive regulation of osteoblast differentiation	3/100	67/16917	0.00730261	0.0519876	0.0395329	RUNX2/PDLIM7/CCN1	3	Astrocyte
BP	GO:0055002	striated muscle cell development	3/100	68/16917	0.00760732	0.0539428	0.0410197	EDN1/WDR1/ANKRD1	3	Astrocyte
MF	GO:0003712	transcription coregulator activity	8/100	481/16917	0.00765578	0.0540727	0.0411185	PDLIM1/LMCD1/ACTN1/ACTN4/TGFB1I1/ANKRD1/TRIM22/ZBED1	8	Astrocyte
MF	GO:0017022	myosin binding	3/100	69/16917	0.00791946	0.0550679	0.0418752	AXL/CALD1/PDLIM2	3	Astrocyte
BP	GO:0051899	membrane depolarization	3/100	69/16917	0.00791946	0.0550679	0.0418752	EDN1/CAV1/BOK	3	Astrocyte
BP	GO:0060411	cardiac septum morphogenesis	3/100	69/16917	0.00791946	0.0550679	0.0418752	TGFB2/CCN1/PARVA	3	Astrocyte
BP	GO:0086003	cardiac muscle cell contraction	3/100	69/16917	0.00791946	0.0550679	0.0418752	GJA1/CAV1/FLNA	3	Astrocyte
BP	GO:0032496	response to lipopolysaccharide	6/100	295/16917	0.00811297	0.0561956	0.0427328	NQO1/AXL/EDN1/SERPINE1/ANKRD1/CAPN2	6	Astrocyte
BP	GO:0010951	negative regulation of endopeptidase activity	4/100	134/16917	0.00821553	0.0566318	0.0430645	SPOCK1/THBS1/CD44/SERPINE1	4	Astrocyte
CC	GO:0044291	cell-cell contact zone	3/100	70/16917	0.00823907	0.0566318	0.0430645	GJA1/ACTN1/VCL	3	Astrocyte
BP	GO:2000116	regulation of cysteine-type endopeptidase activity	5/100	211/16917	0.00832464	0.0570015	0.0433456	THBS1/CD44/CCN2/CCN1/BOK	5	Astrocyte
BP	GO:0003281	ventricular septum development	3/100	71/16917	0.00856618	0.0584324	0.0444337	TGFB2/CCN1/LUZP1	3	Astrocyte
BP	GO:0034614	cellular response to reactive oxygen species	4/100	136/16917	0.00864551	0.0587502	0.0446754	MMP2/NQO1/AXL/EDN1	4	Astrocyte
CC	GO:0032153	cell division site	3/100	72/16917	0.00890084	0.0595825	0.0453083	MYH9/RHOC/LIMA1	3	Astrocyte
BP	GO:0042698	ovulation cycle	3/100	72/16917	0.00890084	0.0595825	0.0453083	MMP2/AXL/TGFB2	3	Astrocyte
BP	GO:0046209	nitric oxide metabolic process	3/100	72/16917	0.00890084	0.0595825	0.0453083	NQO1/EDN1/CAV1	3	Astrocyte
BP	GO:0086001	cardiac muscle cell action potential	3/100	72/16917	0.00890084	0.0595825	0.0453083	GJA1/CAV1/FLNA	3	Astrocyte
BP	GO:0001649	osteoblast differentiation	5/100	215/16917	0.00898575	0.0599272	0.0455704	COL1A1/RUNX2/IGFBP3/PDLIM7/CCN1	5	Astrocyte
BP	GO:0060348	bone development	5/100	216/16917	0.00915653	0.0608401	0.0462646	COL1A1/GJA1/PLS3/RUNX2/FLNA	5	Astrocyte
BP	GO:2001057	reactive nitrogen species metabolic process	3/100	73/16917	0.00924307	0.0611884	0.0465295	NQO1/EDN1/CAV1	3	Astrocyte
BP	GO:0035051	cardiocyte differentiation	4/100	139/16917	0.00931771	0.0612307	0.0465616	PRICKLE1/LMNA/EDN1/TGFB2	4	Astrocyte
BP	GO:0090101	negative regulation of transmembrane receptor protein serine/threonine kinase signaling pathway	4/100	139/16917	0.00931771	0.0612307	0.0465616	PMEPA1/CAV2/CAV1/TGFB1I1	4	Astrocyte
BP	GO:0010632	regulation of epithelial cell migration	5/100	218/16917	0.00950482	0.0622323	0.0473233	THBS1/RHOJ/EDN1/TGFB2/ANXA3	5	Astrocyte
BP	GO:1904064	positive regulation of cation transmembrane transport	4/100	140/16917	0.00954912	0.062295	0.047371	EDN1/CAV1/ACTN4/FLNA	4	Astrocyte
BP	GO:0008543	fibroblast growth factor receptor signaling pathway	3/100	75/16917	0.00995042	0.0644442	0.0490053	THBS1/RUNX2/CCN2	3	Astrocyte
BP	GO:0055013	cardiac muscle cell development	3/100	75/16917	0.00995042	0.0644442	0.0490053	PRICKLE1/LMNA/EDN1	3	Astrocyte
BP	GO:0045936	negative regulation of phosphate metabolic process	7/100	405/16917	0.0101936	0.0656745	0.0499408	PMEPA1/CDKN2B/CAV1/GADD45B/IGFBP3/TGFB2/IER3	7	Astrocyte
BP	GO:0090257	regulation of muscle system process	5/100	222/16917	0.0102286	0.0656745	0.0499408	LMNA/EDN1/CAV1/LMCD1/CCN2	5	Astrocyte
BP	GO:0042310	vasoconstriction	3/100	76/16917	0.0103156	0.0656745	0.0499408	MMP2/EDN1/CAV1	3	Astrocyte
BP	GO:0043502	regulation of muscle adaptation	3/100	76/16917	0.0103156	0.0656745	0.0499408	LMNA/EDN1/LMCD1	3	Astrocyte
BP	GO:0010563	negative regulation of phosphorus metabolic process	7/100	406/16917	0.0103234	0.0656745	0.0499408	PMEPA1/CDKN2B/CAV1/GADD45B/IGFBP3/TGFB2/IER3	7	Astrocyte
BP	GO:0006909	phagocytosis	5/100	223/16917	0.0104153	0.065731	0.0499838	MYH9/THBS1/AXL/RAB34/ANXA3	5	Astrocyte
BP	GO:0030856	regulation of epithelial cell differentiation	4/100	144/16917	0.0105122	0.065731	0.0499838	CDKN2B/CAV1/VCL/SERPINE1	4	Astrocyte
BP	GO:0051592	response to calcium ion	4/100	144/16917	0.0105122	0.065731	0.0499838	S100A16/THBS1/EDN1/CAV1	4	Astrocyte
BP	GO:0002237	response to molecule of bacterial origin	6/100	312/16917	0.0105155	0.065731	0.0499838	NQO1/AXL/EDN1/SERPINE1/ANKRD1/CAPN2	6	Astrocyte
BP	GO:0051604	protein maturation	6/100	312/16917	0.0105155	0.065731	0.0499838	MYH9/PLAU/THBS1/SERPINE1/FLNA/CAPN2	6	Astrocyte
CC	GO:0045121	membrane raft	6/100	314/16917	0.0108281	0.0674499	0.0512909	CAV2/GJA1/PDPN/CAV1/CAVIN1/CAPN2	6	Astrocyte
CC	GO:0098857	membrane microdomain	6/100	315/16917	0.0109868	0.068202	0.0518628	CAV2/GJA1/PDPN/CAV1/CAVIN1/CAPN2	6	Astrocyte
BP	GO:0003300	cardiac muscle hypertrophy	3/100	78/16917	0.0110691	0.0682404	0.051892	LMNA/EDN1/LMCD1	3	Astrocyte
BP	GO:0048678	response to axon injury	3/100	78/16917	0.0110691	0.0682404	0.051892	MMP2/AXL/FLNA	3	Astrocyte
BP	GO:0071695	anatomical structure maturation	5/100	227/16917	0.0111856	0.0687224	0.0522585	MMP2/AXL/EDN1/RUNX2/TGFB2	5	Astrocyte
BP	GO:0007584	response to nutrient	4/100	147/16917	0.0112743	0.0690309	0.0524931	COL1A1/NQO1/CDKN2B/RUNX2	4	Astrocyte
BP	GO:0001935	endothelial cell proliferation	4/100	148/16917	0.011536	0.0701547	0.0533477	CAV2/THBS1/CAV1/LOXL2	4	Astrocyte
BP	GO:0016331	morphogenesis of embryonic epithelium	4/100	148/16917	0.011536	0.0701547	0.0533477	PRICKLE1/TGFB2/LUZP1/TGFB1I1	4	Astrocyte
CC	GO:0005901	caveola	3/100	80/16917	0.0118537	0.0713607	0.0542648	CAV2/CAV1/CAVIN1	3	Astrocyte
BP	GO:0007589	body fluid secretion	3/100	80/16917	0.0118537	0.0713607	0.0542648	PRICKLE1/EDN1/CAV1	3	Astrocyte
BP	GO:0014897	striated muscle hypertrophy	3/100	80/16917	0.0118537	0.0713607	0.0542648	LMNA/EDN1/LMCD1	3	Astrocyte
BP	GO:0006936	muscle contraction	6/100	321/16917	0.0119742	0.0718453	0.0546333	GJA1/EDN1/CAV1/CALD1/CCN2/FLNA	6	Astrocyte
BP	GO:0010469	regulation of signaling receptor activity	4/100	150/16917	0.0120712	0.0721857	0.0548922	PLAU/EDN1/PHLDA2/SERPINE1	4	Astrocyte
BP	GO:0032418	lysosome localization	3/100	81/16917	0.0122577	0.0725751	0.0551883	MYH9/S100A13/RAB34	3	Astrocyte
BP	GO:0055006	cardiac cell development	3/100	81/16917	0.0122577	0.0725751	0.0551883	PRICKLE1/LMNA/EDN1	3	Astrocyte
BP	GO:1990849	vacuolar localization	3/100	81/16917	0.0122577	0.0725751	0.0551883	MYH9/S100A13/RAB34	3	Astrocyte
BP	GO:0030010	establishment of cell polarity	4/100	151/16917	0.0123447	0.0728497	0.0553971	MYH9/PRICKLE1/GJA1/MSN	4	Astrocyte
BP	GO:0032956	regulation of actin cytoskeleton organization	6/100	324/16917	0.0124907	0.07323	0.0556863	EDN1/RHOC/LIMA1/CCN2/WDR1/FLNA	6	Astrocyte
BP	GO:0062197	cellular response to chemical stress	6/100	324/16917	0.0124907	0.07323	0.0556863	MMP2/NQO1/AXL/EDN1/CAV1/CHCHD2	6	Astrocyte
BP	GO:0014896	muscle hypertrophy	3/100	82/16917	0.0126695	0.073557	0.0559349	LMNA/EDN1/LMCD1	3	Astrocyte
BP	GO:0045069	regulation of viral genome replication	3/100	82/16917	0.0126695	0.073557	0.0559349	IFITM3/IFITM2/APOBEC3C	3	Astrocyte
BP	GO:0048525	negative regulation of viral process	3/100	82/16917	0.0126695	0.073557	0.0559349	IFITM3/IFITM2/APOBEC3C	3	Astrocyte
BP	GO:0016485	protein processing	5/100	236/16917	0.0130592	0.075505	0.0574162	MYH9/PLAU/THBS1/SERPINE1/CAPN2	5	Astrocyte
CC	GO:0005604	basement membrane	3/100	83/16917	0.0130892	0.075505	0.0574162	TGFBI/COL4A1/LOXL2	3	Astrocyte
BP	GO:0007009	plasma membrane organization	4/100	154/16917	0.0131888	0.0758355	0.0576676	MYH9/CAV2/CAV1/TGFB2	4	Astrocyte
BP	GO:0071453	cellular response to oxygen levels	4/100	155/16917	0.0134781	0.0769814	0.0585389	LMNA/EDN1/CAV1/CHCHD2	4	Astrocyte
BP	GO:0002690	positive regulation of leukocyte chemotaxis	3/100	84/16917	0.0135168	0.0769814	0.0585389	THBS1/EDN1/SERPINE1	3	Astrocyte
BP	GO:0033627	cell adhesion mediated by integrin	3/100	84/16917	0.0135168	0.0769814	0.0585389	PLAU/SERPINE1/TGFB2	3	Astrocyte
BP	GO:0031960	response to corticosteroid	4/100	156/16917	0.0137715	0.0776922	0.0590795	COL1A1/EDN1/CCN2/ANXA3	4	Astrocyte
BP	GO:0045766	positive regulation of angiogenesis	4/100	156/16917	0.0137715	0.0776922	0.0590795	ADAM12/THBS1/SERPINE1/ANXA3	4	Astrocyte
BP	GO:1904018	positive regulation of vasculature development	4/100	156/16917	0.0137715	0.0776922	0.0590795	ADAM12/THBS1/SERPINE1/ANXA3	4	Astrocyte
BP	GO:0070301	cellular response to hydrogen peroxide	3/100	85/16917	0.0139523	0.0782421	0.0594976	NQO1/AXL/EDN1	3	Astrocyte
BP	GO:0006898	receptor-mediated endocytosis	5/100	240/16917	0.0139562	0.0782421	0.0594976	CAV2/CAV1/PDLIM7/SERPINE1/CAP1	5	Astrocyte
BP	GO:0003205	cardiac chamber development	4/100	158/16917	0.0143704	0.0802047	0.06099	TGFB2/CCN1/PARVA/LUZP1	4	Astrocyte
BP	GO:1901216	positive regulation of neuron death	3/100	86/16917	0.0143957	0.0802047	0.06099	NQO1/TGFB2/CAPN2	3	Astrocyte
CC	GO:1905369	endopeptidase complex	3/100	87/16917	0.0148471	0.0824633	0.0627075	PRICKLE1/PLAU/CAPN2	3	Astrocyte
BP	GO:0010594	regulation of endothelial cell migration	4/100	161/16917	0.0152994	0.0842321	0.0640526	THBS1/RHOJ/EDN1/ANXA3	4	Astrocyte
BP	GO:0071347	cellular response to interleukin-1	3/100	88/16917	0.0153064	0.0842321	0.0640526	MMP2/EDN1/ANKRD1	3	Astrocyte
BP	GO:0097581	lamellipodium organization	3/100	88/16917	0.0153064	0.0842321	0.0640526	PDPN/CD44/VCL	3	Astrocyte
BP	GO:0045862	positive regulation of proteolysis	6/100	341/16917	0.0157176	0.0862303	0.065572	MYH9/PRICKLE1/CAV1/CCN2/CCN1/BOK	6	Astrocyte
BP	GO:0034767	positive regulation of monoatomic ion transmembrane transport	4/100	163/16917	0.0159393	0.086915	0.0660928	EDN1/CAV1/ACTN4/FLNA	4	Astrocyte
BP	GO:1902905	positive regulation of supramolecular fiber organization	4/100	163/16917	0.0159393	0.086915	0.0660928	EDN1/RHOC/CCN2/WDR1	4	Astrocyte
CC	GO:0005902	microvillus	3/100	90/16917	0.016249	0.0878031	0.0667681	PDPN/CD44/MSN	3	Astrocyte
BP	GO:0022406	membrane docking	3/100	90/16917	0.016249	0.0878031	0.0667681	CAV2/MSN/SYTL2	3	Astrocyte
BP	GO:1904035	regulation of epithelial cell apoptotic process	3/100	90/16917	0.016249	0.0878031	0.0667681	THBS1/SERPINE1/BOK	3	Astrocyte
BP	GO:0010038	response to metal ion	6/100	344/16917	0.0163418	0.0880396	0.0669479	S100A16/THBS1/NQO1/EDN1/CAV1/LOXL2	6	Astrocyte
BP	GO:1901222	regulation of NIK/NF-kappaB signaling	3/100	91/16917	0.0167322	0.0898731	0.0683422	EDN1/LIMS1/ACTN4	3	Astrocyte
BP	GO:0050678	regulation of epithelial cell proliferation	6/100	347/16917	0.0169831	0.090948	0.0691596	CAV2/THBS1/CDKN2B/CAV1/RUNX2/TGFB2	6	Astrocyte
BP	GO:0110053	regulation of actin filament organization	5/100	253/16917	0.0171566	0.0916041	0.0696585	RHOC/LIMA1/CCN2/WDR1/FLNA	5	Astrocyte
BP	GO:0006941	striated muscle contraction	4/100	168/16917	0.0176121	0.0937567	0.0712954	GJA1/CAV1/CCN2/FLNA	4	Astrocyte
BP	GO:0001738	morphogenesis of a polarized epithelium	3/100	93/16917	0.0177228	0.0937898	0.0713206	PRICKLE1/WDR1/MSN	3	Astrocyte
BP	GO:2001237	negative regulation of extrinsic apoptotic signaling pathway	3/100	93/16917	0.0177228	0.0937898	0.0713206	LMNA/THBS1/SERPINE1	3	Astrocyte
BP	GO:0006109	regulation of carbohydrate metabolic process	4/100	170/16917	0.0183107	0.0963676	0.0732807	PHLDA2/IGFBP3/IER3/SLC2A6	4	Astrocyte
BP	GO:0042176	regulation of protein catabolic process	6/100	353/16917	0.0183174	0.0963676	0.0732807	PRICKLE1/NQO1/CAV1/IER3/FLNA/MSN	6	Astrocyte
BP	GO:0042326	negative regulation of phosphorylation	6/100	354/16917	0.0185465	0.097288	0.0739807	PMEPA1/CDKN2B/CAV1/GADD45B/IGFBP3/IER3	6	Astrocyte
BP	GO:0061337	cardiac conduction	3/100	95/16917	0.0187456	0.0977602	0.0743398	GJA1/CAV1/FLNA	3	Astrocyte
BP	GO:0110020	regulation of actomyosin structure organization	3/100	95/16917	0.0187456	0.0977602	0.0743398	EDN1/RHOC/CCN2	3	Astrocyte
BP	GO:1902903	regulation of supramolecular fiber organization	6/100	356/16917	0.0190108	0.0986513	0.0750174	EDN1/RHOC/LIMA1/CCN2/WDR1/FLNA	6	Astrocyte
BP	GO:0031099	regeneration	4/100	172/16917	0.0190264	0.0986513	0.0750174	MMP2/AXL/FLNA/ANXA3	4	Astrocyte
BP	GO:0008630	intrinsic apoptotic signaling pathway in response to DNA damage	3/100	96/16917	0.019269	0.0990503	0.0753208	CD44/IER3/BOK	3	Astrocyte
BP	GO:0014020	primary neural tube formation	3/100	96/16917	0.019269	0.0990503	0.0753208	PRICKLE1/TGFB2/LUZP1	3	Astrocyte
BP	GO:0016525	negative regulation of angiogenesis	3/100	96/16917	0.019269	0.0990503	0.0753208	THBS1/SERPINE1/TGFB2	3	Astrocyte
BP	GO:0043588	skin development	5/100	261/16917	0.0193506	0.0991856	0.0754236	COL1A1/ELOVL1/PALLD/TGFB2/FOSL2	5	Astrocyte
MF	GO:0140297	DNA-binding transcription factor binding	7/100	461/16917	0.0194855	0.0995924	0.075733	RUNX2/CHCHD2/ACTN4/TGFB1I1/FLNA/ANKRD1/KDM5D	7	Astrocyte
BP	GO:2000181	negative regulation of blood vessel morphogenesis	3/100	97/16917	0.0198005	0.100915	0.0767387	THBS1/SERPINE1/TGFB2	3	Astrocyte
BP	GO:0050867	positive regulation of cell activation	6/100	360/16917	0.0199632	0.101456	0.0771501	LGALS1/THBS1/AXL/CAV1/CCN2/FLNA	6	Astrocyte
BP	GO:1901343	negative regulation of vasculature development	3/100	98/16917	0.02034	0.103079	0.0783843	THBS1/SERPINE1/TGFB2	3	Astrocyte
BP	GO:0034599	cellular response to oxidative stress	5/100	266/16917	0.0208116	0.104965	0.0798182	MMP2/NQO1/AXL/EDN1/CHCHD2	5	Astrocyte
BP	GO:0002444	myeloid leukocyte mediated immunity	3/100	99/16917	0.0208876	0.104965	0.0798182	S100A13/WDR1/ANXA3	3	Astrocyte
BP	GO:0043500	muscle adaptation	3/100	99/16917	0.0208876	0.104965	0.0798182	LMNA/EDN1/LMCD1	3	Astrocyte
BP	GO:1902074	response to salt	6/100	365/16917	0.0211989	0.106231	0.0807813	COL1A1/S100A16/THBS1/EDN1/CAV1/RUNX2	6	Astrocyte
BP	GO:0090066	regulation of anatomical structure size	7/100	470/16917	0.0214001	0.106859	0.0812588	MMP2/EDN1/CAV1/LIMA1/WDR1/MSN/PRR16	7	Astrocyte
BP	GO:0032231	regulation of actin filament bundle assembly	3/100	100/16917	0.0214433	0.106859	0.0812588	RHOC/CCN2/FLNA	3	Astrocyte
CC	GO:0031901	early endosome membrane	4/100	179/16917	0.0216671	0.107675	0.0818796	PMEPA1/CAV1/IFITM3/BOK	4	Astrocyte
BP	GO:1990266	neutrophil migration	3/100	101/16917	0.022007	0.109062	0.0829343	EDN1/WDR1/TGFB2	3	Astrocyte
MF	GO:0004175	endopeptidase activity	6/100	369/16917	0.0222241	0.109835	0.0835217	MMP2/ADAM12/PLAU/PRSS23/USP9Y/CAPN2	6	Astrocyte
BP	GO:0051495	positive regulation of cytoskeleton organization	4/100	181/16917	0.0224608	0.110673	0.0841593	EDN1/RHOC/CCN2/WDR1	4	Astrocyte
BP	GO:0008637	apoptotic mitochondrial changes	3/100	102/16917	0.0225789	0.110673	0.0841593	LMNA/IER3/BOK	3	Astrocyte
BP	GO:0071621	granulocyte chemotaxis	3/100	102/16917	0.0225789	0.110673	0.0841593	THBS1/EDN1/TGFB2	3	Astrocyte
MF	GO:0031267	small GTPase binding	5/100	272/16917	0.0226581	0.110759	0.0842245	CAV1/RAB34/SH3BP4/FLNA/SYTL2	5	Astrocyte
BP	GO:0140694	non-membrane-bounded organelle assembly	6/100	372/16917	0.0230148	0.112197	0.0853179	PRICKLE1/EDN1/WDR1/FLNA/MSN/ANKRD1	6	Astrocyte
BP	GO:0019882	antigen processing and presentation	3/100	103/16917	0.0231587	0.112533	0.0855732	THBS1/RAB34/KDM5D	3	Astrocyte
BP	GO:1901652	response to peptide	7/100	478/16917	0.0232091	0.112533	0.0855732	MMP2/COL1A1/CAV2/GJA1/EDN1/CAV1/CCN2	7	Astrocyte
BP	GO:0071222	cellular response to lipopolysaccharide	4/100	183/16917	0.0232721	0.112534	0.0855744	AXL/SERPINE1/ANKRD1/CAPN2	4	Astrocyte
BP	GO:0045861	negative regulation of proteolysis	5/100	275/16917	0.02362	0.113909	0.0866201	SPOCK1/PLAU/THBS1/CD44/SERPINE1	5	Astrocyte
BP	GO:0001841	neural tube formation	3/100	104/16917	0.0237467	0.114213	0.0868512	PRICKLE1/TGFB2/LUZP1	3	Astrocyte
BP	GO:0030336	negative regulation of cell migration	5/100	277/16917	0.0242758	0.116446	0.0885489	THBS1/GJA1/VCL/IGFBP3/SERPINE1	5	Astrocyte
BP	GO:0045445	myoblast differentiation	3/100	105/16917	0.0243427	0.116456	0.0885563	PRICKLE1/LGALS1/IGFBP3	3	Astrocyte
BP	GO:0010466	negative regulation of peptidase activity	4/100	186/16917	0.0245223	0.117002	0.0889721	SPOCK1/THBS1/CD44/SERPINE1	4	Astrocyte
BP	GO:0006874	intracellular calcium ion homeostasis	5/100	279/16917	0.0249432	0.118695	0.0902595	CAV2/EDN1/CAV1/FLNA/BOK	5	Astrocyte
BP	GO:0071675	regulation of mononuclear cell migration	3/100	108/16917	0.0261792	0.124247	0.0944813	THBS1/SERPINE1/MSN	3	Astrocyte
BP	GO:0044703	multi-organism reproductive process	4/100	190/16917	0.0262514	0.124261	0.0944918	MMP2/GJA1/EDN1/CAPN2	4	Astrocyte
BP	GO:0030326	embryonic limb morphogenesis	3/100	109/16917	0.0268075	0.126227	0.095987	PRICKLE1/RUNX2/TGFB2	3	Astrocyte
BP	GO:0035113	embryonic appendage morphogenesis	3/100	109/16917	0.0268075	0.126227	0.095987	PRICKLE1/RUNX2/TGFB2	3	Astrocyte
BP	GO:0051493	regulation of cytoskeleton organization	7/100	493/16917	0.0268821	0.126247	0.0960021	EDN1/RHOC/LIMA1/CCN2/WDR1/FLNA/CAPN2	7	Astrocyte
BP	GO:0071219	cellular response to molecule of bacterial origin	4/100	192/16917	0.0271428	0.127139	0.0966801	AXL/SERPINE1/ANKRD1/CAPN2	4	Astrocyte
BP	GO:0002688	regulation of leukocyte chemotaxis	3/100	110/16917	0.0274438	0.128214	0.0974977	THBS1/EDN1/SERPINE1	3	Astrocyte
BP	GO:0031532	actin cytoskeleton reorganization	3/100	111/16917	0.0280882	0.130207	0.0990134	MYH9/PARVA/FLNA	3	Astrocyte
CC	GO:0044853	plasma membrane raft	3/100	111/16917	0.0280882	0.130207	0.0990134	CAV2/CAV1/CAVIN1	3	Astrocyte
BP	GO:0055007	cardiac muscle cell differentiation	3/100	111/16917	0.0280882	0.130207	0.0990134	PRICKLE1/LMNA/EDN1	3	Astrocyte
BP	GO:0043534	blood vessel endothelial cell migration	3/100	112/16917	0.0287406	0.132888	0.101052	MYH9/THBS1/RHOJ	3	Astrocyte
BP	GO:2000146	negative regulation of cell motility	5/100	290/16917	0.0288256	0.132939	0.10109	THBS1/GJA1/VCL/IGFBP3/SERPINE1	5	Astrocyte
BP	GO:0044706	multi-multicellular organism process	4/100	196/16917	0.0289797	0.133307	0.10137	MMP2/GJA1/EDN1/CAPN2	4	Astrocyte
BP	GO:0070555	response to interleukin-1	3/100	113/16917	0.029401	0.134899	0.102581	MMP2/EDN1/ANKRD1	3	Astrocyte
BP	GO:0001558	regulation of cell growth	6/100	396/16917	0.0300309	0.137264	0.104379	SPOCK1/GJA1/EDN1/IGFBP3/TGFB2/SH3BP4	6	Astrocyte
BP	GO:0043280	positive regulation of cysteine-type endopeptidase activity involved in apoptotic process	3/100	114/16917	0.0300695	0.137264	0.104379	CCN2/CCN1/BOK	3	Astrocyte
BP	GO:0048705	skeletal system morphogenesis	4/100	199/16917	0.0304048	0.138442	0.105276	MMP2/COL1A1/RUNX2/CCN2	4	Astrocyte
BP	GO:0002685	regulation of leukocyte migration	4/100	201/16917	0.0313777	0.142031	0.108004	THBS1/EDN1/SERPINE1/MSN	4	Astrocyte
CC	GO:0030027	lamellipodium	4/100	201/16917	0.0313777	0.142031	0.108004	PDPN/CD44/PALLD/PARVA	4	Astrocyte
BP	GO:0010927	cellular component assembly involved in morphogenesis	3/100	116/16917	0.0314304	0.142031	0.108004	EDN1/WDR1/ANKRD1	3	Astrocyte
BP	GO:0021700	developmental maturation	5/100	298/16917	0.0318776	0.14369	0.109266	MMP2/AXL/EDN1/RUNX2/TGFB2	5	Astrocyte
BP	GO:0055074	calcium ion homeostasis	5/100	300/16917	0.0326711	0.146897	0.111705	CAV2/EDN1/CAV1/FLNA/BOK	5	Astrocyte
MF	GO:0005539	glycosaminoglycan binding	4/100	204/16917	0.0328711	0.147059	0.111828	THBS1/CD44/FSTL1/CCN2	4	Astrocyte
BP	GO:0045732	positive regulation of protein catabolic process	4/100	204/16917	0.0328711	0.147059	0.111828	PRICKLE1/CAV1/IER3/MSN	4	Astrocyte
BP	GO:0003206	cardiac chamber morphogenesis	3/100	119/16917	0.0335316	0.1489	0.113228	TGFB2/CCN1/PARVA	3	Astrocyte
BP	GO:0032874	positive regulation of stress-activated MAPK cascade	3/100	119/16917	0.0335316	0.1489	0.113228	GADD45B/CCN2/TGFB2	3	Astrocyte
BP	GO:0038061	NIK/NF-kappaB signaling	3/100	119/16917	0.0335316	0.1489	0.113228	EDN1/LIMS1/ACTN4	3	Astrocyte
BP	GO:0042391	regulation of membrane potential	6/100	407/16917	0.0336712	0.149151	0.113419	GJA1/EDN1/CAV1/WDR1/FLNA/BOK	6	Astrocyte
MF	GO:0051020	GTPase binding	5/100	303/16917	0.0338845	0.149334	0.113558	CAV1/RAB34/SH3BP4/FLNA/SYTL2	5	Astrocyte
BP	GO:0043523	regulation of neuron apoptotic process	4/100	206/16917	0.0338895	0.149334	0.113558	NQO1/AXL/TGFB2/BOK	4	Astrocyte
BP	GO:0003231	cardiac ventricle development	3/100	120/16917	0.034248	0.149334	0.113558	TGFB2/CCN1/LUZP1	3	Astrocyte
MF	GO:0019955	cytokine binding	3/100	120/16917	0.034248	0.149334	0.113558	THBS1/PDPN/IL13RA1	3	Astrocyte
BP	GO:0045667	regulation of osteoblast differentiation	3/100	120/16917	0.034248	0.149334	0.113558	RUNX2/PDLIM7/CCN1	3	Astrocyte
BP	GO:1904019	epithelial cell apoptotic process	3/100	120/16917	0.034248	0.149334	0.113558	THBS1/SERPINE1/BOK	3	Astrocyte
CC	GO:0030667	secretory granule membrane	5/100	304/16917	0.0342951	0.149334	0.113558	CAV2/PLAU/CD44/CAV1/GLIPR1	5	Astrocyte
BP	GO:0070304	positive regulation of stress-activated protein kinase signaling cascade	3/100	121/16917	0.0349722	0.151546	0.11524	GADD45B/CCN2/TGFB2	3	Astrocyte
CC	GO:1905368	peptidase complex	3/100	121/16917	0.0349722	0.151546	0.11524	PRICKLE1/PLAU/CAPN2	3	Astrocyte
MF	GO:0016655	oxidoreductase activity, acting on NAD(P)H, quinone or similar compound as acceptor	2/100	50/16917	0.0352637	0.15171	0.115365	NQO1/TP53I3	2	Astrocyte
BP	GO:0043525	positive regulation of neuron apoptotic process	2/100	50/16917	0.0352637	0.15171	0.115365	NQO1/TGFB2	2	Astrocyte
BP	GO:0045197	establishment or maintenance of epithelial cell apical/basal polarity	2/100	50/16917	0.0352637	0.15171	0.115365	WDR1/MSN	2	Astrocyte
BP	GO:0009743	response to carbohydrate	4/100	209/16917	0.0354515	0.152153	0.115702	THBS1/NQO1/RUNX2/CCN2	4	Astrocyte
BP	GO:0010811	positive regulation of cell-substrate adhesion	3/100	122/16917	0.0357044	0.152439	0.115919	CCN1/LIMS1/FLNA	3	Astrocyte
BP	GO:0048568	embryonic organ development	6/100	413/16917	0.0357729	0.152439	0.115919	PRICKLE1/EDN1/PHLDA2/RUNX2/TGFB2/CCN1	6	Astrocyte
BP	GO:0048732	gland development	6/100	413/16917	0.0357729	0.152439	0.115919	MMP2/CDKN2B/EDN1/CAV1/TGFB2/MSN	6	Astrocyte
BP	GO:1901214	regulation of neuron death	5/100	309/16917	0.0363947	0.153263	0.116545	NQO1/AXL/TGFB2/BOK/CAPN2	5	Astrocyte
BP	GO:2000027	regulation of animal organ morphogenesis	3/100	123/16917	0.0364445	0.153263	0.116545	PRICKLE1/EDN1/RUNX2	3	Astrocyte
BP	GO:0007566	embryo implantation	2/100	51/16917	0.0365643	0.153263	0.116545	MMP2/GJA1	2	Astrocyte
BP	GO:0030834	regulation of actin filament depolymerization	2/100	51/16917	0.0365643	0.153263	0.116545	LIMA1/WDR1	2	Astrocyte
BP	GO:0043536	positive regulation of blood vessel endothelial cell migration	2/100	51/16917	0.0365643	0.153263	0.116545	THBS1/RHOJ	2	Astrocyte
BP	GO:0045428	regulation of nitric oxide biosynthetic process	2/100	51/16917	0.0365643	0.153263	0.116545	EDN1/CAV1	2	Astrocyte
BP	GO:0051496	positive regulation of stress fiber assembly	2/100	51/16917	0.0365643	0.153263	0.116545	RHOC/CCN2	2	Astrocyte
BP	GO:0001838	embryonic epithelial tube formation	3/100	124/16917	0.0371925	0.155171	0.117996	PRICKLE1/TGFB2/LUZP1	3	Astrocyte
BP	GO:0032368	regulation of lipid transport	3/100	124/16917	0.0371925	0.155171	0.117996	THBS1/EDN1/CAV1	3	Astrocyte
BP	GO:0002042	cell migration involved in sprouting angiogenesis	2/100	52/16917	0.0378832	0.156596	0.11908	THBS1/RHOJ	2	Astrocyte
BP	GO:0031529	ruffle organization	2/100	52/16917	0.0378832	0.156596	0.11908	CAV1/LIMA1	2	Astrocyte
BP	GO:0043470	regulation of carbohydrate catabolic process	2/100	52/16917	0.0378832	0.156596	0.11908	IER3/SLC2A6	2	Astrocyte
BP	GO:1902743	regulation of lamellipodium organization	2/100	52/16917	0.0378832	0.156596	0.11908	PDPN/CD44	2	Astrocyte
BP	GO:0001933	negative regulation of protein phosphorylation	5/100	313/16917	0.0381306	0.156961	0.119358	PMEPA1/CDKN2B/CAV1/GADD45B/IGFBP3	5	Astrocyte
BP	GO:0043270	positive regulation of monoatomic ion transport	4/100	214/16917	0.0381466	0.156961	0.119358	EDN1/CAV1/ACTN4/FLNA	4	Astrocyte
BP	GO:0060562	epithelial tube morphogenesis	5/100	314/16917	0.0385724	0.15835	0.120414	PRICKLE1/COL4A1/EDN1/TGFB2/LUZP1	5	Astrocyte
BP	GO:0035088	establishment or maintenance of apical/basal cell polarity	2/100	53/16917	0.0392202	0.159549	0.121326	WDR1/MSN	2	Astrocyte
BP	GO:0048016	inositol phosphate-mediated signaling	2/100	53/16917	0.0392202	0.159549	0.121326	EDN1/LMCD1	2	Astrocyte
BP	GO:0061245	establishment or maintenance of bipolar cell polarity	2/100	53/16917	0.0392202	0.159549	0.121326	WDR1/MSN	2	Astrocyte
BP	GO:0072577	endothelial cell apoptotic process	2/100	53/16917	0.0392202	0.159549	0.121326	THBS1/SERPINE1	2	Astrocyte
CC	GO:0098858	actin-based cell projection	4/100	217/16917	0.0398189	0.161618	0.122899	PDPN/CD44/RHOC/MSN	4	Astrocyte
BP	GO:0050921	positive regulation of chemotaxis	3/100	128/16917	0.0402629	0.161759	0.123006	THBS1/EDN1/SERPINE1	3	Astrocyte
BP	GO:0071216	cellular response to biotic stimulus	4/100	218/16917	0.0403855	0.161759	0.123006	AXL/SERPINE1/ANKRD1/CAPN2	4	Astrocyte
BP	GO:0001836	release of cytochrome c from mitochondria	2/100	54/16917	0.040575	0.161759	0.123006	LMNA/BOK	2	Astrocyte
BP	GO:0002931	response to ischemia	2/100	54/16917	0.040575	0.161759	0.123006	NQO1/CAV1	2	Astrocyte
BP	GO:0010761	fibroblast migration	2/100	54/16917	0.040575	0.161759	0.123006	THBS1/PDLIM1	2	Astrocyte
BP	GO:0031102	neuron projection regeneration	2/100	54/16917	0.040575	0.161759	0.123006	MMP2/FLNA	2	Astrocyte
BP	GO:0051293	establishment of spindle localization	2/100	54/16917	0.040575	0.161759	0.123006	MYH9/GJA1	2	Astrocyte
BP	GO:0080164	regulation of nitric oxide metabolic process	2/100	54/16917	0.040575	0.161759	0.123006	EDN1/CAV1	2	Astrocyte
BP	GO:0034764	positive regulation of transmembrane transport	4/100	219/16917	0.0409567	0.162919	0.123888	EDN1/CAV1/ACTN4/FLNA	4	Astrocyte
BP	GO:0008544	epidermis development	5/100	320/16917	0.0412892	0.163878	0.124617	ELOVL1/PALLD/CCN2/TGFB2/FOSL2	5	Astrocyte
MF	GO:0005507	copper ion binding	2/100	55/16917	0.0419474	0.165392	0.125769	S100A13/LOXL2	2	Astrocyte
MF	GO:0030374	nuclear receptor coactivator activity	2/100	55/16917	0.0419474	0.165392	0.125769	ACTN1/ACTN4	2	Astrocyte
BP	GO:1905517	macrophage migration	2/100	55/16917	0.0419474	0.165392	0.125769	MMP2/THBS1	2	Astrocyte
BP	GO:0035296	regulation of tube diameter	3/100	131/16917	0.0426477	0.167052	0.127032	MMP2/EDN1/CAV1	3	Astrocyte
BP	GO:0097746	blood vessel diameter maintenance	3/100	131/16917	0.0426477	0.167052	0.127032	MMP2/EDN1/CAV1	3	Astrocyte
BP	GO:2001056	positive regulation of cysteine-type endopeptidase activity	3/100	131/16917	0.0426477	0.167052	0.127032	CCN2/CCN1/BOK	3	Astrocyte
BP	GO:0030042	actin filament depolymerization	2/100	56/16917	0.043337	0.167664	0.127497	LIMA1/WDR1	2	Astrocyte
BP	GO:0030858	positive regulation of epithelial cell differentiation	2/100	56/16917	0.043337	0.167664	0.127497	CDKN2B/SERPINE1	2	Astrocyte
BP	GO:0060350	endochondral bone morphogenesis	2/100	56/16917	0.043337	0.167664	0.127497	COL1A1/RUNX2	2	Astrocyte
BP	GO:0098900	regulation of action potential	2/100	56/16917	0.043337	0.167664	0.127497	CAV1/FLNA	2	Astrocyte
BP	GO:0001936	regulation of endothelial cell proliferation	3/100	132/16917	0.0434581	0.167664	0.127497	CAV2/THBS1/CAV1	3	Astrocyte
BP	GO:0002687	positive regulation of leukocyte migration	3/100	132/16917	0.0434581	0.167664	0.127497	THBS1/EDN1/SERPINE1	3	Astrocyte
BP	GO:0035150	regulation of tube size	3/100	132/16917	0.0434581	0.167664	0.127497	MMP2/EDN1/CAV1	3	Astrocyte
BP	GO:0040013	negative regulation of locomotion	5/100	325/16917	0.04364	0.167929	0.127698	THBS1/GJA1/VCL/IGFBP3/SERPINE1	5	Astrocyte
BP	GO:0035107	appendage morphogenesis	3/100	133/16917	0.0442762	0.167929	0.127698	PRICKLE1/RUNX2/TGFB2	3	Astrocyte
BP	GO:0035108	limb morphogenesis	3/100	133/16917	0.0442762	0.167929	0.127698	PRICKLE1/RUNX2/TGFB2	3	Astrocyte
BP	GO:0071456	cellular response to hypoxia	3/100	133/16917	0.0442762	0.167929	0.127698	LMNA/EDN1/CHCHD2	3	Astrocyte
BP	GO:0001961	positive regulation of cytokine-mediated signaling pathway	2/100	57/16917	0.0447436	0.167929	0.127698	AXL/EDN1	2	Astrocyte
BP	GO:0022617	extracellular matrix disassembly	2/100	57/16917	0.0447436	0.167929	0.127698	MMP2/PDPN	2	Astrocyte
BP	GO:0046902	regulation of mitochondrial membrane permeability	2/100	57/16917	0.0447436	0.167929	0.127698	IER3/BOK	2	Astrocyte
BP	GO:0055008	cardiac muscle tissue morphogenesis	2/100	57/16917	0.0447436	0.167929	0.127698	TGFB2/ANKRD1	2	Astrocyte
BP	GO:0060337	type I interferon-mediated signaling pathway	2/100	57/16917	0.0447436	0.167929	0.127698	IFITM3/IFITM2	2	Astrocyte
BP	GO:0071709	membrane assembly	2/100	57/16917	0.0447436	0.167929	0.127698	CAV2/CAV1	2	Astrocyte
CC	GO:0098636	protein complex involved in cell adhesion	2/100	57/16917	0.0447436	0.167929	0.127698	PLAU/LGALS1	2	Astrocyte
BP	GO:0099024	plasma membrane invagination	2/100	57/16917	0.0447436	0.167929	0.127698	MYH9/THBS1	2	Astrocyte
BP	GO:2001244	positive regulation of intrinsic apoptotic signaling pathway	2/100	57/16917	0.0447436	0.167929	0.127698	CAV1/BOK	2	Astrocyte
BP	GO:0007517	muscle organ development	5/100	328/16917	0.0450887	0.168569	0.128185	CAV2/TAGLN/CAV1/TGFB2/ANKRD1	5	Astrocyte
CC	GO:0042383	sarcolemma	3/100	134/16917	0.0451021	0.168569	0.128185	CAV2/CAV1/VCL	3	Astrocyte
BP	GO:0001508	action potential	3/100	135/16917	0.0459355	0.170069	0.129326	GJA1/CAV1/FLNA	3	Astrocyte
MF	GO:0016922	nuclear receptor binding	3/100	135/16917	0.0459355	0.170069	0.129326	ACTN4/TGFB1I1/KDM5D	3	Astrocyte
BP	GO:0003179	heart valve morphogenesis	2/100	58/16917	0.0461671	0.170069	0.129326	TGFB2/CCN1	2	Astrocyte
BP	GO:0006940	regulation of smooth muscle contraction	2/100	58/16917	0.0461671	0.170069	0.129326	EDN1/CAV1	2	Astrocyte
BP	GO:0034113	heterotypic cell-cell adhesion	2/100	58/16917	0.0461671	0.170069	0.129326	CD44/PARVA	2	Astrocyte
BP	GO:0035904	aorta development	2/100	58/16917	0.0461671	0.170069	0.129326	PRICKLE1/TGFB2	2	Astrocyte
BP	GO:0071357	cellular response to type I interferon	2/100	58/16917	0.0461671	0.170069	0.129326	IFITM3/IFITM2	2	Astrocyte
CC	GO:0045335	phagocytic vesicle	3/100	136/16917	0.0467767	0.17161	0.130497	RAB34/ANXA3/ZYX	3	Astrocyte
BP	GO:0072175	epithelial tube formation	3/100	136/16917	0.0467767	0.17161	0.130497	PRICKLE1/TGFB2/LUZP1	3	Astrocyte
BP	GO:0048863	stem cell differentiation	4/100	229/16917	0.0469221	0.171792	0.130636	PRICKLE1/EDN1/RUNX2/TGFB2	4	Astrocyte
BP	GO:0030219	megakaryocyte differentiation	2/100	59/16917	0.0476071	0.17324	0.131736	CDKN2B/FLNA	2	Astrocyte
BP	GO:0051653	spindle localization	2/100	59/16917	0.0476071	0.17324	0.131736	MYH9/GJA1	2	Astrocyte
BP	GO:0070542	response to fatty acid	2/100	59/16917	0.0476071	0.17324	0.131736	EDN1/CCN2	2	Astrocyte
BP	GO:0001885	endothelial cell development	2/100	60/16917	0.0490634	0.176746	0.134403	VCL/MSN	2	Astrocyte
BP	GO:0032233	positive regulation of actin filament bundle assembly	2/100	60/16917	0.0490634	0.176746	0.134403	RHOC/CCN2	2	Astrocyte
BP	GO:0060193	positive regulation of lipase activity	2/100	60/16917	0.0490634	0.176746	0.134403	RHOC/CCN1	2	Astrocyte
BP	GO:0060393	regulation of pathway-restricted SMAD protein phosphorylation	2/100	60/16917	0.0490634	0.176746	0.134403	PMEPA1/TGFB2	2	Astrocyte
BP	GO:0070265	necrotic cell death	2/100	60/16917	0.0490634	0.176746	0.134403	CAV1/BOK	2	Astrocyte
BP	GO:0006801	superoxide metabolic process	2/100	61/16917	0.0505358	0.181322	0.137883	NQO1/EDN1	2	Astrocyte
BP	GO:0044091	membrane biogenesis	2/100	61/16917	0.0505358	0.181322	0.137883	CAV2/CAV1	2	Astrocyte
BP	GO:0036294	cellular response to decreased oxygen levels	3/100	141/16917	0.0510961	0.182967	0.139133	LMNA/EDN1/CHCHD2	3	Astrocyte
CC	GO:0031253	cell projection membrane	5/100	341/16917	0.0516977	0.184752	0.140491	PDPN/CD44/TLN1/LIMA1/MSN	5	Astrocyte
BP	GO:0010675	regulation of cellular carbohydrate metabolic process	3/100	142/16917	0.0519826	0.185181	0.140817	PHLDA2/IGFBP3/IER3	3	Astrocyte
BP	GO:0010660	regulation of muscle cell apoptotic process	2/100	62/16917	0.052024	0.185181	0.140817	EDN1/CAPN2	2	Astrocyte
BP	GO:0032535	regulation of cellular component size	5/100	343/16917	0.0527624	0.186827	0.142069	EDN1/LIMA1/WDR1/MSN/PRR16	5	Astrocyte
MF	GO:0005543	phospholipid binding	6/100	456/16917	0.0533154	0.186827	0.142069	THBS1/AXL/PHLDA2/TLN1/ANXA3/SYTL2	6	Astrocyte
BP	GO:0001894	tissue homeostasis	4/100	239/16917	0.0533469	0.186827	0.142069	PRICKLE1/GJA1/VCL/CCN2	4	Astrocyte
BP	GO:0060249	anatomical structure homeostasis	4/100	239/16917	0.0533469	0.186827	0.142069	PRICKLE1/GJA1/VCL/CCN2	4	Astrocyte
BP	GO:0031100	animal organ regeneration	2/100	63/16917	0.0535279	0.186827	0.142069	AXL/ANXA3	2	Astrocyte
BP	GO:0034340	response to type I interferon	2/100	63/16917	0.0535279	0.186827	0.142069	IFITM3/IFITM2	2	Astrocyte
BP	GO:0046888	negative regulation of hormone secretion	2/100	63/16917	0.0535279	0.186827	0.142069	GJA1/EDN1	2	Astrocyte
BP	GO:0048524	positive regulation of viral process	2/100	63/16917	0.0535279	0.186827	0.142069	LGALS1/AXL	2	Astrocyte
BP	GO:0060760	positive regulation of response to cytokine stimulus	2/100	63/16917	0.0535279	0.186827	0.142069	AXL/EDN1	2	Astrocyte
BP	GO:0098781	ncRNA transcription	2/100	63/16917	0.0535279	0.186827	0.142069	CAVIN1/POLR2L	2	Astrocyte
CC	GO:0001650	fibrillar center	3/100	144/16917	0.0537779	0.186972	0.142179	FBLIM1/ANKRD1/KDM5D	3	Astrocyte
BP	GO:0001959	regulation of cytokine-mediated signaling pathway	3/100	144/16917	0.0537779	0.186972	0.142179	AXL/EDN1/CAV1	3	Astrocyte
MF	GO:0004252	serine-type endopeptidase activity	3/100	145/16917	0.0546866	0.189185	0.143862	MMP2/PLAU/PRSS23	3	Astrocyte
BP	GO:0010324	membrane invagination	2/100	64/16917	0.0550471	0.189185	0.143862	MYH9/THBS1	2	Astrocyte
BP	GO:0014823	response to activity	2/100	64/16917	0.0550471	0.189185	0.143862	MMP2/EDN1	2	Astrocyte
BP	GO:0043627	response to estrogen	2/100	64/16917	0.0550471	0.189185	0.143862	MMP2/CAV1	2	Astrocyte
BP	GO:0048278	vesicle docking	2/100	64/16917	0.0550471	0.189185	0.143862	CAV2/SYTL2	2	Astrocyte
BP	GO:0060389	pathway-restricted SMAD protein phosphorylation	2/100	64/16917	0.0550471	0.189185	0.143862	PMEPA1/TGFB2	2	Astrocyte
MF	GO:0008201	heparin binding	3/100	146/16917	0.0556028	0.190729	0.145036	THBS1/FSTL1/CCN2	3	Astrocyte
BP	GO:0010821	regulation of mitochondrion organization	3/100	147/16917	0.0565263	0.192651	0.146498	LMNA/IER3/BOK	3	Astrocyte
CC	GO:0005801	cis-Golgi network	2/100	65/16917	0.0565814	0.192651	0.146498	CCN2/BOK	2	Astrocyte
BP	GO:1903578	regulation of ATP metabolic process	2/100	65/16917	0.0565814	0.192651	0.146498	IER3/SLC2A6	2	Astrocyte
BP	GO:0061564	axon development	6/100	463/16917	0.0565926	0.192651	0.146498	MMP2/PRICKLE1/EDN1/PALLD/VCL/FLNA	6	Astrocyte
BP	GO:0051402	neuron apoptotic process	4/100	244/16917	0.0567306	0.192755	0.146577	NQO1/AXL/TGFB2/BOK	4	Astrocyte
BP	GO:0045165	cell fate commitment	4/100	246/16917	0.0581159	0.196396	0.149345	PDPN/EDN1/RUNX2/TGFB1I1	4	Astrocyte
BP	GO:0010657	muscle cell apoptotic process	2/100	66/16917	0.0581307	0.196396	0.149345	EDN1/CAPN2	2	Astrocyte
BP	GO:0060415	muscle tissue morphogenesis	2/100	66/16917	0.0581307	0.196396	0.149345	TGFB2/ANKRD1	2	Astrocyte
BP	GO:0070997	neuron death	5/100	353/16917	0.0582784	0.196525	0.149444	NQO1/AXL/TGFB2/BOK/CAPN2	5	Astrocyte
CC	GO:0042581	specific granule	3/100	149/16917	0.0583953	0.19655	0.149462	PLAU/VCL/ANXA3	3	Astrocyte
BP	GO:0035148	tube formation	3/100	150/16917	0.0593407	0.198319	0.150807	PRICKLE1/TGFB2/LUZP1	3	Astrocyte
BP	GO:1905952	regulation of lipid localization	3/100	150/16917	0.0593407	0.198319	0.150807	THBS1/EDN1/CAV1	3	Astrocyte
BP	GO:0014855	striated muscle cell proliferation	2/100	67/16917	0.0596946	0.198319	0.150807	CAV2/TGFB2	2	Astrocyte
BP	GO:0034394	protein localization to cell surface	2/100	67/16917	0.0596946	0.198319	0.150807	VCL/FLNA	2	Astrocyte
BP	GO:0046513	ceramide biosynthetic process	2/100	67/16917	0.0596946	0.198319	0.150807	ELOVL1/CCN1	2	Astrocyte
BP	GO:1904888	cranial skeletal system development	2/100	67/16917	0.0596946	0.198319	0.150807	RUNX2/TGFB2	2	Astrocyte
BP	GO:2000242	negative regulation of reproductive process	2/100	67/16917	0.0596946	0.198319	0.150807	MYH9/GJA1	2	Astrocyte
BP	GO:0060041	retina development in camera-type eye	3/100	151/16917	0.0602933	0.199937	0.152038	COL4A1/RHOJ/TGFB2	3	Astrocyte
BP	GO:0022411	cellular component disassembly	6/100	472/16917	0.0609823	0.201849	0.153492	MMP2/PRICKLE1/PDPN/LIMA1/WDR1/BOK	6	Astrocyte
BP	GO:0010950	positive regulation of endopeptidase activity	3/100	152/16917	0.0612531	0.202066	0.153657	CCN2/CCN1/BOK	3	Astrocyte
BP	GO:0048844	artery morphogenesis	2/100	68/16917	0.061273	0.202066	0.153657	EDN1/TGFB2	2	Astrocyte
CC	GO:0009898	cytoplasmic side of plasma membrane	3/100	153/16917	0.0622201	0.204813	0.155746	MYH9/FRMD6/CAV2	3	Astrocyte
BP	GO:0030330	DNA damage response, signal transduction by p53 class mediator	2/100	69/16917	0.0628656	0.205805	0.1565	CD44/ANKRD1	2	Astrocyte
BP	GO:0045661	regulation of myoblast differentiation	2/100	69/16917	0.0628656	0.205805	0.1565	PRICKLE1/IGFBP3	2	Astrocyte
BP	GO:0090559	regulation of membrane permeability	2/100	69/16917	0.0628656	0.205805	0.1565	IER3/BOK	2	Astrocyte
BP	GO:0060759	regulation of response to cytokine stimulus	3/100	154/16917	0.0631942	0.206504	0.157031	AXL/EDN1/CAV1	3	Astrocyte
MF	GO:0003725	double-stranded RNA binding	2/100	70/16917	0.0644723	0.209863	0.159586	ACTN1/MSN	2	Astrocyte
BP	GO:0007548	sex differentiation	4/100	255/16917	0.0645732	0.209863	0.159586	MMP2/AXL/TGFB2/BOK	4	Astrocyte
BP	GO:0051091	positive regulation of DNA-binding transcription factor activity	4/100	255/16917	0.0645732	0.209863	0.159586	EDN1/CAV1/ANXA3/TRIM22	4	Astrocyte
BP	GO:0007519	skeletal muscle tissue development	3/100	156/16917	0.0651638	0.211399	0.160754	CAV2/CAV1/ANKRD1	3	Astrocyte
BP	GO:0044089	positive regulation of cellular component biogenesis	6/100	482/16917	0.0660926	0.211946	0.16117	CAV1/RHOC/CCN2/LIMS1/CDC42EP1/MSN	6	Astrocyte
BP	GO:0003170	heart valve development	2/100	71/16917	0.0660928	0.211946	0.16117	TGFB2/CCN1	2	Astrocyte
CC	GO:0031594	neuromuscular junction	2/100	71/16917	0.0660928	0.211946	0.16117	SPOCK1/MYH9	2	Astrocyte
BP	GO:0055017	cardiac muscle tissue growth	2/100	71/16917	0.0660928	0.211946	0.16117	EDN1/TGFB2	2	Astrocyte
BP	GO:0070988	demethylation	2/100	71/16917	0.0660928	0.211946	0.16117	APOBEC3C/KDM5D	2	Astrocyte
BP	GO:0090307	mitotic spindle assembly	2/100	71/16917	0.0660928	0.211946	0.16117	PRICKLE1/FLNA	2	Astrocyte
BP	GO:0031214	biomineral tissue development	3/100	157/16917	0.0661591	0.211946	0.16117	COL1A1/PRICKLE1/CCN1	3	Astrocyte
BP	GO:0006606	protein import into nucleus	3/100	158/16917	0.0671615	0.212923	0.161913	PRICKLE1/LMNA/FLNA	3	Astrocyte
BP	GO:0006937	regulation of muscle contraction	3/100	158/16917	0.0671615	0.212923	0.161913	EDN1/CAV1/CCN2	3	Astrocyte
BP	GO:0034250	positive regulation of amide metabolic process	3/100	158/16917	0.0671615	0.212923	0.161913	THBS1/CCN1/PRR16	3	Astrocyte
BP	GO:2001242	regulation of intrinsic apoptotic signaling pathway	3/100	158/16917	0.0671615	0.212923	0.161913	CD44/CAV1/BOK	3	Astrocyte
BP	GO:0043154	negative regulation of cysteine-type endopeptidase activity involved in apoptotic process	2/100	72/16917	0.0677268	0.212923	0.161913	THBS1/CD44	2	Astrocyte
BP	GO:0043299	leukocyte degranulation	2/100	72/16917	0.0677268	0.212923	0.161913	S100A13/ANXA3	2	Astrocyte
BP	GO:0048644	muscle organ morphogenesis	2/100	72/16917	0.0677268	0.212923	0.161913	TGFB2/ANKRD1	2	Astrocyte
BP	GO:0055117	regulation of cardiac muscle contraction	2/100	72/16917	0.0677268	0.212923	0.161913	CAV1/CCN2	2	Astrocyte
BP	GO:0071260	cellular response to mechanical stimulus	2/100	72/16917	0.0677268	0.212923	0.161913	COL1A1/ANKRD1	2	Astrocyte
BP	GO:0072091	regulation of stem cell proliferation	2/100	72/16917	0.0677268	0.212923	0.161913	GJA1/RUNX2	2	Astrocyte
CC	GO:0016324	apical plasma membrane	5/100	369/16917	0.0677698	0.212923	0.161913	FRMD6/GJA1/PDPN/CD44/MSN	5	Astrocyte
BP	GO:0021915	neural tube development	3/100	160/16917	0.0691871	0.216617	0.164722	PRICKLE1/TGFB2/LUZP1	3	Astrocyte
BP	GO:1902850	microtubule cytoskeleton organization involved in mitosis	3/100	160/16917	0.0691871	0.216617	0.164722	PRICKLE1/GJA1/FLNA	3	Astrocyte
BP	GO:0032890	regulation of organic acid transport	2/100	73/16917	0.0693743	0.216825	0.16488	THBS1/EDN1	2	Astrocyte
BP	GO:0010638	positive regulation of organelle organization	6/100	489/16917	0.0698159	0.217447	0.165353	EDN1/RHOC/CCN2/WDR1/MSN/BOK	6	Astrocyte
CC	GO:0043025	neuronal cell body	6/100	489/16917	0.0698159	0.217447	0.165353	NQO1/TGFB2/PDE1C/FLNA/ANXA3/CAPN2	6	Astrocyte
BP	GO:0042110	T cell activation	6/100	490/16917	0.0703576	0.218755	0.166348	MYH9/LGALS1/CD44/CAV1/RUNX2/MSN	6	Astrocyte
BP	GO:0001736	establishment of planar polarity	2/100	74/16917	0.0710348	0.21934	0.166793	PRICKLE1/WDR1	2	Astrocyte
MF	GO:0004867	serine-type endopeptidase inhibitor activity	2/100	74/16917	0.0710348	0.21934	0.166793	SPOCK1/SERPINE1	2	Astrocyte
BP	GO:0007164	establishment of tissue polarity	2/100	74/16917	0.0710348	0.21934	0.166793	PRICKLE1/WDR1	2	Astrocyte
BP	GO:2000736	regulation of stem cell differentiation	2/100	74/16917	0.0710348	0.21934	0.166793	PRICKLE1/TGFB2	2	Astrocyte
BP	GO:0051170	import into nucleus	3/100	163/16917	0.0722773	0.222793	0.169418	PRICKLE1/LMNA/FLNA	3	Astrocyte
BP	GO:0007193	adenylate cyclase-inhibiting G protein-coupled receptor signaling pathway	2/100	75/16917	0.0727084	0.223737	0.170136	EDN1/FLNA	2	Astrocyte
BP	GO:0009896	positive regulation of catabolic process	6/100	495/16917	0.0731029	0.224566	0.170767	PRICKLE1/CAV1/IER3/SH3BP4/MSN/TRIM22	6	Astrocyte
BP	GO:0072331	signal transduction by p53 class mediator	3/100	164/16917	0.073321	0.224851	0.170983	CD44/ANKRD1/BOK	3	Astrocyte
BP	GO:0032102	negative regulation of response to external stimulus	5/100	378/16917	0.073467	0.224914	0.171032	PLAU/THBS1/EDN1/SERPINE1/IER3	5	Astrocyte
BP	GO:0019932	second-messenger-mediated signaling	4/100	267/16917	0.0737446	0.22538	0.171385	THBS1/EDN1/LMCD1/CAP1	4	Astrocyte
MF	GO:0008236	serine-type peptidase activity	3/100	165/16917	0.0743714	0.225828	0.171726	MMP2/PLAU/PRSS23	3	Astrocyte
BP	GO:0071674	mononuclear cell migration	3/100	165/16917	0.0743714	0.225828	0.171726	THBS1/SERPINE1/MSN	3	Astrocyte
CC	GO:0030670	phagocytic vesicle membrane	2/100	76/16917	0.0743947	0.225828	0.171726	RAB34/ANXA3	2	Astrocyte
BP	GO:0046889	positive regulation of lipid biosynthetic process	2/100	76/16917	0.0743947	0.225828	0.171726	CCN1/CAPN2	2	Astrocyte
BP	GO:0001701	in utero embryonic development	5/100	381/16917	0.075423	0.22781	0.173233	MYH9/EDN1/PHLDA2/CCN1/CAPN2	5	Astrocyte
BP	GO:0010952	positive regulation of peptidase activity	3/100	166/16917	0.0754286	0.22781	0.173233	CCN2/CCN1/BOK	3	Astrocyte
BP	GO:0048469	cell maturation	3/100	166/16917	0.0754286	0.22781	0.173233	AXL/EDN1/RUNX2	3	Astrocyte
BP	GO:0030099	myeloid cell differentiation	5/100	382/16917	0.0760813	0.228281	0.173591	MYH9/CDKN2B/ACTN1/WDR1/FLNA	5	Astrocyte
BP	GO:0042632	cholesterol homeostasis	2/100	77/16917	0.0760935	0.228281	0.173591	CAV1/LIMA1	2	Astrocyte
BP	GO:0051851	modulation by host of symbiont process	2/100	77/16917	0.0760935	0.228281	0.173591	CAV2/ZBED1	2	Astrocyte
BP	GO:1903351	cellular response to dopamine	2/100	77/16917	0.0760935	0.228281	0.173591	CAV2/FLNA	2	Astrocyte
BP	GO:0048736	appendage development	3/100	167/16917	0.0764925	0.228332	0.17363	PRICKLE1/RUNX2/TGFB2	3	Astrocyte
BP	GO:0060173	limb development	3/100	167/16917	0.0764925	0.228332	0.17363	PRICKLE1/RUNX2/TGFB2	3	Astrocyte
BP	GO:1990138	neuron projection extension	3/100	167/16917	0.0764925	0.228332	0.17363	PRICKLE1/EDN1/VCL	3	Astrocyte
BP	GO:0060538	skeletal muscle organ development	3/100	168/16917	0.0775631	0.229198	0.174289	CAV2/CAV1/ANKRD1	3	Astrocyte
CC	GO:0045178	basal part of cell	4/100	272/16917	0.0777524	0.229198	0.174289	PDPN/EDN1/CD44/MSN	4	Astrocyte
BP	GO:0051607	defense response to virus	4/100	272/16917	0.0777524	0.229198	0.174289	IFITM3/IFITM2/APOBEC3C/TRIM22	4	Astrocyte
BP	GO:0055092	sterol homeostasis	2/100	78/16917	0.0778047	0.229198	0.174289	CAV1/LIMA1	2	Astrocyte
BP	GO:0060395	SMAD protein signal transduction	2/100	78/16917	0.0778047	0.229198	0.174289	RUNX2/TGFB2	2	Astrocyte
BP	GO:0072332	intrinsic apoptotic signaling pathway by p53 class mediator	2/100	78/16917	0.0778047	0.229198	0.174289	CD44/BOK	2	Astrocyte
BP	GO:0140888	interferon-mediated signaling pathway	2/100	78/16917	0.0778047	0.229198	0.174289	IFITM3/IFITM2	2	Astrocyte
BP	GO:1903350	response to dopamine	2/100	78/16917	0.0778047	0.229198	0.174289	CAV2/FLNA	2	Astrocyte
BP	GO:0140546	defense response to symbiont	4/100	273/16917	0.0785669	0.229748	0.174707	IFITM3/IFITM2/APOBEC3C/TRIM22	4	Astrocyte
MF	GO:0017171	serine hydrolase activity	3/100	169/16917	0.0786402	0.229748	0.174707	MMP2/PLAU/PRSS23	3	Astrocyte
BP	GO:0071466	cellular response to xenobiotic stimulus	3/100	169/16917	0.0786402	0.229748	0.174707	NQO1/EDN1/ANKRD1	3	Astrocyte
BP	GO:0048608	reproductive structure development	4/100	274/16917	0.0793857	0.229748	0.174707	MMP2/AXL/TGFB2/BOK	4	Astrocyte
BP	GO:0006096	glycolytic process	2/100	79/16917	0.079528	0.229748	0.174707	IER3/SLC2A6	2	Astrocyte
BP	GO:0019362	pyridine nucleotide metabolic process	2/100	79/16917	0.079528	0.229748	0.174707	NQO1/TP53I3	2	Astrocyte
BP	GO:0019935	cyclic-nucleotide-mediated signaling	2/100	79/16917	0.079528	0.229748	0.174707	THBS1/CAP1	2	Astrocyte
BP	GO:0046496	nicotinamide nucleotide metabolic process	2/100	79/16917	0.079528	0.229748	0.174707	NQO1/TP53I3	2	Astrocyte
BP	GO:0060191	regulation of lipase activity	2/100	79/16917	0.079528	0.229748	0.174707	RHOC/CCN1	2	Astrocyte
BP	GO:0060419	heart growth	2/100	79/16917	0.079528	0.229748	0.174707	EDN1/TGFB2	2	Astrocyte
BP	GO:1901379	regulation of potassium ion transmembrane transport	2/100	79/16917	0.079528	0.229748	0.174707	CAV1/FLNA	2	Astrocyte
BP	GO:2000117	negative regulation of cysteine-type endopeptidase activity	2/100	79/16917	0.079528	0.229748	0.174707	THBS1/CD44	2	Astrocyte
CC	GO:0005581	collagen trimer	2/100	80/16917	0.0812632	0.232144	0.176529	COL1A1/COL4A1	2	Astrocyte
BP	GO:0006757	ATP generation from ADP	2/100	80/16917	0.0812632	0.232144	0.176529	IER3/SLC2A6	2	Astrocyte
MF	GO:0016651	oxidoreductase activity, acting on NAD(P)H	2/100	80/16917	0.0812632	0.232144	0.176529	NQO1/TP53I3	2	Astrocyte
BP	GO:0032370	positive regulation of lipid transport	2/100	80/16917	0.0812632	0.232144	0.176529	EDN1/CAV1	2	Astrocyte
BP	GO:0033273	response to vitamin	2/100	80/16917	0.0812632	0.232144	0.176529	COL1A1/RUNX2	2	Astrocyte
BP	GO:0140056	organelle localization by membrane tethering	2/100	80/16917	0.0812632	0.232144	0.176529	CAV2/SYTL2	2	Astrocyte
BP	GO:1905897	regulation of response to endoplasmic reticulum stress	2/100	80/16917	0.0812632	0.232144	0.176529	CAV1/BOK	2	Astrocyte
BP	GO:0043405	regulation of MAP kinase activity	3/100	172/16917	0.0819112	0.233623	0.177654	THBS1/EDN1/CAV1	3	Astrocyte
BP	GO:0061458	reproductive system development	4/100	278/16917	0.0827038	0.235509	0.179088	MMP2/AXL/TGFB2/BOK	4	Astrocyte
BP	GO:0030593	neutrophil chemotaxis	2/100	81/16917	0.0830102	0.235645	0.179192	EDN1/TGFB2	2	Astrocyte
BP	GO:0007565	female pregnancy	3/100	173/16917	0.0830145	0.235645	0.179192	MMP2/GJA1/CAPN2	3	Astrocyte
BP	GO:0008361	regulation of cell size	3/100	174/16917	0.0841242	0.238414	0.181297	EDN1/MSN/PRR16	3	Astrocyte
BP	GO:0097193	intrinsic apoptotic signaling pathway	4/100	280/16917	0.0843883	0.238414	0.181297	CD44/CAV1/IER3/BOK	4	Astrocyte
BP	GO:0140014	mitotic nuclear division	4/100	280/16917	0.0843883	0.238414	0.181297	PRICKLE1/CAV2/EDN1/FLNA	4	Astrocyte
BP	GO:0001892	embryonic placenta development	2/100	83/16917	0.0865386	0.242578	0.184464	PHLDA2/CCN1	2	Astrocyte
CC	GO:0005758	mitochondrial intermembrane space	2/100	83/16917	0.0865386	0.242578	0.184464	CHCHD2/CAPN2	2	Astrocyte
BP	GO:0006140	regulation of nucleotide metabolic process	2/100	83/16917	0.0865386	0.242578	0.184464	IER3/SLC2A6	2	Astrocyte
BP	GO:0048145	regulation of fibroblast proliferation	2/100	83/16917	0.0865386	0.242578	0.184464	CAV1/FOSL2	2	Astrocyte
BP	GO:1900542	regulation of purine nucleotide metabolic process	2/100	83/16917	0.0865386	0.242578	0.184464	IER3/SLC2A6	2	Astrocyte
BP	GO:0043434	response to peptide hormone	5/100	398/16917	0.0870391	0.243601	0.185241	COL1A1/CAV2/EDN1/CAV1/CCN2	5	Astrocyte
BP	GO:0008625	extrinsic apoptotic signaling pathway via death domain receptors	2/100	84/16917	0.0883196	0.245494	0.186681	THBS1/SERPINE1	2	Astrocyte
BP	GO:0042475	odontogenesis of dentin-containing tooth	2/100	84/16917	0.0883196	0.245494	0.186681	RUNX2/SERPINE1	2	Astrocyte
BP	GO:1901879	regulation of protein depolymerization	2/100	84/16917	0.0883196	0.245494	0.186681	LIMA1/WDR1	2	Astrocyte
CC	GO:0031256	leading edge membrane	3/100	178/16917	0.0886268	0.245494	0.186681	PDPN/CD44/TLN1	3	Astrocyte
BP	GO:0032872	regulation of stress-activated MAPK cascade	3/100	178/16917	0.0886268	0.245494	0.186681	GADD45B/CCN2/TGFB2	3	Astrocyte
BP	GO:0042770	signal transduction in response to DNA damage	3/100	178/16917	0.0886268	0.245494	0.186681	CD44/IER3/ANKRD1	3	Astrocyte
BP	GO:0030522	intracellular receptor signaling pathway	4/100	285/16917	0.0886733	0.245494	0.186681	PMEPA1/CAV1/ACTN4/KDM5D	4	Astrocyte
BP	GO:0033674	positive regulation of kinase activity	5/100	401/16917	0.0891819	0.246521	0.187462	THBS1/AXL/EDN1/TGFB2/CCN1	5	Astrocyte
BP	GO:0070371	ERK1 and ERK2 cascade	4/100	286/16917	0.0895428	0.247138	0.187931	EDN1/CD44/CCN2/CCN1	4	Astrocyte
BP	GO:0008589	regulation of smoothened signaling pathway	2/100	85/16917	0.0901116	0.247565	0.188256	RUNX2/RAB34	2	Astrocyte
BP	GO:0050886	endocrine process	2/100	85/16917	0.0901116	0.247565	0.188256	GJA1/EDN1	2	Astrocyte
BP	GO:0072524	pyridine-containing compound metabolic process	2/100	85/16917	0.0901116	0.247565	0.188256	NQO1/TP53I3	2	Astrocyte
BP	GO:0003073	regulation of systemic arterial blood pressure	2/100	86/16917	0.0919143	0.250641	0.190595	EDN1/IER3	2	Astrocyte
MF	GO:0004896	cytokine receptor activity	2/100	86/16917	0.0919143	0.250641	0.190595	CD44/IL13RA1	2	Astrocyte
BP	GO:0033138	positive regulation of peptidyl-serine phosphorylation	2/100	86/16917	0.0919143	0.250641	0.190595	CD44/CAV1	2	Astrocyte
BP	GO:0033555	multicellular organismal response to stress	2/100	86/16917	0.0919143	0.250641	0.190595	THBS1/CAPN2	2	Astrocyte
BP	GO:0030308	negative regulation of cell growth	3/100	181/16917	0.0920694	0.250641	0.190595	GJA1/TGFB2/SH3BP4	3	Astrocyte
BP	GO:0070302	regulation of stress-activated protein kinase signaling cascade	3/100	181/16917	0.0920694	0.250641	0.190595	GADD45B/CCN2/TGFB2	3	Astrocyte
BP	GO:0060070	canonical Wnt signaling pathway	4/100	290/16917	0.0930622	0.25296	0.192358	COL1A1/PRICKLE1/EDN1/CAV1	4	Astrocyte
MF	GO:0008013	beta-catenin binding	2/100	87/16917	0.0937277	0.253616	0.192857	GJA1/VCL	2	Astrocyte
BP	GO:0043535	regulation of blood vessel endothelial cell migration	2/100	87/16917	0.0937277	0.253616	0.192857	THBS1/RHOJ	2	Astrocyte
BP	GO:0051492	regulation of stress fiber assembly	2/100	87/16917	0.0937277	0.253616	0.192857	RHOC/CCN2	2	Astrocyte
BP	GO:0046031	ADP metabolic process	2/100	88/16917	0.0955514	0.257043	0.195463	IER3/SLC2A6	2	Astrocyte
MF	GO:0003714	transcription corepressor activity	3/100	184/16917	0.0955672	0.257043	0.195463	LMCD1/ANKRD1/TRIM22	3	Astrocyte
BP	GO:0007369	gastrulation	3/100	184/16917	0.0955672	0.257043	0.195463	MMP2/PRICKLE1/GJA1	3	Astrocyte
BP	GO:0034284	response to monosaccharide	3/100	184/16917	0.0955672	0.257043	0.195463	THBS1/RUNX2/CCN2	3	Astrocyte
CC	GO:0030666	endocytic vesicle membrane	3/100	185/16917	0.0967453	0.259433	0.197281	CAV1/RAB34/ANXA3	3	Astrocyte
BP	GO:0097553	calcium ion transmembrane import into cytosol	3/100	185/16917	0.0967453	0.259433	0.197281	CAV1/CCN2/FLNA	3	Astrocyte
BP	GO:0007029	endoplasmic reticulum organization	2/100	89/16917	0.0973854	0.259598	0.197406	CAV2/TRAM2	2	Astrocyte
CC	GO:0016528	sarcoplasm	2/100	89/16917	0.0973854	0.259598	0.197406	SPOCK1/THBS1	2	Astrocyte
BP	GO:0045185	maintenance of protein location	2/100	89/16917	0.0973854	0.259598	0.197406	CAV1/FLNA	2	Astrocyte
BP	GO:0046330	positive regulation of JNK cascade	2/100	89/16917	0.0973854	0.259598	0.197406	GADD45B/CCN2	2	Astrocyte
CC	GO:0098562	cytoplasmic side of membrane	3/100	186/16917	0.0979292	0.26066	0.198214	MYH9/FRMD6/CAV2	3	Astrocyte
BP	GO:0022409	positive regulation of cell-cell adhesion	4/100	296/16917	0.0984638	0.261695	0.199001	LGALS1/PDPN/CD44/CAV1	4	Astrocyte
BP	GO:0002275	myeloid cell activation involved in immune response	2/100	90/16917	0.0992294	0.261791	0.199073	S100A13/ANXA3	2	Astrocyte
BP	GO:0006942	regulation of striated muscle contraction	2/100	90/16917	0.0992294	0.261791	0.199073	CAV1/CCN2	2	Astrocyte
BP	GO:0045807	positive regulation of endocytosis	2/100	90/16917	0.0992294	0.261791	0.199073	AXL/SERPINE1	2	Astrocyte
BP	GO:0060349	bone morphogenesis	2/100	90/16917	0.0992294	0.261791	0.199073	COL1A1/RUNX2	2	Astrocyte
BP	GO:0070828	heterochromatin organization	2/100	90/16917	0.0992294	0.261791	0.199073	LMNA/LOXL2	2	Astrocyte
BP	GO:0034504	protein localization to nucleus	4/100	297/16917	0.0993782	0.261798	0.199079	COL1A1/PRICKLE1/LMNA/FLNA	4	Astrocyte
CC	GO:0031965	nuclear membrane	4/100	298/16917	0.100297	0.262723	0.199782	PRICKLE1/LMNA/BOK/ZBED1	4	Astrocyte
BP	GO:0042063	gliogenesis	4/100	298/16917	0.100297	0.262723	0.199782	CDKN2B/WDR1/TGFB2/BOK	4	Astrocyte
BP	GO:0062012	regulation of small molecule metabolic process	4/100	298/16917	0.100297	0.262723	0.199782	CAV1/IGFBP3/IER3/SLC2A6	4	Astrocyte
MF	GO:0061134	peptidase regulator activity	3/100	188/16917	0.100315	0.262723	0.199782	SPOCK1/CAV1/SERPINE1	3	Astrocyte
BP	GO:0001843	neural tube closure	2/100	91/16917	0.101083	0.263581	0.200434	PRICKLE1/TGFB2	2	Astrocyte
BP	GO:0071868	cellular response to monoamine stimulus	2/100	91/16917	0.101083	0.263581	0.200434	CAV2/FLNA	2	Astrocyte
BP	GO:0071870	cellular response to catecholamine stimulus	2/100	91/16917	0.101083	0.263581	0.200434	CAV2/FLNA	2	Astrocyte
BP	GO:0051090	regulation of DNA-binding transcription factor activity	5/100	418/16917	0.10184	0.265168	0.201642	EDN1/CAV1/FLNA/ANXA3/TRIM22	5	Astrocyte
BP	GO:0032436	positive regulation of proteasomal ubiquitin-dependent protein catabolic process	2/100	92/16917	0.102947	0.266119	0.202365	PRICKLE1/CAV1	2	Astrocyte
BP	GO:0043266	regulation of potassium ion transport	2/100	92/16917	0.102947	0.266119	0.202365	CAV1/FLNA	2	Astrocyte
BP	GO:0048534	hematopoietic or lymphoid organ development	2/100	92/16917	0.102947	0.266119	0.202365	CDKN2B/PDPN	2	Astrocyte
BP	GO:0051341	regulation of oxidoreductase activity	2/100	92/16917	0.102947	0.266119	0.202365	EDN1/CAV1	2	Astrocyte
BP	GO:0060606	tube closure	2/100	92/16917	0.102947	0.266119	0.202365	PRICKLE1/TGFB2	2	Astrocyte
CC	GO:0031970	organelle envelope lumen	2/100	93/16917	0.10482	0.270182	0.205455	CHCHD2/CAPN2	2	Astrocyte
BP	GO:0090398	cellular senescence	2/100	93/16917	0.10482	0.270182	0.205455	LMNA/CDKN2B	2	Astrocyte
BP	GO:0007051	spindle organization	3/100	193/16917	0.106381	0.273073	0.207652	MYH9/PRICKLE1/FLNA	3	Astrocyte
BP	GO:0061326	renal tubule development	2/100	94/16917	0.106702	0.273073	0.207652	PRICKLE1/COL4A1	2	Astrocyte
BP	GO:0071867	response to monoamine	2/100	94/16917	0.106702	0.273073	0.207652	CAV2/FLNA	2	Astrocyte
BP	GO:0071869	response to catecholamine	2/100	94/16917	0.106702	0.273073	0.207652	CAV2/FLNA	2	Astrocyte
BP	GO:0120162	positive regulation of cold-induced thermogenesis	2/100	94/16917	0.106702	0.273073	0.207652	GJA1/CAV1	2	Astrocyte
BP	GO:0051656	establishment of organelle localization	5/100	426/16917	0.108095	0.276242	0.210062	MYH9/S100A13/LMNA/GJA1/ACTN4	5	Astrocyte
BP	GO:0006165	nucleoside diphosphate phosphorylation	2/100	95/16917	0.108594	0.277123	0.210732	IER3/SLC2A6	2	Astrocyte
MF	GO:0005516	calmodulin binding	3/100	195/16917	0.108847	0.277375	0.210924	MYH9/CALD1/PDE1C	3	Astrocyte
MF	GO:0004857	enzyme inhibitor activity	4/100	308/16917	0.109697	0.279143	0.212269	SPOCK1/SERPINE1/PARVA/ANXA3	4	Astrocyte
MF	GO:0004197	cysteine-type endopeptidase activity	2/100	96/16917	0.110494	0.280396	0.213222	USP9Y/CAPN2	2	Astrocyte
MF	GO:0003924	GTPase activity	4/100	309/16917	0.110658	0.280396	0.213222	RHOJ/RHOC/RAB34/TUBB6	4	Astrocyte
BP	GO:1904062	regulation of monoatomic cation transmembrane transport	4/100	309/16917	0.110658	0.280396	0.213222	EDN1/CAV1/ACTN4/FLNA	4	Astrocyte
BP	GO:0016055	Wnt signaling pathway	5/100	431/16917	0.112098	0.282822	0.215066	COL1A1/PRICKLE1/EDN1/CAV1/TGFB1I1	5	Astrocyte
CC	GO:0045177	apical part of cell	5/100	431/16917	0.112098	0.282822	0.215066	FRMD6/GJA1/PDPN/CD44/MSN	5	Astrocyte
BP	GO:0002027	regulation of heart rate	2/100	97/16917	0.112404	0.282822	0.215066	EDN1/CAV1	2	Astrocyte
BP	GO:0046939	nucleotide phosphorylation	2/100	97/16917	0.112404	0.282822	0.215066	IER3/SLC2A6	2	Astrocyte
BP	GO:0048709	oligodendrocyte differentiation	2/100	97/16917	0.112404	0.282822	0.215066	WDR1/BOK	2	Astrocyte
BP	GO:0071383	cellular response to steroid hormone stimulus	3/100	198/16917	0.112588	0.282889	0.215117	PMEPA1/EDN1/KDM5D	3	Astrocyte
BP	GO:0198738	cell-cell signaling by wnt	5/100	433/16917	0.11372	0.285333	0.216975	COL1A1/PRICKLE1/EDN1/CAV1/TGFB1I1	5	Astrocyte
BP	GO:0030510	regulation of BMP signaling pathway	2/100	98/16917	0.114322	0.285645	0.217213	FSTL1/CCN1	2	Astrocyte
BP	GO:0051897	positive regulation of protein kinase B signaling	2/100	98/16917	0.114322	0.285645	0.217213	THBS1/AXL	2	Astrocyte
BP	GO:0071346	cellular response to type II interferon	2/100	98/16917	0.114322	0.285645	0.217213	EDN1/ZYX	2	Astrocyte
BP	GO:0071496	cellular response to external stimulus	4/100	313/16917	0.114541	0.285796	0.217328	COL1A1/CDKN2B/AXL/ANKRD1	4	Astrocyte
BP	GO:0030100	regulation of endocytosis	3/100	200/16917	0.115109	0.286814	0.218102	AXL/CAV1/SERPINE1	3	Astrocyte
BP	GO:0033209	tumor necrosis factor-mediated signaling pathway	2/100	99/16917	0.116248	0.28869	0.219528	LIMS1/ACTN4	2	Astrocyte
BP	GO:0048144	fibroblast proliferation	2/100	99/16917	0.116248	0.28869	0.219528	CAV1/FOSL2	2	Astrocyte
BP	GO:0006469	negative regulation of protein kinase activity	3/100	201/16917	0.116378	0.28869	0.219528	CDKN2B/CAV1/GADD45B	3	Astrocyte
BP	GO:0043010	camera-type eye development	4/100	315/16917	0.116506	0.28869	0.219528	PRICKLE1/COL4A1/RHOJ/TGFB2	4	Astrocyte
BP	GO:0009135	purine nucleoside diphosphate metabolic process	2/100	100/16917	0.118183	0.291637	0.22177	IER3/SLC2A6	2	Astrocyte
BP	GO:0009179	purine ribonucleoside diphosphate metabolic process	2/100	100/16917	0.118183	0.291637	0.22177	IER3/SLC2A6	2	Astrocyte
BP	GO:1901890	positive regulation of cell junction assembly	2/100	100/16917	0.118183	0.291637	0.22177	CAV1/LIMS1	2	Astrocyte
BP	GO:0050920	regulation of chemotaxis	3/100	203/16917	0.118931	0.292807	0.222659	THBS1/EDN1/SERPINE1	3	Astrocyte
BP	GO:0006913	nucleocytoplasmic transport	4/100	318/16917	0.11948	0.292807	0.222659	PRICKLE1/LMNA/IER3/FLNA	4	Astrocyte
BP	GO:0051169	nuclear transport	4/100	318/16917	0.11948	0.292807	0.222659	PRICKLE1/LMNA/IER3/FLNA	4	Astrocyte
BP	GO:0006672	ceramide metabolic process	2/100	101/16917	0.120126	0.292807	0.222659	ELOVL1/CCN1	2	Astrocyte
BP	GO:0030301	cholesterol transport	2/100	101/16917	0.120126	0.292807	0.222659	CAV1/LIMA1	2	Astrocyte
CC	GO:0032587	ruffle membrane	2/100	101/16917	0.120126	0.292807	0.222659	PDPN/TLN1	2	Astrocyte
BP	GO:0051702	biological process involved in interaction with symbiont	2/100	101/16917	0.120126	0.292807	0.222659	CAV2/ZBED1	2	Astrocyte
BP	GO:0072089	stem cell proliferation	2/100	101/16917	0.120126	0.292807	0.222659	GJA1/RUNX2	2	Astrocyte
BP	GO:1905954	positive regulation of lipid localization	2/100	101/16917	0.120126	0.292807	0.222659	EDN1/CAV1	2	Astrocyte
BP	GO:0032526	response to retinoic acid	2/100	102/16917	0.122077	0.296354	0.225357	MMP2/COL1A1	2	Astrocyte
BP	GO:0033559	unsaturated fatty acid metabolic process	2/100	102/16917	0.122077	0.296354	0.225357	EDN1/ELOVL1	2	Astrocyte
BP	GO:1901796	regulation of signal transduction by p53 class mediator	2/100	102/16917	0.122077	0.296354	0.225357	CD44/ANKRD1	2	Astrocyte
BP	GO:0008406	gonad development	3/100	207/16917	0.1241	0.300859	0.228782	MMP2/TGFB2/BOK	3	Astrocyte
BP	GO:0006090	pyruvate metabolic process	2/100	104/16917	0.126002	0.303828	0.231039	IER3/SLC2A6	2	Astrocyte
BP	GO:0006939	smooth muscle contraction	2/100	104/16917	0.126002	0.303828	0.231039	EDN1/CAV1	2	Astrocyte
BP	GO:0090263	positive regulation of canonical Wnt signaling pathway	2/100	104/16917	0.126002	0.303828	0.231039	COL1A1/CAV1	2	Astrocyte
BP	GO:1904659	glucose transmembrane transport	2/100	104/16917	0.126002	0.303828	0.231039	EDN1/SLC2A6	2	Astrocyte
BP	GO:0046822	regulation of nucleocytoplasmic transport	2/100	105/16917	0.127976	0.308173	0.234344	IER3/FLNA	2	Astrocyte
BP	GO:0015908	fatty acid transport	2/100	106/16917	0.129957	0.311273	0.236701	THBS1/EDN1	2	Astrocyte
CC	GO:0030175	filopodium	2/100	106/16917	0.129957	0.311273	0.236701	PDPN/MSN	2	Astrocyte
BP	GO:0032414	positive regulation of ion transmembrane transporter activity	2/100	106/16917	0.129957	0.311273	0.236701	EDN1/ACTN4	2	Astrocyte
BP	GO:0048706	embryonic skeletal system development	2/100	106/16917	0.129957	0.311273	0.236701	COL1A1/RUNX2	2	Astrocyte
CC	GO:0030139	endocytic vesicle	4/100	329/16917	0.130664	0.312158	0.237374	CAV1/RAB34/ANXA3/ZYX	4	Astrocyte
BP	GO:0045137	development of primary sexual characteristics	3/100	212/16917	0.130675	0.312158	0.237374	MMP2/TGFB2/BOK	3	Astrocyte
BP	GO:0008645	hexose transmembrane transport	2/100	107/16917	0.131946	0.313663	0.238519	EDN1/SLC2A6	2	Astrocyte
MF	GO:0019208	phosphatase regulator activity	2/100	107/16917	0.131946	0.313663	0.238519	RUNX2/IGFBP3	2	Astrocyte
BP	GO:0030518	intracellular steroid hormone receptor signaling pathway	2/100	107/16917	0.131946	0.313663	0.238519	PMEPA1/KDM5D	2	Astrocyte
BP	GO:0002274	myeloid leukocyte activation	3/100	213/16917	0.132004	0.313663	0.238519	S100A13/THBS1/ANXA3	3	Astrocyte
BP	GO:0070588	calcium ion transmembrane transport	4/100	332/16917	0.133788	0.317007	0.241061	EDN1/CAV1/CCN2/FLNA	4	Astrocyte
BP	GO:0002065	columnar/cuboidal epithelial cell differentiation	2/100	108/16917	0.133942	0.317007	0.241061	CAV1/SERPINE1	2	Astrocyte
BP	GO:0030148	sphingolipid biosynthetic process	2/100	108/16917	0.133942	0.317007	0.241061	ELOVL1/CCN1	2	Astrocyte
BP	GO:0045055	regulated exocytosis	3/100	215/16917	0.134678	0.31833	0.242067	MYH9/S100A13/ANXA3	3	Astrocyte
BP	GO:0006887	exocytosis	4/100	334/16917	0.135888	0.319638	0.243062	MYH9/S100A13/ANXA3/SYTL2	4	Astrocyte
BP	GO:0042177	negative regulation of protein catabolic process	2/100	109/16917	0.135944	0.319638	0.243062	NQO1/FLNA	2	Astrocyte
BP	GO:0043406	positive regulation of MAP kinase activity	2/100	109/16917	0.135944	0.319638	0.243062	THBS1/EDN1	2	Astrocyte
BP	GO:2000060	positive regulation of ubiquitin-dependent protein catabolic process	2/100	109/16917	0.135944	0.319638	0.243062	PRICKLE1/CAV1	2	Astrocyte
BP	GO:0048588	developmental cell growth	3/100	217/16917	0.137371	0.321109	0.244181	PRICKLE1/EDN1/VCL	3	Astrocyte
BP	GO:0002698	negative regulation of immune effector process	2/100	110/16917	0.137953	0.321109	0.244181	AXL/TGFB2	2	Astrocyte
BP	GO:0002718	regulation of cytokine production involved in immune response	2/100	110/16917	0.137953	0.321109	0.244181	AXL/TGFB2	2	Astrocyte
BP	GO:0009185	ribonucleoside diphosphate metabolic process	2/100	110/16917	0.137953	0.321109	0.244181	IER3/SLC2A6	2	Astrocyte
BP	GO:0015749	monosaccharide transmembrane transport	2/100	110/16917	0.137953	0.321109	0.244181	EDN1/SLC2A6	2	Astrocyte
BP	GO:0030278	regulation of ossification	2/100	110/16917	0.137953	0.321109	0.244181	RUNX2/CCN1	2	Astrocyte
MF	GO:0031490	chromatin DNA binding	2/100	110/16917	0.137953	0.321109	0.244181	RUNX2/ACTN4	2	Astrocyte
BP	GO:0050727	regulation of inflammatory response	4/100	336/16917	0.138002	0.321109	0.244181	LGALS1/SERPINE1/IER3/ZYX	4	Astrocyte
BP	GO:0071900	regulation of protein serine/threonine kinase activity	4/100	337/16917	0.139064	0.323161	0.245741	THBS1/CDKN2B/EDN1/CAV1	4	Astrocyte
BP	GO:0006091	generation of precursor metabolites and energy	5/100	463/16917	0.139372	0.323459	0.245968	PHLDA2/CHCHD2/IER3/LOXL2/SLC2A6	5	Astrocyte
BP	GO:0071901	negative regulation of protein serine/threonine kinase activity	2/100	111/16917	0.139969	0.324375	0.246665	CDKN2B/CAV1	2	Astrocyte
BP	GO:0045860	positive regulation of protein kinase activity	4/100	338/16917	0.140129	0.324375	0.246665	THBS1/EDN1/TGFB2/CCN1	4	Astrocyte
BP	GO:0002367	cytokine production involved in immune response	2/100	112/16917	0.141992	0.327219	0.248827	AXL/TGFB2	2	Astrocyte
BP	GO:0034763	negative regulation of transmembrane transport	2/100	112/16917	0.141992	0.327219	0.248827	THBS1/CAV1	2	Astrocyte
BP	GO:0051261	protein depolymerization	2/100	112/16917	0.141992	0.327219	0.248827	LIMA1/WDR1	2	Astrocyte
BP	GO:0010639	negative regulation of organelle organization	4/100	340/16917	0.142269	0.327219	0.248827	LMNA/LIMA1/IER3/BOK	4	Astrocyte
MF	GO:0061629	RNA polymerase II-specific DNA-binding transcription factor binding	4/100	340/16917	0.142269	0.327219	0.248827	ACTN4/TGFB1I1/ANKRD1/KDM5D	4	Astrocyte
BP	GO:0031400	negative regulation of protein modification process	5/100	467/16917	0.142974	0.328419	0.249739	PMEPA1/CDKN2B/CAV1/GADD45B/IGFBP3	5	Astrocyte
BP	GO:0030282	bone mineralization	2/100	113/16917	0.14402	0.329928	0.250887	PRICKLE1/CCN1	2	Astrocyte
BP	GO:0033673	negative regulation of kinase activity	3/100	222/16917	0.144183	0.329928	0.250887	CDKN2B/CAV1/GADD45B	3	Astrocyte
BP	GO:0051403	stress-activated MAPK cascade	3/100	222/16917	0.144183	0.329928	0.250887	GADD45B/CCN2/TGFB2	3	Astrocyte
BP	GO:0030003	intracellular monoatomic cation homeostasis	5/100	469/16917	0.14479	0.330896	0.251623	CAV2/EDN1/CAV1/FLNA/BOK	5	Astrocyte
CC	GO:0016323	basolateral plasma membrane	3/100	223/16917	0.145558	0.332095	0.252535	PDPN/CD44/MSN	3	Astrocyte
BP	GO:0007006	mitochondrial membrane organization	2/100	114/16917	0.146055	0.332095	0.252535	IER3/BOK	2	Astrocyte
BP	GO:0007088	regulation of mitotic nuclear division	2/100	114/16917	0.146055	0.332095	0.252535	CAV2/EDN1	2	Astrocyte
BP	GO:0098773	skin epidermis development	2/100	114/16917	0.146055	0.332095	0.252535	ELOVL1/TGFB2	2	Astrocyte
BP	GO:0015918	sterol transport	2/100	115/16917	0.148096	0.335884	0.255416	CAV1/LIMA1	2	Astrocyte
BP	GO:1901800	positive regulation of proteasomal protein catabolic process	2/100	115/16917	0.148096	0.335884	0.255416	PRICKLE1/CAV1	2	Astrocyte
BP	GO:0060560	developmental growth involved in morphogenesis	3/100	225/16917	0.148323	0.335975	0.255485	PRICKLE1/EDN1/VCL	3	Astrocyte
BP	GO:0002696	positive regulation of leukocyte activation	4/100	346/16917	0.148768	0.336556	0.255927	LGALS1/THBS1/AXL/CAV1	4	Astrocyte
BP	GO:0009991	response to extracellular stimulus	5/100	475/16917	0.150298	0.339591	0.258235	COL1A1/NQO1/CDKN2B/AXL/RUNX2	5	Astrocyte
BP	GO:1901653	cellular response to peptide	4/100	349/16917	0.15206	0.341298	0.259533	CAV2/GJA1/EDN1/CAV1	4	Astrocyte
MF	GO:0004222	metalloendopeptidase activity	2/100	117/16917	0.152195	0.341298	0.259533	MMP2/ADAM12	2	Astrocyte
BP	GO:0031398	positive regulation of protein ubiquitination	2/100	117/16917	0.152195	0.341298	0.259533	PRICKLE1/CAV1	2	Astrocyte
BP	GO:0032411	positive regulation of transporter activity	2/100	117/16917	0.152195	0.341298	0.259533	EDN1/ACTN4	2	Astrocyte
BP	GO:0033135	regulation of peptidyl-serine phosphorylation	2/100	117/16917	0.152195	0.341298	0.259533	CD44/CAV1	2	Astrocyte
BP	GO:0048675	axon extension	2/100	117/16917	0.152195	0.341298	0.259533	EDN1/VCL	2	Astrocyte
BP	GO:0006873	intracellular monoatomic ion homeostasis	5/100	478/16917	0.153086	0.342867	0.260726	CAV2/EDN1/CAV1/FLNA/BOK	5	Astrocyte
BP	GO:0001704	formation of primary germ layer	2/100	118/16917	0.154253	0.344621	0.26206	MMP2/GJA1	2	Astrocyte
BP	GO:0046660	female sex differentiation	2/100	118/16917	0.154253	0.344621	0.26206	MMP2/AXL	2	Astrocyte
BP	GO:0031098	stress-activated protein kinase signaling cascade	3/100	230/16917	0.15531	0.346549	0.263526	GADD45B/CCN2/TGFB2	3	Astrocyte
BP	GO:0006906	vesicle fusion	2/100	119/16917	0.156317	0.348363	0.264906	CAV2/RAB34	2	Astrocyte
BP	GO:0002443	leukocyte mediated immunity	4/100	354/16917	0.157609	0.350373	0.266434	S100A13/WDR1/ANXA3/KDM5D	4	Astrocyte
MF	GO:0030674	protein-macromolecule adaptor activity	4/100	354/16917	0.157609	0.350373	0.266434	MYH9/CAV2/CAV1/TRIM22	4	Astrocyte
CC	GO:0001669	acrosomal vesicle	2/100	121/16917	0.16046	0.354444	0.26953	CAV2/CAV1	2	Astrocyte
BP	GO:0034219	carbohydrate transmembrane transport	2/100	121/16917	0.16046	0.354444	0.26953	EDN1/SLC2A6	2	Astrocyte
BP	GO:0043244	regulation of protein-containing complex disassembly	2/100	121/16917	0.16046	0.354444	0.26953	LIMA1/WDR1	2	Astrocyte
BP	GO:0090174	organelle membrane fusion	2/100	121/16917	0.16046	0.354444	0.26953	CAV2/RAB34	2	Astrocyte
MF	GO:0140375	immune receptor activity	2/100	121/16917	0.16046	0.354444	0.26953	CD44/IL13RA1	2	Astrocyte
BP	GO:1902532	negative regulation of intracellular signal transduction	5/100	486/16917	0.160626	0.354444	0.26953	THBS1/CD44/CAV1/TGFB2/SH3BP4	5	Astrocyte
CC	GO:0098791	Golgi apparatus subcompartment	4/100	358/16917	0.162103	0.357264	0.271674	TGFBI/RAB34/FLNA/BOK	4	Astrocyte
BP	GO:0045926	negative regulation of growth	3/100	235/16917	0.162398	0.357476	0.271835	GJA1/TGFB2/SH3BP4	3	Astrocyte
BP	GO:0001654	eye development	4/100	360/16917	0.164368	0.361367	0.274794	PRICKLE1/COL4A1/RHOJ/TGFB2	4	Astrocyte
BP	GO:0051347	positive regulation of transferase activity	5/100	492/16917	0.16638	0.36518	0.277694	THBS1/AXL/EDN1/TGFB2/CCN1	5	Astrocyte
MF	GO:1901681	sulfur compound binding	3/100	238/16917	0.166698	0.36518	0.277694	THBS1/FSTL1/CCN2	3	Astrocyte
BP	GO:0007266	Rho protein signal transduction	2/100	124/16917	0.166713	0.36518	0.277694	RHOJ/PDPN	2	Astrocyte
BP	GO:0150063	visual system development	4/100	363/16917	0.167786	0.367083	0.279141	PRICKLE1/COL4A1/RHOJ/TGFB2	4	Astrocyte
BP	GO:0060828	regulation of canonical Wnt signaling pathway	3/100	240/16917	0.169584	0.370565	0.281788	COL1A1/PRICKLE1/CAV1	3	Astrocyte
BP	GO:0009615	response to virus	4/100	365/16917	0.170079	0.371195	0.282268	IFITM3/IFITM2/APOBEC3C/TRIM22	4	Astrocyte
CC	GO:0016363	nuclear matrix	2/100	126/16917	0.170905	0.372543	0.283293	LMNA/TGFB1I1	2	Astrocyte
BP	GO:0006163	purine nucleotide metabolic process	5/100	497/16917	0.171238	0.372816	0.2835	NQO1/ELOVL1/IER3/TP53I3/SLC2A6	5	Astrocyte
MF	GO:0005525	GTP binding	4/100	367/16917	0.172384	0.374397	0.284703	RHOJ/RHOC/RAB34/TUBB6	4	Astrocyte
BP	GO:0009132	nucleoside diphosphate metabolic process	2/100	127/16917	0.173007	0.374397	0.284703	IER3/SLC2A6	2	Astrocyte
BP	GO:0043401	steroid hormone mediated signaling pathway	2/100	127/16917	0.173007	0.374397	0.284703	PMEPA1/KDM5D	2	Astrocyte
BP	GO:0051225	spindle assembly	2/100	127/16917	0.173007	0.374397	0.284703	PRICKLE1/FLNA	2	Astrocyte
BP	GO:0090090	negative regulation of canonical Wnt signaling pathway	2/100	127/16917	0.173007	0.374397	0.284703	PRICKLE1/CAV1	2	Astrocyte
BP	GO:0048880	sensory system development	4/100	368/16917	0.17354	0.375098	0.285236	PRICKLE1/COL4A1/RHOJ/TGFB2	4	Astrocyte
MF	GO:0002020	protease binding	2/100	128/16917	0.175114	0.378045	0.287476	COL1A1/SERPINE1	2	Astrocyte
BP	GO:0007052	mitotic spindle organization	2/100	129/16917	0.177226	0.381684	0.290244	PRICKLE1/FLNA	2	Astrocyte
BP	GO:0050729	positive regulation of inflammatory response	2/100	129/16917	0.177226	0.381684	0.290244	LGALS1/SERPINE1	2	Astrocyte
BP	GO:0032412	regulation of monoatomic ion transmembrane transporter activity	3/100	246/16917	0.178327	0.383596	0.291698	EDN1/CAV1/ACTN4	3	Astrocyte
BP	GO:1900180	regulation of protein localization to nucleus	2/100	130/16917	0.179341	0.384441	0.29234	LMNA/FLNA	2	Astrocyte
BP	GO:2001257	regulation of cation channel activity	2/100	130/16917	0.179341	0.384441	0.29234	EDN1/CAV1	2	Astrocyte
BP	GO:0007159	leukocyte cell-cell adhesion	4/100	373/16917	0.179363	0.384441	0.29234	LGALS1/CD44/CAV1/MSN	4	Astrocyte
CC	GO:0005802	trans-Golgi network	3/100	248/16917	0.181269	0.388009	0.295054	TGFBI/FLNA/BOK	3	Astrocyte
BP	GO:0046328	regulation of JNK cascade	2/100	131/16917	0.18146	0.388009	0.295054	GADD45B/CCN2	2	Astrocyte
BP	GO:0031668	cellular response to extracellular stimulus	3/100	249/16917	0.182746	0.390292	0.29679	COL1A1/CDKN2B/AXL	3	Astrocyte
BP	GO:0008584	male gonad development	2/100	132/16917	0.183583	0.39115	0.297442	TGFB2/BOK	2	Astrocyte
BP	GO:0045727	positive regulation of translation	2/100	132/16917	0.183583	0.39115	0.297442	THBS1/PRR16	2	Astrocyte
BP	GO:1903039	positive regulation of leukocyte cell-cell adhesion	3/100	251/16917	0.185708	0.393811	0.299465	LGALS1/CD44/CAV1	3	Astrocyte
MF	GO:0004866	endopeptidase inhibitor activity	2/100	133/16917	0.18571	0.393811	0.299465	SPOCK1/SERPINE1	2	Astrocyte
BP	GO:0046546	development of primary male sexual characteristics	2/100	133/16917	0.18571	0.393811	0.299465	TGFB2/BOK	2	Astrocyte
BP	GO:0051384	response to glucocorticoid	2/100	133/16917	0.18571	0.393811	0.299465	EDN1/ANXA3	2	Astrocyte
BP	GO:0003018	vascular process in circulatory system	3/100	252/16917	0.187193	0.39602	0.301145	MMP2/EDN1/CAV1	3	Astrocyte
BP	GO:0034976	response to endoplasmic reticulum stress	3/100	252/16917	0.187193	0.39602	0.301145	THBS1/CAV1/BOK	3	Astrocyte
BP	GO:0014065	phosphatidylinositol 3-kinase signaling	2/100	134/16917	0.187841	0.396454	0.301475	EDN1/TGFB2	2	Astrocyte
BP	GO:1903052	positive regulation of proteolysis involved in protein catabolic process	2/100	134/16917	0.187841	0.396454	0.301475	PRICKLE1/CAV1	2	Astrocyte
BP	GO:0030216	keratinocyte differentiation	2/100	135/16917	0.189974	0.399033	0.303437	PALLD/FOSL2	2	Astrocyte
BP	GO:0045834	positive regulation of lipid metabolic process	2/100	135/16917	0.189974	0.399033	0.303437	CCN1/CAPN2	2	Astrocyte
BP	GO:1903322	positive regulation of protein modification by small protein conjugation or removal	2/100	135/16917	0.189974	0.399033	0.303437	PRICKLE1/CAV1	2	Astrocyte
BP	GO:2000377	regulation of reactive oxygen species metabolic process	2/100	135/16917	0.189974	0.399033	0.303437	THBS1/IER3	2	Astrocyte
CC	GO:0009925	basal plasma membrane	3/100	254/16917	0.190175	0.399033	0.303437	PDPN/CD44/MSN	3	Astrocyte
BP	GO:0022898	regulation of transmembrane transporter activity	3/100	256/16917	0.193168	0.404749	0.307783	EDN1/CAV1/ACTN4	3	Astrocyte
CC	GO:0043235	receptor complex	4/100	385/16917	0.193602	0.404749	0.307783	AXL/CD44/FLNA/IL13RA1	4	Astrocyte
BP	GO:0006986	response to unfolded protein	2/100	137/16917	0.194252	0.404749	0.307783	THBS1/BOK	2	Astrocyte
BP	GO:0010508	positive regulation of autophagy	2/100	137/16917	0.194252	0.404749	0.307783	SH3BP4/TRIM22	2	Astrocyte
BP	GO:0051783	regulation of nuclear division	2/100	137/16917	0.194252	0.404749	0.307783	CAV2/EDN1	2	Astrocyte
BP	GO:1903531	negative regulation of secretion by cell	2/100	137/16917	0.194252	0.404749	0.307783	GJA1/EDN1	2	Astrocyte
BP	GO:0002366	leukocyte activation involved in immune response	3/100	257/16917	0.19467	0.405148	0.308086	S100A13/LGALS1/ANXA3	3	Astrocyte
BP	GO:0043254	regulation of protein-containing complex assembly	4/100	387/16917	0.19601	0.406383	0.309026	PMEPA1/FBLIM1/RHOC/MSN	4	Astrocyte
BP	GO:0051348	negative regulation of transferase activity	3/100	258/16917	0.196174	0.406383	0.309026	CDKN2B/CAV1/GADD45B	3	Astrocyte
MF	GO:0008083	growth factor activity	2/100	138/16917	0.196396	0.406383	0.309026	CCN2/TGFB2	2	Astrocyte
BP	GO:0010977	negative regulation of neuron projection development	2/100	138/16917	0.196396	0.406383	0.309026	SPOCK1/FLNA	2	Astrocyte
MF	GO:0099106	ion channel regulator activity	2/100	138/16917	0.196396	0.406383	0.309026	CAV1/FLNA	2	Astrocyte
MF	GO:0019001	guanyl nucleotide binding	4/100	388/16917	0.197217	0.407144	0.309604	RHOJ/RHOC/RAB34/TUBB6	4	Astrocyte
MF	GO:0032561	guanyl ribonucleotide binding	4/100	388/16917	0.197217	0.407144	0.309604	RHOJ/RHOC/RAB34/TUBB6	4	Astrocyte
CC	GO:0005766	primary lysosome	2/100	139/16917	0.198543	0.407535	0.309902	GLIPR1/CAP1	2	Astrocyte
BP	GO:0007292	female gamete generation	2/100	139/16917	0.198543	0.407535	0.309902	MMP2/EDN1	2	Astrocyte
MF	GO:0030414	peptidase inhibitor activity	2/100	139/16917	0.198543	0.407535	0.309902	SPOCK1/SERPINE1	2	Astrocyte
CC	GO:0042582	azurophil granule	2/100	139/16917	0.198543	0.407535	0.309902	GLIPR1/CAP1	2	Astrocyte
BP	GO:0050714	positive regulation of protein secretion	2/100	139/16917	0.198543	0.407535	0.309902	TGFB2/ANKRD1	2	Astrocyte
BP	GO:0007605	sensory perception of sound	2/100	140/16917	0.200692	0.410095	0.311848	COL1A1/WDR1	2	Astrocyte
BP	GO:0030177	positive regulation of Wnt signaling pathway	2/100	140/16917	0.200692	0.410095	0.311848	COL1A1/CAV1	2	Astrocyte
BP	GO:0032434	regulation of proteasomal ubiquitin-dependent protein catabolic process	2/100	140/16917	0.200692	0.410095	0.311848	PRICKLE1/CAV1	2	Astrocyte
BP	GO:0002263	cell activation involved in immune response	3/100	261/16917	0.200704	0.410095	0.311848	S100A13/LGALS1/ANXA3	3	Astrocyte
BP	GO:0001818	negative regulation of cytokine production	3/100	262/16917	0.20222	0.412722	0.313846	THBS1/AXL/TGFB2	3	Astrocyte
BP	GO:0006633	fatty acid biosynthetic process	2/100	141/16917	0.202845	0.413057	0.314101	EDN1/ELOVL1	2	Astrocyte
BP	GO:0007224	smoothened signaling pathway	2/100	141/16917	0.202845	0.413057	0.314101	RUNX2/RAB34	2	Astrocyte
BP	GO:0070372	regulation of ERK1 and ERK2 cascade	3/100	263/16917	0.203738	0.414406	0.315127	CD44/CCN2/CCN1	3	Astrocyte
BP	GO:0001890	placenta development	2/100	142/16917	0.205	0.416029	0.316361	PHLDA2/CCN1	2	Astrocyte
BP	GO:0008064	regulation of actin polymerization or depolymerization	2/100	142/16917	0.205	0.416029	0.316361	LIMA1/WDR1	2	Astrocyte
BP	GO:0008643	carbohydrate transport	2/100	143/16917	0.207158	0.418515	0.318251	EDN1/SLC2A6	2	Astrocyte
MF	GO:0016247	channel regulator activity	2/100	143/16917	0.207158	0.418515	0.318251	CAV1/FLNA	2	Astrocyte
BP	GO:0048754	branching morphogenesis of an epithelial tube	2/100	143/16917	0.207158	0.418515	0.318251	COL4A1/EDN1	2	Astrocyte
BP	GO:0120161	regulation of cold-induced thermogenesis	2/100	143/16917	0.207158	0.418515	0.318251	GJA1/CAV1	2	Astrocyte
BP	GO:0051051	negative regulation of transport	4/100	397/16917	0.208187	0.420121	0.319472	THBS1/GJA1/EDN1/CAV1	4	Astrocyte
CC	GO:0019897	extrinsic component of plasma membrane	2/100	144/16917	0.209318	0.421455	0.320487	CAV2/SYTL2	2	Astrocyte
BP	GO:0106106	cold-induced thermogenesis	2/100	144/16917	0.209318	0.421455	0.320487	GJA1/CAV1	2	Astrocyte
BP	GO:0031331	positive regulation of cellular catabolic process	4/100	399/16917	0.210649	0.423433	0.321991	PRICKLE1/CAV1/SH3BP4/TRIM22	4	Astrocyte
MF	GO:0035091	phosphatidylinositol binding	3/100	268/16917	0.211371	0.423433	0.321991	PHLDA2/TLN1/SYTL2	3	Astrocyte
BP	GO:0030832	regulation of actin filament length	2/100	145/16917	0.211481	0.423433	0.321991	LIMA1/WDR1	2	Astrocyte
CC	GO:0034399	nuclear periphery	2/100	145/16917	0.211481	0.423433	0.321991	LMNA/TGFB1I1	2	Astrocyte
BP	GO:0055088	lipid homeostasis	2/100	145/16917	0.211481	0.423433	0.321991	CAV1/LIMA1	2	Astrocyte
BP	GO:0006869	lipid transport	4/100	400/16917	0.211883	0.423766	0.322244	THBS1/EDN1/CAV1/LIMA1	4	Astrocyte
BP	GO:1903532	positive regulation of secretion by cell	3/100	269/16917	0.212905	0.425336	0.323438	EDN1/TGFB2/ANKRD1	3	Astrocyte
BP	GO:0008037	cell recognition	2/100	146/16917	0.213646	0.425394	0.323482	PALLD/MSN	2	Astrocyte
BP	GO:0046467	membrane lipid biosynthetic process	2/100	146/16917	0.213646	0.425394	0.323482	ELOVL1/CCN1	2	Astrocyte
BP	GO:0051896	regulation of protein kinase B signaling	2/100	146/16917	0.213646	0.425394	0.323482	THBS1/AXL	2	Astrocyte
BP	GO:0015711	organic anion transport	4/100	402/16917	0.214358	0.426339	0.324201	THBS1/GJA1/EDN1/SLC2A6	4	Astrocyte
BP	GO:0043524	negative regulation of neuron apoptotic process	2/100	147/16917	0.215813	0.42781	0.32532	AXL/BOK	2	Astrocyte
BP	GO:0051092	positive regulation of NF-kappaB transcription factor activity	2/100	147/16917	0.215813	0.42781	0.32532	CAV1/TRIM22	2	Astrocyte
MF	GO:0061135	endopeptidase regulator activity	2/100	147/16917	0.215813	0.42781	0.32532	SPOCK1/SERPINE1	2	Astrocyte
BP	GO:0032640	tumor necrosis factor production	2/100	148/16917	0.217982	0.430886	0.327659	THBS1/AXL	2	Astrocyte
BP	GO:0032680	regulation of tumor necrosis factor production	2/100	148/16917	0.217982	0.430886	0.327659	THBS1/AXL	2	Astrocyte
CC	GO:0005769	early endosome	4/100	405/16917	0.218085	0.430886	0.327659	PMEPA1/CAV1/IFITM3/BOK	4	Astrocyte
BP	GO:0032409	regulation of transporter activity	3/100	273/16917	0.219066	0.431922	0.328446	EDN1/CAV1/ACTN4	3	Astrocyte
CC	GO:0005765	lysosomal membrane	4/100	406/16917	0.219332	0.431922	0.328446	IFITM3/GLIPR1/IFITM2/SLC2A6	4	Astrocyte
CC	GO:0098852	lytic vacuole membrane	4/100	406/16917	0.219332	0.431922	0.328446	IFITM3/GLIPR1/IFITM2/SLC2A6	4	Astrocyte
BP	GO:0044262	cellular carbohydrate metabolic process	3/100	274/16917	0.220613	0.433968	0.330002	PHLDA2/IGFBP3/IER3	3	Astrocyte
BP	GO:0016052	carbohydrate catabolic process	2/100	150/16917	0.222326	0.436383	0.331838	IER3/SLC2A6	2	Astrocyte
CC	GO:0031902	late endosome membrane	2/100	150/16917	0.222326	0.436383	0.331838	IFITM3/IFITM2	2	Astrocyte
BP	GO:0030307	positive regulation of cell growth	2/100	151/16917	0.224501	0.439689	0.334353	EDN1/TGFB2	2	Astrocyte
BP	GO:0046661	male sex differentiation	2/100	151/16917	0.224501	0.439689	0.334353	TGFB2/BOK	2	Astrocyte
BP	GO:0071706	tumor necrosis factor superfamily cytokine production	2/100	152/16917	0.226678	0.442985	0.336859	THBS1/AXL	2	Astrocyte
BP	GO:1903555	regulation of tumor necrosis factor superfamily cytokine production	2/100	152/16917	0.226678	0.442985	0.336859	THBS1/AXL	2	Astrocyte
MF	GO:0001228	DNA-binding transcription activator activity, RNA polymerase II-specific	4/100	413/16917	0.228111	0.445301	0.33862	RUNX2/ELK3/FOSL2/ZBED1	4	Astrocyte
BP	GO:0006665	sphingolipid metabolic process	2/100	154/16917	0.231036	0.450031	0.342217	ELOVL1/CCN1	2	Astrocyte
BP	GO:0048284	organelle fusion	2/100	154/16917	0.231036	0.450031	0.342217	CAV2/RAB34	2	Astrocyte
BP	GO:0007409	axonogenesis	4/100	416/16917	0.231902	0.451228	0.343127	PRICKLE1/EDN1/PALLD/VCL	4	Astrocyte
MF	GO:0001216	DNA-binding transcription activator activity	4/100	417/16917	0.233169	0.451827	0.343583	RUNX2/ELK3/FOSL2/ZBED1	4	Astrocyte
BP	GO:0035265	organ growth	2/100	155/16917	0.233217	0.451827	0.343583	EDN1/TGFB2	2	Astrocyte
BP	GO:0051048	negative regulation of secretion	2/100	155/16917	0.233217	0.451827	0.343583	GJA1/EDN1	2	Astrocyte
BP	GO:1990845	adaptive thermogenesis	2/100	155/16917	0.233217	0.451827	0.343583	GJA1/CAV1	2	Astrocyte
BP	GO:0022900	electron transport chain	2/100	156/16917	0.2354	0.455563	0.346424	CHCHD2/LOXL2	2	Astrocyte
BP	GO:0006816	calcium ion transport	4/100	420/16917	0.236981	0.458129	0.348375	EDN1/CAV1/CCN2/FLNA	4	Astrocyte
BP	GO:0007204	positive regulation of cytosolic calcium ion concentration	2/100	157/16917	0.237584	0.4588	0.348885	EDN1/CAV1	2	Astrocyte
MF	GO:0008234	cysteine-type peptidase activity	2/100	158/16917	0.239768	0.462024	0.351337	USP9Y/CAPN2	2	Astrocyte
BP	GO:0015718	monocarboxylic acid transport	2/100	158/16917	0.239768	0.462024	0.351337	THBS1/EDN1	2	Astrocyte
BP	GO:0035966	response to topologically incorrect protein	2/100	159/16917	0.241954	0.465736	0.35416	THBS1/BOK	2	Astrocyte
BP	GO:0071375	cellular response to peptide hormone stimulus	3/100	288/16917	0.242484	0.466255	0.354554	CAV2/EDN1/CAV1	3	Astrocyte
BP	GO:0030178	negative regulation of Wnt signaling pathway	2/100	160/16917	0.244141	0.468438	0.356214	PRICKLE1/CAV1	2	Astrocyte
BP	GO:0046890	regulation of lipid biosynthetic process	2/100	160/16917	0.244141	0.468438	0.356214	CCN1/CAPN2	2	Astrocyte
BP	GO:1903131	mononuclear cell differentiation	4/100	426/16917	0.24465	0.468912	0.356574	MYH9/LGALS1/AXL/RUNX2	4	Astrocyte
BP	GO:0000280	nuclear division	4/100	427/16917	0.245933	0.470869	0.358063	PRICKLE1/CAV2/EDN1/FLNA	4	Astrocyte
BP	GO:0048511	rhythmic process	3/100	291/16917	0.247219	0.472826	0.359551	MMP2/AXL/TGFB2	3	Astrocyte
CC	GO:0005775	vacuolar lumen	2/100	162/16917	0.248518	0.473292	0.359905	SDC2/CAP1	2	Astrocyte
BP	GO:0007254	JNK cascade	2/100	162/16917	0.248518	0.473292	0.359905	GADD45B/CCN2	2	Astrocyte
BP	GO:0048015	phosphatidylinositol-mediated signaling	2/100	162/16917	0.248518	0.473292	0.359905	EDN1/TGFB2	2	Astrocyte
BP	GO:0050954	sensory perception of mechanical stimulus	2/100	162/16917	0.248518	0.473292	0.359905	COL1A1/WDR1	2	Astrocyte
MF	GO:0031625	ubiquitin protein ligase binding	3/100	293/16917	0.250384	0.475836	0.36184	VCL/PDLIM2/BOK	3	Astrocyte
MF	GO:0046982	protein heterodimerization activity	3/100	293/16917	0.250384	0.475836	0.36184	CAV2/CAV1/BOK	3	Astrocyte
MF	GO:0005125	cytokine activity	2/100	164/16917	0.252897	0.480103	0.365084	EDN1/TGFB2	2	Astrocyte
BP	GO:0051047	positive regulation of secretion	3/100	295/16917	0.253555	0.480844	0.365648	EDN1/TGFB2/ANKRD1	3	Astrocyte
BP	GO:0051222	positive regulation of protein transport	3/100	296/16917	0.255143	0.48122	0.365934	TGFB2/FLNA/ANKRD1	3	Astrocyte
BP	GO:0034765	regulation of monoatomic ion transmembrane transport	4/100	435/16917	0.256258	0.48122	0.365934	EDN1/CAV1/ACTN4/FLNA	4	Astrocyte
BP	GO:0003197	endocardial cushion development	1/100	50/16917	0.256859	0.48122	0.365934	TGFB2	1	Astrocyte
BP	GO:0019083	viral transcription	1/100	50/16917	0.256859	0.48122	0.365934	IFITM3	1	Astrocyte
BP	GO:0033344	cholesterol efflux	1/100	50/16917	0.256859	0.48122	0.365934	CAV1	1	Astrocyte
BP	GO:0044818	mitotic G2/M transition checkpoint	1/100	50/16917	0.256859	0.48122	0.365934	IER3	1	Astrocyte
BP	GO:0051180	vitamin transport	1/100	50/16917	0.256859	0.48122	0.365934	SLC2A6	1	Astrocyte
BP	GO:0055021	regulation of cardiac muscle tissue growth	1/100	50/16917	0.256859	0.48122	0.365934	EDN1	1	Astrocyte
BP	GO:0070169	positive regulation of biomineral tissue development	1/100	50/16917	0.256859	0.48122	0.365934	CCN1	1	Astrocyte
BP	GO:2000649	regulation of sodium ion transmembrane transporter activity	1/100	50/16917	0.256859	0.48122	0.365934	ACTN4	1	Astrocyte
CC	GO:0030426	growth cone	2/100	166/16917	0.257278	0.48122	0.365934	PALLD/FLNA	2	Astrocyte
BP	GO:0048017	inositol lipid-mediated signaling	2/100	166/16917	0.257278	0.48122	0.365934	EDN1/TGFB2	2	Astrocyte
BP	GO:1901136	carbohydrate derivative catabolic process	2/100	166/16917	0.257278	0.48122	0.365934	CD44/APOBEC3C	2	Astrocyte
BP	GO:0072594	establishment of protein localization to organelle	4/100	436/16917	0.257555	0.48122	0.365934	PRICKLE1/LMNA/TRAM2/FLNA	4	Astrocyte
BP	GO:0002279	mast cell activation involved in immune response	1/100	51/16917	0.261265	0.48122	0.365934	S100A13	1	Astrocyte
MF	GO:0003743	translation initiation factor activity	1/100	51/16917	0.261265	0.48122	0.365934	EIF1AY	1	Astrocyte
BP	GO:0006584	catecholamine metabolic process	1/100	51/16917	0.261265	0.48122	0.365934	TGFB2	1	Astrocyte
BP	GO:0009712	catechol-containing compound metabolic process	1/100	51/16917	0.261265	0.48122	0.365934	TGFB2	1	Astrocyte
BP	GO:0010518	positive regulation of phospholipase activity	1/100	51/16917	0.261265	0.48122	0.365934	CCN1	1	Astrocyte
BP	GO:0010596	negative regulation of endothelial cell migration	1/100	51/16917	0.261265	0.48122	0.365934	THBS1	1	Astrocyte
BP	GO:0038066	p38MAPK cascade	1/100	51/16917	0.261265	0.48122	0.365934	GADD45B	1	Astrocyte
BP	GO:0043113	receptor clustering	1/100	51/16917	0.261265	0.48122	0.365934	FLNA	1	Astrocyte
BP	GO:0048013	ephrin receptor signaling pathway	1/100	51/16917	0.261265	0.48122	0.365934	MMP2	1	Astrocyte
BP	GO:0048146	positive regulation of fibroblast proliferation	1/100	51/16917	0.261265	0.48122	0.365934	FOSL2	1	Astrocyte
MF	GO:0050661	NADP binding	1/100	51/16917	0.261265	0.48122	0.365934	TP53I3	1	Astrocyte
BP	GO:0050829	defense response to Gram-negative bacterium	1/100	51/16917	0.261265	0.48122	0.365934	SERPINE1	1	Astrocyte
BP	GO:0071385	cellular response to glucocorticoid stimulus	1/100	51/16917	0.261265	0.48122	0.365934	EDN1	1	Astrocyte
BP	GO:1902895	positive regulation of miRNA transcription	1/100	51/16917	0.261265	0.48122	0.365934	TGFB2	1	Astrocyte
BP	GO:0001764	neuron migration	2/100	169/16917	0.263853	0.483473	0.367647	SPOCK1/AXL	2	Astrocyte
BP	GO:0051251	positive regulation of lymphocyte activation	3/100	302/16917	0.264701	0.483473	0.367647	LGALS1/AXL/CAV1	3	Astrocyte
BP	GO:0002448	mast cell mediated immunity	1/100	52/16917	0.265645	0.483473	0.367647	S100A13	1	Astrocyte
BP	GO:0009116	nucleoside metabolic process	1/100	52/16917	0.265645	0.483473	0.367647	APOBEC3C	1	Astrocyte
CC	GO:0032420	stereocilium	1/100	52/16917	0.265645	0.483473	0.367647	RHOC	1	Astrocyte
BP	GO:0039531	regulation of viral-induced cytoplasmic pattern recognition receptor signaling pathway	1/100	52/16917	0.265645	0.483473	0.367647	CAV1	1	Astrocyte
BP	GO:0048010	vascular endothelial growth factor receptor signaling pathway	1/100	52/16917	0.265645	0.483473	0.367647	AXL	1	Astrocyte
BP	GO:0048662	negative regulation of smooth muscle cell proliferation	1/100	52/16917	0.265645	0.483473	0.367647	IGFBP3	1	Astrocyte
BP	GO:0055078	sodium ion homeostasis	1/100	52/16917	0.265645	0.483473	0.367647	EDN1	1	Astrocyte
BP	GO:0060986	endocrine hormone secretion	1/100	52/16917	0.265645	0.483473	0.367647	GJA1	1	Astrocyte
BP	GO:1904036	negative regulation of epithelial cell apoptotic process	1/100	52/16917	0.265645	0.483473	0.367647	SERPINE1	1	Astrocyte
BP	GO:1901991	negative regulation of mitotic cell cycle phase transition	2/100	170/16917	0.266045	0.483473	0.367647	CDKN2B/IER3	2	Astrocyte
BP	GO:0031647	regulation of protein stability	3/100	304/16917	0.267897	0.483473	0.367647	LMNA/PARVA/FLNA	3	Astrocyte
BP	GO:0019722	calcium-mediated signaling	2/100	171/16917	0.268237	0.483473	0.367647	EDN1/LMCD1	2	Astrocyte
CC	GO:0030427	site of polarized growth	2/100	171/16917	0.268237	0.483473	0.367647	PALLD/FLNA	2	Astrocyte
BP	GO:0061025	membrane fusion	2/100	171/16917	0.268237	0.483473	0.367647	CAV2/RAB34	2	Astrocyte
BP	GO:2000058	regulation of ubiquitin-dependent protein catabolic process	2/100	171/16917	0.268237	0.483473	0.367647	PRICKLE1/CAV1	2	Astrocyte
BP	GO:0031667	response to nutrient levels	4/100	445/16917	0.269289	0.483473	0.367647	COL1A1/NQO1/CDKN2B/RUNX2	4	Astrocyte
BP	GO:2001020	regulation of response to DNA damage stimulus	3/100	305/16917	0.269497	0.483473	0.367647	CD44/IER3/ANKRD1	3	Astrocyte
BP	GO:0009994	oocyte differentiation	1/100	53/16917	0.269999	0.483473	0.367647	EDN1	1	Astrocyte
CC	GO:0016459	myosin complex	1/100	53/16917	0.269999	0.483473	0.367647	MYH9	1	Astrocyte
BP	GO:0032007	negative regulation of TOR signaling	1/100	53/16917	0.269999	0.483473	0.367647	SH3BP4	1	Astrocyte
BP	GO:0043030	regulation of macrophage activation	1/100	53/16917	0.269999	0.483473	0.367647	THBS1	1	Astrocyte
BP	GO:0045599	negative regulation of fat cell differentiation	1/100	53/16917	0.269999	0.483473	0.367647	TGFB1I1	1	Astrocyte
BP	GO:0050732	negative regulation of peptidyl-tyrosine phosphorylation	1/100	53/16917	0.269999	0.483473	0.367647	CAV1	1	Astrocyte
BP	GO:0060071	Wnt signaling pathway, planar cell polarity pathway	1/100	53/16917	0.269999	0.483473	0.367647	PRICKLE1	1	Astrocyte
BP	GO:0009749	response to glucose	2/100	172/16917	0.27043	0.483473	0.367647	THBS1/CCN2	2	Astrocyte
BP	GO:0061138	morphogenesis of a branching epithelium	2/100	172/16917	0.27043	0.483473	0.367647	COL4A1/EDN1	2	Astrocyte
BP	GO:0010876	lipid localization	4/100	447/16917	0.27191	0.483473	0.367647	THBS1/EDN1/CAV1/LIMA1	4	Astrocyte
BP	GO:0001659	temperature homeostasis	2/100	173/16917	0.272622	0.483473	0.367647	GJA1/CAV1	2	Astrocyte
BP	GO:0002700	regulation of production of molecular mediator of immune response	2/100	173/16917	0.272622	0.483473	0.367647	AXL/TGFB2	2	Astrocyte
BP	GO:0008217	regulation of blood pressure	2/100	173/16917	0.272622	0.483473	0.367647	EDN1/IER3	2	Astrocyte
CC	GO:0005774	vacuolar membrane	4/100	448/16917	0.273222	0.483473	0.367647	IFITM3/GLIPR1/IFITM2/SLC2A6	4	Astrocyte
BP	GO:0001954	positive regulation of cell-matrix adhesion	1/100	54/16917	0.274328	0.483473	0.367647	LIMS1	1	Astrocyte
BP	GO:0003229	ventricular cardiac muscle tissue development	1/100	54/16917	0.274328	0.483473	0.367647	TGFB2	1	Astrocyte
BP	GO:0006383	transcription by RNA polymerase III	1/100	54/16917	0.274328	0.483473	0.367647	POLR2L	1	Astrocyte
CC	GO:0035580	specific granule lumen	1/100	54/16917	0.274328	0.483473	0.367647	VCL	1	Astrocyte
BP	GO:0042733	embryonic digit morphogenesis	1/100	54/16917	0.274328	0.483473	0.367647	PRICKLE1	1	Astrocyte
BP	GO:0061462	protein localization to lysosome	1/100	54/16917	0.274328	0.483473	0.367647	SH3BP4	1	Astrocyte
BP	GO:0022407	regulation of cell-cell adhesion	4/100	449/16917	0.274536	0.483473	0.367647	LGALS1/PDPN/CD44/CAV1	4	Astrocyte
BP	GO:0000910	cytokinesis	2/100	174/16917	0.274813	0.483473	0.367647	MYH9/RHOC	2	Astrocyte
BP	GO:0009755	hormone-mediated signaling pathway	2/100	174/16917	0.274813	0.483473	0.367647	PMEPA1/KDM5D	2	Astrocyte
BP	GO:0072001	renal system development	3/100	309/16917	0.275908	0.483473	0.367647	PRICKLE1/COL4A1/TGFB2	3	Astrocyte
BP	GO:0043491	protein kinase B signaling	2/100	175/16917	0.277005	0.483473	0.367647	THBS1/AXL	2	Astrocyte
BP	GO:1903829	positive regulation of protein localization	4/100	451/16917	0.277166	0.483473	0.367647	TGFB2/FLNA/MSN/ANKRD1	4	Astrocyte
BP	GO:0001541	ovarian follicle development	1/100	55/16917	0.278631	0.483473	0.367647	MMP2	1	Astrocyte
BP	GO:0001706	endoderm formation	1/100	55/16917	0.278631	0.483473	0.367647	MMP2	1	Astrocyte
BP	GO:0008347	glial cell migration	1/100	55/16917	0.278631	0.483473	0.367647	TGFB2	1	Astrocyte
BP	GO:0031060	regulation of histone methylation	1/100	55/16917	0.278631	0.483473	0.367647	LMNA	1	Astrocyte
BP	GO:0031279	regulation of cyclase activity	1/100	55/16917	0.278631	0.483473	0.367647	CAP1	1	Astrocyte
CC	GO:0031526	brush border membrane	1/100	55/16917	0.278631	0.483473	0.367647	LIMA1	1	Astrocyte
BP	GO:0033866	nucleoside bisphosphate biosynthetic process	1/100	55/16917	0.278631	0.483473	0.367647	ELOVL1	1	Astrocyte
BP	GO:0034030	ribonucleoside bisphosphate biosynthetic process	1/100	55/16917	0.278631	0.483473	0.367647	ELOVL1	1	Astrocyte
BP	GO:0034033	purine nucleoside bisphosphate biosynthetic process	1/100	55/16917	0.278631	0.483473	0.367647	ELOVL1	1	Astrocyte
BP	GO:0043407	negative regulation of MAP kinase activity	1/100	55/16917	0.278631	0.483473	0.367647	CAV1	1	Astrocyte
BP	GO:0051058	negative regulation of small GTPase mediated signal transduction	1/100	55/16917	0.278631	0.483473	0.367647	TGFB2	1	Astrocyte
BP	GO:0051785	positive regulation of nuclear division	1/100	55/16917	0.278631	0.483473	0.367647	EDN1	1	Astrocyte
BP	GO:0072132	mesenchyme morphogenesis	1/100	55/16917	0.278631	0.483473	0.367647	TGFB2	1	Astrocyte
BP	GO:1901016	regulation of potassium ion transmembrane transporter activity	1/100	55/16917	0.278631	0.483473	0.367647	CAV1	1	Astrocyte
MF	GO:0044389	ubiquitin-like protein ligase binding	3/100	311/16917	0.27912	0.483473	0.367647	VCL/PDLIM2/BOK	3	Astrocyte
BP	GO:0016482	cytosolic transport	2/100	176/16917	0.279196	0.483473	0.367647	FLNA/MSN	2	Astrocyte
MF	GO:1901981	phosphatidylinositol phosphate binding	2/100	176/16917	0.279196	0.483473	0.367647	PHLDA2/SYTL2	2	Astrocyte
BP	GO:1904951	positive regulation of establishment of protein localization	3/100	312/16917	0.280727	0.483831	0.36792	TGFB2/FLNA/ANKRD1	3	Astrocyte
BP	GO:0009746	response to hexose	2/100	177/16917	0.281387	0.483831	0.36792	THBS1/CCN2	2	Astrocyte
BP	GO:0071902	positive regulation of protein serine/threonine kinase activity	2/100	177/16917	0.281387	0.483831	0.36792	THBS1/EDN1	2	Astrocyte
CC	GO:0098802	plasma membrane signaling receptor complex	2/100	177/16917	0.281387	0.483831	0.36792	FLNA/IL13RA1	2	Astrocyte
BP	GO:0001755	neural crest cell migration	1/100	56/16917	0.282909	0.483831	0.36792	EDN1	1	Astrocyte
CC	GO:0030660	Golgi-associated vesicle membrane	1/100	56/16917	0.282909	0.483831	0.36792	GJA1	1	Astrocyte
BP	GO:0032720	negative regulation of tumor necrosis factor production	1/100	56/16917	0.282909	0.483831	0.36792	AXL	1	Astrocyte
CC	GO:0035577	azurophil granule membrane	1/100	56/16917	0.282909	0.483831	0.36792	GLIPR1	1	Astrocyte
BP	GO:0042306	regulation of protein import into nucleus	1/100	56/16917	0.282909	0.483831	0.36792	FLNA	1	Astrocyte
BP	GO:0043506	regulation of JUN kinase activity	1/100	56/16917	0.282909	0.483831	0.36792	EDN1	1	Astrocyte
BP	GO:0060420	regulation of heart growth	1/100	56/16917	0.282909	0.483831	0.36792	EDN1	1	Astrocyte
BP	GO:0065002	intracellular protein transmembrane transport	1/100	56/16917	0.282909	0.483831	0.36792	TRAM2	1	Astrocyte
BP	GO:1903053	regulation of extracellular matrix organization	1/100	56/16917	0.282909	0.483831	0.36792	PDPN	1	Astrocyte
BP	GO:0019216	regulation of lipid metabolic process	3/100	315/16917	0.285555	0.486467	0.369924	CAV1/CCN1/CAPN2	3	Astrocyte
BP	GO:0030111	regulation of Wnt signaling pathway	3/100	315/16917	0.285555	0.486467	0.369924	COL1A1/PRICKLE1/CAV1	3	Astrocyte
BP	GO:0006893	Golgi to plasma membrane transport	1/100	57/16917	0.287162	0.486467	0.369924	RAB34	1	Astrocyte
BP	GO:0006998	nuclear envelope organization	1/100	57/16917	0.287162	0.486467	0.369924	LMNA	1	Astrocyte
MF	GO:0032934	sterol binding	1/100	57/16917	0.287162	0.486467	0.369924	CAV1	1	Astrocyte
BP	GO:0033619	membrane protein proteolysis	1/100	57/16917	0.287162	0.486467	0.369924	MYH9	1	Astrocyte
BP	GO:0034332	adherens junction organization	1/100	57/16917	0.287162	0.486467	0.369924	VCL	1	Astrocyte
BP	GO:0051339	regulation of lyase activity	1/100	57/16917	0.287162	0.486467	0.369924	CAP1	1	Astrocyte
BP	GO:0090175	regulation of establishment of planar polarity	1/100	57/16917	0.287162	0.486467	0.369924	PRICKLE1	1	Astrocyte
BP	GO:2000630	positive regulation of miRNA metabolic process	1/100	57/16917	0.287162	0.486467	0.369924	TGFB2	1	Astrocyte
BP	GO:0045787	positive regulation of cell cycle	3/100	317/16917	0.288777	0.488741	0.371653	EDN1/CCN2/TGFB2	3	Astrocyte
BP	GO:0032371	regulation of sterol transport	1/100	58/16917	0.29139	0.489201	0.372003	CAV1	1	Astrocyte
BP	GO:0032374	regulation of cholesterol transport	1/100	58/16917	0.29139	0.489201	0.372003	CAV1	1	Astrocyte
BP	GO:0032757	positive regulation of interleukin-8 production	1/100	58/16917	0.29139	0.489201	0.372003	SERPINE1	1	Astrocyte
BP	GO:0046824	positive regulation of nucleocytoplasmic transport	1/100	58/16917	0.29139	0.489201	0.372003	FLNA	1	Astrocyte
BP	GO:0051353	positive regulation of oxidoreductase activity	1/100	58/16917	0.29139	0.489201	0.372003	EDN1	1	Astrocyte
BP	GO:0071715	icosanoid transport	1/100	58/16917	0.29139	0.489201	0.372003	EDN1	1	Astrocyte
BP	GO:0090497	mesenchymal cell migration	1/100	58/16917	0.29139	0.489201	0.372003	EDN1	1	Astrocyte
BP	GO:1903556	negative regulation of tumor necrosis factor superfamily cytokine production	1/100	58/16917	0.29139	0.489201	0.372003	AXL	1	Astrocyte
BP	GO:0070374	positive regulation of ERK1 and ERK2 cascade	2/100	182/16917	0.292334	0.489201	0.372003	CD44/CCN2	2	Astrocyte
BP	GO:0009895	negative regulation of catabolic process	3/100	320/16917	0.293616	0.489201	0.372003	NQO1/IER3/FLNA	3	Astrocyte
BP	GO:0006839	mitochondrial transport	2/100	183/16917	0.294521	0.489201	0.372003	IER3/BOK	2	Astrocyte
BP	GO:0031345	negative regulation of cell projection organization	2/100	183/16917	0.294521	0.489201	0.372003	SPOCK1/FLNA	2	Astrocyte
CC	GO:0000502	proteasome complex	1/100	59/16917	0.295593	0.489201	0.372003	PRICKLE1	1	Astrocyte
BP	GO:0015800	acidic amino acid transport	1/100	59/16917	0.295593	0.489201	0.372003	GJA1	1	Astrocyte
CC	GO:0032421	stereocilium bundle	1/100	59/16917	0.295593	0.489201	0.372003	RHOC	1	Astrocyte
BP	GO:0032615	interleukin-12 production	1/100	59/16917	0.295593	0.489201	0.372003	THBS1	1	Astrocyte
BP	GO:0032655	regulation of interleukin-12 production	1/100	59/16917	0.295593	0.489201	0.372003	THBS1	1	Astrocyte
BP	GO:0038034	signal transduction in absence of ligand	1/100	59/16917	0.295593	0.489201	0.372003	BOK	1	Astrocyte
BP	GO:0050922	negative regulation of chemotaxis	1/100	59/16917	0.295593	0.489201	0.372003	THBS1	1	Astrocyte
BP	GO:0051149	positive regulation of muscle cell differentiation	1/100	59/16917	0.295593	0.489201	0.372003	EDN1	1	Astrocyte
BP	GO:0072678	T cell migration	1/100	59/16917	0.295593	0.489201	0.372003	MSN	1	Astrocyte
BP	GO:0097192	extrinsic apoptotic signaling pathway in absence of ligand	1/100	59/16917	0.295593	0.489201	0.372003	BOK	1	Astrocyte
BP	GO:1902305	regulation of sodium ion transmembrane transport	1/100	59/16917	0.295593	0.489201	0.372003	ACTN4	1	Astrocyte
BP	GO:2000401	regulation of lymphocyte migration	1/100	59/16917	0.295593	0.489201	0.372003	MSN	1	Astrocyte
BP	GO:0008154	actin polymerization or depolymerization	2/100	184/16917	0.296707	0.489468	0.372206	LIMA1/WDR1	2	Astrocyte
BP	GO:0030324	lung development	2/100	184/16917	0.296707	0.489468	0.372206	PDPN/CCN2	2	Astrocyte
BP	GO:0031334	positive regulation of protein-containing complex assembly	2/100	184/16917	0.296707	0.489468	0.372206	RHOC/MSN	2	Astrocyte
BP	GO:0032386	regulation of intracellular transport	3/100	322/16917	0.296846	0.489468	0.372206	IER3/FLNA/MSN	3	Astrocyte
MF	GO:0004714	transmembrane receptor protein tyrosine kinase activity	1/100	60/16917	0.299772	0.490767	0.373194	AXL	1	Astrocyte
BP	GO:0010972	negative regulation of G2/M transition of mitotic cell cycle	1/100	60/16917	0.299772	0.490767	0.373194	IER3	1	Astrocyte
CC	GO:0015030	Cajal body	1/100	60/16917	0.299772	0.490767	0.373194	TRIM22	1	Astrocyte
BP	GO:1905330	regulation of morphogenesis of an epithelium	1/100	60/16917	0.299772	0.490767	0.373194	GJA1	1	Astrocyte
BP	GO:2000241	regulation of reproductive process	2/100	186/16917	0.301077	0.490767	0.373194	MYH9/GJA1	2	Astrocyte
BP	GO:0007265	Ras protein signal transduction	3/100	325/16917	0.301694	0.490767	0.373194	RHOJ/PDPN/TGFB2	3	Astrocyte
BP	GO:0046942	carboxylic acid transport	3/100	325/16917	0.301694	0.490767	0.373194	THBS1/GJA1/EDN1	3	Astrocyte
BP	GO:0001763	morphogenesis of a branching structure	2/100	187/16917	0.30326	0.490767	0.373194	COL4A1/EDN1	2	Astrocyte
BP	GO:0002520	immune system development	2/100	187/16917	0.30326	0.490767	0.373194	CDKN2B/PDPN	2	Astrocyte
BP	GO:0120032	regulation of plasma membrane bounded cell projection assembly	2/100	187/16917	0.30326	0.490767	0.373194	CAV1/CDC42EP1	2	Astrocyte
BP	GO:0015849	organic acid transport	3/100	326/16917	0.303311	0.490767	0.373194	THBS1/GJA1/EDN1	3	Astrocyte
BP	GO:0001655	urogenital system development	1/100	61/16917	0.303926	0.490767	0.373194	MMP2	1	Astrocyte
BP	GO:0010517	regulation of phospholipase activity	1/100	61/16917	0.303926	0.490767	0.373194	CCN1	1	Astrocyte
BP	GO:0015909	long-chain fatty acid transport	1/100	61/16917	0.303926	0.490767	0.373194	THBS1	1	Astrocyte
BP	GO:0034605	cellular response to heat	1/100	61/16917	0.303926	0.490767	0.373194	THBS1	1	Astrocyte
MF	GO:0048306	calcium-dependent protein binding	1/100	61/16917	0.303926	0.490767	0.373194	ANXA3	1	Astrocyte
BP	GO:0061951	establishment of protein localization to plasma membrane	1/100	61/16917	0.303926	0.490767	0.373194	RAB34	1	Astrocyte
BP	GO:0070059	intrinsic apoptotic signaling pathway in response to endoplasmic reticulum stress	1/100	61/16917	0.303926	0.490767	0.373194	BOK	1	Astrocyte
BP	GO:0071300	cellular response to retinoic acid	1/100	61/16917	0.303926	0.490767	0.373194	COL1A1	1	Astrocyte
BP	GO:0071384	cellular response to corticosteroid stimulus	1/100	61/16917	0.303926	0.490767	0.373194	EDN1	1	Astrocyte
BP	GO:0071677	positive regulation of mononuclear cell migration	1/100	61/16917	0.303926	0.490767	0.373194	SERPINE1	1	Astrocyte
BP	GO:0140115	export across plasma membrane	1/100	61/16917	0.303926	0.490767	0.373194	GJA1	1	Astrocyte
BP	GO:2001259	positive regulation of cation channel activity	1/100	61/16917	0.303926	0.490767	0.373194	EDN1	1	Astrocyte
BP	GO:0071214	cellular response to abiotic stimulus	3/100	327/16917	0.304929	0.490985	0.37336	MMP2/COL1A1/ANKRD1	3	Astrocyte
BP	GO:0104004	cellular response to environmental stimulus	3/100	327/16917	0.304929	0.490985	0.37336	MMP2/COL1A1/ANKRD1	3	Astrocyte
BP	GO:0030323	respiratory tube development	2/100	188/16917	0.305442	0.490985	0.37336	PDPN/CCN2	2	Astrocyte
BP	GO:0071897	DNA biosynthetic process	2/100	188/16917	0.305442	0.490985	0.37336	CCN2/ANKRD1	2	Astrocyte
CC	GO:0005635	nuclear envelope	4/100	473/16917	0.306354	0.490985	0.37336	PRICKLE1/LMNA/BOK/ZBED1	4	Astrocyte
BP	GO:0007346	regulation of mitotic cell cycle	4/100	473/16917	0.306354	0.490985	0.37336	CAV2/CDKN2B/EDN1/IER3	4	Astrocyte
BP	GO:0048285	organelle fission	4/100	473/16917	0.306354	0.490985	0.37336	PRICKLE1/CAV2/EDN1/FLNA	4	Astrocyte
BP	GO:0043087	regulation of GTPase activity	3/100	328/16917	0.306547	0.490985	0.37336	CAV2/LIMS1/SH3BP4	3	Astrocyte
MF	GO:0008237	metallopeptidase activity	2/100	189/16917	0.307623	0.490985	0.37336	MMP2/ADAM12	2	Astrocyte
BP	GO:0060491	regulation of cell projection assembly	2/100	189/16917	0.307623	0.490985	0.37336	CAV1/CDC42EP1	2	Astrocyte
BP	GO:0071248	cellular response to metal ion	2/100	189/16917	0.307623	0.490985	0.37336	NQO1/EDN1	2	Astrocyte
CC	GO:0005667	transcription regulator complex	4/100	474/16917	0.30769	0.490985	0.37336	PDLIM1/RUNX2/FOSL2/ANKRD1	4	Astrocyte
BP	GO:0051205	protein insertion into membrane	1/100	62/16917	0.308055	0.490985	0.37336	TRAM2	1	Astrocyte
BP	GO:1902750	negative regulation of cell cycle G2/M phase transition	1/100	62/16917	0.308055	0.490985	0.37336	IER3	1	Astrocyte
CC	GO:0009897	external side of plasma membrane	3/100	329/16917	0.308166	0.490985	0.37336	THBS1/IL13RA1/CAPN2	3	Astrocyte
BP	GO:0007264	small GTPase mediated signal transduction	4/100	475/16917	0.309027	0.49192	0.37407	RHOJ/PDPN/RHOC/TGFB2	4	Astrocyte
BP	GO:0032388	positive regulation of intracellular transport	2/100	190/16917	0.309803	0.492282	0.374346	FLNA/MSN	2	Astrocyte
BP	GO:0061136	regulation of proteasomal protein catabolic process	2/100	190/16917	0.309803	0.492282	0.374346	PRICKLE1/CAV1	2	Astrocyte
BP	GO:0021885	forebrain cell migration	1/100	63/16917	0.31216	0.493841	0.375531	AXL	1	Astrocyte
BP	GO:0042509	regulation of tyrosine phosphorylation of STAT protein	1/100	63/16917	0.31216	0.493841	0.375531	CAV1	1	Astrocyte
CC	GO:0044304	main axon	1/100	63/16917	0.31216	0.493841	0.375531	SPOCK1	1	Astrocyte
BP	GO:0045576	mast cell activation	1/100	63/16917	0.31216	0.493841	0.375531	S100A13	1	Astrocyte
BP	GO:2000379	positive regulation of reactive oxygen species metabolic process	1/100	63/16917	0.31216	0.493841	0.375531	THBS1	1	Astrocyte
BP	GO:0009988	cell-cell recognition	1/100	64/16917	0.316242	0.496793	0.377776	MSN	1	Astrocyte
BP	GO:0010633	negative regulation of epithelial cell migration	1/100	64/16917	0.316242	0.496793	0.377776	THBS1	1	Astrocyte
BP	GO:0017156	calcium-ion regulated exocytosis	1/100	64/16917	0.316242	0.496793	0.377776	MYH9	1	Astrocyte
BP	GO:0032413	negative regulation of ion transmembrane transporter activity	1/100	64/16917	0.316242	0.496793	0.377776	CAV1	1	Astrocyte
BP	GO:0032507	maintenance of protein location in cell	1/100	64/16917	0.316242	0.496793	0.377776	CAV1	1	Astrocyte
BP	GO:0032732	positive regulation of interleukin-1 production	1/100	64/16917	0.316242	0.496793	0.377776	S100A13	1	Astrocyte
BP	GO:0048814	regulation of dendrite morphogenesis	1/100	64/16917	0.316242	0.496793	0.377776	SDC2	1	Astrocyte
CC	GO:0060076	excitatory synapse	1/100	64/16917	0.316242	0.496793	0.377776	PALLD	1	Astrocyte
BP	GO:0010506	regulation of autophagy	3/100	335/16917	0.317884	0.4985	0.379074	SH3BP4/BOK/TRIM22	3	Astrocyte
BP	GO:1990778	protein localization to cell periphery	3/100	335/16917	0.317884	0.4985	0.379074	CAV1/RAB34/FLNA	3	Astrocyte
BP	GO:0016925	protein sumoylation	1/100	65/16917	0.320299	0.500263	0.380414	ZBED1	1	Astrocyte
MF	GO:0019843	rRNA binding	1/100	65/16917	0.320299	0.500263	0.380414	CAVIN1	1	Astrocyte
BP	GO:0070098	chemokine-mediated signaling pathway	1/100	65/16917	0.320299	0.500263	0.380414	EDN1	1	Astrocyte
BP	GO:0042180	cellular ketone metabolic process	2/100	195/16917	0.320681	0.500263	0.380414	NQO1/CAV1	2	Astrocyte
BP	GO:0043393	regulation of protein binding	2/100	195/16917	0.320681	0.500263	0.380414	CAV1/PHLDA2	2	Astrocyte
BP	GO:0050679	positive regulation of epithelial cell proliferation	2/100	195/16917	0.320681	0.500263	0.380414	CAV2/RUNX2	2	Astrocyte
BP	GO:0000070	mitotic sister chromatid segregation	2/100	196/16917	0.322852	0.501505	0.381359	PRICKLE1/FLNA	2	Astrocyte
BP	GO:0009913	epidermal cell differentiation	2/100	196/16917	0.322852	0.501505	0.381359	PALLD/FOSL2	2	Astrocyte
BP	GO:0071805	potassium ion transmembrane transport	2/100	196/16917	0.322852	0.501505	0.381359	CAV1/FLNA	2	Astrocyte
BP	GO:1902075	cellular response to salt	2/100	196/16917	0.322852	0.501505	0.381359	COL1A1/EDN1	2	Astrocyte
MF	GO:0002039	p53 binding	1/100	66/16917	0.324332	0.501505	0.381359	ANKRD1	1	Astrocyte
BP	GO:0035914	skeletal muscle cell differentiation	1/100	66/16917	0.324332	0.501505	0.381359	ANKRD1	1	Astrocyte
MF	GO:0097110	scaffold protein binding	1/100	66/16917	0.324332	0.501505	0.381359	CAV2	1	Astrocyte
BP	GO:0009306	protein secretion	3/100	339/16917	0.324367	0.501505	0.381359	CAVIN1/TGFB2/ANKRD1	3	Astrocyte
BP	GO:1903037	regulation of leukocyte cell-cell adhesion	3/100	339/16917	0.324367	0.501505	0.381359	LGALS1/CD44/CAV1	3	Astrocyte
BP	GO:0007601	visual perception	2/100	197/16917	0.325022	0.501505	0.381359	TGFBI/COL1A1	2	Astrocyte
BP	GO:0046034	ATP metabolic process	2/100	197/16917	0.325022	0.501505	0.381359	IER3/SLC2A6	2	Astrocyte
BP	GO:1903046	meiotic cell cycle process	2/100	197/16917	0.325022	0.501505	0.381359	MYH9/EDN1	2	Astrocyte
MF	GO:0060090	molecular adaptor activity	4/100	487/16917	0.325111	0.501505	0.381359	MYH9/CAV2/CAV1/TRIM22	4	Astrocyte
BP	GO:0035592	establishment of protein localization to extracellular region	3/100	340/16917	0.325988	0.502425	0.382059	CAVIN1/TGFB2/ANKRD1	3	Astrocyte
BP	GO:0001707	mesoderm formation	1/100	67/16917	0.328342	0.503028	0.382517	GJA1	1	Astrocyte
BP	GO:0003208	cardiac ventricle morphogenesis	1/100	67/16917	0.328342	0.503028	0.382517	TGFB2	1	Astrocyte
BP	GO:0005977	glycogen metabolic process	1/100	67/16917	0.328342	0.503028	0.382517	PHLDA2	1	Astrocyte
BP	GO:0007260	tyrosine phosphorylation of STAT protein	1/100	67/16917	0.328342	0.503028	0.382517	CAV1	1	Astrocyte
BP	GO:0051881	regulation of mitochondrial membrane potential	1/100	67/16917	0.328342	0.503028	0.382517	BOK	1	Astrocyte
BP	GO:0071806	protein transmembrane transport	1/100	67/16917	0.328342	0.503028	0.382517	TRAM2	1	Astrocyte
BP	GO:2000134	negative regulation of G1/S transition of mitotic cell cycle	1/100	67/16917	0.328342	0.503028	0.382517	CDKN2B	1	Astrocyte
BP	GO:0018108	peptidyl-tyrosine phosphorylation	3/100	342/16917	0.329231	0.503338	0.382753	AXL/CD44/CAV1	3	Astrocyte
BP	GO:0072330	monocarboxylic acid biosynthetic process	2/100	199/16917	0.329355	0.503338	0.382753	EDN1/ELOVL1	2	Astrocyte
BP	GO:0006643	membrane lipid metabolic process	2/100	200/16917	0.331519	0.503338	0.382753	ELOVL1/CCN1	2	Astrocyte
BP	GO:0050821	protein stabilization	2/100	200/16917	0.331519	0.503338	0.382753	PARVA/FLNA	2	Astrocyte
BP	GO:0001960	negative regulation of cytokine-mediated signaling pathway	1/100	68/16917	0.332328	0.503338	0.382753	CAV1	1	Astrocyte
BP	GO:0002067	glandular epithelial cell differentiation	1/100	68/16917	0.332328	0.503338	0.382753	CAV1	1	Astrocyte
BP	GO:0006073	cellular glucan metabolic process	1/100	68/16917	0.332328	0.503338	0.382753	PHLDA2	1	Astrocyte
BP	GO:0007585	respiratory gaseous exchange by respiratory system	1/100	68/16917	0.332328	0.503338	0.382753	EDN1	1	Astrocyte
BP	GO:0010827	regulation of glucose transmembrane transport	1/100	68/16917	0.332328	0.503338	0.382753	EDN1	1	Astrocyte
BP	GO:0044042	glucan metabolic process	1/100	68/16917	0.332328	0.503338	0.382753	PHLDA2	1	Astrocyte
BP	GO:0070972	protein localization to endoplasmic reticulum	1/100	68/16917	0.332328	0.503338	0.382753	TRAM2	1	Astrocyte
BP	GO:1901880	negative regulation of protein depolymerization	1/100	68/16917	0.332328	0.503338	0.382753	LIMA1	1	Astrocyte
BP	GO:1902893	regulation of miRNA transcription	1/100	68/16917	0.332328	0.503338	0.382753	TGFB2	1	Astrocyte
BP	GO:0018212	peptidyl-tyrosine modification	3/100	344/16917	0.332473	0.503338	0.382753	AXL/CD44/CAV1	3	Astrocyte
BP	GO:0050953	sensory perception of light stimulus	2/100	201/16917	0.333682	0.504743	0.383821	TGFBI/COL1A1	2	Astrocyte
BP	GO:0071692	protein localization to extracellular region	3/100	346/16917	0.335715	0.506554	0.385198	CAVIN1/TGFB2/ANKRD1	3	Astrocyte
BP	GO:0048332	mesoderm morphogenesis	1/100	69/16917	0.336291	0.506554	0.385198	GJA1	1	Astrocyte
BP	GO:0061614	miRNA transcription	1/100	69/16917	0.336291	0.506554	0.385198	TGFB2	1	Astrocyte
CC	GO:0070821	tertiary granule membrane	1/100	69/16917	0.336291	0.506554	0.385198	PLAU	1	Astrocyte
BP	GO:0097194	execution phase of apoptosis	1/100	69/16917	0.336291	0.506554	0.385198	BOK	1	Astrocyte
BP	GO:0043583	ear development	2/100	204/16917	0.340156	0.510345	0.388081	EDN1/TGFB2	2	Astrocyte
BP	GO:0006919	activation of cysteine-type endopeptidase activity involved in apoptotic process	1/100	70/16917	0.34023	0.510345	0.388081	BOK	1	Astrocyte
BP	GO:0030032	lamellipodium assembly	1/100	70/16917	0.34023	0.510345	0.388081	VCL	1	Astrocyte
BP	GO:0099518	vesicle cytoskeletal trafficking	1/100	70/16917	0.34023	0.510345	0.388081	ACTN4	1	Astrocyte
BP	GO:1901568	fatty acid derivative metabolic process	1/100	70/16917	0.34023	0.510345	0.388081	ELOVL1	1	Astrocyte
CC	GO:0030136	clathrin-coated vesicle	2/100	205/16917	0.342311	0.512609	0.389803	EDN1/SH3BP4	2	Astrocyte
BP	GO:0031396	regulation of protein ubiquitination	2/100	205/16917	0.342311	0.512609	0.389803	PRICKLE1/CAV1	2	Astrocyte
BP	GO:0033143	regulation of intracellular steroid hormone receptor signaling pathway	1/100	71/16917	0.344146	0.51407	0.390914	KDM5D	1	Astrocyte
BP	GO:0035567	non-canonical Wnt signaling pathway	1/100	71/16917	0.344146	0.51407	0.390914	PRICKLE1	1	Astrocyte
BP	GO:2000036	regulation of stem cell population maintenance	1/100	71/16917	0.344146	0.51407	0.390914	LOXL2	1	Astrocyte
BP	GO:0030705	cytoskeleton-dependent intracellular transport	2/100	206/16917	0.344463	0.514115	0.390948	PRICKLE1/ACTN4	2	Astrocyte
BP	GO:1901215	negative regulation of neuron death	2/100	207/16917	0.346613	0.515593	0.392072	AXL/BOK	2	Astrocyte
CC	GO:0005905	clathrin-coated pit	1/100	72/16917	0.348039	0.515593	0.392072	SH3BP4	1	Astrocyte
MF	GO:0016209	antioxidant activity	1/100	72/16917	0.348039	0.515593	0.392072	NQO1	1	Astrocyte
CC	GO:0016529	sarcoplasmic reticulum	1/100	72/16917	0.348039	0.515593	0.392072	THBS1	1	Astrocyte
BP	GO:0030101	natural killer cell activation	1/100	72/16917	0.348039	0.515593	0.392072	AXL	1	Astrocyte
BP	GO:0032410	negative regulation of transporter activity	1/100	72/16917	0.348039	0.515593	0.392072	CAV1	1	Astrocyte
BP	GO:0045685	regulation of glial cell differentiation	1/100	72/16917	0.348039	0.515593	0.392072	WDR1	1	Astrocyte
BP	GO:0046470	phosphatidylcholine metabolic process	1/100	72/16917	0.348039	0.515593	0.392072	CAPN2	1	Astrocyte
BP	GO:0060761	negative regulation of response to cytokine stimulus	1/100	72/16917	0.348039	0.515593	0.392072	CAV1	1	Astrocyte
BP	GO:0042742	defense response to bacterium	2/100	208/16917	0.34876	0.515809	0.392236	SERPINE1/ANXA3	2	Astrocyte
BP	GO:0060541	respiratory system development	2/100	208/16917	0.34876	0.515809	0.392236	PDPN/CCN2	2	Astrocyte
MF	GO:0001618	virus receptor activity	1/100	73/16917	0.35191	0.516216	0.392546	AXL	1	Astrocyte
BP	GO:0003407	neural retina development	1/100	73/16917	0.35191	0.516216	0.392546	TGFB2	1	Astrocyte
MF	GO:0003724	RNA helicase activity	1/100	73/16917	0.35191	0.516216	0.392546	DDX3Y	1	Astrocyte
BP	GO:0010822	positive regulation of mitochondrion organization	1/100	73/16917	0.35191	0.516216	0.392546	BOK	1	Astrocyte
BP	GO:0030500	regulation of bone mineralization	1/100	73/16917	0.35191	0.516216	0.392546	CCN1	1	Astrocyte
BP	GO:0030968	endoplasmic reticulum unfolded protein response	1/100	73/16917	0.35191	0.516216	0.392546	BOK	1	Astrocyte
BP	GO:0061333	renal tubule morphogenesis	1/100	73/16917	0.35191	0.516216	0.392546	COL4A1	1	Astrocyte
BP	GO:1990868	response to chemokine	1/100	73/16917	0.35191	0.516216	0.392546	EDN1	1	Astrocyte
BP	GO:1990869	cellular response to chemokine	1/100	73/16917	0.35191	0.516216	0.392546	EDN1	1	Astrocyte
BP	GO:0016050	vesicle organization	3/100	356/16917	0.351913	0.516216	0.392546	CAV2/CAV1/RAB34	3	Astrocyte
BP	GO:0007188	adenylate cyclase-modulating G protein-coupled receptor signaling pathway	2/100	211/16917	0.355189	0.520154	0.39554	EDN1/FLNA	2	Astrocyte
BP	GO:0046425	regulation of receptor signaling pathway via JAK-STAT	1/100	74/16917	0.355757	0.520154	0.39554	CAV1	1	Astrocyte
MF	GO:0140272	exogenous protein binding	1/100	74/16917	0.355757	0.520154	0.39554	AXL	1	Astrocyte
BP	GO:1902807	negative regulation of cell cycle G1/S phase transition	1/100	74/16917	0.355757	0.520154	0.39554	CDKN2B	1	Astrocyte
BP	GO:0006338	chromatin remodeling	3/100	359/16917	0.356766	0.521204	0.396339	LMNA/LOXL2/KDM5D	3	Astrocyte
BP	GO:0060271	cilium assembly	3/100	360/16917	0.358383	0.52314	0.397811	PRICKLE1/PARVA/FLNA	3	Astrocyte
BP	GO:0002532	production of molecular mediator involved in inflammatory response	1/100	75/16917	0.359582	0.523613	0.398171	SERPINE1	1	Astrocyte
MF	GO:0008186	ATP-dependent activity, acting on RNA	1/100	75/16917	0.359582	0.523613	0.398171	DDX3Y	1	Astrocyte
BP	GO:0050848	regulation of calcium-mediated signaling	1/100	75/16917	0.359582	0.523613	0.398171	LMCD1	1	Astrocyte
MF	GO:0048018	receptor ligand activity	3/100	362/16917	0.361615	0.526145	0.400096	EDN1/CCN2/TGFB2	3	Astrocyte
BP	GO:0010921	regulation of phosphatase activity	1/100	76/16917	0.363385	0.527167	0.400873	TGFB2	1	Astrocyte
CC	GO:0035861	site of double-strand break	1/100	76/16917	0.363385	0.527167	0.400873	LMNA	1	Astrocyte
BP	GO:0006631	fatty acid metabolic process	3/100	364/16917	0.364845	0.527167	0.400873	EDN1/ELOVL1/CAV1	3	Astrocyte
BP	GO:0007411	axon guidance	2/100	216/16917	0.365855	0.527167	0.400873	EDN1/PALLD	2	Astrocyte
BP	GO:0045930	negative regulation of mitotic cell cycle	2/100	216/16917	0.365855	0.527167	0.400873	CDKN2B/IER3	2	Astrocyte
BP	GO:0051651	maintenance of location in cell	2/100	216/16917	0.365855	0.527167	0.400873	CAV1/FLNA	2	Astrocyte
BP	GO:0071241	cellular response to inorganic substance	2/100	216/16917	0.365855	0.527167	0.400873	NQO1/EDN1	2	Astrocyte
BP	GO:0097485	neuron projection guidance	2/100	216/16917	0.365855	0.527167	0.400873	EDN1/PALLD	2	Astrocyte
BP	GO:0018205	peptidyl-lysine modification	3/100	365/16917	0.366459	0.527167	0.400873	LMNA/LOXL2/ZBED1	3	Astrocyte
BP	GO:0001570	vasculogenesis	1/100	77/16917	0.367165	0.527167	0.400873	CAV1	1	Astrocyte
MF	GO:0019199	transmembrane receptor protein kinase activity	1/100	77/16917	0.367165	0.527167	0.400873	AXL	1	Astrocyte
CC	GO:0031234	extrinsic component of cytoplasmic side of plasma membrane	1/100	77/16917	0.367165	0.527167	0.400873	CAV2	1	Astrocyte
BP	GO:0032677	regulation of interleukin-8 production	1/100	77/16917	0.367165	0.527167	0.400873	SERPINE1	1	Astrocyte
BP	GO:0035050	embryonic heart tube development	1/100	77/16917	0.367165	0.527167	0.400873	EDN1	1	Astrocyte
BP	GO:1904063	negative regulation of cation transmembrane transport	1/100	77/16917	0.367165	0.527167	0.400873	CAV1	1	Astrocyte
BP	GO:0002440	production of molecular mediator of immune response	2/100	217/16917	0.367981	0.527167	0.400873	AXL/TGFB2	2	Astrocyte
BP	GO:0006813	potassium ion transport	2/100	218/16917	0.370104	0.527167	0.400873	CAV1/FLNA	2	Astrocyte
BP	GO:0014068	positive regulation of phosphatidylinositol 3-kinase signaling	1/100	78/16917	0.370923	0.527167	0.400873	TGFB2	1	Astrocyte
BP	GO:0019217	regulation of fatty acid metabolic process	1/100	78/16917	0.370923	0.527167	0.400873	CAV1	1	Astrocyte
BP	GO:0032637	interleukin-8 production	1/100	78/16917	0.370923	0.527167	0.400873	SERPINE1	1	Astrocyte
CC	GO:0035578	azurophil granule lumen	1/100	78/16917	0.370923	0.527167	0.400873	CAP1	1	Astrocyte
BP	GO:0043242	negative regulation of protein-containing complex disassembly	1/100	78/16917	0.370923	0.527167	0.400873	LIMA1	1	Astrocyte
BP	GO:0044773	mitotic DNA damage checkpoint signaling	1/100	78/16917	0.370923	0.527167	0.400873	IER3	1	Astrocyte
BP	GO:0048704	embryonic skeletal system morphogenesis	1/100	78/16917	0.370923	0.527167	0.400873	RUNX2	1	Astrocyte
BP	GO:0051153	regulation of striated muscle cell differentiation	1/100	78/16917	0.370923	0.527167	0.400873	EDN1	1	Astrocyte
BP	GO:2000628	regulation of miRNA metabolic process	1/100	78/16917	0.370923	0.527167	0.400873	TGFB2	1	Astrocyte
BP	GO:0031669	cellular response to nutrient levels	2/100	219/16917	0.372224	0.527167	0.400873	COL1A1/CDKN2B	2	Astrocyte
MF	GO:0008514	organic anion transmembrane transporter activity	2/100	220/16917	0.374341	0.527167	0.400873	GJA1/SLC2A6	2	Astrocyte
BP	GO:0009205	purine ribonucleoside triphosphate metabolic process	2/100	220/16917	0.374341	0.527167	0.400873	IER3/SLC2A6	2	Astrocyte
MF	GO:0030546	signaling receptor activator activity	3/100	370/16917	0.374519	0.527167	0.400873	EDN1/CCN2/TGFB2	3	Astrocyte
MF	GO:0005546	phosphatidylinositol-4,5-bisphosphate binding	1/100	79/16917	0.374659	0.527167	0.400873	SYTL2	1	Astrocyte
CC	GO:0005791	rough endoplasmic reticulum	1/100	79/16917	0.374659	0.527167	0.400873	EDN1	1	Astrocyte
BP	GO:0006112	energy reserve metabolic process	1/100	79/16917	0.374659	0.527167	0.400873	PHLDA2	1	Astrocyte
BP	GO:0019915	lipid storage	1/100	79/16917	0.374659	0.527167	0.400873	CAV1	1	Astrocyte
BP	GO:0051781	positive regulation of cell division	1/100	79/16917	0.374659	0.527167	0.400873	TGFB2	1	Astrocyte
BP	GO:0061097	regulation of protein tyrosine kinase activity	1/100	79/16917	0.374659	0.527167	0.400873	CAV1	1	Astrocyte
BP	GO:0061515	myeloid cell development	1/100	79/16917	0.374659	0.527167	0.400873	FLNA	1	Astrocyte
BP	GO:0072527	pyrimidine-containing compound metabolic process	1/100	79/16917	0.374659	0.527167	0.400873	APOBEC3C	1	Astrocyte
BP	GO:1901657	glycosyl compound metabolic process	1/100	79/16917	0.374659	0.527167	0.400873	APOBEC3C	1	Astrocyte
BP	GO:1902117	positive regulation of organelle assembly	1/100	79/16917	0.374659	0.527167	0.400873	MSN	1	Astrocyte
BP	GO:2000106	regulation of leukocyte apoptotic process	1/100	79/16917	0.374659	0.527167	0.400873	AXL	1	Astrocyte
BP	GO:2001021	negative regulation of response to DNA damage stimulus	1/100	79/16917	0.374659	0.527167	0.400873	CD44	1	Astrocyte
BP	GO:0014032	neural crest cell development	1/100	80/16917	0.378373	0.530585	0.403473	EDN1	1	Astrocyte
BP	GO:0046849	bone remodeling	1/100	80/16917	0.378373	0.530585	0.403473	GJA1	1	Astrocyte
BP	GO:0072665	protein localization to vacuole	1/100	80/16917	0.378373	0.530585	0.403473	SH3BP4	1	Astrocyte
BP	GO:1904892	regulation of receptor signaling pathway via STAT	1/100	80/16917	0.378373	0.530585	0.403473	CAV1	1	Astrocyte
MF	GO:0001664	G protein-coupled receptor binding	2/100	222/16917	0.378567	0.530585	0.403473	EDN1/FLNA	2	Astrocyte
BP	GO:0010001	glial cell differentiation	2/100	223/16917	0.380675	0.531749	0.404357	WDR1/BOK	2	Astrocyte
BP	GO:0002312	B cell activation involved in immune response	1/100	81/16917	0.382065	0.531749	0.404357	LGALS1	1	Astrocyte
MF	GO:0005179	hormone activity	1/100	81/16917	0.382065	0.531749	0.404357	EDN1	1	Astrocyte
BP	GO:0007492	endoderm development	1/100	81/16917	0.382065	0.531749	0.404357	MMP2	1	Astrocyte
CC	GO:0016591	RNA polymerase II, holoenzyme	1/100	81/16917	0.382065	0.531749	0.404357	POLR2L	1	Astrocyte
BP	GO:0030433	ubiquitin-dependent ERAD pathway	1/100	81/16917	0.382065	0.531749	0.404357	CAV1	1	Astrocyte
BP	GO:0031397	negative regulation of protein ubiquitination	1/100	81/16917	0.382065	0.531749	0.404357	CAV1	1	Astrocyte
BP	GO:0031507	heterochromatin formation	1/100	81/16917	0.382065	0.531749	0.404357	LMNA	1	Astrocyte
MF	GO:0038024	cargo receptor activity	1/100	81/16917	0.382065	0.531749	0.404357	LOXL2	1	Astrocyte
BP	GO:0009144	purine nucleoside triphosphate metabolic process	2/100	225/16917	0.384884	0.533135	0.405411	IER3/SLC2A6	2	Astrocyte
BP	GO:1903050	regulation of proteolysis involved in protein catabolic process	2/100	225/16917	0.384884	0.533135	0.405411	PRICKLE1/CAV1	2	Astrocyte
MF	GO:0008135	translation factor activity, RNA binding	1/100	82/16917	0.385735	0.533135	0.405411	EIF1AY	1	Astrocyte
BP	GO:0021675	nerve development	1/100	82/16917	0.385735	0.533135	0.405411	EDN1	1	Astrocyte
BP	GO:0042773	ATP synthesis coupled electron transport	1/100	82/16917	0.385735	0.533135	0.405411	CHCHD2	1	Astrocyte
BP	GO:0042775	mitochondrial ATP synthesis coupled electron transport	1/100	82/16917	0.385735	0.533135	0.405411	CHCHD2	1	Astrocyte
BP	GO:0044774	mitotic DNA integrity checkpoint signaling	1/100	82/16917	0.385735	0.533135	0.405411	IER3	1	Astrocyte
BP	GO:0140029	exocytic process	1/100	82/16917	0.385735	0.533135	0.405411	SYTL2	1	Astrocyte
BP	GO:1900182	positive regulation of protein localization to nucleus	1/100	82/16917	0.385735	0.533135	0.405411	FLNA	1	Astrocyte
BP	GO:0010959	regulation of metal ion transport	3/100	379/16917	0.38898	0.534472	0.406428	CAV1/ACTN4/FLNA	3	Astrocyte
BP	GO:0009199	ribonucleoside triphosphate metabolic process	2/100	227/16917	0.38908	0.534472	0.406428	IER3/SLC2A6	2	Astrocyte
BP	GO:0050730	regulation of peptidyl-tyrosine phosphorylation	2/100	227/16917	0.38908	0.534472	0.406428	CD44/CAV1	2	Astrocyte
BP	GO:0000281	mitotic cytokinesis	1/100	83/16917	0.389384	0.534472	0.406428	RHOC	1	Astrocyte
MF	GO:0001540	amyloid-beta binding	1/100	83/16917	0.389384	0.534472	0.406428	TGFB2	1	Astrocyte
MF	GO:0003727	single-stranded RNA binding	1/100	83/16917	0.389384	0.534472	0.406428	RBMS1	1	Astrocyte
BP	GO:0009798	axis specification	1/100	83/16917	0.389384	0.534472	0.406428	PRICKLE1	1	Astrocyte
MF	GO:0030165	PDZ domain binding	1/100	83/16917	0.389384	0.534472	0.406428	SDC2	1	Astrocyte
BP	GO:0046620	regulation of organ growth	1/100	83/16917	0.389384	0.534472	0.406428	EDN1	1	Astrocyte
BP	GO:0030098	lymphocyte differentiation	3/100	380/16917	0.390582	0.535707	0.407367	LGALS1/AXL/RUNX2	3	Astrocyte
BP	GO:0001942	hair follicle development	1/100	84/16917	0.393011	0.536923	0.408292	TGFB2	1	Astrocyte
BP	GO:0002028	regulation of sodium ion transport	1/100	84/16917	0.393011	0.536923	0.408292	ACTN4	1	Astrocyte
BP	GO:0021766	hippocampus development	1/100	84/16917	0.393011	0.536923	0.408292	ANXA3	1	Astrocyte
BP	GO:0034766	negative regulation of monoatomic ion transmembrane transport	1/100	84/16917	0.393011	0.536923	0.408292	CAV1	1	Astrocyte
BP	GO:0051591	response to cAMP	1/100	84/16917	0.393011	0.536923	0.408292	COL1A1	1	Astrocyte
BP	GO:0016358	dendrite development	2/100	229/16917	0.393265	0.536923	0.408292	PRICKLE1/SDC2	2	Astrocyte
BP	GO:0050870	positive regulation of T cell activation	2/100	230/16917	0.395352	0.538223	0.409281	LGALS1/CAV1	2	Astrocyte
CC	GO:0005796	Golgi lumen	1/100	85/16917	0.396617	0.538223	0.409281	SDC2	1	Astrocyte
MF	GO:0008081	phosphoric diester hydrolase activity	1/100	85/16917	0.396617	0.538223	0.409281	PDE1C	1	Astrocyte
BP	GO:0009953	dorsal/ventral pattern formation	1/100	85/16917	0.396617	0.538223	0.409281	EDN1	1	Astrocyte
MF	GO:0043178	alcohol binding	1/100	85/16917	0.396617	0.538223	0.409281	CAV1	1	Astrocyte
MF	GO:0051117	ATPase binding	1/100	85/16917	0.396617	0.538223	0.409281	CAV1	1	Astrocyte
BP	GO:0071277	cellular response to calcium ion	1/100	85/16917	0.396617	0.538223	0.409281	EDN1	1	Astrocyte
BP	GO:0098869	cellular oxidant detoxification	1/100	85/16917	0.396617	0.538223	0.409281	NQO1	1	Astrocyte
BP	GO:0045927	positive regulation of growth	2/100	231/16917	0.397436	0.53852	0.409506	EDN1/TGFB2	2	Astrocyte
BP	GO:0046883	regulation of hormone secretion	2/100	231/16917	0.397436	0.53852	0.409506	GJA1/EDN1	2	Astrocyte
MF	GO:0004843	cysteine-type deubiquitinase activity	1/100	86/16917	0.400202	0.540634	0.411114	USP9Y	1	Astrocyte
BP	GO:0032092	positive regulation of protein binding	1/100	86/16917	0.400202	0.540634	0.411114	CAV1	1	Astrocyte
BP	GO:0048864	stem cell development	1/100	86/16917	0.400202	0.540634	0.411114	EDN1	1	Astrocyte
BP	GO:0050000	chromosome localization	1/100	86/16917	0.400202	0.540634	0.411114	LMNA	1	Astrocyte
BP	GO:0044782	cilium organization	3/100	388/16917	0.403364	0.542588	0.4126	PRICKLE1/PARVA/FLNA	3	Astrocyte
BP	GO:0032984	protein-containing complex disassembly	2/100	234/16917	0.403669	0.542588	0.4126	LIMA1/WDR1	2	Astrocyte
BP	GO:0006641	triglyceride metabolic process	1/100	87/16917	0.403765	0.542588	0.4126	CAV1	1	Astrocyte
BP	GO:0022404	molting cycle process	1/100	87/16917	0.403765	0.542588	0.4126	TGFB2	1	Astrocyte
BP	GO:0022405	hair cycle process	1/100	87/16917	0.403765	0.542588	0.4126	TGFB2	1	Astrocyte
BP	GO:0031058	positive regulation of histone modification	1/100	87/16917	0.403765	0.542588	0.4126	LMNA	1	Astrocyte
CC	GO:0045171	intercellular bridge	1/100	87/16917	0.403765	0.542588	0.4126	TUBB6	1	Astrocyte
BP	GO:0090068	positive regulation of cell cycle process	2/100	235/16917	0.40574	0.544833	0.414307	EDN1/CCN2	2	Astrocyte
MF	GO:0019888	protein phosphatase regulator activity	1/100	88/16917	0.407308	0.5449	0.414358	IGFBP3	1	Astrocyte
CC	GO:0035579	specific granule membrane	1/100	88/16917	0.407308	0.5449	0.414358	PLAU	1	Astrocyte
BP	GO:0044264	cellular polysaccharide metabolic process	1/100	88/16917	0.407308	0.5449	0.414358	PHLDA2	1	Astrocyte
BP	GO:0048477	oogenesis	1/100	88/16917	0.407308	0.5449	0.414358	EDN1	1	Astrocyte
BP	GO:1904427	positive regulation of calcium ion transmembrane transport	1/100	88/16917	0.407308	0.5449	0.414358	CAV1	1	Astrocyte
BP	GO:0000209	protein polyubiquitination	2/100	236/16917	0.407807	0.545161	0.414557	NQO1/TRIM22	2	Astrocyte
CC	GO:0005798	Golgi-associated vesicle	1/100	89/16917	0.41083	0.547977	0.416698	GJA1	1	Astrocyte
BP	GO:0006637	acyl-CoA metabolic process	1/100	89/16917	0.41083	0.547977	0.416698	ELOVL1	1	Astrocyte
BP	GO:0035383	thioester metabolic process	1/100	89/16917	0.41083	0.547977	0.416698	ELOVL1	1	Astrocyte
BP	GO:0031349	positive regulation of defense response	3/100	393/16917	0.411316	0.548217	0.416881	LGALS1/CAV1/SERPINE1	3	Astrocyte
BP	GO:0043547	positive regulation of GTPase activity	2/100	239/16917	0.41399	0.551008	0.419003	CAV2/LIMS1	2	Astrocyte
BP	GO:0034644	cellular response to UV	1/100	90/16917	0.414331	0.551008	0.419003	MMP2	1	Astrocyte
BP	GO:2001243	negative regulation of intrinsic apoptotic signaling pathway	1/100	90/16917	0.414331	0.551008	0.419003	CD44	1	Astrocyte
BP	GO:0006835	dicarboxylic acid transport	1/100	91/16917	0.417812	0.552768	0.420341	GJA1	1	Astrocyte
BP	GO:0008593	regulation of Notch signaling pathway	1/100	91/16917	0.417812	0.552768	0.420341	TGFB2	1	Astrocyte
BP	GO:0032760	positive regulation of tumor necrosis factor production	1/100	91/16917	0.417812	0.552768	0.420341	THBS1	1	Astrocyte
BP	GO:0045995	regulation of embryonic development	1/100	91/16917	0.417812	0.552768	0.420341	PHLDA2	1	Astrocyte
BP	GO:0060021	roof of mouth development	1/100	91/16917	0.417812	0.552768	0.420341	TGFB2	1	Astrocyte
BP	GO:0070167	regulation of biomineral tissue development	1/100	91/16917	0.417812	0.552768	0.420341	CCN1	1	Astrocyte
BP	GO:1903321	negative regulation of protein modification by small protein conjugation or removal	1/100	91/16917	0.417812	0.552768	0.420341	CAV1	1	Astrocyte
MF	GO:0030545	signaling receptor regulator activity	3/100	399/16917	0.420817	0.554891	0.421955	EDN1/CCN2/TGFB2	3	Astrocyte
BP	GO:0001938	positive regulation of endothelial cell proliferation	1/100	92/16917	0.421272	0.554891	0.421955	CAV2	1	Astrocyte
BP	GO:0006576	biogenic amine metabolic process	1/100	92/16917	0.421272	0.554891	0.421955	TGFB2	1	Astrocyte
BP	GO:0032091	negative regulation of protein binding	1/100	92/16917	0.421272	0.554891	0.421955	CAV1	1	Astrocyte
BP	GO:0043279	response to alkaloid	1/100	92/16917	0.421272	0.554891	0.421955	NQO1	1	Astrocyte
MF	GO:0101005	deubiquitinase activity	1/100	92/16917	0.421272	0.554891	0.421955	USP9Y	1	Astrocyte
BP	GO:1901988	negative regulation of cell cycle phase transition	2/100	243/16917	0.422184	0.555684	0.422559	CDKN2B/IER3	2	Astrocyte
BP	GO:0000819	sister chromatid segregation	2/100	244/16917	0.424223	0.555749	0.422608	PRICKLE1/FLNA	2	Astrocyte
BP	GO:0006814	sodium ion transport	2/100	244/16917	0.424223	0.555749	0.422608	EDN1/ACTN4	2	Astrocyte
BP	GO:0009141	nucleoside triphosphate metabolic process	2/100	244/16917	0.424223	0.555749	0.422608	IER3/SLC2A6	2	Astrocyte
MF	GO:0030246	carbohydrate binding	2/100	244/16917	0.424223	0.555749	0.422608	LGALS1/LOXL2	2	Astrocyte
BP	GO:0002753	cytosolic pattern recognition receptor signaling pathway	1/100	93/16917	0.424711	0.555749	0.422608	CAV1	1	Astrocyte
BP	GO:0014033	neural crest cell differentiation	1/100	93/16917	0.424711	0.555749	0.422608	EDN1	1	Astrocyte
BP	GO:0019233	sensory perception of pain	1/100	93/16917	0.424711	0.555749	0.422608	EDN1	1	Astrocyte
BP	GO:0062014	negative regulation of small molecule metabolic process	1/100	93/16917	0.424711	0.555749	0.422608	IER3	1	Astrocyte
CC	GO:0030133	transport vesicle	3/100	402/16917	0.425549	0.55644	0.423133	CAV2/EDN1/SYTL2	3	Astrocyte
MF	GO:0005496	steroid binding	1/100	94/16917	0.428131	0.556779	0.423391	CAV1	1	Astrocyte
BP	GO:0010389	regulation of G2/M transition of mitotic cell cycle	1/100	94/16917	0.428131	0.556779	0.423391	IER3	1	Astrocyte
BP	GO:0010586	miRNA metabolic process	1/100	94/16917	0.428131	0.556779	0.423391	TGFB2	1	Astrocyte
BP	GO:0022600	digestive system process	1/100	94/16917	0.428131	0.556779	0.423391	LIMA1	1	Astrocyte
BP	GO:0045814	negative regulation of gene expression, epigenetic	1/100	94/16917	0.428131	0.556779	0.423391	LMNA	1	Astrocyte
BP	GO:0072676	lymphocyte migration	1/100	94/16917	0.428131	0.556779	0.423391	MSN	1	Astrocyte
BP	GO:1903557	positive regulation of tumor necrosis factor superfamily cytokine production	1/100	94/16917	0.428131	0.556779	0.423391	THBS1	1	Astrocyte
CC	GO:0036464	cytoplasmic ribonucleoprotein granule	2/100	246/16917	0.428291	0.556779	0.423391	DDX3Y/APOBEC3C	2	Astrocyte
BP	GO:1903320	regulation of protein modification by small protein conjugation or removal	2/100	247/16917	0.43032	0.558964	0.425053	PRICKLE1/CAV1	2	Astrocyte
BP	GO:0001776	leukocyte homeostasis	1/100	95/16917	0.43153	0.558964	0.425053	AXL	1	Astrocyte
MF	GO:0003730	mRNA 3'-UTR binding	1/100	95/16917	0.43153	0.558964	0.425053	RBMS1	1	Astrocyte
BP	GO:0034620	cellular response to unfolded protein	1/100	95/16917	0.43153	0.558964	0.425053	BOK	1	Astrocyte
BP	GO:0042116	macrophage activation	1/100	95/16917	0.43153	0.558964	0.425053	THBS1	1	Astrocyte
CC	GO:0000932	P-body	1/100	96/16917	0.434909	0.561719	0.427148	APOBEC3C	1	Astrocyte
BP	GO:0014013	regulation of gliogenesis	1/100	96/16917	0.434909	0.561719	0.427148	CDKN2B	1	Astrocyte
BP	GO:0090288	negative regulation of cellular response to growth factor stimulus	1/100	96/16917	0.434909	0.561719	0.427148	THBS1	1	Astrocyte
BP	GO:1903510	mucopolysaccharide metabolic process	1/100	96/16917	0.434909	0.561719	0.427148	CD44	1	Astrocyte
BP	GO:0009150	purine ribonucleotide metabolic process	3/100	409/16917	0.436541	0.56342	0.428441	ELOVL1/IER3/SLC2A6	3	Astrocyte
BP	GO:0010906	regulation of glucose metabolic process	1/100	97/16917	0.438269	0.564597	0.429336	IGFBP3	1	Astrocyte
CC	GO:0043202	lysosomal lumen	1/100	97/16917	0.438269	0.564597	0.429336	SDC2	1	Astrocyte
BP	GO:0050708	regulation of protein secretion	2/100	251/16917	0.438397	0.564597	0.429336	TGFB2/ANKRD1	2	Astrocyte
CC	GO:0005811	lipid droplet	1/100	98/16917	0.441609	0.567511	0.431552	CAV1	1	Astrocyte
BP	GO:0008585	female gonad development	1/100	98/16917	0.441609	0.567511	0.431552	MMP2	1	Astrocyte
BP	GO:0019080	viral gene expression	1/100	98/16917	0.441609	0.567511	0.431552	IFITM3	1	Astrocyte
BP	GO:0090150	establishment of protein localization to membrane	2/100	253/16917	0.442412	0.568137	0.432028	TRAM2/RAB34	2	Astrocyte
BP	GO:0032868	response to insulin	2/100	254/16917	0.444414	0.568925	0.432627	COL1A1/CAV2	2	Astrocyte
BP	GO:0005976	polysaccharide metabolic process	1/100	99/16917	0.444929	0.568925	0.432627	PHLDA2	1	Astrocyte
BP	GO:0007040	lysosome organization	1/100	99/16917	0.444929	0.568925	0.432627	RAB34	1	Astrocyte
CC	GO:0032588	trans-Golgi network membrane	1/100	99/16917	0.444929	0.568925	0.432627	BOK	1	Astrocyte
BP	GO:0062207	regulation of pattern recognition receptor signaling pathway	1/100	99/16917	0.444929	0.568925	0.432627	CAV1	1	Astrocyte
BP	GO:0080171	lytic vacuole organization	1/100	99/16917	0.444929	0.568925	0.432627	RAB34	1	Astrocyte
BP	GO:0007200	phospholipase C-activating G protein-coupled receptor signaling pathway	1/100	100/16917	0.448229	0.571516	0.434598	EDN1	1	Astrocyte
BP	GO:0050773	regulation of dendrite development	1/100	100/16917	0.448229	0.571516	0.434598	SDC2	1	Astrocyte
CC	GO:0055038	recycling endosome membrane	1/100	100/16917	0.448229	0.571516	0.434598	BOK	1	Astrocyte
CC	GO:0072562	blood microparticle	1/100	100/16917	0.448229	0.571516	0.434598	MSN	1	Astrocyte
BP	GO:0000079	regulation of cyclin-dependent protein serine/threonine kinase activity	1/100	101/16917	0.45151	0.573255	0.43592	CDKN2B	1	Astrocyte
BP	GO:0006766	vitamin metabolic process	1/100	101/16917	0.45151	0.573255	0.43592	NQO1	1	Astrocyte
BP	GO:0006885	regulation of pH	1/100	101/16917	0.45151	0.573255	0.43592	EDN1	1	Astrocyte
BP	GO:0006892	post-Golgi vesicle-mediated transport	1/100	101/16917	0.45151	0.573255	0.43592	RAB34	1	Astrocyte
BP	GO:0034968	histone lysine methylation	1/100	101/16917	0.45151	0.573255	0.43592	LMNA	1	Astrocyte
BP	GO:1990748	cellular detoxification	1/100	101/16917	0.45151	0.573255	0.43592	NQO1	1	Astrocyte
BP	GO:0014066	regulation of phosphatidylinositol 3-kinase signaling	1/100	102/16917	0.454772	0.573742	0.43629	TGFB2	1	Astrocyte
CC	GO:0016605	PML body	1/100	102/16917	0.454772	0.573742	0.43629	ZBED1	1	Astrocyte
BP	GO:0032612	interleukin-1 production	1/100	102/16917	0.454772	0.573742	0.43629	S100A13	1	Astrocyte
BP	GO:0032652	regulation of interleukin-1 production	1/100	102/16917	0.454772	0.573742	0.43629	S100A13	1	Astrocyte
BP	GO:0046545	development of primary female sexual characteristics	1/100	102/16917	0.454772	0.573742	0.43629	MMP2	1	Astrocyte
BP	GO:0048259	regulation of receptor-mediated endocytosis	1/100	102/16917	0.454772	0.573742	0.43629	SERPINE1	1	Astrocyte
MF	GO:0051087	chaperone binding	1/100	102/16917	0.454772	0.573742	0.43629	PDPN	1	Astrocyte
MF	GO:0090079	translation regulator activity, nucleic acid binding	1/100	102/16917	0.454772	0.573742	0.43629	EIF1AY	1	Astrocyte
BP	GO:1901655	cellular response to ketone	1/100	102/16917	0.454772	0.573742	0.43629	MSN	1	Astrocyte
BP	GO:0015850	organic hydroxy compound transport	2/100	260/16917	0.456342	0.575318	0.437489	CAV1/LIMA1	2	Astrocyte
BP	GO:0022904	respiratory electron transport chain	1/100	103/16917	0.458014	0.576996	0.438765	CHCHD2	1	Astrocyte
BP	GO:0051321	meiotic cell cycle	2/100	261/16917	0.458316	0.576996	0.438765	MYH9/EDN1	2	Astrocyte
BP	GO:0048562	embryonic organ morphogenesis	2/100	262/16917	0.460286	0.578239	0.43971	EDN1/RUNX2	2	Astrocyte
BP	GO:0001676	long-chain fatty acid metabolic process	1/100	104/16917	0.461238	0.578239	0.43971	ELOVL1	1	Astrocyte
BP	GO:0006805	xenobiotic metabolic process	1/100	104/16917	0.461238	0.578239	0.43971	NQO1	1	Astrocyte
BP	GO:0009408	response to heat	1/100	104/16917	0.461238	0.578239	0.43971	THBS1	1	Astrocyte
CC	GO:0031985	Golgi cisterna	1/100	104/16917	0.461238	0.578239	0.43971	RAB34	1	Astrocyte
MF	GO:1902936	phosphatidylinositol bisphosphate binding	1/100	104/16917	0.461238	0.578239	0.43971	SYTL2	1	Astrocyte
CC	GO:0035770	ribonucleoprotein granule	2/100	264/16917	0.464214	0.578617	0.439998	DDX3Y/APOBEC3C	2	Astrocyte
BP	GO:0009259	ribonucleotide metabolic process	3/100	427/16917	0.464442	0.578617	0.439998	ELOVL1/IER3/SLC2A6	3	Astrocyte
BP	GO:0018958	phenol-containing compound metabolic process	1/100	105/16917	0.464442	0.578617	0.439998	TGFB2	1	Astrocyte
BP	GO:0032147	activation of protein kinase activity	1/100	105/16917	0.464442	0.578617	0.439998	TGFB2	1	Astrocyte
CC	GO:0055029	nuclear DNA-directed RNA polymerase complex	1/100	105/16917	0.464442	0.578617	0.439998	POLR2L	1	Astrocyte
BP	GO:0071887	leukocyte apoptotic process	1/100	105/16917	0.464442	0.578617	0.439998	AXL	1	Astrocyte
BP	GO:1902414	protein localization to cell junction	1/100	105/16917	0.464442	0.578617	0.439998	VCL	1	Astrocyte
BP	GO:1902749	regulation of cell cycle G2/M phase transition	1/100	105/16917	0.464442	0.578617	0.439998	IER3	1	Astrocyte
BP	GO:1904029	regulation of cyclin-dependent protein kinase activity	1/100	105/16917	0.464442	0.578617	0.439998	CDKN2B	1	Astrocyte
BP	GO:0002683	negative regulation of immune system process	3/100	428/16917	0.465975	0.579967	0.441024	THBS1/AXL/TGFB2	3	Astrocyte
BP	GO:0098742	cell-cell adhesion via plasma-membrane adhesion molecules	2/100	265/16917	0.466172	0.579967	0.441024	PALLD/TGFB2	2	Astrocyte
BP	GO:0042303	molting cycle	1/100	106/16917	0.467628	0.58057	0.441483	TGFB2	1	Astrocyte
BP	GO:0042633	hair cycle	1/100	106/16917	0.467628	0.58057	0.441483	TGFB2	1	Astrocyte
BP	GO:0120034	positive regulation of plasma membrane bounded cell projection assembly	1/100	106/16917	0.467628	0.58057	0.441483	CDC42EP1	1	Astrocyte
MF	GO:0019783	ubiquitin-like protein peptidase activity	1/100	107/16917	0.470795	0.583291	0.443552	USP9Y	1	Astrocyte
BP	GO:0036503	ERAD pathway	1/100	107/16917	0.470795	0.583291	0.443552	CAV1	1	Astrocyte
CC	GO:0090734	site of DNA damage	1/100	107/16917	0.470795	0.583291	0.443552	LMNA	1	Astrocyte
CC	GO:0000428	DNA-directed RNA polymerase complex	1/100	108/16917	0.473943	0.585977	0.445594	POLR2L	1	Astrocyte
MF	GO:0009055	electron transfer activity	1/100	108/16917	0.473943	0.585977	0.445594	LOXL2	1	Astrocyte
BP	GO:0032006	regulation of TOR signaling	1/100	108/16917	0.473943	0.585977	0.445594	SH3BP4	1	Astrocyte
BP	GO:0010975	regulation of neuron projection development	3/100	435/16917	0.476655	0.588225	0.447304	SPOCK1/SDC2/FLNA	3	Astrocyte
BP	GO:0019693	ribose phosphate metabolic process	3/100	435/16917	0.476655	0.588225	0.447304	ELOVL1/IER3/SLC2A6	3	Astrocyte
BP	GO:0006690	icosanoid metabolic process	1/100	109/16917	0.477072	0.588225	0.447304	EDN1	1	Astrocyte
BP	GO:0007173	epidermal growth factor receptor signaling pathway	1/100	109/16917	0.477072	0.588225	0.447304	PRICKLE1	1	Astrocyte
CC	GO:0150034	distal axon	2/100	271/16917	0.47783	0.588754	0.447706	PALLD/FLNA	2	Astrocyte
BP	GO:0001824	blastocyst development	1/100	110/16917	0.480183	0.58963	0.448372	CAPN2	1	Astrocyte
BP	GO:0009308	amine metabolic process	1/100	110/16917	0.480183	0.58963	0.448372	TGFB2	1	Astrocyte
BP	GO:0032609	type II interferon production	1/100	110/16917	0.480183	0.58963	0.448372	AXL	1	Astrocyte
BP	GO:0032649	regulation of type II interferon production	1/100	110/16917	0.480183	0.58963	0.448372	AXL	1	Astrocyte
BP	GO:0097237	cellular response to toxic substance	1/100	110/16917	0.480183	0.58963	0.448372	NQO1	1	Astrocyte
BP	GO:0001819	positive regulation of cytokine production	3/100	438/16917	0.481203	0.590196	0.448802	S100A13/THBS1/SERPINE1	3	Astrocyte
BP	GO:0002456	T cell mediated immunity	1/100	111/16917	0.483276	0.590196	0.448802	KDM5D	1	Astrocyte
BP	GO:0006304	DNA modification	1/100	111/16917	0.483276	0.590196	0.448802	APOBEC3C	1	Astrocyte
BP	GO:0021761	limbic system development	1/100	111/16917	0.483276	0.590196	0.448802	ANXA3	1	Astrocyte
CC	GO:0030880	RNA polymerase complex	1/100	111/16917	0.483276	0.590196	0.448802	POLR2L	1	Astrocyte
CC	GO:0042470	melanosome	1/100	111/16917	0.483276	0.590196	0.448802	SYTL2	1	Astrocyte
BP	GO:0043271	negative regulation of monoatomic ion transport	1/100	111/16917	0.483276	0.590196	0.448802	CAV1	1	Astrocyte
CC	GO:0048770	pigment granule	1/100	111/16917	0.483276	0.590196	0.448802	SYTL2	1	Astrocyte
MF	GO:0042277	peptide binding	2/100	275/16917	0.485517	0.591535	0.44982	PPIC/TGFB2	2	Astrocyte
BP	GO:0006639	acylglycerol metabolic process	1/100	112/16917	0.486351	0.591535	0.44982	CAV1	1	Astrocyte
BP	GO:0033865	nucleoside bisphosphate metabolic process	1/100	112/16917	0.486351	0.591535	0.44982	ELOVL1	1	Astrocyte
BP	GO:0033875	ribonucleoside bisphosphate metabolic process	1/100	112/16917	0.486351	0.591535	0.44982	ELOVL1	1	Astrocyte
BP	GO:0034032	purine nucleoside bisphosphate metabolic process	1/100	112/16917	0.486351	0.591535	0.44982	ELOVL1	1	Astrocyte
BP	GO:0061640	cytoskeleton-dependent cytokinesis	1/100	112/16917	0.486351	0.591535	0.44982	RHOC	1	Astrocyte
BP	GO:0072659	protein localization to plasma membrane	2/100	277/16917	0.489334	0.593642	0.451423	RAB34/FLNA	2	Astrocyte
MF	GO:0003774	cytoskeletal motor activity	1/100	113/16917	0.489407	0.593642	0.451423	MYH9	1	Astrocyte
BP	GO:0006476	protein deacetylation	1/100	113/16917	0.489407	0.593642	0.451423	FLNA	1	Astrocyte
BP	GO:0006638	neutral lipid metabolic process	1/100	113/16917	0.489407	0.593642	0.451423	CAV1	1	Astrocyte
BP	GO:0018105	peptidyl-serine phosphorylation	2/100	278/16917	0.491237	0.595056	0.452498	CD44/CAV1	2	Astrocyte
CC	GO:0019898	extrinsic component of membrane	2/100	278/16917	0.491237	0.595056	0.452498	CAV2/SYTL2	2	Astrocyte
BP	GO:0042471	ear morphogenesis	1/100	114/16917	0.492446	0.596119	0.453306	EDN1	1	Astrocyte
BP	GO:0035967	cellular response to topologically incorrect protein	1/100	115/16917	0.495467	0.598967	0.455472	BOK	1	Astrocyte
BP	GO:0045471	response to ethanol	1/100	115/16917	0.495467	0.598967	0.455472	NQO1	1	Astrocyte
MF	GO:0003697	single-stranded DNA binding	1/100	116/16917	0.498469	0.601381	0.457308	RBMS1	1	Astrocyte
BP	GO:0030203	glycosaminoglycan metabolic process	1/100	116/16917	0.498469	0.601381	0.457308	CD44	1	Astrocyte
BP	GO:0098754	detoxification	1/100	116/16917	0.498469	0.601381	0.457308	NQO1	1	Astrocyte
BP	GO:0010948	negative regulation of cell cycle process	2/100	283/16917	0.500682	0.603645	0.459029	CDKN2B/IER3	2	Astrocyte
BP	GO:0010565	regulation of cellular ketone metabolic process	1/100	117/16917	0.501455	0.603765	0.459121	CAV1	1	Astrocyte
MF	GO:0042826	histone deacetylase binding	1/100	117/16917	0.501455	0.603765	0.459121	ANKRD1	1	Astrocyte
BP	GO:0050808	synapse organization	3/100	452/16917	0.502183	0.603877	0.459206	COL4A1/ACTN1/FLNA	3	Astrocyte
CC	GO:0005770	late endosome	2/100	284/16917	0.502558	0.603877	0.459206	IFITM3/IFITM2	2	Astrocyte
BP	GO:0048872	homeostasis of number of cells	2/100	284/16917	0.502558	0.603877	0.459206	AXL/FSTL1	2	Astrocyte
BP	GO:0003014	renal system process	1/100	118/16917	0.504422	0.604902	0.459985	EDN1	1	Astrocyte
BP	GO:0006413	translational initiation	1/100	118/16917	0.504422	0.604902	0.459985	EIF1AY	1	Astrocyte
BP	GO:0048565	digestive tract development	1/100	118/16917	0.504422	0.604902	0.459985	TGFB2	1	Astrocyte
BP	GO:0046879	hormone secretion	2/100	286/16917	0.506296	0.606009	0.460827	GJA1/EDN1	2	Astrocyte
BP	GO:0034248	regulation of amide metabolic process	3/100	455/16917	0.506624	0.606009	0.460827	THBS1/CCN1/PRR16	3	Astrocyte
BP	GO:0000077	DNA damage checkpoint signaling	1/100	119/16917	0.507372	0.606009	0.460827	IER3	1	Astrocyte
BP	GO:0008286	insulin receptor signaling pathway	1/100	119/16917	0.507372	0.606009	0.460827	CAV2	1	Astrocyte
CC	GO:1904813	ficolin-1-rich granule lumen	1/100	119/16917	0.507372	0.606009	0.460827	VCL	1	Astrocyte
BP	GO:2000278	regulation of DNA biosynthetic process	1/100	119/16917	0.507372	0.606009	0.460827	ANKRD1	1	Astrocyte
BP	GO:0007498	mesoderm development	1/100	120/16917	0.510305	0.607087	0.461647	GJA1	1	Astrocyte
BP	GO:0018022	peptidyl-lysine methylation	1/100	120/16917	0.510305	0.607087	0.461647	LMNA	1	Astrocyte
BP	GO:0035303	regulation of dephosphorylation	1/100	120/16917	0.510305	0.607087	0.461647	TGFB2	1	Astrocyte
BP	GO:0051209	release of sequestered calcium ion into cytosol	1/100	120/16917	0.510305	0.607087	0.461647	FLNA	1	Astrocyte
BP	GO:0051928	positive regulation of calcium ion transport	1/100	120/16917	0.510305	0.607087	0.461647	CAV1	1	Astrocyte
BP	GO:0071482	cellular response to light stimulus	1/100	120/16917	0.510305	0.607087	0.461647	MMP2	1	Astrocyte
BP	GO:0051249	regulation of lymphocyte activation	3/100	458/16917	0.511045	0.607565	0.46201	LGALS1/AXL/CAV1	3	Astrocyte
BP	GO:0006612	protein targeting to membrane	1/100	121/16917	0.51322	0.607734	0.462139	TRAM2	1	Astrocyte
BP	GO:0007586	digestion	1/100	121/16917	0.51322	0.607734	0.462139	LIMA1	1	Astrocyte
MF	GO:0017124	SH3 domain binding	1/100	121/16917	0.51322	0.607734	0.462139	ADAM12	1	Astrocyte
BP	GO:0045621	positive regulation of lymphocyte differentiation	1/100	121/16917	0.51322	0.607734	0.462139	AXL	1	Astrocyte
BP	GO:0046683	response to organophosphorus	1/100	121/16917	0.51322	0.607734	0.462139	COL1A1	1	Astrocyte
BP	GO:0051283	negative regulation of sequestering of calcium ion	1/100	121/16917	0.51322	0.607734	0.462139	FLNA	1	Astrocyte
BP	GO:0031623	receptor internalization	1/100	123/16917	0.518999	0.613363	0.466419	CAV1	1	Astrocyte
BP	GO:0051282	regulation of sequestering of calcium ion	1/100	123/16917	0.518999	0.613363	0.466419	FLNA	1	Astrocyte
CC	GO:0070160	tight junction	1/100	123/16917	0.518999	0.613363	0.466419	GJA1	1	Astrocyte
BP	GO:0030879	mammary gland development	1/100	124/16917	0.521864	0.615531	0.468068	CAV1	1	Astrocyte
BP	GO:0035601	protein deacylation	1/100	124/16917	0.521864	0.615531	0.468068	FLNA	1	Astrocyte
BP	GO:0038127	ERBB signaling pathway	1/100	124/16917	0.521864	0.615531	0.468068	PRICKLE1	1	Astrocyte
BP	GO:0009914	hormone transport	2/100	295/16917	0.522894	0.616342	0.468685	GJA1/EDN1	2	Astrocyte
CC	GO:0005882	intermediate filament	1/100	125/16917	0.524711	0.616868	0.469084	LMNA	1	Astrocyte
BP	GO:0006022	aminoglycan metabolic process	1/100	125/16917	0.524711	0.616868	0.469084	CD44	1	Astrocyte
BP	GO:0006119	oxidative phosphorylation	1/100	125/16917	0.524711	0.616868	0.469084	CHCHD2	1	Astrocyte
BP	GO:0018209	peptidyl-serine modification	2/100	296/16917	0.524716	0.616868	0.469084	CD44/CAV1	2	Astrocyte
BP	GO:0015980	energy derivation by oxidation of organic compounds	2/100	298/16917	0.528345	0.62065	0.471961	PHLDA2/CHCHD2	2	Astrocyte
MF	GO:0016810	hydrolase activity, acting on carbon-nitrogen (but not peptide) bonds	1/100	127/16917	0.530355	0.62065	0.471961	APOBEC3C	1	Astrocyte
BP	GO:0030183	B cell differentiation	1/100	127/16917	0.530355	0.62065	0.471961	LGALS1	1	Astrocyte
BP	GO:0051208	sequestering of calcium ion	1/100	127/16917	0.530355	0.62065	0.471961	FLNA	1	Astrocyte
BP	GO:0055123	digestive system development	1/100	127/16917	0.530355	0.62065	0.471961	TGFB2	1	Astrocyte
BP	GO:0098732	macromolecule deacylation	1/100	127/16917	0.530355	0.62065	0.471961	FLNA	1	Astrocyte
BP	GO:1902600	proton transmembrane transport	1/100	127/16917	0.530355	0.62065	0.471961	ACTN4	1	Astrocyte
CC	GO:0030135	coated vesicle	2/100	300/16917	0.531955	0.621491	0.4726	EDN1/SH3BP4	2	Astrocyte
BP	GO:0046394	carboxylic acid biosynthetic process	2/100	300/16917	0.531955	0.621491	0.4726	EDN1/ELOVL1	2	Astrocyte
BP	GO:0031570	DNA integrity checkpoint signaling	1/100	128/16917	0.533152	0.621491	0.4726	IER3	1	Astrocyte
BP	GO:0035270	endocrine system development	1/100	128/16917	0.533152	0.621491	0.4726	EDN1	1	Astrocyte
BP	GO:0046887	positive regulation of hormone secretion	1/100	128/16917	0.533152	0.621491	0.4726	EDN1	1	Astrocyte
BP	GO:0051147	regulation of muscle cell differentiation	1/100	128/16917	0.533152	0.621491	0.4726	EDN1	1	Astrocyte
BP	GO:0000086	G2/M transition of mitotic cell cycle	1/100	129/16917	0.535933	0.623113	0.473834	IER3	1	Astrocyte
BP	GO:0008277	regulation of G protein-coupled receptor signaling pathway	1/100	129/16917	0.535933	0.623113	0.473834	EDN1	1	Astrocyte
BP	GO:0031929	TOR signaling	1/100	129/16917	0.535933	0.623113	0.473834	SH3BP4	1	Astrocyte
BP	GO:0045598	regulation of fat cell differentiation	1/100	129/16917	0.535933	0.623113	0.473834	TGFB1I1	1	Astrocyte
BP	GO:0016053	organic acid biosynthetic process	2/100	303/16917	0.537336	0.62434	0.474767	EDN1/ELOVL1	2	Astrocyte
BP	GO:0008203	cholesterol metabolic process	1/100	130/16917	0.538697	0.625112	0.475353	LIMA1	1	Astrocyte
BP	GO:0016571	histone methylation	1/100	130/16917	0.538697	0.625112	0.475353	LMNA	1	Astrocyte
BP	GO:0007259	receptor signaling pathway via JAK-STAT	1/100	131/16917	0.541445	0.627084	0.476853	CAV1	1	Astrocyte
BP	GO:0007338	single fertilization	1/100	131/16917	0.541445	0.627084	0.476853	MYH9	1	Astrocyte
BP	GO:0034101	erythrocyte homeostasis	1/100	131/16917	0.541445	0.627084	0.476853	AXL	1	Astrocyte
BP	GO:0051053	negative regulation of DNA metabolic process	1/100	132/16917	0.544177	0.629841	0.47895	ANKRD1	1	Astrocyte
BP	GO:0051223	regulation of protein transport	3/100	486/16917	0.551292	0.637664	0.484899	TGFB2/FLNA/ANKRD1	3	Astrocyte
BP	GO:0006997	nucleus organization	1/100	135/16917	0.552276	0.63798	0.485139	LMNA	1	Astrocyte
BP	GO:0014074	response to purine-containing compound	1/100	135/16917	0.552276	0.63798	0.485139	COL1A1	1	Astrocyte
MF	GO:0061659	ubiquitin-like protein ligase activity	2/100	312/16917	0.553227	0.638667	0.485661	TRIM22/ZBED1	2	Astrocyte
BP	GO:0001889	liver development	1/100	136/16917	0.554944	0.639826	0.486543	CDKN2B	1	Astrocyte
BP	GO:0016579	protein deubiquitination	1/100	136/16917	0.554944	0.639826	0.486543	USP9Y	1	Astrocyte
MF	GO:0004713	protein tyrosine kinase activity	1/100	137/16917	0.557596	0.640825	0.487302	AXL	1	Astrocyte
CC	GO:0005795	Golgi stack	1/100	137/16917	0.557596	0.640825	0.487302	RAB34	1	Astrocyte
BP	GO:0007093	mitotic cell cycle checkpoint signaling	1/100	137/16917	0.557596	0.640825	0.487302	IER3	1	Astrocyte
BP	GO:0050728	negative regulation of inflammatory response	1/100	137/16917	0.557596	0.640825	0.487302	IER3	1	Astrocyte
BP	GO:0097696	receptor signaling pathway via STAT	1/100	137/16917	0.557596	0.640825	0.487302	CAV1	1	Astrocyte
BP	GO:0031056	regulation of histone modification	1/100	138/16917	0.560232	0.64098	0.48742	LMNA	1	Astrocyte
BP	GO:0031333	negative regulation of protein-containing complex assembly	1/100	138/16917	0.560232	0.64098	0.48742	PMEPA1	1	Astrocyte
BP	GO:0035264	multicellular organism growth	1/100	138/16917	0.560232	0.64098	0.48742	PRICKLE1	1	Astrocyte
MF	GO:0045182	translation regulator activity	1/100	138/16917	0.560232	0.64098	0.48742	EIF1AY	1	Astrocyte
BP	GO:0048813	dendrite morphogenesis	1/100	138/16917	0.560232	0.64098	0.48742	SDC2	1	Astrocyte
BP	GO:0061008	hepaticobiliary system development	1/100	138/16917	0.560232	0.64098	0.48742	CDKN2B	1	Astrocyte
BP	GO:1902652	secondary alcohol metabolic process	1/100	138/16917	0.560232	0.64098	0.48742	LIMA1	1	Astrocyte
BP	GO:0031644	regulation of nervous system process	1/100	139/16917	0.562853	0.643568	0.489388	EDN1	1	Astrocyte
BP	GO:0010608	post-transcriptional regulation of gene expression	3/100	495/16917	0.563818	0.644085	0.489781	THBS1/CAV1/PRR16	3	Astrocyte
BP	GO:0051235	maintenance of location	2/100	319/16917	0.565322	0.644085	0.489781	CAV1/FLNA	2	Astrocyte
BP	GO:1901990	regulation of mitotic cell cycle phase transition	2/100	319/16917	0.565322	0.644085	0.489781	CDKN2B/IER3	2	Astrocyte
BP	GO:0006352	DNA-templated transcription initiation	1/100	140/16917	0.565459	0.644085	0.489781	CAVIN1	1	Astrocyte
BP	GO:0006865	amino acid transport	1/100	140/16917	0.565459	0.644085	0.489781	GJA1	1	Astrocyte
MF	GO:0016853	isomerase activity	1/100	140/16917	0.565459	0.644085	0.489781	PPIC	1	Astrocyte
BP	GO:0050768	negative regulation of neurogenesis	1/100	141/16917	0.568049	0.646624	0.491712	CDKN2B	1	Astrocyte
CC	GO:0043296	apical junction complex	1/100	142/16917	0.570624	0.649143	0.493628	FRMD6	1	Astrocyte
BP	GO:0032635	interleukin-6 production	1/100	144/16917	0.575728	0.653706	0.497098	CAPN2	1	Astrocyte
BP	GO:0032675	regulation of interleukin-6 production	1/100	144/16917	0.575728	0.653706	0.497098	CAPN2	1	Astrocyte
BP	GO:0044839	cell cycle G2/M phase transition	1/100	144/16917	0.575728	0.653706	0.497098	IER3	1	Astrocyte
BP	GO:0042886	amide transport	2/100	326/16917	0.577184	0.654507	0.497707	GJA1/EDN1	2	Astrocyte
BP	GO:0098813	nuclear chromosome segregation	2/100	326/16917	0.577184	0.654507	0.497707	PRICKLE1/FLNA	2	Astrocyte
BP	GO:0016125	sterol metabolic process	1/100	145/16917	0.578257	0.654507	0.497707	LIMA1	1	Astrocyte
MF	GO:0016779	nucleotidyltransferase activity	1/100	145/16917	0.578257	0.654507	0.497707	POLR2L	1	Astrocyte
BP	GO:0044272	sulfur compound biosynthetic process	1/100	145/16917	0.578257	0.654507	0.497707	ELOVL1	1	Astrocyte
BP	GO:0120254	olefinic compound metabolic process	1/100	146/16917	0.580772	0.656939	0.499556	ELOVL1	1	Astrocyte
BP	GO:0010976	positive regulation of neuron projection development	1/100	147/16917	0.583272	0.658521	0.500759	FLNA	1	Astrocyte
BP	GO:0051961	negative regulation of nervous system development	1/100	147/16917	0.583272	0.658521	0.500759	CDKN2B	1	Astrocyte
BP	GO:0098876	vesicle-mediated transport to the plasma membrane	1/100	147/16917	0.583272	0.658521	0.500759	RAB34	1	Astrocyte
BP	GO:0048639	positive regulation of developmental growth	1/100	148/16917	0.585757	0.66091	0.502576	EDN1	1	Astrocyte
BP	GO:0090316	positive regulation of intracellular protein transport	1/100	149/16917	0.588227	0.66328	0.504378	FLNA	1	Astrocyte
MF	GO:0004386	helicase activity	1/100	150/16917	0.590683	0.665213	0.505848	DDX3Y	1	Astrocyte
BP	GO:0009411	response to UV	1/100	150/16917	0.590683	0.665213	0.505848	MMP2	1	Astrocyte
BP	GO:0051250	negative regulation of lymphocyte activation	1/100	151/16917	0.593124	0.667543	0.50762	AXL	1	Astrocyte
BP	GO:0031346	positive regulation of cell projection organization	2/100	337/16917	0.595349	0.668597	0.508421	CDC42EP1/FLNA	2	Astrocyte
CC	GO:0043204	perikaryon	1/100	152/16917	0.595551	0.668597	0.508421	FLNA	1	Astrocyte
BP	GO:0051494	negative regulation of cytoskeleton organization	1/100	152/16917	0.595551	0.668597	0.508421	LIMA1	1	Astrocyte
BP	GO:1905039	carboxylic acid transmembrane transport	1/100	152/16917	0.595551	0.668597	0.508421	THBS1	1	Astrocyte
CC	GO:0070820	tertiary granule	1/100	153/16917	0.597963	0.670047	0.509524	PLAU	1	Astrocyte
BP	GO:1902904	negative regulation of supramolecular fiber organization	1/100	153/16917	0.597963	0.670047	0.509524	LIMA1	1	Astrocyte
BP	GO:1903825	organic acid transmembrane transport	1/100	153/16917	0.597963	0.670047	0.509524	THBS1	1	Astrocyte
BP	GO:0070646	protein modification by small protein removal	1/100	154/16917	0.600361	0.672315	0.511248	USP9Y	1	Astrocyte
BP	GO:0051100	negative regulation of binding	1/100	156/16917	0.605115	0.677216	0.514975	CAV1	1	Astrocyte
BP	GO:0050863	regulation of T cell activation	2/100	344/16917	0.606607	0.678462	0.515922	LGALS1/CAV1	2	Astrocyte
BP	GO:2000045	regulation of G1/S transition of mitotic cell cycle	1/100	157/16917	0.607471	0.679005	0.516336	CDKN2B	1	Astrocyte
BP	GO:0002697	regulation of immune effector process	2/100	347/16917	0.611359	0.682926	0.519317	AXL/TGFB2	2	Astrocyte
BP	GO:0050731	positive regulation of peptidyl-tyrosine phosphorylation	1/100	160/16917	0.614456	0.685958	0.521623	CD44	1	Astrocyte
BP	GO:0043409	negative regulation of MAPK cascade	1/100	161/16917	0.616757	0.688098	0.52325	CAV1	1	Astrocyte
BP	GO:0002262	myeloid cell homeostasis	1/100	162/16917	0.619044	0.689792	0.524538	AXL	1	Astrocyte
CC	GO:0045111	intermediate filament cytoskeleton	1/100	162/16917	0.619044	0.689792	0.524538	LMNA	1	Astrocyte
BP	GO:0007156	homophilic cell adhesion via plasma membrane adhesion molecules	1/100	163/16917	0.621318	0.691467	0.525812	PALLD	1	Astrocyte
BP	GO:0043433	negative regulation of DNA-binding transcription factor activity	1/100	163/16917	0.621318	0.691467	0.525812	FLNA	1	Astrocyte
MF	GO:0033218	amide binding	2/100	354/16917	0.622281	0.692109	0.5263	PPIC/TGFB2	2	Astrocyte
BP	GO:2001022	positive regulation of response to DNA damage stimulus	1/100	164/16917	0.623578	0.692964	0.52695	ANKRD1	1	Astrocyte
BP	GO:0051098	regulation of binding	2/100	355/16917	0.623822	0.692964	0.52695	CAV1/PHLDA2	2	Astrocyte
BP	GO:0045786	negative regulation of cell cycle	2/100	359/16917	0.629938	0.697976	0.530761	CDKN2B/IER3	2	Astrocyte
BP	GO:0021953	central nervous system neuron differentiation	1/100	167/16917	0.630279	0.697976	0.530761	SPOCK1	1	Astrocyte
BP	GO:1902107	positive regulation of leukocyte differentiation	1/100	167/16917	0.630279	0.697976	0.530761	AXL	1	Astrocyte
BP	GO:1903169	regulation of calcium ion transmembrane transport	1/100	167/16917	0.630279	0.697976	0.530761	CAV1	1	Astrocyte
BP	GO:1903708	positive regulation of hemopoiesis	1/100	167/16917	0.630279	0.697976	0.530761	AXL	1	Astrocyte
BP	GO:0009566	fertilization	1/100	168/16917	0.632486	0.699125	0.531635	MYH9	1	Astrocyte
BP	GO:0040029	epigenetic regulation of gene expression	1/100	168/16917	0.632486	0.699125	0.531635	LMNA	1	Astrocyte
BP	GO:0051302	regulation of cell division	1/100	168/16917	0.632486	0.699125	0.531635	TGFB2	1	Astrocyte
BP	GO:0046486	glycerolipid metabolic process	2/100	361/16917	0.632967	0.699226	0.531712	CAV1/CAPN2	2	Astrocyte
BP	GO:0007219	Notch signaling pathway	1/100	169/16917	0.63468	0.700256	0.532496	TGFB2	1	Astrocyte
BP	GO:0051099	positive regulation of binding	1/100	169/16917	0.63468	0.700256	0.532496	CAV1	1	Astrocyte
BP	GO:0019827	stem cell population maintenance	1/100	171/16917	0.63903	0.704622	0.535815	LOXL2	1	Astrocyte
BP	GO:0009060	aerobic respiration	1/100	172/16917	0.641186	0.704833	0.535976	CHCHD2	1	Astrocyte
BP	GO:0009266	response to temperature stimulus	1/100	172/16917	0.641186	0.704833	0.535976	THBS1	1	Astrocyte
BP	GO:0009451	RNA modification	1/100	172/16917	0.641186	0.704833	0.535976	APOBEC3C	1	Astrocyte
BP	GO:0009952	anterior/posterior pattern specification	1/100	172/16917	0.641186	0.704833	0.535976	PRICKLE1	1	Astrocyte
BP	GO:0035725	sodium ion transmembrane transport	1/100	172/16917	0.641186	0.704833	0.535976	ACTN4	1	Astrocyte
CC	GO:0043197	dendritic spine	1/100	174/16917	0.645459	0.709095	0.539217	ACTN1	1	Astrocyte
BP	GO:0002285	lymphocyte activation involved in immune response	1/100	175/16917	0.647576	0.710117	0.539994	LGALS1	1	Astrocyte
CC	GO:0072686	mitotic spindle	1/100	175/16917	0.647576	0.710117	0.539994	TUBB6	1	Astrocyte
BP	GO:0098727	maintenance of cell number	1/100	175/16917	0.647576	0.710117	0.539994	LOXL2	1	Astrocyte
BP	GO:0006006	glucose metabolic process	1/100	176/16917	0.649681	0.71199	0.541418	IGFBP3	1	Astrocyte
CC	GO:0044309	neuron spine	1/100	177/16917	0.651774	0.713412	0.542499	ACTN1	1	Astrocyte
CC	GO:0101002	ficolin-1-rich granule	1/100	177/16917	0.651774	0.713412	0.542499	VCL	1	Astrocyte
BP	GO:0003002	regionalization	2/100	374/16917	0.652194	0.713436	0.542518	PRICKLE1/EDN1	2	Astrocyte
MF	GO:0019887	protein kinase regulator activity	1/100	178/16917	0.653854	0.713512	0.542576	PARVA	1	Astrocyte
BP	GO:0031503	protein-containing complex localization	1/100	178/16917	0.653854	0.713512	0.542576	LMNA	1	Astrocyte
BP	GO:0046578	regulation of Ras protein signal transduction	1/100	178/16917	0.653854	0.713512	0.542576	TGFB2	1	Astrocyte
BP	GO:0048839	inner ear development	1/100	178/16917	0.653854	0.713512	0.542576	TGFB2	1	Astrocyte
MF	GO:0140098	catalytic activity, acting on RNA	2/100	376/16917	0.65508	0.714031	0.542971	POLR2L/DDX3Y	2	Astrocyte
BP	GO:0006479	protein methylation	1/100	179/16917	0.655922	0.714031	0.542971	LMNA	1	Astrocyte
BP	GO:0008213	protein alkylation	1/100	179/16917	0.655922	0.714031	0.542971	LMNA	1	Astrocyte
BP	GO:0099173	postsynapse organization	1/100	179/16917	0.655922	0.714031	0.542971	ACTN1	1	Astrocyte
BP	GO:0002221	pattern recognition receptor signaling pathway	1/100	180/16917	0.657978	0.715401	0.544012	CAV1	1	Astrocyte
BP	GO:0021543	pallium development	1/100	180/16917	0.657978	0.715401	0.544012	ANXA3	1	Astrocyte
BP	GO:1902806	regulation of cell cycle G1/S phase transition	1/100	181/16917	0.660021	0.717188	0.545371	CDKN2B	1	Astrocyte
BP	GO:0002695	negative regulation of leukocyte activation	1/100	182/16917	0.662052	0.718525	0.546388	AXL	1	Astrocyte
BP	GO:0071478	cellular response to radiation	1/100	182/16917	0.662052	0.718525	0.546388	MMP2	1	Astrocyte
BP	GO:0000075	cell cycle checkpoint signaling	1/100	183/16917	0.664072	0.719846	0.547392	IER3	1	Astrocyte
MF	GO:0019902	phosphatase binding	1/100	183/16917	0.664072	0.719846	0.547392	SYTL2	1	Astrocyte
BP	GO:0030900	forebrain development	2/100	387/16917	0.670621	0.726507	0.552457	AXL/ANXA3	2	Astrocyte
BP	GO:0006399	tRNA metabolic process	1/100	190/16917	0.677877	0.733924	0.558097	POLR2L	1	Astrocyte
BP	GO:0006417	regulation of translation	2/100	396/16917	0.682917	0.738359	0.56147	THBS1/PRR16	2	Astrocyte
BP	GO:0045619	regulation of lymphocyte differentiation	1/100	193/16917	0.68362	0.738359	0.56147	AXL	1	Astrocyte
BP	GO:0051650	establishment of vesicle localization	1/100	193/16917	0.68362	0.738359	0.56147	ACTN4	1	Astrocyte
CC	GO:0055037	recycling endosome	1/100	193/16917	0.68362	0.738359	0.56147	BOK	1	Astrocyte
BP	GO:0002758	innate immune response-activating signaling pathway	1/100	194/16917	0.685512	0.739957	0.562685	CAV1	1	Astrocyte
MF	GO:0005126	cytokine receptor binding	1/100	195/16917	0.687393	0.741541	0.56389	TGFB2	1	Astrocyte
BP	GO:0006457	protein folding	1/100	197/16917	0.69112	0.745114	0.566607	PPIC	1	Astrocyte
BP	GO:0009152	purine ribonucleotide biosynthetic process	1/100	199/16917	0.694804	0.747738	0.568602	ELOVL1	1	Astrocyte
BP	GO:0032869	cellular response to insulin stimulus	1/100	199/16917	0.694804	0.747738	0.568602	CAV2	1	Astrocyte
BP	GO:0042098	T cell proliferation	1/100	199/16917	0.694804	0.747738	0.568602	MSN	1	Astrocyte
CC	GO:0016607	nuclear speck	2/100	407/16917	0.69744	0.750124	0.570416	LMNA/TRIM22	2	Astrocyte
BP	GO:0098739	import across plasma membrane	1/100	201/16917	0.698445	0.750305	0.570554	THBS1	1	Astrocyte
BP	GO:1902115	regulation of organelle assembly	1/100	201/16917	0.698445	0.750305	0.570554	MSN	1	Astrocyte
BP	GO:0002573	myeloid leukocyte differentiation	1/100	202/16917	0.700249	0.751343	0.571344	MYH9	1	Astrocyte
CC	GO:0005741	mitochondrial outer membrane	1/100	202/16917	0.700249	0.751343	0.571344	BOK	1	Astrocyte
MF	GO:0019207	kinase regulator activity	1/100	203/16917	0.702042	0.752817	0.572464	PARVA	1	Astrocyte
CC	GO:0005819	spindle	2/100	411/16917	0.702584	0.752949	0.572564	MYH9/TUBB6	2	Astrocyte
BP	GO:0050866	negative regulation of cell activation	1/100	204/16917	0.703824	0.752966	0.572577	AXL	1	Astrocyte
BP	GO:0007389	pattern specification process	2/100	412/16917	0.703859	0.752966	0.572577	PRICKLE1/EDN1	2	Astrocyte
BP	GO:1901987	regulation of cell cycle phase transition	2/100	412/16917	0.703859	0.752966	0.572577	CDKN2B/IER3	2	Astrocyte
BP	GO:0046474	glycerophospholipid biosynthetic process	1/100	207/16917	0.709109	0.75813	0.576505	CAPN2	1	Astrocyte
BP	GO:0007059	chromosome segregation	2/100	417/16917	0.710167	0.758808	0.57702	PRICKLE1/FLNA	2	Astrocyte
BP	GO:0006282	regulation of DNA repair	1/100	210/16917	0.714301	0.762771	0.580034	IER3	1	Astrocyte
BP	GO:0051648	vesicle localization	1/100	211/16917	0.716011	0.764143	0.581077	ACTN4	1	Astrocyte
BP	GO:0007033	vacuole organization	1/100	212/16917	0.717711	0.765047	0.581764	RAB34	1	Astrocyte
BP	GO:0009260	ribonucleotide biosynthetic process	1/100	212/16917	0.717711	0.765047	0.581764	ELOVL1	1	Astrocyte
BP	GO:0009636	response to toxic substance	1/100	213/16917	0.719401	0.765938	0.582442	NQO1	1	Astrocyte
MF	GO:0016747	acyltransferase activity, transferring groups other than amino-acyl groups	1/100	213/16917	0.719401	0.765938	0.582442	ELOVL1	1	Astrocyte
BP	GO:0019318	hexose metabolic process	1/100	215/16917	0.722751	0.768592	0.58446	IGFBP3	1	Astrocyte
BP	GO:0045333	cellular respiration	1/100	215/16917	0.722751	0.768592	0.58446	CHCHD2	1	Astrocyte
BP	GO:0044772	mitotic cell cycle phase transition	2/100	429/16917	0.724853	0.770371	0.585813	CDKN2B/IER3	2	Astrocyte
BP	GO:0002218	activation of innate immune response	1/100	217/16917	0.726061	0.771198	0.586441	CAV1	1	Astrocyte
BP	GO:0033157	regulation of intracellular protein transport	1/100	218/16917	0.727701	0.772026	0.587071	FLNA	1	Astrocyte
BP	GO:0046390	ribose phosphate biosynthetic process	1/100	218/16917	0.727701	0.772026	0.587071	ELOVL1	1	Astrocyte
CC	GO:0070382	exocytic vesicle	1/100	219/16917	0.729332	0.773135	0.587915	SYTL2	1	Astrocyte
BP	GO:0043161	proteasome-mediated ubiquitin-dependent protein catabolic process	2/100	433/16917	0.729608	0.773135	0.587915	PRICKLE1/CAV1	2	Astrocyte
BP	GO:0000082	G1/S transition of mitotic cell cycle	1/100	221/16917	0.732564	0.775809	0.589948	CDKN2B	1	Astrocyte
MF	GO:0019787	ubiquitin-like protein transferase activity	2/100	436/16917	0.73313	0.77595	0.590055	TRIM22/ZBED1	2	Astrocyte
BP	GO:0030072	peptide hormone secretion	1/100	222/16917	0.734166	0.776588	0.59054	EDN1	1	Astrocyte
BP	GO:0046777	protein autophosphorylation	1/100	224/16917	0.737341	0.779487	0.592745	CAV1	1	Astrocyte
BP	GO:0002790	peptide secretion	1/100	226/16917	0.740479	0.782343	0.594917	EDN1	1	Astrocyte
BP	GO:0045444	fat cell differentiation	1/100	227/16917	0.742033	0.783063	0.595465	TGFB1I1	1	Astrocyte
BP	GO:0097305	response to alcohol	1/100	227/16917	0.742033	0.783063	0.595465	NQO1	1	Astrocyte
BP	GO:0031348	negative regulation of defense response	1/100	228/16917	0.743579	0.783772	0.596004	IER3	1	Astrocyte
BP	GO:1901617	organic hydroxy compound biosynthetic process	1/100	228/16917	0.743579	0.783772	0.596004	TGFB2	1	Astrocyte
BP	GO:0023061	signal release	2/100	446/16917	0.744591	0.784379	0.596465	GJA1/EDN1	2	Astrocyte
CC	GO:0031968	organelle outer membrane	1/100	229/16917	0.745115	0.78447	0.596534	BOK	1	Astrocyte
CC	GO:0005874	microtubule	2/100	448/16917	0.746833	0.785817	0.597559	TUBB6/RASSF3	2	Astrocyte
CC	GO:0019867	outer membrane	1/100	231/16917	0.748161	0.786753	0.59827	BOK	1	Astrocyte
CC	GO:0090575	RNA polymerase II transcription regulator complex	1/100	235/16917	0.754145	0.792581	0.602702	FOSL2	1	Astrocyte
MF	GO:0016746	acyltransferase activity	1/100	238/16917	0.75854	0.796733	0.60586	ELOVL1	1	Astrocyte
BP	GO:0042113	B cell activation	1/100	239/16917	0.759988	0.797787	0.606661	LGALS1	1	Astrocyte
BP	GO:0045017	glycerolipid biosynthetic process	1/100	240/16917	0.761427	0.798363	0.607099	CAPN2	1	Astrocyte
BP	GO:0051924	regulation of calcium ion transport	1/100	240/16917	0.761427	0.798363	0.607099	CAV1	1	Astrocyte
BP	GO:0006164	purine nucleotide biosynthetic process	1/100	242/16917	0.764279	0.800419	0.608662	ELOVL1	1	Astrocyte
BP	GO:0015833	peptide transport	1/100	242/16917	0.764279	0.800419	0.608662	EDN1	1	Astrocyte
BP	GO:0005996	monosaccharide metabolic process	1/100	243/16917	0.765693	0.800964	0.609077	IGFBP3	1	Astrocyte
BP	GO:0051259	protein complex oligomerization	1/100	243/16917	0.765693	0.800964	0.609077	BOK	1	Astrocyte
BP	GO:0016570	histone modification	2/100	466/16917	0.766267	0.801097	0.609178	LMNA/KDM5D	2	Astrocyte
BP	GO:0044843	cell cycle G1/S phase transition	1/100	247/16917	0.771264	0.80556	0.612571	CDKN2B	1	Astrocyte
BP	GO:2000112	regulation of cellular macromolecule biosynthetic process	2/100	471/16917	0.771433	0.80556	0.612571	THBS1/PRR16	2	Astrocyte
BP	GO:0008654	phospholipid biosynthetic process	1/100	249/16917	0.774	0.80777	0.614252	CAPN2	1	Astrocyte
BP	GO:0016072	rRNA metabolic process	1/100	250/16917	0.775356	0.808714	0.61497	CAVIN1	1	Astrocyte
BP	GO:0072522	purine-containing compound biosynthetic process	1/100	251/16917	0.776704	0.809649	0.615681	ELOVL1	1	Astrocyte
BP	GO:0090596	sensory organ morphogenesis	1/100	252/16917	0.778044	0.810575	0.616385	EDN1	1	Astrocyte
BP	GO:0098657	import into cell	1/100	253/16917	0.779375	0.811491	0.617082	THBS1	1	Astrocyte
BP	GO:0010721	negative regulation of cell development	1/100	255/16917	0.782016	0.813768	0.618813	CDKN2B	1	Astrocyte
BP	GO:0002449	lymphocyte mediated immunity	1/100	262/16917	0.791012	0.822652	0.625569	KDM5D	1	Astrocyte
BP	GO:0021537	telencephalon development	1/100	264/16917	0.793514	0.824751	0.627165	ANXA3	1	Astrocyte
BP	GO:0010817	regulation of hormone levels	2/100	494/16917	0.793949	0.824751	0.627165	GJA1/EDN1	2	Astrocyte
BP	GO:0010498	proteasomal protein catabolic process	2/100	497/16917	0.796739	0.82717	0.629005	PRICKLE1/CAV1	2	Astrocyte
BP	GO:0046651	lymphocyte proliferation	1/100	267/16917	0.797212	0.827182	0.629014	MSN	1	Astrocyte
BP	GO:0006260	DNA replication	1/100	272/16917	0.803229	0.832944	0.633395	RBMS1	1	Astrocyte
BP	GO:0009165	nucleotide biosynthetic process	1/100	273/16917	0.804412	0.833688	0.633961	ELOVL1	1	Astrocyte
BP	GO:0032943	mononuclear cell proliferation	1/100	274/16917	0.805587	0.834424	0.634521	MSN	1	Astrocyte
BP	GO:1901293	nucleoside phosphate biosynthetic process	1/100	275/16917	0.806755	0.835152	0.635074	ELOVL1	1	Astrocyte
BP	GO:0030217	T cell differentiation	1/100	278/16917	0.810218	0.838253	0.637432	RUNX2	1	Astrocyte
BP	GO:0002460	adaptive immune response based on somatic recombination of immune receptors built from immunoglobulin superfamily domains	1/100	280/16917	0.812492	0.839638	0.638485	KDM5D	1	Astrocyte
BP	GO:0045089	positive regulation of innate immune response	1/100	280/16917	0.812492	0.839638	0.638485	CAV1	1	Astrocyte
BP	GO:0007281	germ cell development	1/100	281/16917	0.813619	0.840318	0.639003	EDN1	1	Astrocyte
MF	GO:0001227	DNA-binding transcription repressor activity, RNA polymerase II-specific	1/100	282/16917	0.81474	0.840991	0.639515	ELK3	1	Astrocyte
BP	GO:1902105	regulation of leukocyte differentiation	1/100	283/16917	0.815853	0.841656	0.64002	AXL	1	Astrocyte
CC	GO:0061695	transferase complex, transferring phosphorus-containing groups	1/100	284/16917	0.81696	0.842314	0.640521	POLR2L	1	Astrocyte
MF	GO:0001217	DNA-binding transcription repressor activity	1/100	287/16917	0.820242	0.844242	0.641987	ELK3	1	Astrocyte
BP	GO:0006650	glycerophospholipid metabolic process	1/100	287/16917	0.820242	0.844242	0.641987	CAPN2	1	Astrocyte
BP	GO:0048193	Golgi vesicle transport	1/100	287/16917	0.820242	0.844242	0.641987	RAB34	1	Astrocyte
BP	GO:0051056	regulation of small GTPase mediated signal transduction	1/100	292/16917	0.825583	0.849252	0.645796	TGFB2	1	Astrocyte
BP	GO:0008202	steroid metabolic process	1/100	294/16917	0.827675	0.850429	0.646691	LIMA1	1	Astrocyte
BP	GO:0051054	positive regulation of DNA metabolic process	1/100	294/16917	0.827675	0.850429	0.646691	ANXA3	1	Astrocyte
MF	GO:0003729	mRNA binding	1/100	297/16917	0.830766	0.853117	0.648735	RBMS1	1	Astrocyte
MF	GO:0061630	ubiquitin protein ligase activity	1/100	298/16917	0.831784	0.853248	0.648835	TRIM22	1	Astrocyte
BP	GO:0001822	kidney development	1/100	299/16917	0.832797	0.853248	0.648835	TGFB2	1	Astrocyte
BP	GO:0006790	sulfur compound metabolic process	1/100	299/16917	0.832797	0.853248	0.648835	ELOVL1	1	Astrocyte
BP	GO:0048638	regulation of developmental growth	1/100	299/16917	0.832797	0.853248	0.648835	EDN1	1	Astrocyte
BP	GO:0002833	positive regulation of response to biotic stimulus	1/100	301/16917	0.834803	0.854815	0.650027	CAV1	1	Astrocyte
BP	GO:0070661	leukocyte proliferation	1/100	305/16917	0.838744	0.858361	0.652723	MSN	1	Astrocyte
BP	GO:0009416	response to light stimulus	1/100	306/16917	0.839715	0.858865	0.653106	MMP2	1	Astrocyte
BP	GO:0043414	macromolecule methylation	1/100	307/16917	0.84068	0.859362	0.653484	LMNA	1	Astrocyte
BP	GO:0006605	protein targeting	1/100	317/16917	0.850019	0.868413	0.660367	TRAM2	1	Astrocyte
BP	GO:0016311	dephosphorylation	1/100	327/16917	0.858815	0.8769	0.666821	TGFB2	1	Astrocyte
CC	GO:0014069	postsynaptic density	1/100	336/16917	0.866294	0.884034	0.672245	SPOCK1	1	Astrocyte
BP	GO:0006066	alcohol metabolic process	1/100	340/16917	0.869491	0.886791	0.674342	LIMA1	1	Astrocyte
BP	GO:0032259	methylation	1/100	346/16917	0.874144	0.890525	0.677182	LMNA	1	Astrocyte
BP	GO:0045088	regulation of innate immune response	1/100	346/16917	0.874144	0.890525	0.677182	CAV1	1	Astrocyte
MF	GO:0042578	phosphoric ester hydrolase activity	1/100	347/16917	0.874904	0.890793	0.677385	PDE1C	1	Astrocyte
CC	GO:0032279	asymmetric synapse	1/100	350/16917	0.877155	0.892579	0.678743	SPOCK1	1	Astrocyte
BP	GO:0050767	regulation of neurogenesis	1/100	358/16917	0.882965	0.897981	0.682851	CDKN2B	1	Astrocyte
BP	GO:0006644	phospholipid metabolic process	1/100	359/16917	0.883671	0.898191	0.683011	CAPN2	1	Astrocyte
CC	GO:0099572	postsynaptic specialization	1/100	361/16917	0.885072	0.899105	0.683706	SPOCK1	1	Astrocyte
MF	GO:0016887	ATP hydrolysis activity	1/100	362/16917	0.885766	0.899301	0.683855	DDX3Y	1	Astrocyte
MF	GO:0015631	tubulin binding	1/100	365/16917	0.887824	0.90088	0.685056	GJA1	1	Astrocyte
BP	GO:1903706	regulation of hemopoiesis	1/100	371/16917	0.89183	0.904434	0.687758	AXL	1	Astrocyte
BP	GO:0002757	immune response-activating signaling pathway	1/100	372/16917	0.892484	0.904585	0.687873	CAV1	1	Astrocyte
BP	GO:0044282	small molecule catabolic process	1/100	373/16917	0.893134	0.904733	0.687986	APOBEC3C	1	Astrocyte
CC	GO:0098984	neuron to neuron synapse	1/100	378/16917	0.896325	0.907453	0.690054	SPOCK1	1	Astrocyte
BP	GO:0022412	cellular process involved in reproduction in multicellular organism	1/100	384/16917	0.90003	0.910691	0.692516	EDN1	1	Astrocyte
BP	GO:0002764	immune response-regulating signaling pathway	1/100	394/16917	0.905917	0.91613	0.696652	CAV1	1	Astrocyte
BP	GO:0034655	nucleobase-containing compound catabolic process	1/100	395/16917	0.906486	0.916189	0.696697	APOBEC3C	1	Astrocyte
BP	GO:0002250	adaptive immune response	1/100	398/16917	0.908174	0.917378	0.697602	KDM5D	1	Astrocyte
BP	GO:0010720	positive regulation of cell development	1/100	402/16917	0.910377	0.919087	0.698901	AXL	1	Astrocyte
MF	GO:0004842	ubiquitin-protein transferase activity	1/100	407/16917	0.913058	0.920757	0.700171	TRIM22	1	Astrocyte
CC	GO:0098978	glutamatergic synapse	1/100	407/16917	0.913058	0.920757	0.700171	ACTN1	1	Astrocyte
BP	GO:0002831	regulation of response to biotic stimulus	1/100	425/16917	0.922069	0.929321	0.706683	CAV1	1	Astrocyte
BP	GO:0009314	response to radiation	1/100	430/16917	0.924404	0.931151	0.708075	MMP2	1	Astrocyte
BP	GO:0044270	cellular nitrogen compound catabolic process	1/100	432/16917	0.925318	0.931341	0.708219	APOBEC3C	1	Astrocyte
BP	GO:0051960	regulation of nervous system development	1/100	433/16917	0.925771	0.931341	0.708219	CDKN2B	1	Astrocyte
BP	GO:0046700	heterocycle catabolic process	1/100	434/16917	0.926221	0.931341	0.708219	APOBEC3C	1	Astrocyte
BP	GO:0002253	activation of immune response	1/100	435/16917	0.926669	0.931341	0.708219	CAV1	1	Astrocyte
MF	GO:0015267	channel activity	1/100	447/16917	0.931835	0.935377	0.711288	GJA1	1	Astrocyte
BP	GO:0019439	aromatic compound catabolic process	1/100	448/16917	0.932249	0.935377	0.711288	APOBEC3C	1	Astrocyte
MF	GO:0022803	passive transmembrane transporter activity	1/100	448/16917	0.932249	0.935377	0.711288	GJA1	1	Astrocyte
BP	GO:0050804	modulation of chemical synaptic transmission	1/100	452/16917	0.93388	0.936369	0.712043	EDN1	1	Astrocyte
BP	GO:0099177	regulation of trans-synaptic signaling	1/100	453/16917	0.934281	0.936369	0.712043	EDN1	1	Astrocyte
CC	GO:0005743	mitochondrial inner membrane	1/100	464/16917	0.938542	0.940114	0.714891	BOK	1	Astrocyte
MF	GO:0030695	GTPase regulator activity	1/100	477/16917	0.943227	0.943572	0.71752	SH3BP4	1	Astrocyte
MF	GO:0060589	nucleoside-triphosphatase regulator activity	1/100	477/16917	0.943227	0.943572	0.71752	SH3BP4	1	Astrocyte
BP	GO:1901361	organic cyclic compound catabolic process	1/100	478/16917	0.943572	0.943572	0.71752	APOBEC3C	1	Astrocyte
CC	GO:0150034	distal axon	23/192	271/16917	5.7684e-14	1.22752e-10	1.02374e-10	GAP43/OLFM1/STMN2/STMN4/GPM6A/ENO2/MAPT/RAB3A/GAD1/ELAVL4/KIF5C/RUFY3/SNAP25/CXADR/NRSN1/KIF21B/ATCAY/NTRK2/CDK5R1/KLC1/SLC32A1/COPG2/UNC13A	23	Neuron
CC	GO:0030426	growth cone	18/192	166/16917	5.56623e-13	5.92247e-10	4.93929e-10	GAP43/OLFM1/STMN2/STMN4/GPM6A/ENO2/MAPT/ELAVL4/KIF5C/RUFY3/SNAP25/CXADR/NRSN1/KIF21B/ATCAY/CDK5R1/KLC1/COPG2	18	Neuron
CC	GO:0030427	site of polarized growth	18/192	171/16917	9.30588e-13	6.60097e-10	5.50517e-10	GAP43/OLFM1/STMN2/STMN4/GPM6A/ENO2/MAPT/ELAVL4/KIF5C/RUFY3/SNAP25/CXADR/NRSN1/KIF21B/ATCAY/CDK5R1/KLC1/COPG2	18	Neuron
BP	GO:0007416	synapse assembly	17/192	189/16917	5.15738e-11	2.5641e-08	2.13844e-08	GAP43/GPM6A/SLIT1/NRXN1/DNER/PCLO/NTRK2/EFNB3/EFNA5/NEGR1/NRXN2/SLITRK2/GABRA2/GABRG2/SLITRK4/SPOCK2/EPHB1	17	Neuron
BP	GO:0050808	synapse organization	25/192	452/16917	6.02466e-11	2.5641e-08	2.13844e-08	GAP43/INA/GPM6A/MAPT/RAB3A/SLIT1/NRXN1/SEZ6L/DNER/PCLO/NTRK2/CDK5R1/BCAN/EFNB3/EFNA5/NEGR1/NRXN2/SLITRK2/GABRA2/GABRG2/SLITRK4/SPOCK2/UNC13A/EPHB1/SPARCL1	25	Neuron
CC	GO:0043025	neuronal cell body	25/192	489/16917	3.16614e-10	1.12292e-07	9.3651e-08	RTN1/GAP43/OLFM1/STMN2/GPM6A/ENO2/GRIA2/KIF5A/MAPT/ELAVL4/KIF5C/RUFY3/SYT4/NRSN1/NRXN1/SEZ6L/DNER/SST/CDK5R1/INPP5F/GABBR1/NEGR1/GABRA2/CD200/ATP1A2	25	Neuron
BP	GO:0061564	axon development	24/192	463/16917	5.59737e-10	1.7016e-07	1.41912e-07	NKX2-1/GAP43/OLFM1/KIF5A/MAPT/RAB3A/KIF5C/RUFY3/NCAM1/SLIT1/NRXN1/NTRK2/CDK5R1/DLX5/INPP5F/SHH/EFNB3/EFNA5/NREP/SLITRK2/SLITRK4/STXBP1/VEGFA/EPHB1	24	Neuron
BP	GO:0001505	regulation of neurotransmitter levels	16/192	204/16917	1.47688e-09	3.9285e-07	3.27634e-07	RAB3A/GAD1/VAMP2/SNAP25/SYT4/NRXN1/PCLO/RAB3B/NRXN2/NAPB/GABRA2/SLC32A1/STXBP1/UNC13A/PREPL/ATP1A2	16	Neuron
BP	GO:0007409	axonogenesis	22/192	416/16917	2.13508e-09	5.04828e-07	4.21023e-07	NKX2-1/GAP43/OLFM1/KIF5A/MAPT/RAB3A/KIF5C/RUFY3/NCAM1/SLIT1/NRXN1/NTRK2/CDK5R1/DLX5/SHH/EFNB3/EFNA5/SLITRK2/SLITRK4/STXBP1/VEGFA/EPHB1	22	Neuron
CC	GO:0098982	GABA-ergic synapse	11/192	83/16917	2.3943e-09	5.09508e-07	4.24926e-07	GAP43/GAD1/SST/PCLO/GABBR1/EFNA5/GABRA3/SLITRK2/GABRA2/SLC32A1/GABRG2	11	Neuron
BP	GO:0034329	cell junction assembly	22/192	423/16917	2.90517e-09	5.62017e-07	4.68719e-07	GAP43/GPM6A/SLIT1/NRXN1/DNER/PCLO/NTRK2/CLASP2/EFNB3/DMTN/EFNA5/NEGR1/NRXN2/SLITRK2/GABRA2/GABRG2/SLITRK4/SPOCK2/VEGFA/EPHB1/AGT/ANK2	22	Neuron
BP	GO:0006836	neurotransmitter transport	15/192	196/16917	6.85254e-09	1.21518e-06	1.01345e-06	RAB3A/VAMP2/SNAP25/SYT4/NRXN1/PCLO/RAB3B/NRXN2/NAPB/GABRA2/SLC32A1/STXBP1/UNC13A/PREPL/ATP1A2	15	Neuron
BP	GO:0099003	vesicle-mediated transport in synapse	15/192	216/16917	2.54412e-08	4.16453e-06	3.47319e-06	NSG1/RAB3A/VAMP2/SNAP25/SYT4/PCLO/RAB3B/CDK5R1/ATP6V1G2/SNAP91/NAPB/SLC32A1/STXBP1/UNC13A/PREPL	15	Neuron
BP	GO:0007269	neurotransmitter secretion	12/192	135/16917	4.43342e-08	6.20279e-06	5.17308e-06	RAB3A/VAMP2/SNAP25/SYT4/NRXN1/PCLO/NRXN2/NAPB/SLC32A1/STXBP1/UNC13A/PREPL	12	Neuron
BP	GO:0099643	signal release from synapse	12/192	135/16917	4.43342e-08	6.20279e-06	5.17308e-06	RAB3A/VAMP2/SNAP25/SYT4/NRXN1/PCLO/NRXN2/NAPB/SLC32A1/STXBP1/UNC13A/PREPL	12	Neuron
BP	GO:0099504	synaptic vesicle cycle	14/192	194/16917	4.66375e-08	6.20279e-06	5.17308e-06	RAB3A/VAMP2/SNAP25/SYT4/PCLO/RAB3B/CDK5R1/ATP6V1G2/SNAP91/NAPB/SLC32A1/STXBP1/UNC13A/PREPL	14	Neuron
BP	GO:0007411	axon guidance	14/192	216/16917	1.77463e-07	2.02805e-05	1.69138e-05	NKX2-1/GAP43/KIF5A/KIF5C/NCAM1/SLIT1/NRXN1/CDK5R1/DLX5/SHH/EFNB3/EFNA5/VEGFA/EPHB1	14	Neuron
BP	GO:0097485	neuron projection guidance	14/192	216/16917	1.77463e-07	2.02805e-05	1.69138e-05	NKX2-1/GAP43/KIF5A/KIF5C/NCAM1/SLIT1/NRXN1/CDK5R1/DLX5/SHH/EFNB3/EFNA5/VEGFA/EPHB1	14	Neuron
BP	GO:0023061	signal release	20/192	446/16917	1.81076e-07	2.02805e-05	1.69138e-05	CPE/NNAT/SOX11/RAB3A/VAMP2/SNAP25/SYT4/SYT13/NRXN1/PCLO/GABBR1/EFNA5/NRXN2/NAPB/SLC32A1/STXBP1/UNC13A/AGT/CCDC186/PREPL	20	Neuron
BP	GO:0050804	modulation of chemical synaptic transmission	20/192	452/16917	2.24263e-07	2.35417e-05	1.96336e-05	INA/GRIA2/NSG1/MAPT/RAB3A/VAMP2/CELF4/SNAP25/SYT4/NRXN1/NTRK2/EFNB3/GABBR1/NRXN2/STXBP1/UNC13A/EPHB1/AGT/PREPL/ATP1A2	20	Neuron
BP	GO:0099177	regulation of trans-synaptic signaling	20/192	453/16917	2.32319e-07	2.35417e-05	1.96336e-05	INA/GRIA2/NSG1/MAPT/RAB3A/VAMP2/CELF4/SNAP25/SYT4/NRXN1/NTRK2/EFNB3/GABBR1/NRXN2/STXBP1/UNC13A/EPHB1/AGT/PREPL/ATP1A2	20	Neuron
BP	GO:1901888	regulation of cell junction assembly	13/192	204/16917	5.99853e-07	5.80221e-05	4.839e-05	SLIT1/NRXN1/NTRK2/CLASP2/EFNB3/DMTN/EFNA5/NEGR1/SLITRK2/SLITRK4/VEGFA/EPHB1/AGT	13	Neuron
CC	GO:0030133	transport vesicle	18/192	402/16917	7.86817e-07	7.27977e-05	6.07127e-05	CPE/RAB3A/VAMP2/SNAP25/SYT4/SCG3/NRSN1/SYT13/RAB3C/RAB3B/ATP6V1G2/GABBR1/SNAP91/GABRA2/SLC32A1/COPG2/UNC13A/ARFGEF3	18	Neuron
BP	GO:0016079	synaptic vesicle exocytosis	9/192	94/16917	1.20032e-06	0.000106428	8.87603e-05	RAB3A/VAMP2/SNAP25/SYT4/PCLO/NAPB/STXBP1/UNC13A/PREPL	9	Neuron
BP	GO:0048709	oligodendrocyte differentiation	9/192	97/16917	1.56627e-06	0.000133321	0.000111189	NKX2-1/SOX11/BNIP3/NTRK2/SHH/DLX1/SOX1/DLX2/SOX6	9	Neuron
BP	GO:0035418	protein localization to synapse	8/192	76/16917	2.31997e-06	0.000189881	0.000158359	NSG1/KIF5A/MAPT/KIF5C/SNAP25/NRXN1/PCLO/NRXN2	8	Neuron
CC	GO:0048786	presynaptic active zone	8/192	80/16917	3.43125e-06	0.000270434	0.00022554	GPM6A/RAB3A/GAD1/PCLO/GABRA3/SLC32A1/STXBP1/UNC13A	8	Neuron
CC	GO:0008021	synaptic vesicle	12/192	204/16917	3.78656e-06	0.000282598	0.000235685	RAB3A/VAMP2/SNAP25/SYT4/RAB3C/RAB3B/ATP6V1G2/GABBR1/SNAP91/GABRA2/SLC32A1/UNC13A	12	Neuron
BP	GO:0051963	regulation of synapse assembly	9/192	108/16917	3.85119e-06	0.000282598	0.000235685	SLIT1/NRXN1/NTRK2/EFNB3/EFNA5/NEGR1/SLITRK2/SLITRK4/EPHB1	9	Neuron
CC	GO:0098978	glutamatergic synapse	17/192	407/16917	4.12017e-06	0.000284061	0.000236905	GPM6A/NSG1/ELAVL4/SNAP25/SYT4/PCLO/BCAN/EFNB3/GABBR1/NRXN2/SLITRK2/NAPB/GABRG2/SLITRK4/STXBP1/EPHB1/SPARCL1	17	Neuron
BP	GO:0140029	exocytic process	8/192	82/16917	4.13811e-06	0.000284061	0.000236905	RAB3A/SNAP25/RAB3C/RAB3B/DMTN/NAPB/STXBP1/UNC13A	8	Neuron
BP	GO:0017156	calcium-ion regulated exocytosis	7/192	64/16917	7.81954e-06	0.000504997	0.000421164	RAB3A/VAMP2/SNAP25/SYT4/SYT13/STXBP1/UNC13A	7	Neuron
CC	GO:0070382	exocytic vesicle	12/192	219/16917	7.83125e-06	0.000504997	0.000421164	RAB3A/VAMP2/SNAP25/SYT4/RAB3C/RAB3B/ATP6V1G2/GABBR1/SNAP91/GABRA2/SLC32A1/UNC13A	12	Neuron
BP	GO:0051952	regulation of amine transport	8/192	90/16917	8.33047e-06	0.000521389	0.000434835	RAB3A/SYT4/SYT13/RAB3B/GABBR1/STXBP1/AGT/ATP1A2	8	Neuron
CC	GO:0030658	transport vesicle membrane	12/192	222/16917	8.98957e-06	0.000534791	0.000446012	CPE/RAB3A/VAMP2/SYT4/SCG3/RAB3C/RAB3B/ATP6V1G2/GABRA2/SLC32A1/UNC13A/ARFGEF3	12	Neuron
BP	GO:0051960	regulation of nervous system development	17/192	433/16917	9.31762e-06	0.000534791	0.000446012	SOX11/MAPT/HMGB2/RUFY3/SYT4/SLIT1/NRXN1/NTRK2/SHH/EFNB3/DLX1/EFNA5/SLITRK2/DLX2/SLITRK4/VEGFA/EPHB1	17	Neuron
BP	GO:0010001	glial cell differentiation	12/192	223/16917	9.40772e-06	0.000534791	0.000446012	NKX2-1/GAP43/SOX11/MAPT/BNIP3/DNER/NTRK2/SHH/DLX1/SOX1/DLX2/SOX6	12	Neuron
CC	GO:0030672	synaptic vesicle membrane	9/192	121/16917	9.80114e-06	0.000534791	0.000446012	RAB3A/VAMP2/SYT4/RAB3C/RAB3B/ATP6V1G2/GABRA2/SLC32A1/UNC13A	9	Neuron
CC	GO:0099501	exocytic vesicle membrane	9/192	121/16917	9.80114e-06	0.000534791	0.000446012	RAB3A/VAMP2/SYT4/RAB3C/RAB3B/ATP6V1G2/GABRA2/SLC32A1/UNC13A	9	Neuron
BP	GO:0001558	regulation of cell growth	16/192	396/16917	1.20917e-05	0.000643281	0.000536492	OLFM1/MAPT/RUFY3/BTG1/SYT4/SLIT1/GNG4/CDKN2D/EFNA5/NEDD4L/PAK5/UNC13A/VEGFA/AGT/MEAF6/AKAP6	16	Neuron
BP	GO:0015837	amine transport	8/192	98/16917	1.56549e-05	0.00081253	0.000677644	RAB3A/SYT4/SYT13/RAB3B/GABBR1/STXBP1/AGT/ATP1A2	8	Neuron
BP	GO:0042391	regulation of membrane potential	16/192	407/16917	1.69532e-05	0.000858964	0.00071637	MAPT/BNIP3/CELF4/CXADR/NRXN1/SCN3B/NTRK2/GABBR1/GABRA3/NEDD4L/ATP1B1/GABRA2/GABRG2/AKAP6/ATP1A2/ANK2	16	Neuron
BP	GO:1901890	positive regulation of cell junction assembly	8/192	100/16917	1.81583e-05	0.000898626	0.000749448	NRXN1/NTRK2/EFNA5/SLITRK2/SLITRK4/VEGFA/EPHB1/AGT	8	Neuron
MF	GO:0000149	SNARE binding	8/192	105/16917	2.59258e-05	0.001226	0.00102248	VAMP2/SNAP25/SYT4/SYT13/SNAP91/NAPB/STXBP1/UNC13A	8	Neuron
BP	GO:1902414	protein localization to cell junction	8/192	105/16917	2.59258e-05	0.001226	0.00102248	NSG1/KIF5A/MAPT/KIF5C/SNAP25/NRXN1/PCLO/NRXN2	8	Neuron
BP	GO:0006887	exocytosis	14/192	334/16917	2.88175e-05	0.00133312	0.00111182	RAB3A/VAMP2/SNAP25/SYT4/SYT13/RAB3C/PCLO/RAB3B/CLASP2/DMTN/NAPB/STXBP1/UNC13A/PREPL	14	Neuron
CC	GO:0097060	synaptic membrane	15/192	382/16917	3.17485e-05	0.00143747	0.00119884	GPM6A/ENO2/GRIA2/NSG1/SNAP25/NRXN1/EFNB3/GABBR1/GABRA3/SNAP91/GABRA2/GABRG2/STXBP1/UNC13A/ANK2	15	Neuron
BP	GO:0045055	regulated exocytosis	11/192	215/16917	3.55114e-05	0.00154677	0.00129	RAB3A/VAMP2/SNAP25/SYT4/SYT13/PCLO/DMTN/NAPB/STXBP1/UNC13A/PREPL	11	Neuron
BP	GO:0048663	neuron fate commitment	6/192	55/16917	3.60918e-05	0.00154677	0.00129	NKX2-1/MYT1L/SHH/DLX1/SOX1/DLX2	6	Neuron
BP	GO:0030900	forebrain development	15/192	387/16917	3.68593e-05	0.00154677	0.00129	NKX2-1/BNIP3/ELAVL4/SLIT1/NTRK2/CDK5R1/DLX5/BCAN/SHH/DLX1/SOX1/SLC32A1/DLX2/SIX3/ATP1A2	15	Neuron
BP	GO:0042063	gliogenesis	13/192	298/16917	3.70702e-05	0.00154677	0.00129	NKX2-1/GAP43/SOX11/MAPT/BNIP3/DNER/NTRK2/CDK5R1/SHH/DLX1/SOX1/DLX2/SOX6	13	Neuron
BP	GO:0010975	regulation of neuron projection development	16/192	435/16917	3.79914e-05	0.0015518	0.00129419	STMN2/MAPT/ELAVL4/RUFY3/SNAP25/SLIT1/NTRK2/CDK5R1/INPP5F/EFNB3/FUT9/EFNA5/NEDD4L/NEGR1/VEGFA/AGT	16	Neuron
BP	GO:0048588	developmental cell growth	11/192	217/16917	3.86492e-05	0.0015518	0.00129419	OLFM1/MAPT/RUFY3/SYT4/SLIT1/EFNA5/NEDD4L/UNC13A/VEGFA/AGT/AKAP6	11	Neuron
CC	GO:0032589	neuron projection membrane	6/192	58/16917	4.89905e-05	0.00192597	0.00160625	MAPT/ADGRV1/GABBR1/GABRA3/GABRA2/GABRG2	6	Neuron
BP	GO:0021537	telencephalon development	12/192	264/16917	4.99395e-05	0.00192597	0.00160625	NKX2-1/BNIP3/NTRK2/CDK5R1/DLX5/BCAN/SHH/DLX1/SLC32A1/DLX2/SIX3/ATP1A2	12	Neuron
BP	GO:0009953	dorsal/ventral pattern formation	7/192	85/16917	5.08429e-05	0.00192597	0.00160625	NKX2-1/CXXC4/SHH/PRKACB/SOX1/SIX3/DDIT3	7	Neuron
BP	GO:0050807	regulation of synapse organization	11/192	224/16917	5.15885e-05	0.00192597	0.00160625	GPM6A/SLIT1/NRXN1/NTRK2/CDK5R1/EFNB3/EFNA5/NEGR1/SLITRK2/SLITRK4/EPHB1	11	Neuron
BP	GO:0015800	acidic amino acid transport	6/192	59/16917	5.40266e-05	0.00194862	0.00162514	SYT4/NTRK2/GABBR1/SLC32A1/STXBP1/ATP1A2	6	Neuron
BP	GO:0051965	positive regulation of synapse assembly	6/192	59/16917	5.40266e-05	0.00194862	0.00162514	NRXN1/NTRK2/EFNA5/SLITRK2/SLITRK4/EPHB1	6	Neuron
BP	GO:0007611	learning or memory	12/192	267/16917	5.56896e-05	0.00197512	0.00164724	MAPT/ELAVL4/SNAP25/SYT4/NRXN1/CAMK2N1/NTRK2/NRXN2/TMOD2/PAK5/AGT/ATP1A2	12	Neuron
BP	GO:0007626	locomotory behavior	10/192	188/16917	5.83077e-05	0.00203408	0.00169641	NKX2-1/GAD1/ELAVL4/SNAP25/INPP5F/EFNB3/NEGR1/PAK5/ARRDC3/ATP1A2	10	Neuron
BP	GO:0017157	regulation of exocytosis	10/192	189/16917	6.09671e-05	0.00209255	0.00174517	RAB3A/VAMP2/SYT4/SYT13/RAB3C/PCLO/RAB3B/CLASP2/STXBP1/PREPL	10	Neuron
BP	GO:0043010	camera-type eye development	13/192	315/16917	6.54286e-05	0.00217745	0.00181598	GPM6A/SOX11/CELF4/NTRK2/SHH/DLX1/TUB/SOX1/DLX2/VEGFA/EPHB1/SIX3/SCAPER	13	Neuron
BP	GO:0050803	regulation of synapse structure or activity	11/192	230/16917	6.54871e-05	0.00217745	0.00181598	GPM6A/SLIT1/NRXN1/NTRK2/CDK5R1/EFNB3/EFNA5/NEGR1/SLITRK2/SLITRK4/EPHB1	11	Neuron
CC	GO:0099572	postsynaptic specialization	14/192	361/16917	6.69244e-05	0.002191	0.00182728	RTN1/GAP43/GRIA2/BNIP3/GNG3/CAMK2N1/PCLO/NTRK2/CDK5R1/EFNB3/DMTN/GABRA3/GABRA2/GABRG2	14	Neuron
BP	GO:0048278	vesicle docking	6/192	64/16917	8.57757e-05	0.00276562	0.00230651	RAB3A/SNAP25/RAB3C/RAB3B/STXBP1/UNC13A	6	Neuron
BP	GO:0016049	cell growth	16/192	467/16917	8.78641e-05	0.00279067	0.0023274	OLFM1/MAPT/RUFY3/BTG1/SYT4/SLIT1/GNG4/CDKN2D/EFNA5/NEDD4L/PAK5/UNC13A/VEGFA/AGT/MEAF6/AKAP6	16	Neuron
CC	GO:0042734	presynaptic membrane	9/192	161/16917	9.38371e-05	0.00293655	0.00244906	GPM6A/SNAP25/NRXN1/EFNB3/GABBR1/GABRA3/SNAP91/STXBP1/UNC13A	9	Neuron
MF	GO:0019905	syntaxin binding	6/192	66/16917	0.000102016	0.00314623	0.00262393	VAMP2/SNAP25/SYT13/NAPB/STXBP1/UNC13A	6	Neuron
BP	GO:0051937	catecholamine transport	6/192	68/16917	0.00012061	0.0036393	0.00303515	RAB3A/SYT4/SYT13/RAB3B/GABBR1/AGT	6	Neuron
BP	GO:1990778	protein localization to cell periphery	13/192	335/16917	0.000121424	0.0036393	0.00303515	NSG1/RAB3A/VAMP2/SNAP25/RAB3C/SCN3B/RAB3B/CLASP2/TUB/ATP1B1/STXBP1/PREPL/ANK2	13	Neuron
BP	GO:0021953	central nervous system neuron differentiation	9/192	167/16917	0.000124089	0.00366753	0.0030587	NKX2-1/MAPT/ELAVL4/NTRK2/SHH/DLX1/SOX1/DLX2/EPHB1	9	Neuron
BP	GO:0001764	neuron migration	9/192	169/16917	0.000135829	0.00395951	0.00330221	NKX2-1/DCX/GPM6A/DNER/NTRK2/CDK5R1/SOX1/VEGFA/NEXMIF	9	Neuron
MF	GO:0030276	clathrin binding	6/192	70/16917	0.000141796	0.00407759	0.00340068	NSG2/NSG1/SYT4/SYT13/DNER/SNAP91	6	Neuron
BP	GO:0001508	action potential	8/192	135/16917	0.000154275	0.0043773	0.00365063	CXADR/SCN3B/NTRK2/NEDD4L/ATP1B1/AKAP6/ATP1A2/ANK2	8	Neuron
BP	GO:0086001	cardiac muscle cell action potential	6/192	72/16917	0.000165827	0.00464315	0.00387235	CXADR/SCN3B/NEDD4L/ATP1B1/ATP1A2/ANK2	6	Neuron
BP	GO:0050890	cognition	12/192	304/16917	0.0001895	0.00523709	0.00436769	MAPT/ELAVL4/SNAP25/SYT4/NRXN1/CAMK2N1/NTRK2/NRXN2/TMOD2/PAK5/AGT/ATP1A2	12	Neuron
BP	GO:0050767	regulation of neurogenesis	13/192	358/16917	0.000233064	0.00634643	0.00529288	SOX11/MAPT/HMGB2/RUFY3/SYT4/SLIT1/NTRK2/SHH/EFNB3/DLX1/EFNA5/DLX2/VEGFA	13	Neuron
BP	GO:0051962	positive regulation of nervous system development	11/192	266/16917	0.000235605	0.00634643	0.00529288	SOX11/MAPT/RUFY3/NRXN1/NTRK2/SHH/EFNA5/SLITRK2/SLITRK4/VEGFA/EPHB1	11	Neuron
BP	GO:0001654	eye development	13/192	360/16917	0.000245989	0.0065433	0.00545706	GPM6A/SOX11/CELF4/NTRK2/SHH/DLX1/TUB/SOX1/DLX2/VEGFA/EPHB1/SIX3/SCAPER	13	Neuron
BP	GO:0015872	dopamine transport	5/192	50/16917	0.00025027	0.00654356	0.00545729	RAB3A/SYT4/SYT13/RAB3B/GABBR1	5	Neuron
CC	GO:0045121	membrane raft	12/192	314/16917	0.0002551	0.00654356	0.00545729	ENO2/MAPT/CXADR/SHH/GABBR1/EFNA5/ATP1B1/EPHB1/AKAP6/ATP1A2/ANK2/SULF1	12	Neuron
BP	GO:0060560	developmental growth involved in morphogenesis	10/192	225/16917	0.000255224	0.00654356	0.00545729	OLFM1/MAPT/RUFY3/SYT4/SLIT1/SHH/EFNA5/NEDD4L/UNC13A/VEGFA	10	Neuron
CC	GO:0098857	membrane microdomain	12/192	315/16917	0.000262611	0.00665282	0.0055484	ENO2/MAPT/CXADR/SHH/GABBR1/EFNA5/ATP1B1/EPHB1/AKAP6/ATP1A2/ANK2/SULF1	12	Neuron
BP	GO:0150063	visual system development	13/192	363/16917	0.000266525	0.00667252	0.00556484	GPM6A/SOX11/CELF4/NTRK2/SHH/DLX1/TUB/SOX1/DLX2/VEGFA/EPHB1/SIX3/SCAPER	13	Neuron
BP	GO:0021761	limbic system development	7/192	111/16917	0.000273152	0.00675893	0.0056369	NKX2-1/CDK5R1/BCAN/DLX1/SLC32A1/DLX2/ATP1A2	7	Neuron
BP	GO:0048167	regulation of synaptic plasticity	9/192	186/16917	0.000278512	0.00679548	0.00566738	NSG1/MAPT/RAB3A/VAMP2/SNAP25/SYT4/NTRK2/STXBP1/AGT	9	Neuron
MF	GO:0015631	tubulin binding	13/192	365/16917	0.000281016	0.00679548	0.00566738	STMN2/DCX/STMN4/KIF5A/MAPT/KIF5C/KIF21B/KIF21A/CDK5R1/CLASP2/REEP1/SGIP1/BEX4	13	Neuron
BP	GO:0048639	positive regulation of developmental growth	8/192	148/16917	0.000289513	0.00691991	0.00577115	MAPT/RUFY3/SYT4/EFNA5/NEDD4L/UNC13A/VEGFA/AKAP6	8	Neuron
BP	GO:0015844	monoamine transport	6/192	80/16917	0.000295917	0.00691991	0.00577115	RAB3A/SYT4/SYT13/RAB3B/GABBR1/AGT	6	Neuron
BP	GO:0140056	organelle localization by membrane tethering	6/192	80/16917	0.000295917	0.00691991	0.00577115	RAB3A/SNAP25/RAB3C/RAB3B/STXBP1/UNC13A	6	Neuron
BP	GO:0050433	regulation of catecholamine secretion	5/192	52/16917	0.000301419	0.00695637	0.00580156	RAB3A/SYT4/SYT13/GABBR1/AGT	5	Neuron
BP	GO:0048880	sensory system development	13/192	368/16917	0.000304014	0.00695637	0.00580156	GPM6A/SOX11/CELF4/NTRK2/SHH/DLX1/TUB/SOX1/DLX2/VEGFA/EPHB1/SIX3/SCAPER	13	Neuron
BP	GO:0007612	learning	8/192	151/16917	0.000331566	0.0073095	0.00609607	ELAVL4/SNAP25/NRXN1/NTRK2/NRXN2/PAK5/AGT/ATP1A2	8	Neuron
BP	GO:0030307	positive regulation of cell growth	8/192	151/16917	0.000331566	0.0073095	0.00609607	MAPT/RUFY3/SYT4/EFNA5/NEDD4L/UNC13A/VEGFA/AKAP6	8	Neuron
BP	GO:0060041	retina development in camera-type eye	8/192	151/16917	0.000331566	0.0073095	0.00609607	GPM6A/CELF4/NTRK2/DLX1/TUB/DLX2/SIX3/SCAPER	8	Neuron
BP	GO:0072659	protein localization to plasma membrane	11/192	277/16917	0.000333187	0.0073095	0.00609607	NSG1/RAB3A/VAMP2/RAB3C/SCN3B/RAB3B/CLASP2/ATP1B1/STXBP1/PREPL/ANK2	11	Neuron
BP	GO:0042886	amide transport	12/192	326/16917	0.000358466	0.00766339	0.00639121	CPE/NNAT/RAB3A/SNAP25/SYT4/PCLO/NTRK2/GABBR1/EFNA5/STXBP1/CCDC186/ATP1A2	12	Neuron
BP	GO:0050432	catecholamine secretion	5/192	54/16917	0.000360122	0.00766339	0.00639121	RAB3A/SYT4/SYT13/GABBR1/AGT	5	Neuron
BP	GO:0097479	synaptic vesicle localization	5/192	54/16917	0.000360122	0.00766339	0.00639121	KIF5A/RAB3A/KIF5C/PCLO/SNAP91	5	Neuron
BP	GO:0021766	hippocampus development	6/192	84/16917	0.000385579	0.00810964	0.00676338	NKX2-1/CDK5R1/BCAN/DLX1/SLC32A1/DLX2	6	Neuron
BP	GO:0051932	synaptic transmission, GABAergic	5/192	55/16917	0.000392525	0.00810964	0.00676338	GABBR1/GABRA3/GABRA2/GABRG2/STXBP1	5	Neuron
BP	GO:1901016	regulation of potassium ion transmembrane transporter activity	5/192	55/16917	0.000392525	0.00810964	0.00676338	VAMP2/NEDD4L/ATP1B1/AKAP6/ANK2	5	Neuron
BP	GO:0009306	protein secretion	12/192	339/16917	0.000508498	0.0104046	0.0086774	NNAT/RAB3A/SNAP25/SYT4/RAB3C/PCLO/RAB3B/DMTN/EFNA5/COPG2/CCDC186/CD200	12	Neuron
BP	GO:0035592	establishment of protein localization to extracellular region	12/192	340/16917	0.000521956	0.0105783	0.00882224	NNAT/RAB3A/SNAP25/SYT4/RAB3C/PCLO/RAB3B/DMTN/EFNA5/COPG2/CCDC186/CD200	12	Neuron
BP	GO:0086065	cell communication involved in cardiac conduction	5/192	59/16917	0.000544599	0.0109331	0.00911811	CXADR/SCN3B/ATP1B1/ATP1A2/ANK2	5	Neuron
BP	GO:0022406	membrane docking	6/192	90/16917	0.000558387	0.0111051	0.00926159	RAB3A/SNAP25/RAB3C/RAB3B/STXBP1/UNC13A	6	Neuron
CC	GO:0030136	clathrin-coated vesicle	9/192	205/16917	0.000566526	0.0111627	0.00930958	RAB3A/GAD1/VAMP2/ATP6V1G2/INPP5F/BTBD8/SNAP91/SLC32A1/SGIP1	9	Neuron
BP	GO:0071692	protein localization to extracellular region	12/192	346/16917	0.000609172	0.0118928	0.00991853	NNAT/RAB3A/SNAP25/SYT4/RAB3C/PCLO/RAB3B/DMTN/EFNA5/COPG2/CCDC186/CD200	12	Neuron
BP	GO:0021700	developmental maturation	11/192	298/16917	0.000614988	0.0118972	0.00992221	RAB3A/NRXN1/SEZ6L/CDK5R1/ATP6V1G2/BCAN/STXBP1/UNC13A/VEGFA/SIX3/DDIT3	11	Neuron
BP	GO:0048638	regulation of developmental growth	11/192	299/16917	0.00063227	0.0121214	0.0101091	OLFM1/MAPT/RUFY3/SYT4/SLIT1/CXADR/EFNA5/NEDD4L/UNC13A/VEGFA/AKAP6	11	Neuron
BP	GO:1990138	neuron projection extension	8/192	167/16917	0.00064834	0.0123185	0.0102735	OLFM1/MAPT/RUFY3/SYT4/SLIT1/NEDD4L/UNC13A/VEGFA	8	Neuron
BP	GO:0051588	regulation of neurotransmitter transport	6/192	93/16917	0.000664727	0.012518	0.01044	RAB3A/SYT4/RAB3B/STXBP1/PREPL/ATP1A2	6	Neuron
BP	GO:0061337	cardiac conduction	6/192	95/16917	0.000743898	0.0138861	0.0115809	CXADR/SCN3B/ATP1B1/AGT/ATP1A2/ANK2	6	Neuron
BP	GO:0045664	regulation of neuron differentiation	8/192	179/16917	0.00101862	0.0188489	0.0157199	SOX11/CDK5R1/MMD/SHH/DLX1/NREP/DLX2/SIX3	8	Neuron
BP	GO:0021543	pallium development	8/192	180/16917	0.00105585	0.0193693	0.0161539	NKX2-1/BNIP3/NTRK2/CDK5R1/BCAN/DLX1/SLC32A1/DLX2	8	Neuron
BP	GO:0006865	amino acid transport	7/192	140/16917	0.00109711	0.0199543	0.0166418	SYT4/NTRK2/GABBR1/SLC32A1/STXBP1/AGT/ATP1A2	7	Neuron
BP	GO:0061387	regulation of extent of cell growth	6/192	103/16917	0.00113586	0.0204494	0.0170547	OLFM1/MAPT/RUFY3/SLIT1/EFNA5/VEGFA	6	Neuron
BP	GO:0050768	negative regulation of neurogenesis	7/192	141/16917	0.00114355	0.0204494	0.0170547	SOX11/RUFY3/SYT4/SLIT1/EFNB3/DLX1/DLX2	7	Neuron
CC	GO:0044291	cell-cell contact zone	5/192	70/16917	0.00119078	0.0211164	0.017611	CXADR/ATP1B1/AKAP6/ATP1A2/ANK2	5	Neuron
CC	GO:0030175	filopodium	6/192	106/16917	0.00131781	0.0231761	0.0193287	GAP43/GPM6A/RUFY3/CXADR/EPHB1/MORN4	6	Neuron
BP	GO:0003407	neural retina development	5/192	73/16917	0.00143795	0.0247791	0.0206656	GPM6A/NTRK2/DLX1/DLX2/SIX3	5	Neuron
BP	GO:0032890	regulation of organic acid transport	5/192	73/16917	0.00143795	0.0247791	0.0206656	SYT4/GABBR1/STXBP1/AGT/ATP1A2	5	Neuron
BP	GO:0010976	positive regulation of neuron projection development	7/192	147/16917	0.00145554	0.0247791	0.0206656	STMN2/ELAVL4/NTRK2/FUT9/NEGR1/VEGFA/AGT	7	Neuron
BP	GO:0051961	negative regulation of nervous system development	7/192	147/16917	0.00145554	0.0247791	0.0206656	SOX11/RUFY3/SYT4/SLIT1/EFNB3/DLX1/DLX2	7	Neuron
BP	GO:0050806	positive regulation of synaptic transmission	7/192	149/16917	0.00157309	0.0265678	0.0221573	NSG1/VAMP2/SNAP25/NRXN1/NTRK2/EFNB3/STXBP1	7	Neuron
BP	GO:0035249	synaptic transmission, glutamatergic	6/192	110/16917	0.0015941	0.0265745	0.0221629	GRIA2/NRXN1/NAPB/STXBP1/UNC13A/ATP1A2	6	Neuron
BP	GO:0050772	positive regulation of axonogenesis	5/192	75/16917	0.00162247	0.0265745	0.0221629	MAPT/RUFY3/NTRK2/EFNA5/VEGFA	5	Neuron
BP	GO:0046879	hormone secretion	10/192	286/16917	0.00162277	0.0265745	0.0221629	CPE/NNAT/SOX11/RAB3A/SNAP25/PCLO/GABBR1/EFNA5/AGT/CCDC186	10	Neuron
CC	GO:0014069	postsynaptic density	11/192	336/16917	0.00162344	0.0265745	0.0221629	RTN1/GAP43/GRIA2/BNIP3/GNG3/CAMK2N1/PCLO/NTRK2/CDK5R1/EFNB3/DMTN	11	Neuron
BP	GO:0031346	positive regulation of cell projection organization	11/192	337/16917	0.00166194	0.026997	0.0225153	STMN2/GPM6A/MAPT/ELAVL4/RUFY3/NTRK2/FUT9/EFNA5/NEGR1/VEGFA/AGT	11	Neuron
CC	GO:0043204	perikaryon	7/192	152/16917	0.00176315	0.0284242	0.0237056	GAP43/OLFM1/ENO2/KIF5A/ELAVL4/RUFY3/CDK5R1	7	Neuron
BP	GO:0050770	regulation of axonogenesis	7/192	154/16917	0.00189945	0.0303913	0.0253461	MAPT/RUFY3/SLIT1/NTRK2/EFNB3/EFNA5/VEGFA	7	Neuron
BP	GO:0048678	response to axon injury	5/192	78/16917	0.0019311	0.030667	0.0255761	GAP43/BNIP3/INPP5F/NREP/MORN4	5	Neuron
BP	GO:0009914	hormone transport	10/192	295/16917	0.00203729	0.0319656	0.026659	CPE/NNAT/SOX11/RAB3A/SNAP25/PCLO/GABBR1/EFNA5/AGT/CCDC186	10	Neuron
BP	GO:1901379	regulation of potassium ion transmembrane transport	5/192	79/16917	0.00204291	0.0319656	0.026659	VAMP2/NEDD4L/ATP1B1/AKAP6/ANK2	5	Neuron
BP	GO:0018209	peptidyl-serine modification	10/192	296/16917	0.00208819	0.0324355	0.0270509	SBK1/NTRK2/CDK5R1/INPP5F/DMTN/TERF2IP/PRKACB/CLK1/SPOCK2/VEGFA	10	Neuron
CC	GO:0005802	trans-Golgi network	9/192	248/16917	0.00214253	0.0330385	0.0275539	NSG2/NSG1/VAMP2/SNAP25/CLASP2/FUT9/CCDC186/NMNAT2/PREPL	9	Neuron
CC	GO:0032279	asymmetric synapse	11/192	350/16917	0.00223415	0.0342034	0.0285254	RTN1/GAP43/GRIA2/BNIP3/GNG3/CAMK2N1/PCLO/NTRK2/CDK5R1/EFNB3/DMTN	11	Neuron
CC	GO:0030135	coated vesicle	10/192	300/16917	0.00230214	0.0349925	0.0291835	RAB3A/GAD1/VAMP2/ATP6V1G2/INPP5F/BTBD8/SNAP91/SLC32A1/COPG2/SGIP1	10	Neuron
CC	GO:0030315	T-tubule	4/192	50/16917	0.00246386	0.0369232	0.0307937	ATP1B1/AKAP6/ATP1A2/ANK2	4	Neuron
BP	GO:2000649	regulation of sodium ion transmembrane transporter activity	4/192	50/16917	0.00246386	0.0369232	0.0307937	SCN3B/NEDD4L/ATP1B1/ATP1A2	4	Neuron
BP	GO:0048593	camera-type eye morphogenesis	6/192	121/16917	0.0025824	0.0381811	0.0318428	SOX11/NTRK2/SOX1/VEGFA/EPHB1/SIX3	6	Neuron
BP	GO:0010721	negative regulation of cell development	9/192	255/16917	0.00258368	0.0381811	0.0318428	SOX11/RUFY3/SYT4/SLIT1/SHH/EFNB3/DLX1/DLX2/VEGFA	9	Neuron
BP	GO:0048013	ephrin receptor signaling pathway	4/192	51/16917	0.00265015	0.0388933	0.0324367	CDK5R1/EFNB3/EFNA5/EPHB1	4	Neuron
MF	GO:0005246	calcium channel regulator activity	4/192	52/16917	0.00284588	0.0406445	0.0338972	TSPAN13/NRXN1/HPCAL4/NRXN2	4	Neuron
BP	GO:0021872	forebrain generation of neurons	4/192	52/16917	0.00284588	0.0406445	0.0338972	NKX2-1/DLX1/SOX1/DLX2	4	Neuron
MF	GO:0050840	extracellular matrix binding	4/192	52/16917	0.00284588	0.0406445	0.0338972	SHH/SPOCK2/VEGFA/SPARCL1	4	Neuron
BP	GO:0099172	presynapse organization	4/192	52/16917	0.00284588	0.0406445	0.0338972	PCLO/EFNB3/SLITRK2/SLITRK4	4	Neuron
BP	GO:0051648	vesicle localization	8/192	211/16917	0.00286599	0.0406589	0.0339092	KIF5A/RAB3A/KIF5C/SYT4/PCLO/CLASP2/SNAP91/CCDC186	8	Neuron
CC	GO:0044306	neuron projection terminus	6/192	124/16917	0.00291802	0.0411229	0.0342962	RAB3A/GAD1/VAMP2/NTRK2/SLC32A1/UNC13A	6	Neuron
BP	GO:0000381	regulation of alternative mRNA splicing, via spliceosome	4/192	53/16917	0.00305127	0.0427178	0.0356264	CELF4/CELF3/NOVA1/CELF5	4	Neuron
MF	GO:0008017	microtubule binding	9/192	262/16917	0.00309406	0.0430338	0.0358899	DCX/KIF5A/MAPT/KIF5C/KIF21B/KIF21A/CLASP2/REEP1/SGIP1	9	Neuron
BP	GO:0031110	regulation of microtubule polymerization or depolymerization	5/192	87/16917	0.0031145	0.0430367	0.0358923	STMN2/STMN4/MAPT/CDK5R1/CLASP2	5	Neuron
MF	GO:0022824	transmitter-gated monoatomic ion channel activity	4/192	54/16917	0.00326657	0.0443531	0.0369902	GRIA2/GABRA3/GABRA2/GABRG2	4	Neuron
MF	GO:0022835	transmitter-gated channel activity	4/192	54/16917	0.00326657	0.0443531	0.0369902	GRIA2/GABRA3/GABRA2/GABRG2	4	Neuron
BP	GO:0030516	regulation of axon extension	5/192	88/16917	0.00327229	0.0443531	0.0369902	OLFM1/MAPT/RUFY3/SLIT1/VEGFA	5	Neuron
CC	GO:0098858	actin-based cell projection	8/192	217/16917	0.00340011	0.0457056	0.0381181	GAP43/GPM6A/RUFY3/CXADR/ADGRV1/SLC4A7/EPHB1/MORN4	8	Neuron
CC	GO:0030665	clathrin-coated vesicle membrane	6/192	128/16917	0.00341503	0.0457056	0.0381181	RAB3A/GAD1/VAMP2/ATP6V1G2/SLC32A1/SGIP1	6	Neuron
BP	GO:0044089	positive regulation of cellular component biogenesis	13/192	482/16917	0.003486	0.0463638	0.0386671	GPM6A/MAPT/NRXN1/NTRK2/CDK5R1/CLASP2/EFNA5/SLITRK2/SLITRK4/MTSS1/VEGFA/EPHB1/AGT	13	Neuron
BP	GO:0090311	regulation of protein deacetylation	4/192	56/16917	0.00372774	0.049271	0.0410917	MAPT/MBIP/VEGFA/BEX4	4	Neuron
CC	GO:0043197	dendritic spine	7/192	174/16917	0.00375777	0.049351	0.0411584	GPM6A/GRIA2/MAPT/NTRK2/CDK5R1/GABBR1/ATP1A2	7	Neuron
BP	GO:0006835	dicarboxylic acid transport	5/192	91/16917	0.00378018	0.049351	0.0411584	SYT4/NTRK2/GABBR1/STXBP1/ATP1A2	5	Neuron
BP	GO:0030072	peptide hormone secretion	8/192	222/16917	0.00390167	0.0505467	0.0421556	CPE/NNAT/RAB3A/SNAP25/PCLO/GABBR1/EFNA5/CCDC186	8	Neuron
BP	GO:0021510	spinal cord development	5/192	92/16917	0.00396135	0.0505467	0.0421556	SOX11/SLIT1/SHH/SOX1/SOX6	5	Neuron
BP	GO:0043266	regulation of potassium ion transport	5/192	92/16917	0.00396135	0.0505467	0.0421556	VAMP2/NEDD4L/ATP1B1/AKAP6/ANK2	5	Neuron
BP	GO:0010812	negative regulation of cell-substrate adhesion	4/192	57/16917	0.00397407	0.0505467	0.0421556	CLASP2/DMTN/EFNA5/NEXMIF	4	Neuron
BP	GO:0055001	muscle cell development	7/192	176/16917	0.00400046	0.0505467	0.0421556	CXADR/DNER/TMOD2/VEGFA/AGT/AKAP6/ANK2	7	Neuron
CC	GO:0098984	neuron to neuron synapse	11/192	378/16917	0.00401428	0.0505467	0.0421556	RTN1/GAP43/GRIA2/BNIP3/GNG3/CAMK2N1/PCLO/NTRK2/CDK5R1/EFNB3/DMTN	11	Neuron
CC	GO:0044309	neuron spine	7/192	177/16917	0.00412618	0.0516501	0.0430758	GPM6A/GRIA2/MAPT/NTRK2/CDK5R1/GABBR1/ATP1A2	7	Neuron
CC	GO:0031256	leading edge membrane	7/192	178/16917	0.00425487	0.0529495	0.0441595	MAPT/ADGRV1/CLASP2/GABBR1/GABRA3/GABRA2/GABRG2	7	Neuron
BP	GO:0010817	regulation of hormone levels	13/192	494/16917	0.00428389	0.0530007	0.0442022	CPE/NNAT/SOX11/RAB3A/SNAP25/PCLO/SHH/GABBR1/AKR1C1/EFNA5/AKR1C2/AGT/CCDC186	13	Neuron
BP	GO:0002790	peptide secretion	8/192	226/16917	0.00434263	0.0534168	0.0445493	CPE/NNAT/RAB3A/SNAP25/PCLO/GABBR1/EFNA5/CCDC186	8	Neuron
BP	GO:0030534	adult behavior	6/192	135/16917	0.00443285	0.0542133	0.0452135	NRXN1/INPP5F/EFNB3/NRXN2/GABRG2/ATP1A2	6	Neuron
BP	GO:0097120	receptor localization to synapse	4/192	59/16917	0.0044993	0.0544007	0.0453698	NSG1/KIF5A/KIF5C/SNAP25	4	Neuron
BP	GO:1902305	regulation of sodium ion transmembrane transport	4/192	59/16917	0.0044993	0.0544007	0.0453698	SCN3B/NEDD4L/ATP1B1/ATP1A2	4	Neuron
MF	GO:0030594	neurotransmitter receptor activity	5/192	95/16917	0.00454212	0.0545178	0.0454674	GRIA2/GABBR1/GABRA3/GABRA2/GABRG2	5	Neuron
BP	GO:0018105	peptidyl-serine phosphorylation	9/192	278/16917	0.00456023	0.0545178	0.0454674	SBK1/NTRK2/CDK5R1/INPP5F/DMTN/TERF2IP/PRKACB/CLK1/VEGFA	9	Neuron
BP	GO:0046530	photoreceptor cell differentiation	4/192	60/16917	0.00477863	0.056494	0.0471156	NTRK2/DLX1/DLX2/VEGFA	4	Neuron
BP	GO:1905330	regulation of morphogenesis of an epithelium	4/192	60/16917	0.00477863	0.056494	0.0471156	SHH/VEGFA/AGT/SULF1	4	Neuron
MF	GO:0099106	ion channel regulator activity	6/192	138/16917	0.00493144	0.0578385	0.0482369	TSPAN13/NRXN1/SCN3B/HPCAL4/NEDD4L/NRXN2	6	Neuron
BP	GO:0045927	positive regulation of growth	8/192	231/16917	0.00494672	0.0578385	0.0482369	MAPT/RUFY3/SYT4/EFNA5/NEDD4L/UNC13A/VEGFA/AKAP6	8	Neuron
BP	GO:0032984	protein-containing complex disassembly	8/192	234/16917	0.0053389	0.0620829	0.0517767	STMN2/STMN4/BNIP3/CLASP2/DMTN/KLC1/NAPB/TMOD2	8	Neuron
BP	GO:0001763	morphogenesis of a branching structure	7/192	187/16917	0.00555422	0.0642357	0.0535721	NKX2-1/SPINT2/SHH/DLX2/VEGFA/AGT/SULF1	7	Neuron
BP	GO:0051893	regulation of focal adhesion assembly	4/192	63/16917	0.00568597	0.0650524	0.0542532	CLASP2/DMTN/EFNA5/VEGFA	4	Neuron
BP	GO:0090109	regulation of cell-substrate junction assembly	4/192	63/16917	0.00568597	0.0650524	0.0542532	CLASP2/DMTN/EFNA5/VEGFA	4	Neuron
MF	GO:0016247	channel regulator activity	6/192	143/16917	0.00585231	0.0662431	0.0552463	TSPAN13/NRXN1/SCN3B/HPCAL4/NEDD4L/NRXN2	6	Neuron
BP	GO:0060078	regulation of postsynaptic membrane potential	6/192	143/16917	0.00585231	0.0662431	0.0552463	CELF4/NRXN1/GABBR1/GABRA3/GABRA2/GABRG2	6	Neuron
BP	GO:0032535	regulation of cellular component size	10/192	343/16917	0.00591016	0.066544	0.0554972	OLFM1/TMSB15A/MAPT/RUFY3/SLIT1/RAB3B/DMTN/EFNA5/TMOD2/VEGFA	10	Neuron
MF	GO:0005230	extracellular ligand-gated monoatomic ion channel activity	4/192	64/16917	0.00601221	0.0673368	0.0561584	GRIA2/GABRA3/GABRA2/GABRG2	4	Neuron
CC	GO:0030662	coated vesicle membrane	7/192	192/16917	0.0063937	0.0712345	0.0594091	RAB3A/GAD1/VAMP2/ATP6V1G2/SLC32A1/COPG2/SGIP1	7	Neuron
BP	GO:0003012	muscle system process	11/192	403/16917	0.00642835	0.0712475	0.0594199	GNAO1/SCN3B/INPP5F/NEDD4L/ATP1B1/TMOD2/AGT/AKAP6/ATP1A2/ANK2/SULF1	11	Neuron
BP	GO:0015833	peptide transport	8/192	242/16917	0.00650125	0.0716822	0.0597824	CPE/NNAT/RAB3A/SNAP25/PCLO/GABBR1/EFNA5/CCDC186	8	Neuron
BP	GO:0051650	establishment of vesicle localization	7/192	193/16917	0.00657236	0.0720927	0.0601248	KIF5A/RAB3A/KIF5C/SYT4/CLASP2/SNAP91/CCDC186	7	Neuron
BP	GO:0045665	negative regulation of neuron differentiation	4/192	66/16917	0.00670157	0.073133	0.0609924	SHH/DLX1/DLX2/SIX3	4	Neuron
BP	GO:0045165	cell fate commitment	8/192	246/16917	0.0071499	0.0772981	0.0644661	NKX2-1/GAP43/MYT1L/SHH/DLX1/SOX1/DLX2/SOX6	8	Neuron
BP	GO:0070997	neuron death	10/192	353/16917	0.0071804	0.0772981	0.0644661	ENO2/MAPT/BNIP3/NTRK2/CDK5R1/DLX1/STXBP1/EPHB1/CD200/DDIT3	10	Neuron
BP	GO:0048706	embryonic skeletal system development	5/192	106/16917	0.00719221	0.0772981	0.0644661	SOX11/SHH/DLX1/DLX2/SULF1	5	Neuron
MF	GO:0030674	protein-macromolecule adaptor activity	10/192	354/16917	0.00731822	0.078145	0.0651724	MAPT/RAB3A/VAMP2/SNAP25/ATP1B1/NAPB/KLHDC10/NMNAT2/AKAP6/ANK2	10	Neuron
BP	GO:0048592	eye morphogenesis	6/192	150/16917	0.00734445	0.078145	0.0651724	SOX11/NTRK2/SOX1/VEGFA/EPHB1/SIX3	6	Neuron
BP	GO:0150116	regulation of cell-substrate junction organization	4/192	68/16917	0.00744135	0.078392	0.0653784	CLASP2/DMTN/EFNA5/VEGFA	4	Neuron
BP	GO:1901880	negative regulation of protein depolymerization	4/192	68/16917	0.00744135	0.078392	0.0653784	STMN2/CLASP2/DMTN/TMOD2	4	Neuron
BP	GO:0090066	regulation of anatomical structure size	12/192	470/16917	0.0075307	0.0789425	0.0658375	OLFM1/TMSB15A/MAPT/RUFY3/SLIT1/RAB3B/DMTN/EFNA5/TMOD2/VEGFA/AGT/ATP1A2	12	Neuron
BP	GO:0000380	alternative mRNA splicing, via spliceosome	4/192	69/16917	0.00783061	0.0808909	0.0674625	CELF4/CELF3/NOVA1/CELF5	4	Neuron
BP	GO:0051899	membrane depolarization	4/192	69/16917	0.00783061	0.0808909	0.0674625	SCN3B/NEDD4L/ATP1A2/ANK2	4	Neuron
[truncated: 13,181 more rows]

## Sheet: Table C
# WARNING - This exported Revigo data is only useful for the specific purpose of constructing a TreeMap visualization.
# Do not use this table as a general list of non-redundant GO categories, as it sets an extremely permissive
# threshold to detect redundancies (c=0.10) and fill the 'representative' column, while normally c>=0.4 is recommended.
# To export a reduced-redundancy set of GO terms, go to the Scatterplot or Table tab, and export from there.
TermID	Name	Frequency	Value	Uniqueness	Dispensability	Representative
GO:0001525	angiogenesis	1.88052	-10.4	0.785856	0	null
GO:0001501	skeletal system development	2.75322	-5.64301	0.849153	0.344404	angiogenesis
GO:0001503	ossification	1.57086	-6.34187	0.939843	0.151642	angiogenesis
GO:0001649	osteoblast differentiation	0.782614	-3.69619	0.892318	0.277994	angiogenesis
GO:0001822	kidney development	1.68346	-5.19224	0.803858	0.323379	angiogenesis
GO:0002062	chondrocyte differentiation	0.467316	-4.06853	0.821445	0.279004	angiogenesis
GO:0003002	regionalization	2.2465	-3.9025	0.850557	0.305003	angiogenesis
GO:0006939	smooth muscle contraction	0.343449	-1.41703	0.948353	0.127745	angiogenesis
GO:0007164	establishment of tissue polarity	0.146388	-1.67581	0.884973	0.34814	angiogenesis
GO:0007389	pattern specification process	2.51675	-3.57646	0.85714	0.316889	angiogenesis
GO:0007492	endoderm development	0.439164	-4.05263	0.870225	0.389242	angiogenesis
GO:0008406	gonad development	1.27808	-3.05432	0.823514	0.360735	angiogenesis
GO:0031214	biomineral tissue development	0.563031	-1.82032	0.850641	0.398413	angiogenesis
GO:0044706	multi-multicellular organism process	1.12606	-1.53661	0.941937	0.145675	angiogenesis
GO:0045444	fat cell differentiation	0.686898	-2.64182	0.902281	0.27415	angiogenesis
GO:0048732	gland development	2.37036	-2.35125	0.859966	0.389205	angiogenesis
GO:0048736	appendage development	1.03035	-1.96112	0.870074	0.277194	angiogenesis
GO:0048863	stem cell differentiation	1.02472	-1.92237	0.898307	0.286289	angiogenesis
GO:0048880	sensory system development	2.18456	-1.60627	0.852969	0.351364	angiogenesis
GO:0050817	coagulation	0.996566	-2.14432	0.942669	0.143602	angiogenesis
GO:0051146	striated muscle cell differentiation	1.16547	-4.60596	0.868448	0.208607	angiogenesis
GO:0055123	digestive system development	0.810765	-2.0195	0.867364	0.296495	angiogenesis
GO:0060021	roof of mouth development	0.512359	-1.67581	0.906323	0.190067	angiogenesis
GO:0060173	limb development	1.03035	-1.96112	0.859384	0.277194	angiogenesis
GO:0060324	face development	0.292776	-3.00039	0.906589	0.179222	angiogenesis
GO:0060541	respiratory system development	1.15984	-1.54051	0.862499	0.309088	angiogenesis
GO:0061458	reproductive system development	1.68909	-2.77767	0.856994	0.323513	angiogenesis
GO:0061564	axon development	2.25213	-1.81635	0.813401	0.352813	angiogenesis
GO:0072001	renal system development	1.73977	-5.8893	0.856543	0.324705	angiogenesis
GO:0090130	tissue migration	0.619334	-1.34931	0.945354	0.136061	angiogenesis
GO:1904888	cranial skeletal system development	0.405383	-1.438	0.908373	0.185373	angiogenesis
GO:0001667	ameboidal-type cell migration	1.1148	-3.64457	0.98113	0.00518039	null
GO:0001913	T cell mediated cytotoxicity	0.106976	-1.37468	0.981308	0.0786691	null
GO:0006520	amino acid metabolic process	1.57649	-9.31332	0.891631	0.00539611	null
GO:0006091	generation of precursor metabolites and energy	2.08885	-4.88382	0.959468	0.140915	amino acid metabolic process
GO:0006575	cellular modified amino acid metabolic process	0.647486	-1.70476	0.953778	0.207058	amino acid metabolic process
GO:0006643	membrane lipid metabolic process	1.15984	-2.11523	0.9425	0.131282	amino acid metabolic process
GO:0006790	sulfur compound metabolic process	1.72288	-1.69739	0.960324	0.142493	amino acid metabolic process
GO:0033013	tetrapyrrole metabolic process	0.309667	-1.58692	0.951466	0.191674	amino acid metabolic process
GO:0035383	thioester metabolic process	0.506728	-1.43977	0.962049	0.11976	amino acid metabolic process
GO:0045333	cellular respiration	1.09228	-2.73882	0.94158	0.130373	amino acid metabolic process
GO:0072524	pyridine-containing compound metabolic process	0.444795	-2.16367	0.949688	0.19893	amino acid metabolic process
GO:0072593	reactive oxygen species metabolic process	0.591183	-2.64418	0.964495	0.121749	amino acid metabolic process
GO:0006979	response to oxidative stress	2.03817	-3.98648	0.969653	0	null
GO:0000302	response to reactive oxygen species	0.979675	-2.85229	0.954955	0.316098	response to oxidative stress
GO:0042060	wound healing	1.89179	-2.27148	0.96586	0.34256	response to oxidative stress
GO:0062197	cellular response to chemical stress	1.49766	-2.5994	0.950127	0.332673	response to oxidative stress
GO:0071229	cellular response to acid chemical	0.467316	-1.52671	0.962965	0.365264	response to oxidative stress
GO:0071453	cellular response to oxygen levels	0.822026	-1.99349	0.959874	0.388178	response to oxidative stress
GO:0007584	response to nutrient	0.827656	-1.97818	0.960942	0.0971966	null
GO:0048545	response to steroid hormone	1.6159	-1.72007	0.957316	0.268447	response to nutrient
GO:0071496	cellular response to external stimulus	1.80733	-1.93286	0.973307	0.395242	response to nutrient
GO:0010810	regulation of cell-substrate adhesion	1.21615	-2.99341	0.968375	0.0460216	null
GO:0010975	regulation of neuron projection development	2.49986	-3.21547	0.942977	0.050617	null
GO:0150116	regulation of cell-substrate junction organization	0.388492	-1.8255	0.958503	0.371049	regulation of neuron projection development
GO:1903053	regulation of extracellular matrix organization	0.320928	-1.73204	0.95923	0.363532	regulation of neuron projection development
GO:0016052	carbohydrate catabolic process	0.624965	-1.41492	0.954411	0.0887865	null
GO:0019058	viral life cycle	1.02472	-1.61762	1	0	null
GO:0030198	extracellular matrix organization	1.54271	-17.642	0.967829	0	null
GO:0007009	plasma membrane organization	0.833286	-1.85555	0.970473	0.180567	extracellular matrix organization
GO:0007033	vacuole organization	1.04724	-2.08471	0.962754	0.3069	extracellular matrix organization
GO:0007040	lysosome organization	0.568662	-1.72235	0.962514	0.288529	extracellular matrix organization
GO:0007044	cell-substrate junction assembly	0.225213	-2.93023	0.959609	0.157558	extracellular matrix organization
GO:0022613	ribonucleoprotein complex biogenesis	2.55616	-1.90218	0.962742	0.330455	extracellular matrix organization
GO:0031032	actomyosin structure organization	0.653116	-2.99341	0.951893	0.175787	extracellular matrix organization
GO:0043062	extracellular structure organization	1.54834	-17.642	0.970488	0.194235	extracellular matrix organization
GO:0045229	external encapsulating structure organization	1.5596	-17.642	0.970465	0.19415	extracellular matrix organization
GO:1903008	organelle disassembly	0.596813	-2.46784	0.961119	0.289902	extracellular matrix organization
GO:0030335	positive regulation of cell migration	2.93902	-5.83034	0.929541	0	null
GO:0010556	regulation of macromolecule biosynthetic process	22.2454	-1.54316	0.947527	0.277195	positive regulation of cell migration
GO:0010608	post-transcriptional regulation of gene expression	3.09104	-1.54316	0.960011	0.162571	positive regulation of cell migration
GO:0034248	regulation of amide metabolic process	2.92213	-1.88333	0.958091	0.183755	positive regulation of cell migration
GO:1901800	positive regulation of proteasomal protein catabolic process	0.664377	-2.69035	0.906719	0.162076	positive regulation of cell migration
GO:0031589	cell-substrate adhesion	1.03598	-3.35181	0.987918	0.00513693	null
GO:0032963	collagen metabolic process	0.349079	-3.96215	0.979365	0.0681893	null
GO:0032970	regulation of actin filament-based process	2.16204	-1.72427	0.974211	0.0496187	null
GO:0035088	establishment or maintenance of apical/basal cell polarity	0.326558	-1.37468	0.993803	0.00453764	null
GO:0042440	pigment metabolic process	0.36034	-1.38704	0.979303	0.0684108	null
GO:0045765	regulation of angiogenesis	1.58775	-4.06853	0.922375	0.0361089	null
GO:0030278	regulation of ossification	0.664377	-1.64663	0.958821	0.326888	regulation of angiogenesis
GO:0045598	regulation of fat cell differentiation	0.743201	-2.84253	0.945323	0.379555	regulation of angiogenesis
GO:0050818	regulation of coagulation	0.411013	-2.26108	0.960691	0.310599	regulation of angiogenesis
GO:0048145	regulation of fibroblast proliferation	0.478577	-2.82711	0.964303	0.0411823	null
GO:0048146	positive regulation of fibroblast proliferation	0.292776	-2.4488	0.949219	0.384892	regulation of fibroblast proliferation
GO:1904705	regulation of vascular associated smooth muscle cell proliferation	0.349079	-1.82683	0.963475	0.391046	regulation of fibroblast proliferation
GO:0048193	Golgi vesicle transport	1.6159	-3.61412	0.983517	0	null
GO:0006839	mitochondrial transport	0.833286	-2.85229	0.979706	0.368073	Golgi vesicle transport
GO:0015807	L-amino acid transport	0.439164	-2.26509	0.976009	0.255047	Golgi vesicle transport
GO:0072594	establishment of protein localization to organelle	1.90868	-3.50834	0.974499	0.28976	Golgi vesicle transport
GO:1990542	mitochondrial transmembrane transport	0.332189	-2.37869	0.982858	0.247806	Golgi vesicle transport
GO:0050673	epithelial cell proliferation	0.951523	-3.96703	0.985741	0.00508744	null
GO:0051346	negative regulation of hydrolase activity	1.79044	-1.54316	0.961934	0.0312501	null
GO:0051452	intracellular pH reduction	0.292776	-2.6677	0.95551	0.0252048	null
GO:0050878	regulation of body fluid levels	1.97624	-1.86422	0.966287	0.311456	intracellular pH reduction
GO:1900046	regulation of hemostasis	0.399752	-1.72235	0.961783	0.321724	intracellular pH reduction
GO:0051701	biological process involved in interaction with host	0.917741	-1.59345	0.997946	0	null
GO:0097193	intrinsic apoptotic signaling pathway	0.912111	-3.85856	0.937772	0.0982959	null
GO:0007229	integrin-mediated signaling pathway	0.54051	-2.44128	0.945605	0.194283	intrinsic apoptotic signaling pathway
GO:0140053	mitochondrial gene expression	0.799505	-4.43478	0.965828	0.0829197	null
GO:0031638	zymogen activation	0.275885	-2.62949	0.953901	0.394429	mitochondrial gene expression
GO:0140253	cell-cell fusion	0.253364	-2.27622	0.996992	0.00442418	null
GO:1901617	organic hydroxy compound biosynthetic process	0.962784	-1.75843	0.954107	0.0846721	null
GO:2000241	regulation of reproductive process	1.16547	-1.40178	0.979881	0.0347097	null
GO:2000242	negative regulation of reproductive process	0.411013	-1.84691	0.966489	0.0306996	null
GO:0034249	negative regulation of amide metabolic process	1.13169	-1.33512	0.944453	0.20951	negative regulation of reproductive process
GO:0051051	negative regulation of transport	2.40977	-1.77335	0.959636	0.186495	negative regulation of reproductive process
GO:2000377	regulation of reactive oxygen species metabolic process	0.788244	-1.53676	0.961992	0.0436374	null
GO:2001233	regulation of apoptotic signaling pathway	2.08322	-5.04008	0.929267	0.0493697	null
GO:0001959	regulation of cytokine-mediated signaling pathway	0.850177	-1.40451	0.938605	0.345344	regulation of apoptotic signaling pathway
GO:0030111	regulation of Wnt signaling pathway	1.84674	-1.45113	0.938897	0.379414	regulation of apoptotic signaling pathway
GO:0032102	negative regulation of response to external stimulus	2.37036	-1.73545	0.925383	0.309234	regulation of apoptotic signaling pathway
GO:0061041	regulation of wound healing	0.72068	-2.2213	0.942819	0.267415	regulation of apoptotic signaling pathway
GO:0090092	regulation of transmembrane receptor protein serine/threonine kinase signaling pathway	1.54271	-2.07534	0.940086	0.370928	regulation of apoptotic signaling pathway
GO:0090287	regulation of cellular response to growth factor stimulus	1.73977	-2.24291	0.948955	0.297162	regulation of apoptotic signaling pathway
GO:1901796	regulation of signal transduction by p53 class mediator	0.585553	-1.63629	0.939717	0.331054	regulation of apoptotic signaling pathway
